# Supplementary material
Source: publisher figshare collection journal article supplement (https://acs.figshare.com/ndownloader/files/7293302)
Supplement: Supplementary file 1 [file 7293302]

data_Tetrahyropyridine
 
_audit_creation_method            SHELXL-2014
_chemical_name_systematic
;
 ?
;
_chemical_name_common             Tetrahyropyridine
_chemical_melting_point           ?
_chemical_formula_moiety          'C26 H31 N O6'
_chemical_formula_sum
 'C26 H31 N O6' 
_chemical_formula_weight          453.52

loop_
 _atom_type_symbol
 _atom_type_description
 _atom_type_scat_dispersion_real
 _atom_type_scat_dispersion_imag
 _atom_type_scat_source
 'C'  'C'   0.0033   0.0016
 'International Tables Vol C Tables 4.2.6.8 and 6.1.1.4'
 'H'  'H'   0.0000   0.0000
 'International Tables Vol C Tables 4.2.6.8 and 6.1.1.4'
 'N'  'N'   0.0061   0.0033
 'International Tables Vol C Tables 4.2.6.8 and 6.1.1.4'
 'O'  'O'   0.0106   0.0060
 'International Tables Vol C Tables 4.2.6.8 and 6.1.1.4'
 
_space_group_crystal_system       monoclinic
_space_group_IT_number            14
_space_group_name_H-M_alt         'P 21/c'
_space_group_name_Hall            '-P 2ybc'
 
_shelx_space_group_comment
;
The symmetry employed for this shelxl refinement is uniquely defined
by the following loop, which should always be used as a source of
symmetry information in preference to the above space-group names.
They are only intended as comments.
;
 
loop_
 _space_group_symop_operation_xyz
 'x, y, z'
 '-x, y+1/2, -z+1/2'
 '-x, -y, -z'
 'x, -y-1/2, z-1/2'
 
_cell_length_a                    10.5678(8)
_cell_length_b                    25.3656(19)
_cell_length_c                    8.8316(8)
_cell_angle_alpha                 90
_cell_angle_beta                  94.809(3)
_cell_angle_gamma                 90
_cell_volume                      2359.1(3)
_cell_formula_units_Z             4
_cell_measurement_temperature     140(2)
_cell_measurement_reflns_used     5881 
_cell_measurement_theta_min       2.5 
_cell_measurement_theta_max       28.4 
 
_exptl_crystal_description        'block' 
_exptl_crystal_colour             'light-yellow' 
_exptl_crystal_density_meas       1.28 
_exptl_crystal_density_method     'not measured'              
_exptl_crystal_density_diffrn     1.277          
_exptl_crystal_F_000              968
_exptl_transmission_factor_min    ?                                             
_exptl_transmission_factor_max    ?                                             
_exptl_crystal_size_max           0.360
_exptl_crystal_size_mid           0.200
_exptl_crystal_size_min           0.160
_exptl_absorpt_coefficient_mu     0.090
_shelx_estimated_absorpt_T_min    0.968
_shelx_estimated_absorpt_T_max    0.986
_exptl_absorpt_correction_type    'Empirical' 
_exptl_absorpt_correction_T_min   0.6600 
_exptl_absorpt_correction_T_max   0.7457 
_exptl_absorpt_process_details    'SADABS' 
 
_exptl_special_details
;
 ?
;
 
_diffrn_ambient_temperature       140(2)
_diffrn_radiation_wavelength      0.71073
_diffrn_radiation_type            MoK\a
_diffrn_source                    'fine-focus sealed tube'
_diffrn_measurement_device_type   'Bruker D8 Venture PHOTON 100 CMOS' 
_diffrn_measurement_method        'phi and omega scans' 
_diffrn_detector_area_resol_mean  ? 
_diffrn_reflns_number             52448
_diffrn_reflns_av_unetI/netI      0.0351
_diffrn_reflns_av_R_equivalents   0.0562
_diffrn_reflns_limit_h_min        -14
_diffrn_reflns_limit_h_max        14
_diffrn_reflns_limit_k_min        -34
_diffrn_reflns_limit_k_max        33
_diffrn_reflns_limit_l_min        -11
_diffrn_reflns_limit_l_max        11
_diffrn_reflns_theta_min          2.450
_diffrn_reflns_theta_max          28.446
_diffrn_reflns_theta_full         25.242
_diffrn_measured_fraction_theta_max   0.989
_diffrn_measured_fraction_theta_full  0.999
_diffrn_reflns_Laue_measured_fraction_max    0.989
_diffrn_reflns_Laue_measured_fraction_full   0.999
_diffrn_reflns_point_group_measured_fraction_max   0.989
_diffrn_reflns_point_group_measured_fraction_full  0.999
_reflns_number_total              5881
_reflns_number_gt                 4585
_reflns_threshold_expression      'I > 2\s(I)'
_reflns_Friedel_coverage          0.000
_reflns_Friedel_fraction_max      .
_reflns_Friedel_fraction_full     .
 
_reflns_special_details
;
 Reflections were merged by SHELXL according to the crystal
 class for the calculation of statistics and refinement.
 
 _reflns_Friedel_fraction is defined as the number of unique
 Friedel pairs measured divided by the number that would be
 possible theoretically, ignoring centric projections and
 systematic absences.
;
 
_computing_data_collection        'APEX2 (Bruker, 2014)'
_computing_cell_refinement        'APEX2 (Bruker, 2014); SAINT (Bruker, 2014)'
_computing_data_reduction         'SAINT (Bruker, 2014);XPREP(Sheldrick,2014)'
_computing_structure_solution     'SHELXS-2014 (Sheldrick, 2014)'
_computing_structure_refinement   'SHELXL-2014 (Sheldrick, 2014)'
_computing_molecular_graphics     'ortep, pluton'
_computing_publication_material   ?
 
_refine_special_details
;
 ?
;
_refine_ls_structure_factor_coef  Fsqd
_refine_ls_matrix_type            full
_refine_ls_weighting_scheme       calc
_refine_ls_weighting_details
'w=1/[\s^2^(Fo^2^)+(0.0557P)^2^+2.7264P] where P=(Fo^2^+2Fc^2^)/3'
_atom_sites_solution_primary      ?
_atom_sites_solution_secondary    ?
_atom_sites_solution_hydrogens    geom
_refine_ls_hydrogen_treatment     constr
_refine_ls_extinction_method      none
_refine_ls_extinction_coef        .
_refine_ls_number_reflns          5881
_refine_ls_number_parameters      303
_refine_ls_number_restraints      0
_refine_ls_R_factor_all           0.0877
_refine_ls_R_factor_gt            0.0636
_refine_ls_wR_factor_ref          0.1553
_refine_ls_wR_factor_gt           0.1431
_refine_ls_goodness_of_fit_ref    1.069
_refine_ls_restrained_S_all       1.069
_refine_ls_shift/su_max           0.015
_refine_ls_shift/su_mean          0.000
 
loop_
 _atom_site_label
 _atom_site_type_symbol
 _atom_site_fract_x
 _atom_site_fract_y
 _atom_site_fract_z
 _atom_site_U_iso_or_equiv
 _atom_site_adp_type
 _atom_site_occupancy
 _atom_site_site_symmetry_order  
 _atom_site_calc_flag
 _atom_site_refinement_flags_posn
 _atom_site_refinement_flags_adp
 _atom_site_refinement_flags_occupancy
 _atom_site_disorder_assembly
 _atom_site_disorder_group
O1 O 0.65590(13) 0.63988(7) 0.07217(17) 0.0284(4) Uani 1 1 d . . . . .
O2 O 0.06358(15) 0.64015(6) 0.86405(16) 0.0270(3) Uani 1 1 d . . . . .
O3 O 0.10534(14) 0.56423(6) 0.74463(16) 0.0243(3) Uani 1 1 d . . . . .
O4 O -0.07028(13) 0.70387(5) 0.48703(17) 0.0228(3) Uani 1 1 d . . . . .
O5 O 0.08836(17) 0.72989(6) 0.65636(19) 0.0361(4) Uani 1 1 d . . . . .
O6 O 0.45541(14) 0.68042(7) -0.06617(17) 0.0335(4) Uani 1 1 d . . . . .
N1 N -0.00244(14) 0.58631(6) 0.35737(18) 0.0160(3) Uani 1 1 d . . . . .
C1 C 0.76958(19) 0.61902(9) 0.1475(3) 0.0273(5) Uani 1 1 d . . . . .
H1 H 0.7949 0.6403 0.2348 0.041 Uiso 1 1 calc R U . . .
H3 H 0.8356 0.6193 0.0791 0.041 Uiso 1 1 calc R U . . .
H4 H 0.7548 0.5835 0.1792 0.041 Uiso 1 1 calc R U . . .
C2 C 0.55119(18) 0.64021(8) 0.1526(2) 0.0194(4) Uani 1 1 d . . . . .
C3 C 0.44107(18) 0.66214(8) 0.0766(2) 0.0198(4) Uani 1 1 d . . . . .
C4 C 0.32959(18) 0.66380(8) 0.1471(2) 0.0188(4) Uani 1 1 d . . . . .
H5 H 0.2573 0.6783 0.0960 0.023 Uiso 1 1 calc R U . . .
C5 C 0.32361(18) 0.64402(8) 0.2939(2) 0.0184(4) Uani 1 1 d . . . . .
C6 C 0.19587(18) 0.64409(8) 0.3611(2) 0.0194(4) Uani 1 1 d . . . . .
H6 H 0.1553 0.6784 0.3407 0.023 Uiso 1 1 calc R U . . .
C7 C 0.20481(18) 0.63425(8) 0.5311(2) 0.0196(4) Uani 1 1 d . . . . .
H26 H 0.2603 0.6602 0.5828 0.023 Uiso 1 1 calc R U . . .
H25 H 0.2403 0.5995 0.5532 0.023 Uiso 1 1 calc R U . . .
C8 C 0.07080(18) 0.63798(8) 0.5880(2) 0.0173(4) Uani 1 1 d . . . . .
C9 C -0.02212(17) 0.60293(7) 0.4889(2) 0.0143(4) Uani 1 1 d . . . . .
C10 C -0.14041(17) 0.58538(7) 0.5562(2) 0.0161(4) Uani 1 1 d . . . . .
C11 C -0.20199(19) 0.61665(8) 0.6573(2) 0.0206(4) Uani 1 1 d . . . . .
H19 H -0.1692 0.6497 0.6840 0.025 Uiso 1 1 calc R U . . .
C12 C -0.31106(19) 0.59938(9) 0.7187(2) 0.0231(4) Uani 1 1 d . . . . .
H18 H -0.3510 0.6212 0.7846 0.028 Uiso 1 1 calc R U . . .
C13 C -0.36133(18) 0.55006(9) 0.6832(2) 0.0227(4) Uani 1 1 d . . . . .
C14 C -0.4783(2) 0.53120(10) 0.7545(3) 0.0338(5) Uani 1 1 d . . . . .
H2 H -0.4937 0.4949 0.7287 0.051 Uiso 1 1 calc R U . . .
H15 H -0.5501 0.5520 0.7173 0.051 Uiso 1 1 calc R U . . .
H14 H -0.4653 0.5347 0.8629 0.051 Uiso 1 1 calc R U . . .
C15 C 0.07924(18) 0.61614(8) 0.7506(2) 0.0197(4) Uani 1 1 d . . . . .
C16 C 0.0995(2) 0.53307(8) 0.8833(2) 0.0229(4) Uani 1 1 d . . . . .
H7 H 0.0654 0.4984 0.8576 0.027 Uiso 1 1 calc R U . . .
H11 H 0.0432 0.5501 0.9495 0.027 Uiso 1 1 calc R U . . .
C17 C 0.2291(2) 0.52763(10) 0.9644(3) 0.0319(5) Uani 1 1 d . . . . .
H8 H 0.2852 0.5115 0.8980 0.048 Uiso 1 1 calc R U . . .
H10 H 0.2242 0.5060 1.0530 0.048 Uiso 1 1 calc R U . . .
H9 H 0.2609 0.5619 0.9943 0.048 Uiso 1 1 calc R U . . .
C18 C 0.11102(17) 0.60114(8) 0.2838(2) 0.0179(4) Uani 1 1 d . . . . .
H13 H 0.0845 0.6129 0.1815 0.021 Uiso 1 1 calc R U . . .
H12 H 0.1623 0.5697 0.2750 0.021 Uiso 1 1 calc R U . . .
C19 C -0.29979(19) 0.51876(8) 0.5831(2) 0.0234(4) Uani 1 1 d . . . . .
H16 H -0.3322 0.4855 0.5578 0.028 Uiso 1 1 calc R U . . .
C20 C -0.19116(19) 0.53585(8) 0.5198(2) 0.0205(4) Uani 1 1 d . . . . .
H17 H -0.1521 0.5141 0.4529 0.025 Uiso 1 1 calc R U . . .
C21 C 0.03161(19) 0.69614(8) 0.5847(2) 0.0203(4) Uani 1 1 d . . . . .
C22 C -0.1192(2) 0.75728(8) 0.4724(3) 0.0298(5) Uani 1 1 d . . . . .
H21 H -0.0647 0.7788 0.4143 0.036 Uiso 1 1 calc R U . . .
H20 H -0.1231 0.7731 0.5719 0.036 Uiso 1 1 calc R U . . .
C23 C -0.2490(3) 0.75336(10) 0.3924(3) 0.0397(6) Uani 1 1 d . . . . .
H23 H -0.2432 0.7390 0.2926 0.060 Uiso 1 1 calc R U . . .
H22 H -0.2866 0.7878 0.3842 0.060 Uiso 1 1 calc R U . . .
H24 H -0.3006 0.7307 0.4489 0.060 Uiso 1 1 calc R U . . .
C24 C 0.43305(19) 0.62393(8) 0.3687(2) 0.0218(4) Uani 1 1 d . . . . .
H27 H 0.4310 0.6114 0.4675 0.026 Uiso 1 1 calc R U . . .
C25 C 0.54666(18) 0.62202(8) 0.2992(2) 0.0211(4) Uani 1 1 d . . . . .
H28 H 0.6194 0.6085 0.3517 0.025 Uiso 1 1 calc R U . . .
C26 C 0.3681(2) 0.71880(10) -0.1256(3) 0.0356(6) Uani 1 1 d . . . . .
H30 H 0.2858 0.7030 -0.1452 0.053 Uiso 1 1 calc R U . . .
H29 H 0.3957 0.7326 -0.2185 0.053 Uiso 1 1 calc R U . . .
H31 H 0.3634 0.7469 -0.0534 0.053 Uiso 1 1 calc R U . . .
 
loop_
 _atom_site_aniso_label
 _atom_site_aniso_U_11
 _atom_site_aniso_U_22
 _atom_site_aniso_U_33
 _atom_site_aniso_U_23
 _atom_site_aniso_U_13
 _atom_site_aniso_U_12
O1 0.0170(7) 0.0479(10) 0.0210(8) 0.0127(7) 0.0062(6) 0.0092(6)
O2 0.0344(8) 0.0318(8) 0.0149(7) -0.0063(6) 0.0024(6) 0.0056(6)
O3 0.0343(8) 0.0230(7) 0.0158(7) 0.0021(6) 0.0040(6) 0.0060(6)
O4 0.0251(7) 0.0171(7) 0.0271(8) 0.0004(6) 0.0069(6) 0.0018(5)
O5 0.0482(10) 0.0229(8) 0.0354(9) -0.0051(7) -0.0069(8) -0.0078(7)
O6 0.0246(8) 0.0549(11) 0.0217(8) 0.0218(7) 0.0058(6) 0.0108(7)
N1 0.0142(7) 0.0194(8) 0.0143(8) -0.0004(6) 0.0007(6) 0.0005(6)
C1 0.0176(10) 0.0350(12) 0.0298(12) 0.0057(9) 0.0043(8) 0.0078(8)
C2 0.0159(9) 0.0239(10) 0.0190(9) 0.0039(8) 0.0044(7) 0.0016(7)
C3 0.0193(9) 0.0243(10) 0.0159(9) 0.0060(8) 0.0020(7) 0.0017(8)
C4 0.0162(9) 0.0226(9) 0.0173(9) 0.0019(7) 0.0000(7) 0.0017(7)
C5 0.0177(9) 0.0221(9) 0.0156(9) -0.0021(7) 0.0029(7) -0.0026(7)
C6 0.0178(9) 0.0254(10) 0.0155(9) 0.0014(8) 0.0034(7) 0.0009(8)
C7 0.0171(9) 0.0253(10) 0.0163(9) -0.0001(8) 0.0013(7) -0.0002(7)
C8 0.0175(9) 0.0231(10) 0.0118(8) -0.0038(7) 0.0031(7) -0.0018(7)
C9 0.0139(8) 0.0155(8) 0.0135(8) 0.0007(7) 0.0002(7) 0.0008(7)
C10 0.0150(8) 0.0214(9) 0.0118(8) 0.0031(7) 0.0004(7) 0.0012(7)
C11 0.0217(10) 0.0229(10) 0.0176(10) -0.0022(8) 0.0042(8) -0.0024(8)
C12 0.0219(10) 0.0294(11) 0.0189(10) -0.0011(8) 0.0067(8) 0.0000(8)
C13 0.0182(9) 0.0304(11) 0.0194(10) 0.0071(8) 0.0011(8) -0.0033(8)
C14 0.0249(11) 0.0438(14) 0.0336(13) 0.0067(10) 0.0078(9) -0.0081(10)
C15 0.0163(9) 0.0265(10) 0.0162(9) -0.0018(8) 0.0000(7) 0.0021(7)
C16 0.0269(10) 0.0236(10) 0.0188(10) 0.0052(8) 0.0051(8) -0.0001(8)
C17 0.0356(12) 0.0356(13) 0.0241(11) 0.0029(9) 0.0002(9) 0.0031(10)
C18 0.0164(9) 0.0257(10) 0.0119(9) -0.0014(7) 0.0032(7) 0.0001(7)
C19 0.0235(10) 0.0210(10) 0.0253(11) 0.0033(8) 0.0003(8) -0.0050(8)
C20 0.0213(9) 0.0196(9) 0.0208(10) 0.0004(8) 0.0028(8) 0.0005(7)
C21 0.0244(10) 0.0218(10) 0.0155(9) -0.0008(7) 0.0062(8) -0.0042(8)
C22 0.0417(13) 0.0164(10) 0.0327(12) 0.0045(9) 0.0105(10) 0.0053(9)
C23 0.0445(14) 0.0293(12) 0.0463(15) 0.0060(11) 0.0102(12) 0.0174(11)
C24 0.0231(10) 0.0288(11) 0.0137(9) 0.0058(8) 0.0033(8) -0.0011(8)
C25 0.0159(9) 0.0275(10) 0.0196(10) 0.0067(8) -0.0004(7) 0.0019(8)
C26 0.0435(14) 0.0392(13) 0.0226(11) 0.0141(10) -0.0051(10) 0.0062(11)
 
_geom_special_details
;
 All esds (except the esd in the dihedral angle between two l.s. planes)
 are estimated using the full covariance matrix.  The cell esds are taken
 into account individually in the estimation of esds in distances, angles
 and torsion angles; correlations between esds in cell parameters are only
 used when they are defined by crystal symmetry.  An approximate (isotropic)
 treatment of cell esds is used for estimating esds involving l.s. planes.
;
 
loop_
 _geom_bond_atom_site_label_1
 _geom_bond_atom_site_label_2
 _geom_bond_distance
 _geom_bond_site_symmetry_2
 _geom_bond_publ_flag
O1 C2 1.364(2) . ?
O1 C1 1.425(2) . ?
O2 C15 1.196(2) . ?
O3 C15 1.347(2) . ?
O3 C16 1.463(2) . ?
O4 C21 1.337(2) . ?
O4 C22 1.452(2) . ?
O5 C21 1.196(2) . ?
O6 C3 1.364(2) . ?
O6 C26 1.412(3) . ?
N1 C9 1.269(2) . ?
N1 C18 1.460(2) . ?
C1 H1 0.9600 . ?
C1 H3 0.9600 . ?
C1 H4 0.9600 . ?
C2 C25 1.379(3) . ?
C2 C3 1.408(3) . ?
C3 C4 1.378(3) . ?
C4 C5 1.397(3) . ?
C4 H5 0.9300 . ?
C5 C24 1.380(3) . ?
C5 C6 1.520(3) . ?
C6 C7 1.517(3) . ?
C6 C18 1.534(3) . ?
C6 H6 0.9800 . ?
C7 C8 1.545(3) . ?
C7 H26 0.9700 . ?
C7 H25 0.9700 . ?
C8 C21 1.532(3) . ?
C8 C15 1.535(3) . ?
C8 C9 1.542(3) . ?
C9 C10 1.496(2) . ?
C10 C20 1.393(3) . ?
C10 C11 1.396(3) . ?
C11 C12 1.385(3) . ?
C11 H19 0.9300 . ?
C12 C13 1.385(3) . ?
C12 H18 0.9300 . ?
C13 C19 1.390(3) . ?
C13 C14 1.511(3) . ?
C14 H2 0.9600 . ?
C14 H15 0.9600 . ?
C14 H14 0.9600 . ?
C16 C17 1.498(3) . ?
C16 H7 0.9700 . ?
C16 H11 0.9700 . ?
C17 H8 0.9600 . ?
C17 H10 0.9600 . ?
C17 H9 0.9600 . ?
C18 H13 0.9700 . ?
C18 H12 0.9700 . ?
C19 C20 1.388(3) . ?
C19 H16 0.9300 . ?
C20 H17 0.9300 . ?
C22 C23 1.493(4) . ?
C22 H21 0.9700 . ?
C22 H20 0.9700 . ?
C23 H23 0.9600 . ?
C23 H22 0.9600 . ?
C23 H24 0.9600 . ?
C24 C25 1.394(3) . ?
C24 H27 0.9300 . ?
C25 H28 0.9300 . ?
C26 H30 0.9600 . ?
C26 H29 0.9600 . ?
C26 H31 0.9600 . ?
 
loop_
 _geom_angle_atom_site_label_1
 _geom_angle_atom_site_label_2
 _geom_angle_atom_site_label_3
 _geom_angle
 _geom_angle_site_symmetry_1
 _geom_angle_site_symmetry_3
 _geom_angle_publ_flag
C2 O1 C1 116.63(16) . . ?
C15 O3 C16 118.18(15) . . ?
C21 O4 C22 117.10(16) . . ?
C3 O6 C26 117.26(17) . . ?
C9 N1 C18 121.68(16) . . ?
O1 C1 H1 109.5 . . ?
O1 C1 H3 109.5 . . ?
H1 C1 H3 109.5 . . ?
O1 C1 H4 109.5 . . ?
H1 C1 H4 109.5 . . ?
H3 C1 H4 109.5 . . ?
O1 C2 C25 125.46(17) . . ?
O1 C2 C3 115.38(17) . . ?
C25 C2 C3 119.14(17) . . ?
O6 C3 C4 124.91(17) . . ?
O6 C3 C2 115.04(17) . . ?
C4 C3 C2 120.05(18) . . ?
C3 C4 C5 120.99(18) . . ?
C3 C4 H5 119.5 . . ?
C5 C4 H5 119.5 . . ?
C24 C5 C4 118.40(17) . . ?
C24 C5 C6 123.33(17) . . ?
C4 C5 C6 118.24(17) . . ?
C7 C6 C5 113.76(16) . . ?
C7 C6 C18 108.01(16) . . ?
C5 C6 C18 109.30(15) . . ?
C7 C6 H6 108.6 . . ?
C5 C6 H6 108.6 . . ?
C18 C6 H6 108.6 . . ?
C6 C7 C8 109.20(15) . . ?
C6 C7 H26 109.8 . . ?
C8 C7 H26 109.8 . . ?
C6 C7 H25 109.8 . . ?
C8 C7 H25 109.8 . . ?
H26 C7 H25 108.3 . . ?
C21 C8 C15 111.08(15) . . ?
C21 C8 C9 112.73(16) . . ?
C15 C8 C9 107.89(15) . . ?
C21 C8 C7 107.87(16) . . ?
C15 C8 C7 107.40(15) . . ?
C9 C8 C7 109.75(15) . . ?
N1 C9 C10 118.11(16) . . ?
N1 C9 C8 124.45(16) . . ?
C10 C9 C8 117.38(15) . . ?
C20 C10 C11 117.96(17) . . ?
C20 C10 C9 119.69(17) . . ?
C11 C10 C9 122.35(17) . . ?
C12 C11 C10 121.24(19) . . ?
C12 C11 H19 119.4 . . ?
C10 C11 H19 119.4 . . ?
C13 C12 C11 120.86(19) . . ?
C13 C12 H18 119.6 . . ?
C11 C12 H18 119.6 . . ?
C12 C13 C19 117.98(18) . . ?
C12 C13 C14 120.2(2) . . ?
C19 C13 C14 121.8(2) . . ?
C13 C14 H2 109.5 . . ?
C13 C14 H15 109.5 . . ?
H2 C14 H15 109.5 . . ?
C13 C14 H14 109.5 . . ?
H2 C14 H14 109.5 . . ?
H15 C14 H14 109.5 . . ?
O2 C15 O3 124.99(19) . . ?
O2 C15 C8 126.78(19) . . ?
O3 C15 C8 108.21(16) . . ?
O3 C16 C17 110.42(17) . . ?
O3 C16 H7 109.6 . . ?
C17 C16 H7 109.6 . . ?
O3 C16 H11 109.6 . . ?
C17 C16 H11 109.6 . . ?
H7 C16 H11 108.1 . . ?
C16 C17 H8 109.5 . . ?
C16 C17 H10 109.5 . . ?
H8 C17 H10 109.5 . . ?
C16 C17 H9 109.5 . . ?
H8 C17 H9 109.5 . . ?
H10 C17 H9 109.5 . . ?
N1 C18 C6 117.14(15) . . ?
N1 C18 H13 108.0 . . ?
C6 C18 H13 108.0 . . ?
N1 C18 H12 108.0 . . ?
C6 C18 H12 108.0 . . ?
H13 C18 H12 107.3 . . ?
C20 C19 C13 121.65(19) . . ?
C20 C19 H16 119.2 . . ?
C13 C19 H16 119.2 . . ?
C19 C20 C10 120.30(19) . . ?
C19 C20 H17 119.8 . . ?
C10 C20 H17 119.8 . . ?
O5 C21 O4 125.30(19) . . ?
O5 C21 C8 123.84(19) . . ?
O4 C21 C8 110.81(16) . . ?
O4 C22 C23 106.60(18) . . ?
O4 C22 H21 110.4 . . ?
C23 C22 H21 110.4 . . ?
O4 C22 H20 110.4 . . ?
C23 C22 H20 110.4 . . ?
H21 C22 H20 108.6 . . ?
C22 C23 H23 109.5 . . ?
C22 C23 H22 109.5 . . ?
H23 C23 H22 109.5 . . ?
C22 C23 H24 109.5 . . ?
H23 C23 H24 109.5 . . ?
H22 C23 H24 109.5 . . ?
C5 C24 C25 121.32(18) . . ?
C5 C24 H27 119.3 . . ?
C25 C24 H27 119.3 . . ?
C2 C25 C24 120.04(18) . . ?
C2 C25 H28 120.0 . . ?
C24 C25 H28 120.0 . . ?
O6 C26 H30 109.5 . . ?
O6 C26 H29 109.5 . . ?
H30 C26 H29 109.5 . . ?
O6 C26 H31 109.5 . . ?
H30 C26 H31 109.5 . . ?
H29 C26 H31 109.5 . . ?
 
loop_
 _geom_torsion_atom_site_label_1
 _geom_torsion_atom_site_label_2
 _geom_torsion_atom_site_label_3
 _geom_torsion_atom_site_label_4
 _geom_torsion
 _geom_torsion_site_symmetry_1
 _geom_torsion_site_symmetry_2
 _geom_torsion_site_symmetry_3
 _geom_torsion_site_symmetry_4
 _geom_torsion_publ_flag
C1 O1 C2 C25 -0.2(3) . . . . ?
C1 O1 C2 C3 178.59(19) . . . . ?
C26 O6 C3 C4 22.7(3) . . . . ?
C26 O6 C3 C2 -157.5(2) . . . . ?
O1 C2 C3 O6 -0.6(3) . . . . ?
C25 C2 C3 O6 178.24(19) . . . . ?
O1 C2 C3 C4 179.19(18) . . . . ?
C25 C2 C3 C4 -2.0(3) . . . . ?
O6 C3 C4 C5 179.9(2) . . . . ?
C2 C3 C4 C5 0.1(3) . . . . ?
C3 C4 C5 C24 1.6(3) . . . . ?
C3 C4 C5 C6 -176.39(18) . . . . ?
C24 C5 C6 C7 15.8(3) . . . . ?
C4 C5 C6 C7 -166.28(18) . . . . ?
C24 C5 C6 C18 -105.0(2) . . . . ?
C4 C5 C6 C18 72.9(2) . . . . ?
C5 C6 C7 C8 177.16(16) . . . . ?
C18 C6 C7 C8 -61.3(2) . . . . ?
C6 C7 C8 C21 -72.38(19) . . . . ?
C6 C7 C8 C15 167.82(16) . . . . ?
C6 C7 C8 C9 50.8(2) . . . . ?
C18 N1 C9 C10 -179.50(16) . . . . ?
C18 N1 C9 C8 -2.6(3) . . . . ?
C21 C8 C9 N1 101.3(2) . . . . ?
C15 C8 C9 N1 -135.68(18) . . . . ?
C7 C8 C9 N1 -19.0(3) . . . . ?
C21 C8 C9 C10 -81.8(2) . . . . ?
C15 C8 C9 C10 41.3(2) . . . . ?
C7 C8 C9 C10 157.98(16) . . . . ?
N1 C9 C10 C20 31.4(3) . . . . ?
C8 C9 C10 C20 -145.78(18) . . . . ?
N1 C9 C10 C11 -149.72(19) . . . . ?
C8 C9 C10 C11 33.1(3) . . . . ?
C20 C10 C11 C12 -0.7(3) . . . . ?
C9 C10 C11 C12 -179.65(18) . . . . ?
C10 C11 C12 C13 1.0(3) . . . . ?
C11 C12 C13 C19 -0.7(3) . . . . ?
C11 C12 C13 C14 178.3(2) . . . . ?
C16 O3 C15 O2 7.8(3) . . . . ?
C16 O3 C15 C8 -171.12(15) . . . . ?
C21 C8 C15 O2 -3.0(3) . . . . ?
C9 C8 C15 O2 -127.0(2) . . . . ?
C7 C8 C15 O2 114.7(2) . . . . ?
C21 C8 C15 O3 175.83(15) . . . . ?
C9 C8 C15 O3 51.80(19) . . . . ?
C7 C8 C15 O3 -66.44(19) . . . . ?
C15 O3 C16 C17 -96.2(2) . . . . ?
C9 N1 C18 C6 -8.9(3) . . . . ?
C7 C6 C18 N1 41.0(2) . . . . ?
C5 C6 C18 N1 165.28(16) . . . . ?
C12 C13 C19 C20 0.1(3) . . . . ?
C14 C13 C19 C20 -178.9(2) . . . . ?
C13 C19 C20 C10 0.2(3) . . . . ?
C11 C10 C20 C19 0.1(3) . . . . ?
C9 C10 C20 C19 179.08(18) . . . . ?
C22 O4 C21 O5 -3.0(3) . . . . ?
C22 O4 C21 C8 179.58(16) . . . . ?
C15 C8 C21 O5 56.8(3) . . . . ?
C9 C8 C21 O5 178.04(19) . . . . ?
C7 C8 C21 O5 -60.6(2) . . . . ?
C15 C8 C21 O4 -125.75(17) . . . . ?
C9 C8 C21 O4 -4.5(2) . . . . ?
C7 C8 C21 O4 116.81(17) . . . . ?
C21 O4 C22 C23 -165.05(18) . . . . ?
C4 C5 C24 C25 -1.6(3) . . . . ?
C6 C5 C24 C25 176.36(19) . . . . ?
O1 C2 C25 C24 -179.2(2) . . . . ?
C3 C2 C25 C24 2.0(3) . . . . ?
C5 C24 C25 C2 -0.3(3) . . . . ?
 
loop_
 _geom_hbond_atom_site_label_D 
 _geom_hbond_atom_site_label_H 
 _geom_hbond_atom_site_label_A 
 _geom_hbond_distance_DH 
 _geom_hbond_distance_HA 
 _geom_hbond_distance_DA 
 _geom_hbond_angle_DHA 
 _geom_hbond_site_symmetry_A 
C22 H21 O2  0.97 2.52 3.424(3) 154.4 4_575
C23 H22 O1  0.96 2.58 3.336(3) 135.8 4_476
C22 H21 O2  0.97 2.52 3.424(3) 154.4 4_575
C23 H22 O1  0.96 2.58 3.336(3) 135.8 4_476
 
_refine_diff_density_max    0.877
_refine_diff_density_min   -0.298
_refine_diff_density_rms    0.061

_shelxl_version_number 2014-3

_shelx_res_file
;
TITL PB_RD_10_01_119 in P2(1)/c
CELL  0.71073  10.5678  25.3656   8.8316   90.000   94.809   90.000
ZERR     4.00   0.0008   0.0019   0.0008    0.000    0.003    0.000
LATT   1
SYMM  - X, 1/2 + Y, 1/2 - Z
SFAC  C    H    N    O
UNIT  104  124  4    24
MERG   2
EQIV $1 x, -y+3/2, z-1/2
HTAB C22 O2_$1
EQIV $2 x-1, -y+3/2, z+1/2
HTAB C23 O1_$2
HTAB C22 O2_$1
HTAB C23 O1_$2
FMAP   2
PLAN   20
SIZE     0.160   0.200   0.360
ACTA
BOND   $H
CONF
L.S.  10
TEMP    25.00
WGHT    0.055700    2.726400
FVAR       0.16883
O1    4    0.655900    0.639877    0.072169    11.00000    0.01697    0.04792 =
         0.02101    0.01267    0.00620    0.00915
O2    4    0.063579    0.640151    0.864047    11.00000    0.03437    0.03181 =
         0.01492   -0.00634    0.00238    0.00558
O3    4    0.105339    0.564227    0.744626    11.00000    0.03435    0.02297 =
         0.01576    0.00206    0.00404    0.00596
O4    4   -0.070276    0.703865    0.487028    11.00000    0.02509    0.01709 =
         0.02710    0.00038    0.00690    0.00183
O5    4    0.088360    0.729895    0.656363    11.00000    0.04822    0.02294 =
         0.03540   -0.00506   -0.00692   -0.00780
O6    4    0.455409    0.680415   -0.066172    11.00000    0.02459    0.05490 =
         0.02174    0.02185    0.00583    0.01076
N1    3   -0.002437    0.586309    0.357367    11.00000    0.01423    0.01940 =
         0.01428   -0.00041    0.00067    0.00046
C1    1    0.769580    0.619021    0.147454    11.00000    0.01760    0.03495 =
         0.02985    0.00573    0.00428    0.00776
AFIX 137
H1    2    0.794860    0.640259    0.234763    11.00000   -1.50000
H3    2    0.835618    0.619250    0.079145    11.00000   -1.50000
H4    2    0.754835    0.583506    0.179165    11.00000   -1.50000
AFIX   0
C2    1    0.551188    0.640208    0.152578    11.00000    0.01586    0.02394 =
         0.01895    0.00389    0.00444    0.00158
C3    1    0.441071    0.662144    0.076646    11.00000    0.01931    0.02432 =
         0.01587    0.00602    0.00195    0.00171
C4    1    0.329588    0.663799    0.147052    11.00000    0.01616    0.02258 =
         0.01734    0.00194    0.00001    0.00172
AFIX  43
H5    2    0.257253    0.678302    0.096038    11.00000   -1.20000
AFIX   0
C5    1    0.323610    0.644018    0.293901    11.00000    0.01767    0.02207 =
         0.01558   -0.00208    0.00286   -0.00258
C6    1    0.195874    0.644086    0.361141    11.00000    0.01776    0.02543 =
         0.01545    0.00137    0.00344    0.00088
AFIX  13
H6    2    0.155318    0.678390    0.340719    11.00000   -1.20000
AFIX   0
C7    1    0.204813    0.634247    0.531119    11.00000    0.01709    0.02527 =
         0.01629   -0.00014    0.00134   -0.00023
AFIX  23
H26   2    0.260259    0.660212    0.582844    11.00000   -1.20000
H25   2    0.240257    0.599547    0.553221    11.00000   -1.20000
AFIX   0
C8    1    0.070801    0.637984    0.587956    11.00000    0.01745    0.02306 =
         0.01180   -0.00381    0.00308   -0.00178
C9    1   -0.022120    0.602932    0.488876    11.00000    0.01387    0.01546 =
         0.01347    0.00065    0.00020    0.00080
C10   1   -0.140411    0.585382    0.556150    11.00000    0.01498    0.02140 =
         0.01177    0.00310    0.00039    0.00122
C11   1   -0.201989    0.616649    0.657305    11.00000    0.02172    0.02295 =
         0.01764   -0.00222    0.00415   -0.00239
AFIX  43
H19   2   -0.169180    0.649699    0.684003    11.00000   -1.20000
AFIX   0
C12   1   -0.311061    0.599379    0.718685    11.00000    0.02194    0.02936 =
         0.01887   -0.00112    0.00667   -0.00004
AFIX  43
H18   2   -0.351048    0.621192    0.784606    11.00000   -1.20000
AFIX   0
C13   1   -0.361329    0.550059    0.683164    11.00000    0.01821    0.03042 =
         0.01940    0.00705    0.00110   -0.00330
C14   1   -0.478261    0.531201    0.754527    11.00000    0.02489    0.04376 =
         0.03364    0.00670    0.00782   -0.00810
AFIX 137
H2    2   -0.493689    0.494871    0.728709    11.00000   -1.50000
H15   2   -0.550072    0.552034    0.717258    11.00000   -1.50000
H14   2   -0.465305    0.534720    0.862948    11.00000   -1.50000
AFIX   0
C15   1    0.079239    0.616136    0.750562    11.00000    0.01632    0.02648 =
         0.01617   -0.00177    0.00005    0.00212
C16   1    0.099466    0.533066    0.883267    11.00000    0.02686    0.02355 =
         0.01884    0.00516    0.00514   -0.00008
AFIX  23
H7    2    0.065410    0.498393    0.857561    11.00000   -1.20000
H11   2    0.043175    0.550106    0.949473    11.00000   -1.20000
AFIX   0
C17   1    0.229057    0.527629    0.964422    11.00000    0.03564    0.03556 =
         0.02411    0.00285    0.00020    0.00310
AFIX 137
H8    2    0.285151    0.511502    0.897961    11.00000   -1.50000
H10   2    0.224199    0.506042    1.053031    11.00000   -1.50000
H9    2    0.260877    0.561858    0.994286    11.00000   -1.50000
AFIX   0
C18   1    0.111021    0.601142    0.283832    11.00000    0.01645    0.02573 =
         0.01186   -0.00144    0.00320    0.00011
AFIX  23
H13   2    0.084483    0.612871    0.181535    11.00000   -1.20000
H12   2    0.162280    0.569745    0.274984    11.00000   -1.20000
AFIX   0
C19   1   -0.299794    0.518763    0.583065    11.00000    0.02349    0.02099 =
         0.02533    0.00326    0.00029   -0.00501
AFIX  43
H16   2   -0.332233    0.485532    0.557833    11.00000   -1.20000
AFIX   0
C20   1   -0.191164    0.535851    0.519814    11.00000    0.02126    0.01963 =
         0.02079    0.00040    0.00282    0.00053
AFIX  43
H17   2   -0.152061    0.514135    0.452852    11.00000   -1.20000
AFIX   0
C21   1    0.031612    0.696139    0.584711    11.00000    0.02438    0.02184 =
         0.01547   -0.00078    0.00623   -0.00420
C22   1   -0.119161    0.757284    0.472448    11.00000    0.04166    0.01642 =
         0.03270    0.00451    0.01051    0.00534
AFIX  23
H21   2   -0.064746    0.778757    0.414267    11.00000   -1.20000
H20   2   -0.123115    0.773140    0.571887    11.00000   -1.20000
AFIX   0
C23   1   -0.249012    0.753360    0.392392    11.00000    0.04446    0.02930 =
         0.04634    0.00597    0.01018    0.01742
AFIX 137
H23   2   -0.243247    0.739014    0.292617    11.00000   -1.50000
H22   2   -0.286625    0.787800    0.384179    11.00000   -1.50000
H24   2   -0.300636    0.730744    0.448916    11.00000   -1.50000
AFIX   0
C24   1    0.433054    0.623933    0.368721    11.00000    0.02315    0.02877 =
         0.01371    0.00584    0.00335   -0.00110
AFIX  43
H27   2    0.430971    0.611430    0.467472    11.00000   -1.20000
AFIX   0
C25   1    0.546662    0.622018    0.299202    11.00000    0.01586    0.02748 =
         0.01962    0.00670   -0.00043    0.00186
AFIX  43
H28   2    0.619428    0.608467    0.351732    11.00000   -1.20000
AFIX   0
C26   1    0.368074    0.718800   -0.125575    11.00000    0.04353    0.03921 =
         0.02261    0.01411   -0.00512    0.00622
AFIX 137
H30   2    0.285779    0.703006   -0.145201    11.00000   -1.50000
H29   2    0.395663    0.732607   -0.218520    11.00000   -1.50000
H31   2    0.363403    0.746884   -0.053388    11.00000   -1.50000
AFIX   0
HKLF    4  1.0  1.00  0.00  0.00  0.00  1.00  0.00  0.00  0.00  1.00

REM  PB_RD_10_01_119 in P2(1)/c
REM R1 =  0.0636 for    4585 Fo > 4sig(Fo)  and  0.0877 for all    5881 data
REM    303 parameters refined using      0 restraints

END

WGHT      0.0557      2.7267

REM Highest difference peak  0.877,  deepest hole -0.298,  1-sigma level  0.061
Q1    1   0.1694  0.5898  0.7146  11.00000  0.05    0.88
Q2    1   0.1748  0.6673  0.4718  11.00000  0.05    0.60
Q3    1   0.0029  0.7435  0.6473  11.00000  0.05    0.57
Q4    1   0.1989  0.5638  0.8613  11.00000  0.05    0.52
Q5    1   0.2213  0.6126  0.4014  11.00000  0.05    0.40
Q6    1   0.0247  0.6218  0.5422  11.00000  0.05    0.38
Q7    1   0.1045  0.6387  0.6958  11.00000  0.05    0.35
Q8    1   0.3588  0.6205  0.3154  11.00000  0.05    0.35
Q9    1   0.0485  0.6625  0.5668  11.00000  0.05    0.34
Q10   1   0.0634  0.6292  0.6628  11.00000  0.05    0.32
Q11   1  -0.0839  0.5911  0.5302  11.00000  0.05    0.32
Q12   1   0.2039  0.6313  0.4385  11.00000  0.05    0.30
Q13   1   0.4862  0.6419  0.1115  11.00000  0.05    0.30
Q14   1  -0.5499  0.5185  0.6752  11.00000  0.05    0.29
Q15   1  -0.0351  0.7101  0.5604  11.00000  0.05    0.26
Q16   1  -0.4132  0.5387  0.7230  11.00000  0.05    0.26
Q17   1   0.4826  0.6108  0.3291  11.00000  0.05    0.25
Q18   1   0.5412  0.6328  0.2198  11.00000  0.05    0.25
Q19   1   0.4998  0.6659  0.1251  11.00000  0.05    0.25
Q20   1  -0.4520  0.5019  0.8178  11.00000  0.05    0.25
;
_shelx_res_checksum   56523

_shelx_hkl_file
;
   0   0   1    0.07    0.05
   0   0   1   -0.01    0.04
   0   0  -1   -0.03    0.04
   0   0  -1    0.01    0.05
   0   0  -2    8.62    0.41
   0   0  -2    9.17    0.39
   0   0   2    9.12    0.42
   0   0  -2    8.99    0.44
   0   0   3    0.00    0.15
   0   0   3   -0.10    0.13
   0   0  -3    0.00    0.14
   0   0  -3   -0.09    0.13
   0   0  -3   -0.03    0.12
   0   0  -4   46.46    1.58
   0   0  -4   48.91    1.66
   0   0   4   45.73    1.65
   0   0   4   48.59    1.69
   0   0  -4   46.85    1.67
   0   0   5    0.20    0.23
   0   0  -5    0.23    0.23
   0   0   5   -0.20    0.23
   0   0  -5   -0.12    0.18
   0   0  -5   -0.09    0.24
   0   0  -6    0.04    0.34
   0   0  -6   -0.04    0.26
   0   0   6   -0.06    0.33
   0   0  -6    0.06    0.26
   0   0   6    0.39    0.28
   0   0  -7   -0.22    0.37
   0   0   7    0.03    0.33
   0   0   7   -0.28    0.42
   0   0  -7   -0.23    0.37
   0   0  -7   -0.22    0.36
   0   0  -8   12.03    1.07
   0   0   8   12.05    1.14
   0   0  -8   10.55    0.97
   0   0  -8   10.67    0.87
   0   0   8    9.90    0.96
   0   0  -9   -0.57    0.50
   0   0   9    0.05    0.66
   0   0  -9   -0.59    0.54
   0   0  -9    0.28    0.58
   0   0 -10   14.23    1.43
   0   0  10   12.47    1.53
   0   0  10   17.33    1.59
   0   0 -10   13.44    1.26
   0   0  11   -0.91    0.94
   0   0  11    1.46    1.02
   0   0 -11    0.06    0.80
   0   1  -1  107.77    2.96
   0   1   1  103.12    3.00
   0   1   1  104.29    3.00
   0   1  -1  105.93    3.01
   0   1  -1  102.03    3.01
   0   1   1  108.93    3.02
   0  -1   1  104.01    3.01
   0  -1  -1  105.98    3.01
   0  -1  -1  102.65    3.00
   0  -1  -1  106.19    2.99
   0  -1   1  106.40    3.02
   0   1   2   -0.13    0.09
   0   1  -2    0.06    0.10
   0   1   2   -0.08    0.11
   0   1  -2   -0.11    0.15
   0   1   2    0.02    0.12
   0   1  -2   -0.11    0.10
   0  -1  -2   -0.13    0.10
   0  -1  -2    0.00    0.13
   0  -1   2   -0.17    0.10
   0  -1  -2   -0.09    0.09
   0   1  -3    1.50    0.25
   0   1  -3    1.51    0.21
   0   1  -3    1.64    0.26
   0   1   3    1.40    0.24
   0   1   3    1.78    0.24
   0  -1  -3    1.33    0.23
   0  -1  -3    1.38    0.23
   0  -1   3    1.39    0.24
   0  -1  -3    1.36    0.24
   0  -1   3    1.58    0.26
   0   1   4    2.99    0.39
   0   1   4    3.41    0.37
   0   1  -4    3.40    0.34
   0   1  -4    2.67    0.41
   0   1  -4    3.47    0.36
   0  -1   4    3.25    0.42
   0  -1  -4    3.57    0.37
   0  -1   4    2.76    0.38
   0  -1  -4    3.38    0.38
   0  -1  -4    3.37    0.36
   0   1  -5  102.82    3.27
   0   1  -5   97.55    3.22
   0   1  -5  100.33    3.10
   0   1   5   98.49    3.21
   0   1   5  104.35    3.27
   0  -1  -5   99.41    3.21
   0  -1   5   95.60    3.22
   0  -1  -5  102.67    3.26
   0  -1  -5  102.35    3.16
   0  -1   5  103.15    3.28
   0   1  -6    0.36    0.30
   0   1   6    0.16    0.30
   0   1  -6    0.25    0.27
   0   1  -6   -0.13    0.29
   0   1   6    0.19    0.34
   0  -1  -6    0.80    0.35
   0  -1   6    0.02    0.36
   0  -1  -6    0.55    0.32
   0  -1   6    0.44    0.31
   0  -1  -6    0.30    0.31
   0   1   7    4.18    0.64
   0   1  -7    3.75    0.62
   0   1  -7    3.45    0.58
   0   1  -7    4.26    0.63
   0   1   7    3.97    0.64
   0  -1   7    3.39    0.59
   0  -1  -7    4.95    0.71
   0  -1  -7    4.48    0.61
   0  -1  -7    3.52    0.62
   0  -1   7    3.62    0.66
   0   1  -8   -0.24    0.44
   0   1  -8   -0.46    0.43
   0   1   8    0.12    0.50
   0   1   8   -0.12    0.44
   0   1  -8    0.26    0.38
   0  -1   8    0.46    0.52
   0  -1  -8    0.25    0.47
   0  -1  -8   -0.35    0.44
   0  -1   8    0.16    0.52
   0  -1  -8    0.41    0.48
   0   1  -9    5.25    0.87
   0   1  -9    3.61    0.75
   0   1  -9    4.70    0.70
   0   1   9    5.19    0.97
   0  -1  -9    4.99    0.85
   0  -1  -9    4.61    0.73
   0  -1   9    6.10    1.03
   0  -1  -9    3.77    0.76
   0   1  10   28.52    1.98
   0   1 -10   29.21    1.87
   0   1  10   28.77    1.91
   0   1 -10   26.62    1.54
   0  -1 -10   30.05    1.84
   0  -1  10   29.70    1.89
   0  -1 -10   28.09    1.70
   0   1 -11   -0.39    0.85
   0   1  11   -0.67    0.87
   0   1  11    0.40    1.00
   0  -1 -11    0.24    0.85
   0  -1  11    0.27    1.01
   0  -1  11    0.96    1.09
   0   2   1    0.78    0.09
   0   2   1    0.77    0.09
   0   2   1    0.80    0.11
   0   2  -1    0.70    0.10
   0   2  -1    0.56    0.11
   0   2   1    0.63    0.10
   0  -2   1    0.67    0.11
   0  -2  -1    0.83    0.09
   0  -2  -1    0.65    0.09
   0  -2   1    0.65    0.10
   0  -2  -1    0.69    0.12
   0   2   2  103.20    3.00
   0   2   2  100.47    2.99
   0   2  -2  100.78    2.91
   0   2  -2  103.82    3.03
   0  -2  -2  100.38    3.00
   0  -2   2  108.17    3.05
   0  -2  -2  102.65    2.99
   0  -2  -2  102.21    3.03
   0  -2   2   99.42    3.02
   0   2  -3    0.24    0.17
   0   2   3    0.29    0.15
   0   2  -3    0.41    0.14
   0   2   3    0.52    0.17
   0   2  -3    0.48    0.19
   0   2   3    0.54    0.20
   0  -2  -3    0.70    0.21
   0  -2  -3    0.34    0.15
   0  -2   3    0.59    0.20
   0  -2  -3    0.39    0.17
   0  -2   3    0.46    0.17
   0   2  -4   89.45    2.79
   0   2  -4   95.35    2.97
   0   2   4   94.37    2.92
   0   2  -4   93.68    2.95
   0   2   4   97.64    2.95
   0  -2  -4   91.93    2.93
   0  -2  -4   92.36    2.90
   0  -2   4   92.92    2.97
   0  -2  -4   92.32    2.90
   0  -2   4   90.61    2.93
   0   2  -5   99.66    3.08
   0   2   5  103.99    3.27
   0   2  -5  104.34    3.30
   0   2   5   98.97    3.21
   0   2  -5  100.84    3.25
   0  -2  -5  100.83    3.19
   0  -2   5   95.46    3.28
   0  -2   5  104.51    3.30
   0  -2  -5  101.14    3.26
   0  -2  -5   99.54    3.21
   0   2  -6    6.35    0.51
   0   2   6    4.64    0.62
   0   2   6    4.60    0.55
   0   2  -6    5.06    0.60
   0   2  -6    5.91    0.68
   0  -2  -6    5.50    0.60
   0  -2   6    5.76    0.72
   0  -2  -6    4.69    0.58
   0  -2   6    5.66    0.62
   0   2   7    6.85    0.79
   0   2  -7    6.02    0.72
   0   2  -7    6.37    0.64
   0   2   7    7.39    0.72
   0   2  -7    6.13    0.81
   0  -2  -7    6.65    0.71
   0  -2  -7    6.44    0.75
   0  -2   7    5.30    0.73
   0  -2   7    8.37    0.89
   0  -2  -7    6.95    0.69
   0   2  -8    0.89    0.50
   0   2   8    0.56    0.55
   0   2   8    0.24    0.47
   0   2  -8    0.24    0.48
   0  -2   8    0.64    0.45
   0  -2   8   -0.39    0.54
   0  -2  -8    0.39    0.47
   0  -2  -8    0.12    0.52
   0  -2  -8   -0.87    0.41
   0   2  -9    1.31    0.65
   0   2  -9    0.29    0.52
   0   2   9    0.40    0.59
   0   2  -9   -0.03    0.60
   0   2   9    1.42    0.74
   0  -2  -9   -0.04    0.55
   0  -2  -9    0.72    0.58
   0  -2   9    1.68    1.18
   0  -2  -9    1.22    0.58
   0   2  10    0.54    0.76
   0   2 -10    0.82    0.75
   0   2  10    1.94    0.80
   0  -2 -10    0.51    0.79
   0  -2 -10    2.21    0.82
   0  -2 -10    0.10    0.70
   0  -2  10    2.02    0.86
   0   2  11    3.58    1.10
   0   2 -11    2.80    1.01
   0   2  11    1.41    0.99
   0  -2  11    2.29    1.07
   0  -2  11    3.83    1.21
   0  -2 -11    3.35    0.96
   0   3   0    0.04    0.05
   0   3   0    0.08    0.03
   0   3   0    0.02    0.03
   0   3   0    0.05    0.04
   0   3   0    0.14    0.06
   0  -3   0    0.02    0.03
   0  -3   0    0.00    0.05
   0  -3   0    0.01    0.04
   0   3  -1    1.24    0.14
   0   3   1    1.25    0.10
   0   3   1    1.25    0.14
   0   3   1    1.25    0.10
   0   3   1    1.32    0.16
   0   3  -1    1.04    0.14
   0  -3  -1    1.29    0.16
   0  -3  -1    1.39    0.15
   0  -3   1    1.02    0.14
   0  -3  -1    1.22    0.10
   0  -3   1    1.24    0.13
   0  -3  -1    1.27    0.09
   0   3   2   25.90    0.92
   0   3   2   24.15    0.83
   0   3   2   24.22    0.90
   0   3   2   23.94    0.84
   0   3  -2   25.00    0.89
   0   3  -2   24.77    0.74
   0  -3   2   24.24    0.88
   0  -3  -2   24.48    0.90
   0  -3   2   23.99    0.89
   0  -3  -2   24.97    0.83
   0  -3  -2   24.59    0.85
   0   3  -3    5.50    0.28
   0   3   3    5.78    0.39
   0   3   3    5.41    0.42
   0   3  -3    5.99    0.43
   0   3   3    5.40    0.36
   0   3  -3    5.28    0.39
   0  -3  -3    5.60    0.35
   0  -3  -3    5.36    0.38
   0  -3   3    4.74    0.38
   0  -3  -3    6.08    0.42
   0  -3   3    5.45    0.42
   0   3   4   80.42    2.54
   0   3   4   81.63    2.57
   0   3  -4   76.98    2.39
   0   3  -4   80.68    2.61
   0   3  -4   77.21    2.57
   0  -3  -4   82.33    2.58
   0  -3   4   79.77    2.61
   0  -3   4   78.10    2.58
   0  -3  -4   80.40    2.57
   0  -3  -4   81.58    2.54
   0   3   5   56.08    1.98
   0   3   5   54.37    1.93
   0   3  -5   57.55    2.04
   0   3  -5   55.52    1.78
   0  -3  -5   53.94    1.97
   0  -3   5   55.32    2.02
   0  -3  -5   55.29    1.95
   0  -3  -5   53.82    1.92
   0   3  -6   30.26    1.38
   0   3   6   27.83    1.26
   0   3   6   30.31    1.36
   0   3  -6   27.88    1.11
   0  -3  -6   28.96    1.32
   0  -3  -6   29.26    1.26
   0  -3   6   28.58    1.38
   0  -3   6   26.63    1.30
   0   3  -7    1.07    0.39
   0   3  -7    0.97    0.42
   0   3   7    0.44    0.37
   0   3  -7    1.16    0.50
   0   3   7    1.20    0.46
   0  -3  -7    0.59    0.37
   0  -3   7    1.08    0.51
   0  -3  -7    0.96    0.42
   0  -3   7    1.01    0.48
   0  -3  -7    0.91    0.45
   0   3  -8   -0.11    0.48
   0   3   8   -0.59    0.49
   0   3  -8    0.61    0.41
   0   3   8    0.29    0.46
   0   3   8    0.34    0.62
   0  -3  -8   -0.41    0.41
   0  -3  -8    0.58    0.51
   0  -3   8    0.67    0.56
   0  -3  -8   -0.16    0.50
   0  -3   8    0.23    0.44
   0   3   9   11.77    1.28
   0   3  -9   11.36    1.38
   0   3   9   13.50    1.29
   0   3  -9   14.85    1.28
   0   3  -9   10.61    0.93
   0  -3  -9   12.55    1.13
   0  -3  -9   10.60    1.65
   0  -3  -9   11.71    1.16
   0  -3   9   12.75    1.25
   0   3  10    3.12    0.94
   0   3 -10    2.61    0.85
   0   3  10    4.68    0.95
   0  -3 -10    3.39    0.84
   0  -3  10    2.82    0.92
   0  -3 -10    3.12    0.80
   0   3  11   -0.12    0.85
   0   3 -11   -0.88    0.91
   0   3  11    0.01    1.06
   0  -3 -11    1.48    0.88
   0  -3  11    0.14    0.91
   0  -3  11    0.15    1.02
   0   4   0  815.58   23.12
   0   4   0  850.63   23.02
   0   4   0  794.42   22.78
   0   4   0  813.77   22.89
   0   4   0  798.37   23.09
   0  -4   0  810.10   22.87
   0  -4   0  815.76   22.77
   0  -4   0  843.79   23.01
   0  -4   0  798.53   23.05
   0  -4   0  810.19   23.08
   0  -4   0  795.53   22.80
   0   4   1  105.06    2.97
   0   4  -1  104.06    2.99
   0   4   1  101.70    2.93
   0   4  -1  104.50    2.99
   0   4  -1  102.24    2.90
   0   4   1   95.33    3.10
   0  -4  -1  102.27    2.93
   0  -4   1  104.40    2.99
   0  -4   1  101.76    2.98
   0  -4  -1  104.96    2.98
   0  -4  -1  106.95    3.04
   0  -4  -1  105.13    2.92
   0   4   2  175.83    5.07
   0   4   2  168.99    4.98
   0   4   2  176.69    5.03
   0   4  -2  174.50    5.04
   0   4   2  169.56    4.97
   0  -4   2  174.65    5.05
   0  -4  -2  179.19    5.08
   0  -4  -2  169.90    4.96
   0  -4   2  173.38    5.03
   0  -4  -2  179.14    4.99
   0   4  -3   37.26    1.33
   0   4  -3   36.66    1.13
   0   4   3   37.32    1.27
   0   4   3   38.29    1.35
   0   4   3   37.22    1.33
   0   4  -3   37.10    1.34
   0  -4   3   37.45    1.34
   0  -4  -3   37.60    1.34
   0  -4  -3   37.64    1.28
   0  -4  -3   36.71    1.25
   0  -4   3   38.15    1.44
   0   4   4   22.29    0.91
   0   4  -4   21.61    0.77
   0   4  -4   22.03    0.97
   0   4  -4   22.98    1.01
   0   4   4   23.02    0.95
   0  -4   4   22.06    0.98
   0  -4  -4   22.81    0.91
   0  -4  -4   21.52    0.98
   0  -4  -4   22.10    0.94
   0  -4   4   22.41    1.00
   0   4  -5   40.06    1.59
   0   4   5   42.48    1.58
   0   4   5   40.24    1.53
   0   4  -5   44.12    1.65
   0   4  -5   40.41    1.36
   0  -4  -5   41.88    1.59
   0  -4   5   40.56    1.63
   0  -4  -5   41.15    1.57
   0  -4  -5   39.63    1.51
   0   4   6    0.67    0.29
   0   4  -6    1.27    0.35
   0   4  -6    0.51    0.42
   0   4   6    0.72    0.39
   0   4  -6    2.15    0.38
   0  -4   6    1.45    0.47
   0  -4  -6    0.49    0.34
   0  -4  -6    1.23    0.32
   0  -4   6    0.87    0.34
   0  -4  -6    1.27    0.42
   0   4   7   -0.16    0.42
   0   4   7    0.30    0.35
   0   4  -7   -0.11    0.28
   0   4  -7   -0.18    0.39
   0   4   7    0.21    0.53
   0   4  -7   -0.09    0.37
   0  -4   7    0.30    0.47
   0  -4   7    0.02    0.38
   0  -4  -7   -0.05    0.35
   0  -4  -7    0.88    0.46
   0  -4  -7   -0.08    0.32
   0   4   8   -0.18    0.81
   0   4  -8    0.50    0.50
   0   4  -8    0.10    0.35
   0   4   8    0.50    0.53
   0   4  -8   -0.41    0.50
   0   4   8    0.05    0.46
   0  -4  -8   -0.69    0.54
   0  -4   8   -0.43    0.49
   0  -4  -8   -0.03    0.44
   0  -4  -8   -0.45    0.71
   0  -4   8   -0.18    0.59
   0   4  -9    3.11    0.57
   0   4   9    4.47    0.85
   0   4   9    4.16    0.89
   0   4  -9    2.67    0.78
   0   4  -9    2.86    0.76
   0  -4  -9    3.29    0.76
   0  -4  -9    3.33    0.75
   0  -4   9    4.12    0.84
   0  -4  -9    3.34    0.73
   0   4 -10    5.69    1.03
   0   4  10    7.33    1.14
   0   4  10    5.63    1.04
   0  -4 -10    5.06    0.91
   0  -4  10    6.06    1.09
   0  -4 -10    5.18    0.93
   0  -4 -10    7.11    1.18
   0   4 -11    0.45    0.97
   0   4  11    0.79    0.98
   0   4  11    0.79    1.04
   0  -4 -11    2.96    0.96
   0  -4  11    2.54    1.12
   0   5   0    0.15    0.08
   0   5   0    0.08    0.10
   0   5   0    0.14    0.07
   0   5   0    0.01    0.07
   0  -5   0   -0.02    0.09
   0  -5   0    0.01    0.06
   0  -5   0    0.37    0.11
   0   5  -1  144.54    4.04
   0   5  -1  142.90    4.02
   0   5   1  138.06    4.01
   0   5   1  140.58    4.06
   0   5  -1  146.64    4.08
   0   5   1  144.86    4.18
   0   5  -1  144.05    4.09
   0   5  -1  143.32    4.09
   0  -5  -1  149.74    4.05
   0  -5  -1  143.87    4.10
   0  -5  -1  139.56    4.07
   0  -5  -1  137.32    4.02
   0  -5   1  138.44    4.08
   0  -5  -1  141.84    4.15
   0   5   2   60.43    1.89
   0   5   2   61.19    1.83
   0   5  -2   60.96    1.91
   0   5   2   61.68    1.96
   0   5   2   59.04    1.83
   0  -5  -2   60.73    1.96
   0  -5   2   60.05    1.90
   0  -5  -2   61.41    1.84
   0  -5  -2   60.81    1.81
   0  -5   2   61.22    1.92
   0   5   3   51.14    1.74
   0   5  -3   51.70    1.47
   0   5   3   47.23    1.66
   0   5   3   49.31    1.63
   0   5   3   49.62    1.69
   0   5  -3   52.54    1.71
   0  -5   3   51.87    1.74
   0  -5  -3   51.85    1.74
   0  -5  -3   51.22    1.62
   0  -5  -3   50.14    1.65
   0  -5   3   52.05    1.72
   0   5  -4  131.22    3.88
   0   5  -4  138.24    4.18
   0   5   4  142.49    4.12
   0   5   4  135.45    4.08
   0   5   4  135.93    4.18
   0   5   4  133.22    4.14
   0   5  -4  135.57    4.16
   0  -5   4  132.68    4.14
   0  -5  -4  135.83    4.17
   0  -5  -4  138.15    4.11
   0  -5   4  135.52    4.18
   0  -5  -4  134.46    4.05
   0   5  -5    3.39    0.52
   0   5  -5    3.40    0.30
   0   5   5    3.47    0.46
   0   5  -5    4.39    0.49
   0   5   5    3.15    0.41
   0   5   5    3.53    0.54
   0  -5  -5    3.76    0.55
   0  -5  -5    2.98    0.40
   0  -5   5    3.98    0.55
   0  -5  -5    3.36    0.43
   0   5  -6    1.28    0.38
   0   5  -6    2.17    0.33
   0   5   6    1.80    0.37
   0   5   6    1.92    0.42
   0   5  -6    1.97    0.46
   0   5   6    2.32    0.57
   0  -5  -6    2.25    0.52
   0  -5  -6    1.82    0.38
   0  -5  -6    2.22    0.45
   0  -5   6    2.20    0.51
   0  -5   6    1.79    0.45
   0   5   7    4.86    0.72
   0   5   7    2.57    0.65
   0   5  -7    3.37    0.61
   0   5  -7    3.82    0.45
   0   5   7    2.64    0.51
   0   5  -7    3.34    0.62
   0  -5   7    4.09    0.67
   0  -5   7    3.34    0.62
   0  -5  -7    4.25    0.67
   0  -5  -7    4.25    0.64
   0  -5  -7    4.04    0.69
   0   5   8   -0.14    0.49
   0   5  -8    0.20    0.49
   0   5  -8    0.32    0.52
   0   5  -8    0.51    0.34
   0   5   8    0.51    0.45
   0  -5  -8    1.11    0.48
   0  -5   8    0.46    0.54
   0  -5   8    0.16    0.54
   0  -5  -8   -0.01    0.54
   0   5  -9    2.59    0.81
   0   5   9    1.53    0.69
   0   5   9    2.35    0.71
   0  -5   9    3.40    0.86
   0  -5  -9    2.87    0.73
   0   5  10    0.88    1.38
   0   5  10    1.30    0.80
   0   5 -10   -0.20    0.72
   0  -5 -10    1.10    0.98
   0  -5 -10    2.09    0.81
   0   5  11    9.43    1.43
   0   5 -11   11.55    1.74
   0   5  11   10.27    1.49
   0  -5  11   13.48    1.89
   0  -5 -11   13.39    1.51
   0   6   0    0.73    0.17
   0   6   0    0.90    0.13
   0   6   0    0.59    0.14
   0  -6   0    0.67    0.12
   0  -6   0    0.65    0.15
   0  -6   0    1.12    0.17
   0  -6   0    0.92    0.16
   0  -6   0    0.76    0.12
   0  -6   0    0.82    0.17
   0   6  -1  645.69   18.76
   0   6   1  655.42   18.71
   0   6   1  767.77   20.15
   0   6  -1  650.10   18.81
   0   6   1  589.75   19.18
   0   6   1  691.28   19.19
   0   6  -1  642.53   18.87
   0   6  -1  692.36   19.08
   0   6  -1  665.38   18.74
   0   6  -1  658.80   18.91
   0  -6  -1  663.18   18.68
   0  -6  -1  666.33   18.94
   0  -6  -1  693.86   19.00
   0  -6  -1  687.53   19.26
   0  -6   1  643.14   18.92
   0  -6   1  659.82   18.70
   0  -6  -1  629.56   18.80
   0  -6  -1  645.73   18.93
   0  -6   1  678.60   18.80
   0   6   2   99.22    2.98
   0   6   2  100.03    2.97
   0   6   2  102.83    3.04
   0   6   2  104.10    3.14
   0   6  -2  102.66    3.06
   0  -6   2  104.37    3.07
   0  -6  -2  101.55    2.98
   0  -6  -2  102.65    3.06
   0  -6   2  101.40    3.06
   0  -6  -2  101.11    2.95
   0  -6  -2  104.23    3.13
   0   6  -3   53.26    1.77
   0   6   3   51.62    1.69
   0   6   3   52.45    1.75
   0   6  -3   55.15    1.79
   0   6   3   50.59    1.67
   0   6   3   52.68    1.82
   0  -6  -3   51.82    1.81
   0  -6   3   52.86    1.78
   0  -6  -3   52.22    1.65
   0  -6  -3   52.47    1.70
   0  -6   3   51.58    1.76
   0   6  -4   61.93    1.86
   0   6  -4   64.87    2.19
   0   6   4   66.76    2.23
   0   6   4   64.46    2.16
   0   6   4   64.26    2.07
   0   6   4   64.79    2.11
   0   6  -4   65.17    2.18
   0  -6  -4   63.42    2.11
   0  -6  -4   62.73    2.04
   0  -6   4   64.15    2.20
   0  -6  -4   64.57    2.21
   0  -6   4   59.95    2.14
   0   6   5    0.81    0.29
   0   6   5    0.55    0.22
   0   6   5    0.79    0.35
   0   6  -5    0.84    0.18
   0   6  -5    0.97    0.36
   0   6  -5    0.98    0.31
   0  -6  -5    0.68    0.27
   0  -6  -5    1.22    0.38
   0  -6   5    0.77    0.32
   0  -6   5    0.99    0.38
   0  -6  -5    0.69    0.24
   0   6   6   10.42    0.72
   0   6   6   10.61    0.90
   0   6  -6    9.68    0.52
   0   6   6   11.43    0.80
   0   6  -6   11.45    0.90
   0   6  -6   11.75    0.81
   0  -6  -6   10.77    0.86
   0  -6   6   10.59    0.84
   0  -6  -6   11.82    0.81
   0  -6   6   11.79    0.92
   0  -6  -6   11.49    0.72
   0   6   7    0.52    0.34
   0   6  -7    0.20    0.43
   0   6   7   -0.09    0.46
   0   6  -7   -0.10    0.38
   0   6  -7    0.60    0.27
   0   6   7   -0.21    0.37
   0  -6  -7    0.06    0.47
   0  -6   7   -0.15    0.48
   0  -6  -7   -0.19    0.33
   0  -6   7   -0.71    0.38
   0  -6  -7   -0.11    0.35
   0   6  -8    7.57    0.99
   0   6   8    6.54    1.05
   0   6  -8    7.60    0.95
   0   6   8    7.84    0.95
   0   6   8    8.30    0.97
   0  -6  -8    7.43    0.81
   0  -6   8    9.67    0.98
   0  -6   8    8.20    1.06
   0  -6  -8    6.81    1.01
   0  -6  -8    7.39    1.01
   0   6   9    0.18    0.65
   0   6  -9    0.22    0.65
   0   6   9    0.24    0.65
   0  -6  -9   -0.13    0.54
   0  -6  -9    0.75    0.57
   0  -6  -9    0.97    0.66
   0   6  10    1.18    1.06
   0   6 -10    1.00    0.85
   0   6  10    0.52    0.77
   0  -6 -10    0.45    0.67
   0  -6 -10    0.36    0.81
   0  -6  10    0.70    0.87
   0  -6 -10    2.24    0.95
   0   6 -11    0.33    1.02
   0   6  11   -0.35    1.01
   0   6  11    0.12    1.04
   0  -6  11   -0.94    1.08
   0  -6 -11    0.18    0.88
   0   7   0    0.10    0.11
   0   7   0    0.11    0.10
   0   7   0    0.13    0.14
   0   7   0    0.24    0.14
   0  -7   0    0.11    0.10
   0  -7   0    0.07    0.14
   0  -7   0    0.14    0.10
   0  -7   0    0.29    0.13
   0  -7   0   -0.09    0.15
   0   7   1   78.05    2.27
   0   7  -1   80.44    2.30
   0   7  -1   78.92    2.30
   0   7  -1   77.60    2.32
   0   7   1   81.63    2.46
   0   7  -1   79.33    2.36
   0   7  -1   78.80    2.35
   0   7   1   80.69    2.65
   0  -7  -1   75.56    2.24
   0  -7  -1   78.81    2.40
   0  -7  -1   79.61    2.72
   0  -7  -1   78.82    2.33
   0  -7  -1   76.04    2.38
   0  -7   1   78.35    2.34
   0  -7  -1   78.18    2.34
   0  -7  -1   78.99    2.45
   0  -7   1   79.60    2.36
   0  -7   1   80.76    2.32
   0   7  -2    5.19    0.37
   0   7   2    6.15    0.31
   0   7  -2    5.35    0.24
   0   7   2    6.52    0.30
   0   7  -2    5.17    0.46
   0   7   2    6.02    0.41
   0   7   2    6.39    0.46
   0  -7  -2    6.38    0.43
   0  -7  -2    6.22    0.46
   0  -7   2    5.51    0.38
   0  -7  -2    6.21    0.27
   0  -7  -2    6.36    0.32
   0  -7   2    5.59    0.41
   0   7   3    8.77    0.58
   0   7  -3    8.42    0.51
   0   7   3    8.98    0.55
   0   7   3    8.46    0.45
   0   7   3    8.32    0.43
   0   7  -3    9.07    0.55
   0  -7  -3    8.16    0.41
   0  -7  -3    8.40    0.58
   0  -7   3    8.64    0.56
   0  -7  -3    8.68    0.46
   0  -7   3    7.92    0.50
   0   7  -4    2.65    0.45
   0   7   4    2.90    0.50
   0   7   4    2.81    0.33
   0   7   4    2.54    0.35
   0   7   4    3.28    0.49
   0   7  -4    2.82    0.46
   0  -7   4    2.32    0.38
   0  -7  -4    2.37    0.30
   0  -7   4    2.34    0.39
   0  -7  -4    3.25    0.37
   0  -7  -4    3.13    0.49
   0   7  -5    0.34    0.30
   0   7   5    0.44    0.23
   0   7   5    0.30    0.25
   0   7  -5   -0.07    0.29
   0   7   5    0.90    0.42
   0   7  -5    0.52    0.13
   0  -7  -5    0.23    0.24
   0  -7   5    0.43    0.29
   0  -7  -5    0.95    0.34
   0  -7  -5    0.13    0.20
   0  -7   5    0.26    0.34
   0   7  -6    0.33    0.40
   0   7  -6    0.02    0.31
   0   7   6    1.04    0.52
   0   7   6    0.23    0.30
   0   7  -6    0.13    0.19
   0   7   6   -0.25    0.26
   0  -7  -6    0.13    0.26
   0  -7  -6    0.32    0.42
   0  -7   6    0.16    0.35
   0  -7  -6   -0.08    0.31
   0  -7   6    0.82    0.47
   0   7  -7    3.64    0.69
   0   7   7    2.56    0.60
   0   7   7    3.79    0.65
   0   7   7    2.81    0.55
   0   7  -7    2.51    0.60
   0  -7  -7    2.78    0.65
   0  -7   7    1.87    0.74
   0  -7  -7    3.09    0.56
   0  -7   7    2.93    0.66
   0   7  -8    5.22    0.87
   0   7   8    5.63    0.87
   0   7  -8    4.77    0.83
   0   7   8    4.23    0.73
   0  -7   8    4.58    0.75
   0  -7  -8    4.55    0.77
   0  -7  -8    4.74    0.87
   0  -7   8    4.38    0.99
   0  -7  -8    5.92    0.78
   0   7  -9    5.11    0.95
   0   7   9    5.02    0.90
   0   7   9    5.65    0.92
   0  -7  -9    5.57    0.90
   0  -7  -9    4.62    0.80
   0  -7   9    6.00    0.99
   0  -7  -9    4.80    0.78
   0   7  10    0.29    0.79
   0   7 -10    0.06    0.82
   0   7  10    1.64    0.88
   0  -7 -10   -0.48    0.75
   0  -7  10   -0.29    0.85
   0  -7 -10    1.02    0.75
   0   7  11   -0.08    1.06
   0   7 -11   -0.51    0.96
   0   7  11    1.82    1.04
   0  -7  11   -0.26    1.00
   0  -7 -11    1.33    0.93
   0   8   0  525.52   15.19
   0   8   0  505.64   15.20
   0   8   0  532.10   15.37
   0   8   0  542.90   15.52
   0  -8   0  564.27   15.41
   0  -8   0  527.66   15.23
   0  -8   0  559.25   15.59
   0  -8   0  548.16   15.23
   0  -8   0  554.57   15.28
   0  -8   0  555.20   15.78
   0   8  -1    5.72    0.35
   0   8  -1    5.60    0.34
   0   8   1    6.46    0.33
   0   8   1    6.53    0.45
   0   8   1    7.50    0.59
   0   8  -1    6.12    0.37
   0   8  -1    5.77    0.31
   0   8   1    6.39    0.28
   0   8  -1    5.34    0.32
   0  -8  -1    6.45    0.36
   0  -8   1    6.10    0.38
   0  -8   1    5.82    0.34
   0  -8  -1    6.21    0.25
   0  -8  -1    6.14    0.38
   0  -8  -1    6.07    0.44
   0  -8   1    5.90    0.34
   0  -8  -1    6.36    0.34
   0  -8  -1    6.58    0.43
   0  -8   1    5.37    0.36
   0  -8  -1    6.65    0.26
   0   8   2    8.91    0.56
   0   8   2    8.66    0.37
   0   8   2    8.44    0.47
   0   8  -2    7.58    0.44
   0   8   2    8.48    0.36
   0   8  -2    6.98    0.54
   0   8  -2    7.79    0.33
   0  -8   2    7.95    0.48
   0  -8  -2    8.81    0.49
   0  -8  -2    8.54    0.38
   0  -8  -2    8.13    0.54
   0  -8  -2    8.94    0.34
   0  -8   2    7.70    0.45
   0   8   3    0.55    0.17
   0   8   3    0.47    0.15
   0   8   3    0.45    0.25
   0   8  -3    0.47    0.22
   0   8  -3    0.60    0.23
   0   8   3    0.58    0.24
   0   8   3    1.07    0.61
   0  -8  -3    0.60    0.14
   0  -8  -3    0.59    0.19
   0  -8   3    0.35    0.19
   0  -8   3    0.51    0.24
   0  -8  -3    0.77    0.29
   0   8   4   54.63    1.81
   0   8   4   53.38    1.78
   0   8   4   54.41    1.99
   0   8   4   53.90    1.88
   0   8  -4   51.16    1.89
   0   8  -4   55.31    1.94
   0  -8  -4   53.03    1.74
   0  -8   4   52.57    1.88
   0  -8   4   53.51    1.92
   0  -8  -4   53.51    1.81
   0   8   5    5.53    0.67
   0   8   5    5.61    0.53
   0   8  -5    4.87    0.57
   0   8  -5    6.04    0.65
   0   8   5    6.34    0.50
   0  -8  -5    5.56    0.69
   0  -8  -5    5.35    0.53
   0  -8  -5    5.12    0.45
   0  -8   5    4.89    0.61
   0  -8   5    5.27    0.61
   0   8   6   10.88    0.92
   0   8   6   10.52    0.80
   0   8  -6   10.62    0.81
   0   8   6   11.08    0.74
   0   8  -6   11.01    0.90
   0  -8   6    9.42    0.83
   0  -8   6   10.54    0.89
   0  -8  -6   10.55    0.70
   0  -8  -6   10.57    0.77
   0  -8  -6   10.17    0.92
   0   8   7    1.04    0.38
   0   8  -7    0.68    0.42
   0   8   7    1.14    0.45
   0   8   7    1.00    0.54
   0   8  -7   -0.46    0.46
   0  -8  -7    0.55    0.39
   0  -8  -7    0.14    0.55
   0  -8  -7    0.24    0.32
   0  -8   7    0.64    0.50
   0  -8   7    0.54    0.50
   0   8  -8    2.77    0.67
   0   8  -8    1.99    0.69
   0   8   8    2.53    0.61
   0   8   8    2.47    0.65
   0   8   8    3.05    0.73
   0  -8  -8    2.56    0.59
   0  -8  -8    2.22    0.73
   0  -8  -8    2.73    0.57
   0  -8   8    3.25    0.76
   0  -8   8    2.35    0.67
   0   8  -9    3.33    0.85
   0   8   9    3.30    0.80
   0   8   9    3.33    0.86
   0  -8  -9    3.17    0.86
   0  -8   9    2.86    0.82
   0  -8  -9    2.90    0.71
   0  -8  -9    3.26    0.75
   0   8  10    1.08    0.89
   0   8 -10    0.61    0.80
   0   8  10    0.22    0.76
   0  -8 -10    0.13    0.74
   0  -8  10    1.52    0.93
   0  -8 -10    0.64    0.70
   0   8  11   10.93    1.70
   0  -8  11    7.35    1.24
   0  -8 -11    6.65    1.30
   0   9   0    0.39    0.13
   0   9   0    0.60    0.16
   0   9   0    0.32    0.12
   0  -9   0    0.42    0.20
   0  -9   0    0.27    0.15
   0  -9   0    0.15    0.12
   0  -9   0    0.42    0.12
   0  -9   0    0.30    0.11
   0  -9   0    0.38    0.16
   0   9   1  141.76    4.17
   0   9   1  133.74    3.95
   0   9  -1  136.53    4.02
   0   9  -1  140.19    4.04
   0   9  -1  137.08    3.99
   0   9  -1  141.88    4.07
   0   9  -1  136.84    4.01
   0   9   1  138.28    4.00
   0  -9   1  142.97    4.05
   0  -9   1  141.79    4.03
   0  -9  -1  144.44    4.12
   0  -9  -1  138.54    4.02
   0  -9   1  142.53    3.99
   0  -9  -1  135.84    4.09
   0  -9  -1  138.32    3.93
   0  -9  -1  135.43    3.92
   0  -9   1  135.33    4.08
   0  -9  -1  138.18    4.02
   0  -9   1  135.69    4.02
   0  -9  -1  143.01    4.18
   0   9   2    1.53    0.41
   0   9  -2    1.22    0.24
   0   9   2    1.02    0.22
   0   9   2    1.05    0.16
   0   9   2    1.16    0.16
   0   9  -2    1.24    0.22
   0   9  -2    0.86    0.26
   0   9  -2    1.08    0.15
   0   9   2    0.92    0.27
   0   9  -2    0.76    0.16
   0  -9  -2    1.13    0.34
   0  -9   2    0.90    0.24
   0  -9  -2    1.05    0.22
   0  -9  -2    1.39    0.27
   0  -9  -2    0.99    0.14
   0  -9  -2    0.93    0.15
   0  -9   2    0.83    0.20
   0   9  -3    2.59    0.36
   0   9   3    2.19    0.25
   0   9   3    2.43    0.41
   0   9  -3    2.30    0.38
   0   9   3    2.68    0.40
   0   9   3    1.83    0.26
   0  -9  -3    2.98    0.29
   0  -9  -3    2.44    0.22
   0  -9   3    2.56    0.40
   0  -9  -3    3.13    0.46
   0  -9   3    2.02    0.35
   0   9   4    7.46    0.55
   0   9   4    8.54    0.69
   0   9  -4    8.23    0.66
   0   9  -4    8.89    0.60
   0   9   4    8.05    0.63
   0  -9   4    7.35    0.64
   0  -9  -4    8.05    0.45
   0  -9   4    7.68    0.58
   0  -9  -4    7.92    0.53
   0  -9  -4    7.85    0.68
   0   9  -5    0.94    0.41
   0   9   5    1.45    0.31
   0   9   5    0.95    0.41
   0   9  -5    0.67    0.34
   0   9   5    0.79    0.26
   0  -9  -5    1.01    0.25
   0  -9   5    0.63    0.34
   0  -9   5    0.68    0.34
   0  -9  -5    0.97    0.45
   0  -9  -5    0.86    0.31
   0   9  -6    1.00    0.50
   0   9  -6    1.62    0.44
   0   9   6    1.08    0.64
   0   9   6    0.91    0.32
   0   9   6    1.72    0.40
   0  -9   6    0.70    0.42
   0  -9   6    0.91    0.45
   0  -9  -6    1.76    0.33
   0  -9  -6    1.79    0.42
   0  -9  -6    2.16    0.57
   0   9  -7    0.28    0.46
   0   9   7    0.62    0.52
   0   9   7    0.25    0.41
   0   9   7    0.19    0.37
   0   9  -7    0.59    0.42
   0  -9   7    1.31    0.51
   0  -9   7    0.27    0.51
   0  -9  -7    0.44    0.36
   0  -9  -7    0.70    0.62
   0  -9  -7    0.05    0.38
   0   9   8    6.44    0.95
   0   9  -8    6.83    1.12
   0   9   8    7.23    0.94
   0   9  -8    9.14    1.11
   0   9   8    5.86    0.83
   0  -9   8    7.55    1.00
   0  -9  -8    7.54    0.93
   0  -9  -8    6.07    1.05
   0  -9  -8    6.20    0.77
   0  -9   8    6.64    0.92
   0   9   9    0.54    0.65
   0   9   9   -0.60    0.64
   0   9  -9   -0.11    0.66
   0  -9  -9    0.51    0.57
   0  -9  -9    0.16    0.57
   0  -9  -9    1.41    0.80
   0  -9   9    0.80    0.74
   0   9  10    9.47    1.43
   0   9 -10    9.23    1.51
   0   9  10   11.40    1.57
   0  -9 -10   11.30    1.30
   0   9  11    2.07    1.13
   0   9 -11   -0.34    1.15
   0   9  11    1.50    1.10
   0  -9  11   -2.13    1.00
   0  -9 -11    1.77    0.97
   0  10   0   61.94    1.95
   0  10   0   63.13    1.93
   0  10   0   66.33    2.04
   0  10   0   66.36    2.07
   0 -10   0   62.16    2.03
   0 -10   0   67.00    2.08
   0 -10   0   64.31    1.95
   0 -10   0   64.41    1.92
   0 -10   0   65.54    2.01
   0  10   1   37.20    1.18
   0  10  -1   36.72    1.24
   0  10  -1   36.92    1.25
   0  10  -1   36.79    1.22
   0  10  -1   39.91    1.31
   0  10   1   37.83    1.40
   0  10  -1   38.66    1.27
   0  10  -1   37.33    1.24
   0 -10  -1   39.32    1.34
   0 -10   1   38.49    1.22
   0 -10   1   37.55    1.27
   0 -10  -1   36.91    1.14
   0 -10  -1   39.13    1.25
   0 -10  -1   39.10    1.40
   0 -10  -1   41.02    1.15
   0 -10   1   37.68    1.32
   0 -10  -1   37.70    1.25
   0 -10   1   39.09    1.27
   0 -10  -1   37.15    1.32
   0 -10  -1   37.86    1.70
   0 -10   1   38.26    1.25
   0  10   2    7.30    0.44
   0  10  -2    7.14    0.39
   0  10   2    7.18    0.33
   0  10  -2    6.67    0.35
   0  10   2    7.12    0.55
   0  10  -2    6.90    0.45
   0  10   2    6.14    0.70
   0  10  -2    6.57    0.34
   0  10  -2    7.13    0.46
   0 -10  -2    6.75    0.46
   0 -10   2    6.58    0.45
   0 -10  -2    7.08    0.30
   0 -10   2    6.99    0.48
   0 -10  -2    7.71    0.47
   0 -10  -2    6.83    0.52
   0 -10  -2    7.28    0.35
   0 -10  -2    7.57    0.44
   0 -10  -2    6.12    0.55
   0  10   3   21.89    0.79
   0  10  -3   20.71    0.93
   0  10   3   22.36    1.05
   0  10   3   22.06    0.92
   0  10   3   21.33    0.82
   0  10  -3   20.88    0.95
   0 -10   3   20.07    0.91
   0 -10  -3   22.14    1.05
   0 -10  -3   22.80    0.84
   0 -10  -3   22.49    0.76
   0 -10   3   19.54    0.94
   0  10   4   35.60    1.63
   0  10  -4   44.19    1.65
   0  10  -4   42.40    1.58
   0  10   4   42.75    1.72
   0  10   4   43.28    1.58
   0 -10  -4   42.32    1.40
   0 -10  -4   42.34    1.71
   0 -10   4   42.63    1.62
   0 -10   4   41.12    1.58
   0 -10  -4   42.96    1.49
   0  10   5   14.47    0.75
   0  10  -5   14.46    0.87
   0  10   5   14.47    0.92
   0  10   5   15.42    0.83
   0  10  -5   15.86    0.99
   0 -10  -5   15.10    1.09
   0 -10   5   13.13    0.86
   0 -10  -5   15.01    0.71
   0 -10   5   14.26    0.92
   0 -10  -5   15.78    0.83
   0  10  -6    0.42    0.40
   0  10   6    0.61    0.29
   0  10   6    0.25    0.46
   0  10  -6    0.73    0.45
   0  10   6    0.35    0.33
   0 -10   6    0.88    0.45
   0 -10  -6    0.59    0.24
   0 -10   6    1.23    0.45
   0 -10  -6    0.57    0.50
   0 -10  -6   -0.01    0.30
   0  10   7    1.41    0.47
   0  10   7    1.29    0.37
   0  10   7    0.70    0.54
   0  10  -7    1.56    0.49
   0  10  -7    1.79    0.57
   0 -10   7    1.21    0.53
   0 -10   7    0.57    0.50
   0 -10  -7    0.81    0.60
   0 -10  -7    1.16    0.37
   0 -10  -7    0.88    0.43
   0  10   8    1.77    0.78
   0  10   8    0.26    0.51
   0  10  -8   -0.43    0.84
   0  10  -8   -0.47    0.57
   0  10   8    0.31    0.56
   0 -10  -8    0.47    0.39
   0 -10   8    0.18    0.61
   0 -10   8   -0.32    0.62
   0 -10  -8   -0.34    0.44
   0 -10  -8   -0.10    0.73
   0  10  -9   13.06    1.38
   0  10   9   11.84    1.37
   0  10   9   13.78    1.38
   0 -10  -9   13.30    1.15
   0 -10  -9   11.65    1.23
   0 -10   9   11.36    1.34
   0  10  10    2.00    0.87
   0  10  10    1.90    0.86
   0  10 -10    1.56    1.01
   0 -10 -10    0.69    0.76
   0 -10  10    0.73    0.89
   0 -10 -10    0.34    0.72
   0  10 -11   -0.02    1.19
   0  10  11   -0.74    0.97
   0  10  11    0.79    1.10
   0 -10 -11   -1.60    0.87
   0 -10  11    1.35    1.19
   0  11   0    0.81    0.16
   0  11   0    0.70    0.15
   0 -11   0    0.63    0.15
   0 -11   0    0.78    0.19
   0  11  -1   15.71    0.64
   0  11  -1   15.16    0.63
   0  11  -1   15.70    0.66
   0  11  -1   16.31    0.69
   0  11  -1   15.06    0.65
   0  11   1   16.71    0.60
   0  11   1   16.69    0.81
   0  11  -1   16.77    0.72
   0 -11  -1   17.27    0.56
   0 -11  -1   16.94    0.76
   0 -11  -1   16.40    0.74
   0 -11   1   15.92    0.66
   0 -11  -1   16.70    0.66
   0 -11  -1   16.53    0.80
   0 -11  -1   16.57    0.67
   0 -11  -1   17.36    1.11
   0 -11   1   16.45    0.70
   0 -11   1   15.65    0.73
   0 -11  -1   16.47    0.56
   0 -11   1   16.40    0.64
   0 -11   1   15.82    0.68
   0  11  -2    1.40    0.21
   0  11   2    1.49    0.26
   0  11  -2    1.87    0.28
   0  11   2    1.34    0.19
   0  11  -2    1.59    0.28
   0  11   2    1.80    0.39
   0  11   2    0.81    0.39
   0  11  -2    1.29    0.19
   0  11  -2    1.27    0.24
   0  11  -2    1.30    0.22
   0 -11  -2    1.51    0.16
   0 -11  -2    1.39    0.32
   0 -11   2    1.54    0.29
   0 -11  -2    1.20    0.26
   0 -11  -2    1.15    0.33
   0 -11  -2    1.36    0.19
   0 -11  -2    0.96    0.70
   0 -11  -2    1.85    0.30
   0 -11  -2    1.61    0.28
   0 -11   2    1.52    0.26
   0  11   3    0.24    0.25
   0  11   3    0.18    0.26
   0  11   3    0.69    0.51
   0  11   3    0.43    0.14
   0  11   3    0.54    0.16
   0  11  -3    0.21    0.22
   0  11  -3    0.10    0.24
   0  11  -3    0.28    0.14
   0 -11  -3    0.47    0.13
   0 -11   3    0.29    0.22
   0 -11  -3    0.33    0.32
   0 -11   3   -0.08    0.23
   0 -11  -3    0.39    0.16
   0  11   4   -0.07    0.18
   0  11  -4   -0.08    0.28
   0  11   4    0.67    0.66
   0  11  -4   -0.25    0.23
   0  11   4    0.11    0.35
   0  11   4    0.30    0.29
   0  11   4    0.11    0.15
   0 -11   4   -0.36    0.26
   0 -11  -4    0.05    0.34
   0 -11  -4   -0.03    0.18
   0 -11  -4    0.05    0.14
   0 -11   4   -0.07    0.22
   0  11   5    9.69    0.81
   0  11  -5   11.12    0.79
   0  11   5    9.47    0.63
   0  11  -5   10.68    0.82
   0  11   5    8.66    1.46
   0  11   5   11.01    0.70
   0 -11  -5   10.89    0.69
   0 -11   5   10.31    0.82
   0 -11  -5   10.95    0.92
   0 -11  -5    9.83    0.56
   0 -11   5    9.53    0.77
   0  11  -6    2.78    0.58
   0  11   6    3.24    0.51
   0  11  -6    3.05    0.55
   0  11   6    3.43    0.47
   0  11   6    2.80    0.59
   0 -11  -6    2.87    0.44
   0 -11   6    2.06    0.55
   0 -11   6    2.78    0.63
   0 -11  -6    2.43    0.63
   0 -11  -6    3.47    0.51
   0  11  -7    0.50    0.46
   0  11   7    0.12    0.41
   0  11   7    0.14    0.49
   0  11  -7   -0.32    0.48
   0  11   7    0.78    0.41
   0 -11  -7    0.93    0.61
   0 -11  -7   -0.14    0.37
   0 -11   7    0.15    0.50
   0 -11  -7    0.25    0.33
   0 -11   7    0.12    0.50
   0  11   8    0.48    0.52
   0  11   8   -0.11    0.58
   0  11  -8    0.49    0.57
   0 -11   8    0.13    0.64
   0 -11  -8   -0.13    0.45
   0 -11  -8    0.18    0.41
   0 -11   8   -0.47    0.61
   0 -11  -8   -0.99    0.86
   0  11   9    2.49    0.88
   0  11  -9    2.80    0.88
   0  11   9    2.43    0.78
   0 -11  -9    2.02    0.66
   0 -11  -9    3.02    0.71
   0 -11   9    2.69    0.84
   0  11 -10    3.19    1.08
   0  11  10    2.17    0.91
   0  11  10    3.34    0.92
   0 -11 -10    3.03    0.87
   0 -11  10    2.81    0.96
   0  11  11    4.36    1.17
   0  11  11    3.97    1.36
   0  11 -11    2.16    1.32
   0 -11 -11    1.34    1.07
   0 -11  11    3.91    1.28
   0  12   0  115.23    3.44
   0  12   0  115.12    3.48
   0  12   0  119.72    3.58
   0  12   0  122.92    3.63
   0 -12   0  121.91    3.62
   0 -12   0  115.80    3.58
   0 -12   0  117.35    3.42
   0 -12   0  115.15    3.45
   0 -12   0  119.18    3.47
   0 -12   0  123.48    3.54
   0 -12   0  114.58    3.43
   0  12  -1    0.04    0.18
   0  12  -1    0.07    0.18
   0  12  -1    0.23    0.15
   0  12   1    0.24    0.14
   0  12  -1   -0.12    0.15
   0  12   1    0.20    0.26
   0  12  -1    0.07    0.13
   0  12  -1    0.18    0.17
   0 -12  -1    0.10    0.35
   0 -12  -1   -0.07    0.27
   0 -12   1   -0.02    0.19
   0 -12  -1    0.02    0.08
   0 -12   1    0.12    0.19
   0 -12  -1    0.04    0.11
   0 -12  -1    0.25    0.21
   0 -12   1   -0.01    0.15
   0 -12  -1    0.10    0.18
   0 -12   1   -0.15    0.19
   0 -12   1   -0.04    0.14
   0 -12  -1    0.03    0.19
   0 -12  -1    0.05    0.14
   0  12   2    1.45    0.49
   0  12  -2    1.62    0.26
   0  12  -2    1.70    0.27
   0  12  -2    1.84    0.29
   0  12  -2    1.38    0.26
   0  12  -2    1.50    0.29
   0  12   2    1.95    0.22
   0  12  -2    1.56    0.30
   0  12   2    1.77    0.38
   0  12   2    1.80    0.30
   0 -12   2    1.19    0.29
   0 -12   2    1.60    0.27
   0 -12  -2    1.68    0.25
   0 -12  -2    1.41    0.31
   0 -12  -2    1.59    0.30
   0 -12  -2    1.60    0.32
   0 -12  -2    1.47    0.23
   0 -12  -2    2.04    0.42
   0 -12  -2    1.44    0.17
   0  12   3   14.44    0.60
   0  12  -3   14.98    0.60
   0  12  -3   15.58    0.75
   0  12   3   14.75    0.63
   0  12   3   12.80    1.14
   0  12   3   14.01    0.73
   0  12  -3   16.53    0.83
   0  12   3   15.19    0.90
   0  12  -3   15.01    0.77
   0 -12  -3   14.18    0.76
   0 -12  -3   15.22    0.91
   0 -12   3   14.81    0.75
   0 -12  -3   13.73    0.78
   0 -12  -3   13.45    0.84
   0 -12  -3   14.52    0.56
   0 -12  -3   15.13    0.64
   0  12  -4    2.70    0.41
   0  12  -4    2.59    0.45
   0  12   4    2.77    0.35
   0  12   4    2.39    0.51
   0  12   4    3.33    0.51
   0  12   4    3.91    1.11
   0  12   4    2.19    0.32
   0 -12   4    3.03    0.48
   0 -12  -4    2.54    0.51
   0 -12   4    2.39    0.39
   0 -12  -4    3.08    0.28
   0 -12  -4    2.66    0.37
   0  12   5   15.25    0.82
   0  12   5   15.21    0.95
   0  12  -5   16.42    0.94
   0  12   5   15.55    0.77
   0  12  -5   15.80    1.00
   0 -12   5   14.38    0.95
   0 -12  -5   15.33    0.71
   0 -12   5   14.81    0.96
   0 -12  -5   15.34    1.08
   0 -12  -5   16.32    0.84
   0  12   6   11.66    0.74
   0  12   6   10.11    0.93
   0  12  -6   11.06    0.91
   0  12   6   12.27    0.81
   0  12  -6   12.06    1.01
   0 -12   6    9.65    0.90
   0 -12  -6   10.42    0.66
   0 -12   6    8.99    0.96
   0 -12  -6   11.53    1.05
   0 -12  -6   12.00    0.81
   0  12   7   -0.13    0.47
   0  12  -7    0.30    0.47
   0  12  -7    0.24    0.51
   0  12   7    0.08    0.43
   0  12   7    0.32    0.40
   0 -12   7   -0.25    0.48
   0 -12  -7    0.01    0.32
   0 -12  -7   -0.21    0.35
   0 -12  -7    1.17    0.70
   0  12   8    6.57    1.01
   0  12  -8    9.22    1.20
   0  12   8    8.68    1.00
   0 -12  -8    6.85    1.15
   0 -12   8    7.60    1.03
   0 -12  -8    9.04    1.40
   0 -12   8    9.18    1.19
   0 -12  -8    7.97    0.92
   0  12   9    4.68    0.89
   0  12   9    6.69    1.01
   0  12  -9    5.77    1.06
   0 -12  -9    5.60    0.90
   0 -12   9    6.33    1.06
   0 -12  -9    7.49    1.08
   0  12  10    1.19    0.91
   0  12  10    0.41    0.82
   0  12 -10   -0.56    1.04
   0 -12  10    1.24    0.95
   0 -12 -10    1.95    0.77
   0  13   0    1.08    0.19
   0  13   0    0.64    0.17
   0 -13   0    0.69    0.19
   0 -13   0    0.43    0.20
   0 -13   0    1.30    0.28
   0 -13   0    0.74    0.16
   0  13   1   27.74    1.18
   0  13  -1   26.79    1.02
   0  13   1   27.60    0.93
   0  13  -1   27.93    1.06
   0  13  -1   27.73    0.98
   0  13  -1   26.56    0.97
   0  13   1   26.76    0.89
   0  13  -1   27.24    1.00
   0  13  -1   28.05    1.08
   0 -13   1   28.04    0.99
   0 -13  -1   27.55    0.99
   0 -13  -1   27.84    1.12
   0 -13  -1   26.66    1.09
   0 -13  -1   27.22    0.87
   0 -13   1   26.95    1.09
   0 -13   1   27.76    1.08
   0 -13   1   28.98    1.02
   0 -13  -1   28.73    1.21
   0 -13  -1   27.85    1.01
   0 -13   1   26.71    0.99
   0 -13  -1   27.41    0.89
   0  13  -2    3.23    0.32
   0  13   2    2.94    0.34
   0  13  -2    3.12    0.37
   0  13   2    3.08    0.27
   0  13  -2    2.55    0.32
   0  13  -2    3.02    0.40
   0  13   2    2.91    0.49
   0  13  -2    3.06    0.38
   0  13  -2    3.24    0.33
   0 -13  -2    2.96    0.24
   0 -13  -2    3.33    0.22
   0 -13   2    2.81    0.42
   0 -13  -2    3.15    0.40
   0 -13   2    3.19    0.36
   0 -13  -2    2.73    0.39
   0 -13  -2    4.00    0.53
   0 -13  -2    2.80    0.34
   0  13  -3    4.65    0.46
   0  13  -3    3.87    0.32
   0  13   3    3.71    0.43
   0  13   3    3.74    0.30
   0  13   3    3.74    0.31
   0  13   3    2.56    0.76
   0  13   3    4.05    0.57
   0 -13   3    4.01    0.53
   0 -13  -3    4.40    0.59
   0 -13  -3    3.92    0.53
   0 -13  -3    4.26    0.46
   0 -13  -3    3.25    0.45
   0 -13  -3    3.80    0.53
   0 -13   3    3.46    0.43
   0 -13  -3    3.51    0.25
   0 -13  -3    3.70    0.33
   0  13  -4   15.86    0.95
   0  13  -4   15.76    0.64
   0  13   4   16.95    0.71
   0  13  -4   14.93    0.89
   0  13   4   16.09    1.04
   0  13  -4   16.26    0.86
   0  13   4   16.76    0.88
   0  13   4   15.81    0.75
   0 -13   4   15.32    0.88
   0 -13  -4   16.03    1.03
   0 -13  -4   17.00    0.77
   0 -13   4   15.78    0.94
   0 -13  -4   16.30    0.66
   0  13   5    3.77    0.47
   0  13   5    5.12    1.38
   0  13  -5    3.87    0.62
   0  13   5    3.62    0.57
   0  13  -5    3.92    0.60
   0  13   5    3.83    0.42
   0 -13   5    3.76    0.58
   0 -13  -5    3.43    0.36
   0 -13  -5    3.36    0.50
   0 -13  -5    3.98    0.73
   0 -13   5    2.70    0.52
   0  13  -6   10.46    0.98
   0  13   6   11.39    0.96
   0  13   6    9.26    0.75
   0  13   6    6.82    1.62
   0  13   6    9.84    0.69
   0  13  -6   10.57    0.89
   0 -13  -6    9.63    1.09
   0 -13  -6    9.93    0.74
   0 -13  -6    9.95    0.63
   0 -13   6    8.99    0.91
   0 -13   6   10.21    0.92
   0  13   7   -0.69    1.15
   0  13   7    0.86    0.52
   0  13  -7    0.88    0.57
   0  13   7    1.06    0.42
   0 -13  -7    0.22    0.40
   0 -13   7    0.73    0.54
   0 -13   7    1.02    0.51
   0 -13  -7    1.18    0.74
   0 -13  -7    0.10    0.31
   0  13   8    0.27    0.55
   0  13   8   -0.13    1.89
   0  13  -8    0.90    0.68
   0  13   8    0.43    0.60
   0 -13   8   -0.16    0.60
   0 -13  -8    1.27    0.53
   0 -13   8    0.94    0.73
   0 -13  -8    0.08    0.49
   0  13   9    2.91    0.77
   0  13   9    3.84    0.90
   0  13  -9    1.68    0.92
   0 -13  -9    3.70    0.77
   0 -13  -9    1.20    0.59
   0 -13   9    1.97    0.84
   0  13 -10   -0.63    1.02
   0  13  10    1.80    0.95
   0 -13  10   -1.11    0.95
   0 -13 -10    1.42    0.77
   0  14   0    0.89    0.18
   0  14   0    0.61    0.18
   0  14   0    1.19    0.30
   0 -14   0    0.28    0.16
   0 -14   0    0.20    0.20
   0 -14   0    0.36    0.17
   0 -14   0    0.58    0.18
   0 -14   0    0.53    0.16
   0 -14   0    1.16    0.30
   0  14  -1    1.11    0.28
   0  14   1    1.10    0.15
   0  14   1    1.04    0.19
   0  14  -1    1.53    0.24
   0  14  -1    1.11    0.23
   0  14  -1    1.30    0.30
   0  14  -1    0.99    0.20
   0  14   1    1.10    0.34
   0  14  -1    1.19    0.23
   0 -14  -1    1.13    0.35
   0 -14   1    1.03    0.25
   0 -14  -1    0.65    0.28
   0 -14  -1    0.75    0.45
   0 -14   1    1.24    0.30
   0 -14  -1    0.90    0.27
   0 -14  -1    1.07    0.21
   0 -14   1    1.06    0.22
   0 -14   1    1.23    0.23
   0 -14  -1    1.33    0.16
   0 -14  -1    0.98    0.25
   0 -14  -1    1.04    0.16
   0 -14   1    0.83    0.26
   0  14   2    2.72    0.34
   0  14  -2    2.22    0.36
   0  14  -2    2.26    0.31
   0  14  -2    1.99    0.31
   0  14  -2    2.78    0.32
   0  14   2    2.86    0.27
   0  14   2    2.82    0.50
   0 -14  -2    2.69    0.23
   0 -14  -2    4.42    1.11
   0 -14  -2    2.66    0.24
   0 -14  -2    1.97    0.32
   0 -14   2    2.25    0.33
   0 -14   2    2.10    0.35
   0 -14  -2    2.42    0.45
   0 -14  -2    2.55    0.38
   0 -14  -2    2.07    0.37
   0  14  -3    5.45    0.53
   0  14   3    4.83    0.35
   0  14   3    5.64    0.36
   0  14  -3    5.74    0.56
   0  14   3    4.93    0.49
   0  14  -3    5.91    0.53
   0  14  -3    5.77    0.45
   0  14  -3    5.42    0.39
   0  14   3    5.14    0.64
   0 -14  -3    5.46    0.39
   0 -14   3    5.42    0.51
   0 -14  -3    5.16    0.30
   0 -14   3    5.57    0.58
   0 -14  -3    5.70    0.54
   0 -14  -3    5.79    0.52
   0 -14  -3    5.37    0.68
   0 -14  -3    6.41    0.67
   0 -14  -3    5.20    0.58
   0  14   4   21.60    0.87
   0  14  -4   20.49    1.06
   0  14   4   22.40    1.06
   0  14   4   21.44    1.23
   0  14   4   22.03    0.92
   0  14   4   22.33    1.68
   0  14  -4   21.27    0.83
   0  14  -4   21.82    1.05
   0  14  -4   23.80    1.15
   0 -14   4   22.98    1.07
   0 -14  -4   22.54    1.07
   0 -14   4   22.13    1.16
   0 -14  -4   22.56    0.82
   0 -14  -4   23.20    1.27
   0 -14  -4   20.97    1.16
   0 -14  -4   23.40    0.94
   0  14   5   -0.36    0.20
   0  14   5   -0.25    0.75
   0  14  -5    0.05    0.38
   0  14  -5   -0.31    0.41
   0  14   5   -0.31    0.38
   0 -14  -5    0.45    0.55
   0 -14  -5   -0.14    0.27
   0 -14  -5   -0.08    0.18
   0 -14   5    0.24    0.41
   0 -14   5    0.10    0.39
   0  14   6    0.08    0.30
   0  14  -6    1.19    0.49
   0  14   6    0.16    0.35
   0  14  -6   -0.49    0.46
   0  14   6    1.39    1.07
   0  14   6   -0.29    0.45
   0 -14  -6   -0.28    0.50
   0 -14  -6   -0.12    0.27
   0 -14   6    0.18    0.42
   0 -14  -6   -0.34    0.31
   0 -14   6   -0.53    0.44
   0  14   7    0.58    1.00
   0  14   7    1.93    0.63
   0  14  -7    1.97    0.68
   0  14   7    1.21    0.50
   0  14   7    1.50    0.44
   0 -14  -7    1.81    0.49
   0 -14   7    2.40    0.65
   0 -14  -7    1.48    1.43
   0 -14  -7    2.20    0.40
   0 -14   7    2.01    0.64
   0  14   8    0.61    0.55
   0  14   8    0.26    0.58
   0  14  -8   -0.25    0.70
   0  14   8    1.44    2.09
   0 -14   8   -0.31    0.71
   0 -14  -8    0.20    0.48
   0 -14   8   -0.39    0.62
   0 -14  -8    0.15    0.40
   0  14   9    0.47    0.75
   0  14   9    0.47    0.66
   0 -14  -9   -0.13    0.52
   0 -14   9    0.12    0.81
   0 -14  -9    0.95    0.63
   0  14  10    3.71    1.00
   0  14 -10    1.78    1.12
   0  14  10    2.96    1.03
   0 -14  10    2.59    1.13
   0  15   0    0.22    0.17
   0  15   0    0.34    0.18
   0  15   0    0.67    0.25
   0  15   0    0.79    0.32
   0 -15   0    0.10    0.41
   0 -15   0    0.07    0.21
   0 -15   0    0.17    0.17
   0 -15   0    0.15    0.15
   0 -15   0    0.39    0.24
   0 -15   0    0.13    0.15
   0 -15   0   -0.07    0.16
   0  15  -1   13.34    0.60
   0  15   1   12.05    0.55
   0  15  -1   13.81    0.64
   0  15   1   13.30    0.81
   0  15  -1   12.72    0.61
   0  15  -1   13.30    0.71
   0  15  -1   13.01    0.70
   0  15   1   13.03    0.48
   0 -15  -1   11.28    1.14
   0 -15  -1   12.68    0.51
   0 -15   1   12.50    0.64
   0 -15   1   13.39    0.72
   0 -15   1   12.73    0.75
   0 -15  -1   13.56    0.63
   0 -15  -1   13.30    0.75
   0 -15   1   13.54    0.64
   0 -15   1   13.26    0.61
   0 -15  -1   12.95    0.48
   0 -15  -1   12.36    0.72
   0 -15  -1   12.76    0.64
   0  15  -2    0.34    0.26
   0  15   2    0.26    0.33
   0  15   2    0.20    0.16
   0  15  -2    0.00    0.20
   0  15  -2    0.63    0.32
   0  15  -2    0.10    0.20
   0  15  -2    0.05    0.19
   0  15  -2    0.38    0.23
   0  15   2    0.07    0.11
   0 -15  -2    0.14    0.27
   0 -15  -2    0.03    0.19
   0 -15  -2    0.14    0.13
   0 -15  -2   -0.04    0.13
   0 -15   2    0.44    0.22
   0 -15  -2    0.20    0.31
   0 -15   2    0.40    0.27
   0 -15  -2    0.21    0.33
   0 -15  -2    0.02    0.18
   0  15  -3    8.76    0.51
   0  15  -3    8.83    0.65
   0  15  -3    8.89    0.66
   0  15   3    9.88    0.62
   0  15  -3    9.46    0.56
   0  15  -3    9.15    0.64
   0  15   3    9.43    0.83
   0  15   3    9.22    0.49
   0  15   3    9.37    1.06
   0 -15   3    9.55    0.74
   0 -15  -3    9.20    0.67
   0 -15  -3   10.00    0.81
   0 -15   3    9.36    0.63
   0 -15  -3    8.90    0.63
   0 -15  -3   10.19    0.50
   0 -15  -3    9.35    0.85
   0 -15  -3    8.67    0.42
   0  15   4   41.81    2.39
   0  15   4   45.98    1.60
   0  15   4   47.94    1.74
   0  15  -4   47.67    1.79
   0  15  -4   46.72    1.52
   0  15   4   47.02    1.56
   0  15  -4   48.15    1.75
   0  15   4   43.37    1.95
   0 -15  -4   48.08    2.01
   0 -15   4   48.86    1.87
   0 -15  -4   47.99    1.61
   0 -15  -4   43.76    1.89
   0 -15   4   44.70    1.77
   0 -15  -4   46.32    1.79
   0 -15  -4   47.13    1.49
   0 -15  -4   46.93    1.75
   0  15  -5   11.07    0.93
   0  15  -5   10.14    0.54
   0  15  -5    9.14    0.85
   0  15   5   10.23    0.61
   0  15   5    9.57    0.83
   0  15  -5   10.29    0.80
   0  15   5    8.40    0.76
   0  15   5    8.04    1.48
   0 -15  -5    9.54    1.04
   0 -15   5    9.55    0.96
   0 -15  -5   10.76    0.97
   0 -15  -5   10.21    0.82
   0 -15  -5   10.59    0.70
   0 -15  -5   10.90    0.55
   0 -15   5   10.32    0.85
   0  15   6   13.26    0.99
   0  15   6   12.04    0.76
   0  15  -6   15.67    1.13
   0  15  -6   13.30    1.02
   0  15   6    9.38    1.77
   0  15   6   14.04    0.87
   0 -15   6   13.08    1.06
   0 -15  -6   13.52    1.15
   0 -15  -6   11.14    0.84
   0 -15  -6   12.16    0.70
   0 -15   6   13.86    1.11
   0 -15  -6   12.35    1.22
   0  15   7    1.99    1.28
   0  15   7    2.79    0.51
   0  15   7    3.14    0.60
   0  15  -7    2.39    0.72
   0 -15  -7    3.66    0.58
   0 -15   7    3.23    0.72
   0 -15  -7    3.33    0.54
   0 -15  -7    1.83    1.02
   0 -15   7    2.85    0.70
   0  15   8    9.32    1.08
   0  15   8    8.47    1.13
   0  15  -8    7.88    1.12
   0 -15  -8    8.91    0.98
   0 -15   8    8.85    1.16
   0 -15   8    8.27    1.23
   0 -15  -8   10.35    0.85
   0  15  -9    0.55    0.88
   0  15   9    0.48    0.76
   0  15   9    1.66    0.79
   0 -15  -9    1.56    0.69
   0 -15   9    1.62    0.88
   0  15  10    4.98    1.15
   0 -15 -10    3.88    0.91
   0  16   0    3.06    0.48
   0  16   0    2.76    0.34
   0  16   0    3.07    0.44
   0  16   0    2.41    0.35
   0 -16   0    2.47    0.40
   0 -16   0    2.49    0.35
   0 -16   0    2.03    0.32
   0 -16   0    2.45    0.29
   0 -16   0    2.98    0.52
   0 -16   0    2.56    0.43
   0 -16   0    2.47    0.63
   0 -16   0    2.87    0.28
   0  16  -1   16.44    0.81
   0  16  -1   15.80    0.67
   0  16   1   15.69    0.92
   0  16  -1   16.06    0.72
   0  16   1   14.91    0.64
   0  16  -1   15.60    0.71
   0  16   1   15.67    0.56
   0  16  -1   16.33    0.83
   0 -16   1   16.90    0.75
   0 -16  -1   16.20    0.57
   0 -16  -1   15.13    0.74
   0 -16   1   17.20    0.90
   0 -16  -1   15.88    0.95
   0 -16   1   15.84    0.87
   0 -16   1   15.33    0.70
   0 -16  -1   15.26    0.60
   0 -16  -1   16.20    0.74
   0 -16   1   17.04    0.84
   0 -16  -1   15.52    0.85
   0  16  -2    3.84    0.44
   0  16   2    3.80    0.63
   0  16  -2    4.22    0.50
   0  16  -2    4.02    0.42
   0  16  -2    2.75    0.43
   0  16   2    4.43    0.37
   0  16   2    3.81    0.27
   0  16  -2    4.10    0.46
   0  16  -2    3.14    0.39
   0 -16  -2    3.58    0.50
   0 -16  -2    3.72    0.29
   0 -16   2    3.91    0.51
   0 -16   2    3.40    0.42
   0 -16  -2    4.19    0.65
   0 -16  -2    4.12    0.28
   0 -16  -2    3.67    0.58
   0 -16  -2    3.62    0.42
   0 -16  -2    3.65    0.50
   0  16  -3    5.64    0.49
   0  16   3    6.57    0.98
   0  16  -3    6.09    0.60
   0  16   3    5.94    0.75
   0  16   3    6.73    0.56
   0  16  -3    6.23    0.61
   0  16  -3    6.05    0.46
   0  16  -3    6.95    0.61
   0 -16  -3    6.92    0.68
   0 -16  -3    6.87    0.43
   0 -16   3    6.77    0.66
   0 -16  -3    6.55    0.78
   0 -16   3    6.20    0.56
   0 -16  -3    6.58    0.62
   0 -16  -3    6.68    0.55
   0 -16  -3    6.94    0.37
   0 -16  -3    6.36    0.75
   0  16  -4   -0.26    0.34
   0  16   4    0.63    0.22
   0  16  -4    0.15    0.36
   0  16  -4    0.62    0.37
   0  16   4    0.66    0.35
   0  16   4    1.02    0.24
   0  16   4    1.34    0.70
   0  16   4    0.78    0.45
   0  16  -4    0.13    0.25
   0  16  -4    0.26    0.21
   0 -16  -4    0.90    0.37
   0 -16  -4    1.07    0.59
   0 -16  -4    0.79    0.42
   0 -16  -4    0.25    0.31
   0 -16   4    0.48    0.32
   0 -16  -4    0.92    0.18
   0 -16  -4    0.44    0.26
   0 -16   4    0.74    0.40
   0  16  -5    5.85    0.74
   0  16   5    3.96    0.45
   0  16   5    4.11    0.66
   0  16  -5    3.79    0.40
   0  16   5    4.71    1.33
   0  16  -5    4.75    0.66
   0  16   5    4.63    0.54
   0 -16  -5    3.93    0.64
   0 -16  -5    4.89    0.69
   0 -16  -5    4.64    0.55
   0 -16   5    4.20    0.72
   0 -16  -5    4.05    0.65
   0 -16  -5    4.09    0.39
   0 -16  -5    5.05    0.85
   0 -16   5    5.63    0.81
   0  16   6    1.69    0.54
   0  16   6    0.69    1.01
   0  16   6    2.06    0.45
   0  16   6    3.11    0.49
   0  16  -6    1.43    0.52
   0  16  -6    2.23    0.37
   0  16  -6    2.93    0.60
   0 -16  -6    1.28    0.64
   0 -16   6    2.06    0.61
   0 -16  -6    1.92    0.51
   0 -16  -6    1.99    0.81
   0 -16  -6    2.05    0.33
   0  16   7    4.65    0.78
   0  16   7    3.97    0.71
   0  16  -7    3.60    0.78
   0  16   7    3.22    0.55
   0 -16   7    3.60    0.77
   0 -16  -7    4.65    1.03
   0 -16   7    4.28    0.80
   0 -16  -7    3.81    0.57
   0  16   8   -0.18    0.52
   0  16  -8    1.68    0.82
   0  16   8    1.13    0.64
   0 -16   8    0.54    0.78
   0 -16  -8    0.81    0.43
   0 -16   8    0.43    0.72
   0 -16  -8    0.71    0.54
   0  16   9    0.37    0.74
   0  16   9    1.63    0.79
   0 -16  -9    1.72    0.70
   0 -16   9    0.30    0.88
   0  16  10    0.37    0.85
   0 -16 -10    1.46    0.85
   0 -16  10   -0.45    1.02
   0  17   0    0.45    0.20
   0  17   0    0.64    0.35
   0  17   0    0.15    0.21
   0  17   0    0.24    0.27
   0 -17   0    0.20    0.15
   0 -17   0   -0.04    0.20
   0 -17   0    0.06    0.19
   0 -17   0    0.36    0.27
   0 -17   0    0.75    0.41
   0 -17   0    0.03    0.42
   0 -17   0    0.22    0.30
   0 -17   0    0.30    0.22
   0  17  -1   20.02    1.02
   0  17  -1   23.59    1.04
   0  17  -1   23.33    0.89
   0  17  -1   22.84    0.94
   0  17   1   24.02    0.77
   0  17   1   22.10    0.85
   0  17   1   23.75    1.17
   0  17  -1   22.43    1.05
   0 -17   1   23.58    1.06
   0 -17   1   23.31    0.95
   0 -17  -1   22.81    1.09
   0 -17   1   21.42    1.09
   0 -17  -1   24.41    0.98
   0 -17  -1   25.50    1.20
   0 -17  -1   24.14    0.95
   0 -17   1   22.94    0.95
   0 -17  -1   24.04    0.78
   0 -17   1   21.33    0.91
   0 -17  -1   24.15    1.09
   0  17   2    4.84    0.40
   0  17  -2    5.05    0.51
   0  17   2    4.24    0.66
   0  17  -2    5.76    0.51
   0  17  -2    6.10    0.51
   0  17   2    5.41    0.32
   0  17  -2    5.71    0.48
   0  17  -2    5.05    0.50
   0  17  -2    5.25    0.57
   0 -17   2    4.35    0.49
   0 -17  -2    5.47    0.72
   0 -17  -2    5.20    0.56
   0 -17  -2    4.75    1.32
   0 -17  -2    4.43    0.60
   0 -17  -2    5.42    0.34
   0 -17  -2    5.52    0.49
   0 -17  -2    5.48    0.33
   0 -17  -2    6.19    0.98
   0 -17   2    5.30    0.57
   0  17  -3   36.72    1.40
   0  17   3   35.91    1.35
   0  17  -3   35.09    1.41
   0  17   3   34.11    1.21
   0  17   3   33.61    1.65
   0  17  -3   33.84    1.26
   0  17  -3   35.29    1.29
   0  17  -3   36.66    1.44
   0 -17  -3   34.77    1.65
   0 -17  -3   33.98    1.36
   0 -17  -3   35.87    1.56
   0 -17  -3   36.06    1.20
   0 -17  -3   34.68    1.45
   0 -17  -3   33.46    1.47
   0 -17   3   33.68    1.38
   0 -17   3   36.44    1.48
   0 -17  -3   33.89    1.14
   0  17  -4   14.17    0.77
   0  17   4   13.07    1.43
   0  17  -4   13.39    0.89
   0  17  -4   14.28    0.90
   0  17   4   14.85    0.87
   0  17   4   13.89    0.68
   0  17   4   13.35    1.07
   0  17  -4   13.91    0.68
   0  17   4   13.43    0.69
   0  17  -4   13.40    0.90
   0 -17   4   14.28    0.89
   0 -17  -4   14.29    0.60
   0 -17  -4   13.63    0.90
   0 -17  -4   15.48    0.87
   0 -17   4   14.62    1.00
   0 -17  -4   14.78    1.16
   0 -17  -4   14.06    1.09
   0 -17  -4   14.25    0.77
   0  17  -5    0.15    0.21
   0  17   5    0.32    0.41
   0  17   5    0.06    0.76
   0  17  -5   -0.06    0.43
   0  17  -5   -0.02    0.39
   0  17  -5    0.04    0.41
   0  17   5   -0.08    0.22
   0  17   5    0.53    0.29
   0 -17  -5   -0.42    0.65
   0 -17  -5    0.24    0.19
   0 -17  -5   -0.14    0.45
   0 -17  -5   -0.17    0.34
   0 -17   5   -0.33    0.42
   0 -17  -5    0.33    0.30
   0 -17  -5    0.92    0.41
   0 -17   5   -0.01    0.45
   0  17  -6    0.03    0.44
   0  17  -6    0.35    0.24
   0  17   6   -0.44    0.30
   0  17   6    0.10    0.44
   0  17   6    1.16    0.94
   0  17   6    0.04    0.33
   0  17  -6    0.63    0.83
   0 -17  -6    0.81    1.15
   0 -17  -6    0.25    0.41
   0 -17  -6    0.25    0.25
   0 -17  -6    0.01    0.54
   0 -17  -6    0.35    0.35
   0 -17   6    1.81    0.58
   0 -17   6    0.01    0.51
   0  17  -7    2.91    0.46
   0  17   7    2.69    0.69
   0  17   7    3.48    0.62
   0  17  -7    1.82    0.64
   0 -17  -7    3.61    0.93
   0 -17   7    3.59    0.73
   0 -17  -7    3.55    0.72
   0 -17   7    3.36    0.76
   0 -17  -7    2.46    0.43
   0  17   8    4.78    0.82
   0  17   8    7.56    1.07
   0 -17   8    4.93    1.04
   0 -17  -8    4.37    0.73
   0 -17  -8    5.41    0.94
   0 -17   8    4.54    0.91
   0  17   9    2.18    0.77
   0  17   9    1.10    1.14
   0 -17  -9    1.54    0.71
   0 -17   9    1.14    0.96
   0  17  10    1.38    0.93
   0  17 -10    1.67    1.22
   0 -17  10    1.02    1.21
   0 -17 -10    0.58    0.85
   0  18   0   54.48    1.85
   0  18   0   54.38    2.26
   0  18   0   53.94    1.75
   0  18   0   55.42    1.97
   0 -18   0   52.48    1.72
   0 -18   0   55.75    1.84
   0 -18   0   52.60    1.98
   0 -18   0   54.51    2.59
   0 -18   0   55.83    2.04
   0 -18   0   53.41    1.80
   0 -18   0   55.24    1.69
   0  18  -1    6.14    0.43
   0  18  -1    6.65    0.51
   0  18  -1    6.35    0.59
   0  18  -1    7.00    0.64
   0  18  -1    6.54    0.51
   0  18   1    5.77    0.41
   0  18   1    6.20    0.32
   0  18   1    6.46    0.69
   0 -18  -1    6.34    0.32
   0 -18   1    7.31    0.54
   0 -18   1    6.40    0.68
   0 -18   1    6.97    0.51
   0 -18  -1    4.90    0.73
   0 -18  -1    6.02    0.51
   0 -18  -1    5.71    0.40
   0 -18  -1    6.42    0.55
   0 -18  -1    6.00    0.64
   0 -18   1    6.37    0.47
   0 -18  -1    6.86    0.76
   0 -18  -1    7.31    1.20
   0  18  -2   59.09    1.94
   0  18   2   55.91    2.23
   0  18   2   56.68    1.81
   0  18   2   56.48    1.75
   0  18  -2   58.82    1.97
   0  18  -2   59.11    2.07
   0  18  -2   57.93    1.91
   0 -18  -2   55.41    2.09
   0 -18  -2   58.36    2.13
   0 -18  -2   52.66    2.12
   0 -18  -2   56.21    1.74
   0 -18  -2   58.00    1.94
   0 -18  -2   59.67    1.81
   0 -18  -2   57.59    2.25
   0 -18   2   58.27    2.00
   0 -18   2   56.38    2.02
   0  18  -3    3.01    0.47
   0  18   3    2.37    0.59
   0  18  -3    3.56    0.56
   0  18   3    3.48    0.33
   0  18  -3    3.59    0.47
   0  18  -3    3.35    0.60
   0  18  -3    2.58    0.44
   0 -18  -3    3.18    0.36
   0 -18  -3    2.41    0.66
   0 -18  -3    2.23    0.50
   0 -18   3    3.54    0.53
   0 -18   3    3.84    0.62
   0 -18  -3    2.59    0.41
   0 -18  -3    2.94    0.51
   0  18   4    3.65    0.43
   0  18   4    4.16    1.09
   0  18  -4    2.80    0.36
   0  18   4    4.14    0.74
   0  18  -4    3.34    0.54
   0  18  -4    3.28    0.52
   0  18  -4    3.16    0.49
   0  18  -4    3.45    0.62
   0 -18  -4    2.86    0.77
   0 -18  -4    3.48    0.61
   0 -18  -4    2.59    0.63
   0 -18  -4    3.70    0.59
   0 -18   4    3.11    0.60
   0 -18   4    2.68    0.47
   0 -18  -4    2.86    0.32
   0 -18  -4    3.06    0.43
   0  18  -5    8.97    0.68
   0  18  -5    8.06    0.84
   0  18   5    8.40    0.79
   0  18  -5    8.79    0.54
   0  18   5    9.37    0.64
   0  18   5    8.24    0.66
   0  18  -5    7.55    0.88
   0  18   5    6.63    1.37
   0  18  -5    9.43    0.84
   0 -18  -5    8.46    1.09
   0 -18   5    9.56    0.91
   0 -18  -5    8.24    0.50
   0 -18   5    8.42    0.93
   0 -18  -5    9.14    0.66
   0 -18  -5    8.49    0.86
   0 -18  -5    8.04    0.79
   0 -18  -5    8.42    1.15
   0  18  -6    2.58    0.59
   0  18   6    2.66    0.59
   0  18   6    2.19    0.42
   0  18   6    1.81    0.96
   0  18  -6    1.83    0.28
   0  18  -6    2.04    0.61
   0 -18  -6    1.80    0.47
   0 -18  -6    1.63    0.31
   0 -18   6    0.84    0.62
   0 -18  -6    0.37    0.51
   0 -18   6    2.42    0.63
   0 -18  -6    2.13    0.53
   0  18   7   -0.22    0.45
   0  18   7    0.22    0.57
   0  18  -7    0.03    0.26
   0  18  -7    0.95    0.63
   0  18   7   -1.24    1.17
   0  18   7    0.47    0.45
   0  18  -7    0.01    0.53
   0 -18   7   -0.10    0.62
   0 -18  -7   -0.49    0.32
   0 -18  -7    0.71    0.47
   0 -18  -7    0.34    0.51
   0 -18   7    0.34    0.70
   0  18   8   -0.51    0.62
   0  18  -8    0.20    0.78
   0  18   8    0.20    0.61
   0  18  -8    0.28    0.45
   0 -18  -8   -0.02    0.58
   0 -18   8   -0.76    0.72
   0 -18  -8    0.02    0.49
   0 -18  -8    0.42    0.58
   0  18   9   -0.69    0.78
   0  18  -9    1.75    1.01
   0 -18   9    1.31    0.89
   0 -18  -9    1.93    0.71
   0 -18  -9    1.22    0.74
   0  19   0    0.02    0.24
   0  19   0    0.55    0.39
   0  19   0    0.67    0.32
   0  19   0    0.29    0.25
   0  19   0    0.35    0.24
   0 -19   0    0.78    0.32
   0 -19   0    0.08    0.16
   0 -19   0    0.45    0.20
   0 -19   0    0.85    0.42
   0 -19   0    0.30    0.63
   0 -19   0    0.40    0.31
   0 -19   0    0.38    0.25
   0 -19   0   -0.14    0.23
   0  19   1    1.96    0.22
   0  19  -1    1.56    0.45
   0  19  -1    1.85    0.29
   0  19   1    1.86    0.33
   0  19  -1    2.08    0.34
   0  19   1    2.26    0.56
   0  19  -1    1.64    0.29
   0  19  -1    1.58    0.38
   0 -19   1    1.46    0.30
   0 -19   1    1.88    0.35
   0 -19  -1    1.81    0.25
   0 -19   1    1.84    0.32
   0 -19  -1    1.19    0.76
   0 -19  -1    2.17    0.37
   0 -19  -1    2.29    0.46
   0 -19   1    2.19    0.50
   0 -19  -1    1.98    0.35
   0 -19  -1    1.98    0.44
   0 -19  -1    1.74    0.30
   0  19  -2   10.72    0.66
   0  19  -2   11.05    0.72
   0  19  -2   11.86    0.66
   0  19   2   11.13    0.96
   0  19  -2   11.46    0.81
   0  19   2   11.29    0.48
   0  19   2    9.03    0.74
   0 -19  -2   10.42    0.82
   0 -19  -2   10.67    0.49
   0 -19  -2   10.64    0.68
   0 -19   2   11.74    0.78
   0 -19  -2   11.08    0.97
   0 -19  -2   11.69    0.48
   0 -19   2   11.62    0.69
   0 -19  -2   11.37    0.77
   0 -19  -2   11.76    0.92
   0  19  -3    7.21    0.59
   0  19  -3    6.71    0.74
   0  19   3    7.39    0.44
   0  19  -3    7.43    0.71
   0  19  -3    6.61    0.58
   0  19   3    6.08    0.84
   0  19   3    6.74    0.53
   0  19  -3    8.34    0.68
   0 -19  -3    7.46    0.72
   0 -19  -3    7.92    0.78
   0 -19  -3    6.78    0.46
   0 -19  -3    6.36    0.40
   0 -19  -3    7.44    0.73
   0 -19   3    6.00    0.75
   0 -19  -3    7.22    0.96
   0 -19   3    5.78    0.65
   0 -19  -3    5.53    0.81
   0  19   4   13.21    0.83
   0  19   4   13.06    1.43
   0  19  -4   13.09    0.94
   0  19  -4   12.29    0.73
   0  19   4   13.06    0.72
   0  19  -4   12.40    0.75
   0  19  -4   13.06    0.90
   0  19  -4   14.80    0.93
   0 -19  -4   13.31    0.84
   0 -19  -4   13.84    1.12
   0 -19  -4   11.73    0.91
   0 -19  -4   13.39    0.70
   0 -19  -4   13.33    1.18
   0 -19   4   12.54    0.98
   0 -19  -4   12.52    0.59
   0 -19   4   10.88    0.90
   0  19  -5   14.98    1.07
   0  19   5   15.48    0.96
   0  19  -5   14.01    0.82
   0  19  -5   15.54    1.02
   0  19   5   15.04    0.82
   0  19  -5   12.96    0.69
   0  19  -5   12.27    1.02
   0  19   5   14.00    0.81
   0  19   5   17.78    1.75
   0 -19  -5   14.85    1.05
   0 -19  -5   13.08    1.25
   0 -19  -5   13.91    0.96
   0 -19  -5   17.70    2.13
   0 -19   5   14.53    1.11
   0 -19  -5   14.28    0.81
   0 -19  -5   13.81    0.65
   0 -19   5   14.59    1.08
   0  19   6    5.53    0.66
   0  19  -6    7.31    0.89
   0  19  -6    6.59    0.99
   0  19   6    7.01    0.76
   0  19   6    5.40    0.82
   0  19  -6    6.89    0.52
   0  19   6    5.46    1.40
   0 -19  -6    6.92    0.55
   0 -19   6    7.62    1.02
   0 -19   6    6.29    0.84
   0 -19  -6    7.40    0.90
   0 -19  -6    7.12    0.74
   0  19  -7    0.36    0.26
   0  19   7    0.82    0.49
   0  19  -7   -0.33    0.66
   0  19   7    0.33    0.59
   0 -19   7    0.70    0.69
   0 -19   7    1.43    0.78
   0 -19  -7    0.02    0.32
   0 -19  -7    1.52    0.50
   0 -19  -7    0.51    0.55
   0  19   8    8.28    1.12
   0  19   8    6.74    0.92
   0  19  -8    8.68    1.38
   0 -19   8    5.55    1.09
   0 -19  -8    6.67    0.97
   0 -19  -8    9.19    1.04
   0  19   9    3.21    0.91
   0  19  -9    4.86    1.17
   0 -19   9    1.90    1.02
   0 -19  -9    3.65    0.90
   0 -19  -9    3.92    0.79
   0  20   0    0.78    0.41
   0  20   0    0.60    0.27
   0  20   0    0.27    0.23
   0  20   0    0.74    0.38
   0  20   0    0.22    0.14
   0 -20   0    0.15    0.25
   0 -20   0    0.36    0.17
   0 -20   0    0.50    0.42
   0 -20   0    0.29    0.21
   0 -20   0    0.99    0.71
   0 -20   0    0.86    0.40
   0 -20   0    0.53    0.28
   0 -20   0    0.17    0.32
   0  20  -1    0.44    0.37
   0  20  -1   -0.01    0.24
   0  20   1   -0.04    0.12
   0  20   1   -0.10    0.43
   0  20  -1    0.24    0.26
   0  20  -1   -0.16    0.19
   0 -20  -1    0.13    0.34
   0 -20  -1    0.08    0.13
   0 -20  -1   -0.41    0.24
   0 -20  -1   -0.38    0.63
   0 -20  -1   -0.01    0.36
   0 -20  -1   -0.13    0.31
   0 -20   1   -0.37    0.22
   0 -20  -1    0.35    0.45
   0 -20  -1    0.02    0.18
   0 -20   1    0.23    0.28
   0 -20   1    0.24    0.38
   0  20  -2    0.94    0.35
   0  20  -2    0.84    0.29
   0  20   2    1.41    0.19
   0  20  -2    1.68    0.33
   0  20   2    2.51    0.60
   0  20   2    1.39    0.31
   0  20  -2    1.64    0.46
   0 -20   2    1.00    0.34
   0 -20  -2    2.05    0.61
   0 -20  -2    1.12    0.41
   0 -20  -2    1.94    0.47
   0 -20  -2    1.81    0.25
   0 -20  -2    1.64    0.45
   0 -20   2    1.17    0.46
   0 -20  -2    1.32    0.34
   0  20   3   36.89    1.33
   0  20  -3   37.16    1.52
   0  20   3   34.91    1.25
   0  20  -3   38.36    1.49
   0  20  -3   37.25    1.40
   0  20  -3   36.79    1.56
   0 -20   3   35.29    1.49
   0 -20  -3   38.70    1.59
   0 -20  -3   36.74    1.46
   0 -20  -3   36.01    1.20
   0 -20  -3   36.46    1.81
   0 -20  -3   37.31    1.62
   0 -20  -3   38.95    1.24
   0 -20   3   37.92    1.58
   0 -20  -3   35.14    1.69
   0  20  -4   12.50    0.91
   0  20   4    8.33    0.63
   0  20  -4    9.52    0.68
   0  20  -4   10.58    0.87
   0  20  -4    9.58    0.85
   0  20   4   10.97    0.79
   0  20  -4   10.79    0.64
   0 -20  -4    9.62    0.98
   0 -20  -4   10.20    0.61
   0 -20  -4    9.29    0.99
   0 -20   4   12.37    0.97
   0 -20  -4    9.76    0.51
   0 -20   4    9.30    0.89
   0 -20  -4   10.53    0.79
   0 -20  -4    8.64    1.12
   0  20  -5    6.09    0.84
   0  20  -5    5.56    0.51
   0  20  -5    5.98    0.82
   0  20  -5    4.90    0.56
   0  20   5    5.32    1.28
   0  20   5    5.37    0.58
   0  20   5    5.12    0.59
   0  20   5    5.59    0.71
   0 -20   5    5.72    0.78
   0 -20  -5    4.33    0.60
   0 -20  -5    3.76    0.77
   0 -20  -5    6.53    1.19
   0 -20   5    5.21    1.00
   0 -20  -5    3.74    0.42
   0 -20  -5    3.86    0.58
   0 -20  -5    4.34    0.76
   0  20  -6    2.60    0.45
   0  20  -6    1.90    0.33
   0  20   6    1.32    0.45
   0  20   6    0.91    0.53
   0  20  -6    1.75    0.65
   0  20   6    1.37    0.39
   0  20  -6    2.86    0.64
   0 -20  -6    1.59    0.61
   0 -20   6    1.46    0.67
   0 -20  -6    1.61    0.33
   0 -20  -6    2.32    0.46
   0  20  -7    5.21    0.89
   0  20  -7    4.55    0.51
   0  20   7    6.11    0.87
   0  20   7    3.75    0.74
   0 -20  -7    3.73    0.61
   0 -20  -7    3.42    0.56
   0 -20  -7    5.30    0.95
   0 -20   7    4.38    0.87
   0 -20   7    4.95    0.99
   0  20  -8    0.47    0.90
   0  20   8    0.18    0.69
   0 -20  -8   -1.08    0.61
   0 -20   8   -0.18    0.97
   0 -20   8    1.15    0.84
   0  20   9   -0.31    0.84
   0  20  -9   -1.23    0.99
   0 -20  -9    0.86    0.83
   0 -20  -9    0.74    0.70
   0 -20   9    0.27    1.01
   0  21   0    0.36    0.28
   0  21   0    0.34    0.36
   0  21   0    0.50    0.16
   0  21   0    0.37    0.41
   0  21   0    0.12    0.26
   0 -21   0    0.51    0.33
   0 -21   0    0.15    0.49
   0 -21   0    0.78    0.63
   0 -21   0    0.07    0.36
   0 -21   0    0.41    0.18
   0 -21   0    0.27    0.42
   0 -21   0    0.34    0.28
   0 -21   0    0.27    0.21
   0  21  -1    3.07    0.49
   0  21   1    2.31    0.39
   0  21   1    3.19    0.68
   0  21  -1    2.72    0.36
   0  21  -1    3.51    0.54
   0  21   1    3.03    0.25
   0  21  -1    3.31    0.47
   0 -21   1    2.83    0.41
   0 -21   1    2.70    0.43
   0 -21  -1    2.49    0.49
   0 -21  -1    3.41    0.27
   0 -21  -1    3.25    0.49
   0 -21  -1    3.64    0.52
   0 -21   1    3.80    0.61
   0 -21  -1    3.21    0.62
   0 -21  -1    3.60    0.63
   0 -21   1    3.51    0.52
   0 -21  -1    3.26    1.01
   0  21  -2    2.43    0.37
   0  21   2    2.69    0.28
   0  21  -2    3.06    0.55
   0  21   2    3.01    0.66
   0  21   2    2.08    0.30
   0  21  -2    2.10    0.36
   0  21  -2    3.91    0.56
   0 -21   2    2.38    0.44
   0 -21  -2    2.17    0.51
   0 -21  -2    3.23    0.71
   0 -21  -2    2.29    0.38
   0 -21   2    1.68    0.39
   0 -21  -2    2.98    0.55
   0 -21  -2    1.53    0.49
   0  21  -3    4.00    0.52
   0  21  -3    4.89    0.62
   0  21  -3    5.30    0.66
   0  21   3    4.66    0.48
   0  21   3    4.36    0.39
   0  21  -3    5.91    0.73
   0 -21   3    4.76    0.69
   0 -21  -3    4.62    0.37
   0 -21   3    4.91    0.64
   0 -21  -3    6.12    0.75
   0 -21  -3    5.10    0.87
   0 -21  -3    5.94    0.92
   0 -21  -3    4.59    0.70
   0 -21  -3    5.03    0.60
   0  21  -4    2.73    0.55
   0  21  -4    2.56    0.52
   0  21   4    2.13    0.34
   0  21  -4    3.31    0.61
   0  21  -4    1.93    0.37
   0  21  -4    1.92    0.35
   0  21   4    1.44    0.35
   0 -21  -4    1.97    0.51
   0 -21  -4    1.92    0.47
   0 -21   4    2.53    0.60
   0 -21  -4    2.19    0.32
   0 -21  -4    1.37    0.56
   0 -21  -4    2.24    0.77
   0 -21   4    2.39    0.52
   0 -21  -4    1.93    0.27
   0  21   5    0.76    0.37
   0  21  -5    0.70    0.48
   0  21  -5    0.63    0.30
   0  21   5    1.04    0.45
   0  21  -5    0.98    0.50
   0  21  -5    0.82    0.32
   0  21   5    0.59    0.74
   0  21  -5    0.09    0.52
   0 -21  -5    0.05    0.43
   0 -21   5    0.91    0.54
   0 -21  -5    0.31    0.33
   0 -21  -5    0.54    0.27
   0 -21  -5    0.98    0.47
   0 -21   5    0.69    0.56
   0  21  -6   10.87    0.66
   0  21   6   10.42    0.87
   0  21  -6   10.53    1.13
   0  21   6   13.85    3.06
   0  21  -6   12.81    1.30
   0  21   6   10.44    1.02
   0 -21  -6   10.51    0.64
   0 -21  -6   10.65    1.07
   0 -21  -6   12.83    0.84
   0 -21   6   10.93    1.21
   0 -21   6   11.64    1.18
   0  21   7    0.77    0.58
   0  21  -7    2.01    0.76
   0  21  -7    0.31    0.43
   0  21  -7    1.00    0.33
   0 -21   7   -0.18    0.69
   0 -21   7    1.52    0.82
   0 -21  -7    1.20    0.64
   0 -21  -7    0.15    0.45
   0 -21  -7    0.65    0.37
   0  21  -8    7.86    1.49
   0  21   8    7.80    1.07
   0 -21   8    7.10    1.20
   0 -21  -8    7.93    1.05
   0 -21   8    6.11    1.99
   0 -21  -8    7.42    1.23
   0  21   9   -0.52    0.86
   0  21  -9   -0.62    1.07
   0 -21  -9    1.96    1.04
   0 -21   9   -0.11    1.04
   0 -21  -9    0.55    0.79
   0  22   0    0.38    0.33
   0  22   0    0.46    0.17
   0  22   0    0.82    0.40
   0  22   0    0.48    0.27
   0 -22   0    0.29    0.40
   0 -22   0    0.87    0.67
   0 -22   0    0.43    0.18
   0 -22   0   -0.31    0.28
   0 -22   0    0.65    0.49
   0 -22   0    0.36    0.37
   0 -22   0    0.40    0.24
   0 -22   0    0.16    0.31
   0  22   1    0.93    0.27
   0  22  -1    1.10    0.34
   0  22  -1    0.30    0.42
   0  22  -1    1.75    0.34
   0  22   1    1.21    0.18
   0 -22  -1    0.32    0.86
   0 -22  -1    0.73    0.41
   0 -22  -1    0.99    0.34
   0 -22  -1    0.82    0.44
   0 -22  -1    1.61    0.62
   0 -22  -1    0.72    0.38
   0 -22   1    1.12    0.48
   0 -22   1    0.91    0.30
   0 -22   1    1.04    0.31
   0 -22   1    0.69    0.29
   0  22  -2    0.33    0.34
   0  22  -2   -0.06    0.27
   0  22  -2   -0.18    0.41
   0  22  -2    0.05    0.28
   0  22   2   -0.01    0.21
   0  22   2    0.04    0.17
   0 -22   2   -0.28    0.31
   0 -22   2   -0.04    0.29
   0 -22  -2    0.04    0.44
   0 -22  -2    0.01    0.96
   0 -22  -2   -0.15    0.35
   0 -22  -2    0.11    0.30
   0 -22  -2    0.43    0.60
   0 -22  -2   -0.20    0.33
   0  22   3    0.16    0.22
   0  22   3    0.14    0.28
   0  22  -3    0.66    0.29
   0  22  -3    0.02    0.36
   0  22  -3    0.83    0.46
   0  22  -3    0.37    0.36
   0 -22  -3    0.22    0.53
   0 -22   3    0.14    0.47
   0 -22  -3    0.84    0.49
   0 -22  -3    0.46    0.19
   0 -22  -3    0.68    0.33
   0 -22  -3    1.52    0.71
   0 -22   3    0.29    0.38
   0 -22  -3    0.14    0.39
   0  22  -4   13.84    0.79
   0  22   4   12.77    0.69
   0  22  -4   12.51    1.01
   0  22  -4   13.70    1.00
   0  22  -4   14.29    1.06
   0  22   4   12.76    0.76
   0 -22  -4   13.55    0.65
   0 -22  -4   11.87    1.25
   0 -22  -4   12.21    0.90
   0 -22   4   12.68    1.05
   0 -22  -4   13.40    1.03
   0 -22  -4   13.64    1.32
   0 -22   4   12.25    1.00
   0  22  -5    4.16    0.79
   0  22   5    3.79    0.50
   0  22   5    4.35    0.64
   0  22  -5    3.98    0.64
   0  22  -5    3.10    0.43
   0  22  -5    3.62    0.66
   0 -22  -5    4.26    0.53
   0 -22   5    3.13    0.70
   0 -22  -5    3.18    0.44
   0 -22   5    3.31    0.67
   0 -22  -5    3.01    0.66
   0  22  -6    2.09    0.47
   0  22   6    1.80    0.61
   0  22  -6    1.99    0.36
   0  22   6    2.59    0.50
   0  22  -6    3.20    0.73
   0 -22   6    1.44    0.69
   0 -22   6    1.33    0.78
   0 -22  -6    1.99    0.45
   0 -22  -6    1.49    0.63
   0  22  -7    1.43    0.74
   0  22   7    0.55    0.62
   0  22  -7    0.38    0.43
   0 -22  -7    0.03    0.49
   0 -22   7   -0.09    0.83
   0 -22   7    0.62    0.77
   0 -22  -7    0.22    0.59
   0  22  -8    4.94    0.72
   0  22   8    3.90    0.87
   0 -22   8    5.34    1.10
   0 -22  -8    4.28    0.91
   0 -22  -8    6.06    1.00
   0  23   0    0.85    0.33
   0  23   0    1.08    0.27
   0  23   0    0.45    0.16
   0 -23   0    0.18    0.54
   0 -23   0    0.50    0.18
   0 -23   0   -0.12    0.41
   0 -23   0    0.17    0.32
   0 -23   0    0.26    0.22
   0 -23   0    0.82    0.46
   0 -23   0    1.23    0.77
   0 -23   0    0.73    0.35
   0  23  -1    0.33    0.27
   0  23  -1   -0.07    0.30
   0  23  -1   -0.07    0.39
   0  23   1    0.12    0.23
   0  23   1    0.16    0.15
   0 -23  -1   -1.08    0.54
   0 -23  -1   -0.27    0.34
   0 -23  -1    0.03    0.40
   0 -23   1   -0.27    0.23
   0 -23  -1   -0.53    0.29
   0 -23   1    0.01    0.27
   0 -23  -1    0.86    0.45
   0 -23   1   -0.45    0.26
   0 -23  -1    0.13    0.85
   0  23   2    1.23    0.26
   0  23  -2    1.23    0.35
   0  23  -2    1.35    0.41
   0  23   2    1.22    0.21
   0  23  -2    0.84    0.31
   0  23  -2    1.26    0.54
   0 -23  -2    0.89    1.08
   0 -23  -2    1.09    0.69
   0 -23   2    1.11    0.36
   0 -23  -2    1.80    0.45
   0 -23   2    1.04    0.39
   0 -23  -2    0.36    0.47
   0 -23  -2    0.83    0.33
   0 -23  -2    1.63    0.53
   0  23  -3    2.26    0.55
   0  23  -3    3.76    0.63
   0  23   3    2.57    0.37
   0  23   3    1.96    0.35
   0  23  -3    2.01    0.36
   0  23  -3    3.51    0.52
   0 -23  -3    1.98    0.64
   0 -23  -3    1.86    0.53
   0 -23  -3    1.95    0.44
   0 -23  -3    2.80    0.93
   0 -23  -3    3.01    0.63
   0 -23   3    2.06    0.49
   0  23  -4    1.41    0.56
   0  23   4    0.43    0.35
   0  23  -4    0.17    0.49
   0  23   4    0.80    0.31
   0  23  -4   -0.02    0.32
   0 -23  -4    0.56    0.24
   0 -23  -4    0.48    0.47
   0 -23  -4    0.68    0.25
   0 -23   4    0.62    0.54
   0 -23  -4    0.98    0.42
   0  23   5    0.49    0.35
   0  23  -5    0.98    0.58
   0  23   5    0.90    0.44
   0  23  -5    1.01    0.41
   0 -23  -5    0.48    0.49
   0 -23   5    1.03    0.63
   0 -23  -5    0.29    0.32
   0 -23   5    2.24    0.66
   0 -23  -5    1.20    0.34
   0  23  -6    0.62    0.61
   0  23   6    1.23    0.60
   0  23   6    0.35    0.54
   0  23  -6    0.74    0.40
   0 -23   6    1.67    0.76
   0 -23   6    1.37    0.74
   0 -23  -6    1.01    0.43
   0 -23  -6    0.89    0.34
   0 -23  -6    0.81    0.61
   0  23  -7    1.56    0.48
   0  23  -7    2.23    0.82
   0  23   7    0.77    0.72
   0 -23  -7    0.87    0.51
   0 -23  -7    0.78    0.62
   0 -23   7    0.17    0.78
   0  23  -8    1.33    0.63
   0  23   8    1.63    0.80
   0 -23  -8    1.28    0.84
   0 -23   8    2.23    1.03
   0 -23  -8   -0.11    0.62
   0  24   0    2.07    0.55
   0  24   0    1.92    0.44
   0  24   0    1.26    0.21
   0 -24   0    0.74    0.86
   0 -24   0    0.87    0.38
   0 -24   0    1.16    0.45
   0 -24   0    1.46    0.22
   0 -24   0    1.30    0.41
   0  24   1    0.88    0.19
   0  24  -1    0.54    0.33
   0  24   1    0.85    0.27
   0  24  -1    1.58    0.52
   0  24  -1    1.46    0.34
   0 -24   1    1.02    0.36
   0 -24  -1    1.22    0.38
   0 -24   1    0.85    0.30
   0 -24  -1    0.75    0.43
   0 -24  -1   -0.03    0.89
   0 -24  -1   -0.16    0.62
   0 -24  -1    1.14    0.50
   0 -24  -1    1.93    0.53
   0 -24   1    1.00    0.38
   0 -24   1    0.40    0.76
   0  24   2    6.69    0.41
   0  24  -2    7.33    0.60
   0  24  -2    7.00    0.63
   0  24   2    7.75    0.47
   0  24  -2    7.07    0.73
   0  24  -2    8.07    0.88
   0 -24  -2    8.13    0.79
   0 -24   2    7.06    0.67
   0 -24  -2    7.17    0.83
   0 -24  -2    5.91    0.73
   0 -24  -2    7.42    1.00
   0 -24   2    8.45    0.71
   0  24  -3    0.81    0.36
   0  24  -3    2.00    0.57
   0  24  -3    1.41    0.51
   0  24   3    1.29    0.30
   0  24   3    1.59    0.28
   0  24  -3    1.16    0.43
   0 -24   3    1.08    0.49
   0 -24  -3    1.63    0.49
   0 -24  -3    1.70    0.53
   0 -24  -3    2.86    0.90
   0 -24  -3    0.85    0.65
   0 -24   3    1.69    0.48
   0 -24  -3    0.72    0.56
   0  24   4    2.66    0.44
   0  24  -4    2.34    0.62
   0  24   4    3.72    0.47
   0  24  -4    2.45    0.58
   0  24  -4    2.78    0.47
   0 -24   4    3.71    0.65
   0 -24   4    1.96    0.61
   0 -24  -4    1.90    0.58
   0  24   5    0.40    0.45
   0  24  -5    0.95    0.39
   0  24  -5    1.10    0.56
   0  24   5    1.45    0.38
   0 -24  -5    1.09    0.32
   0 -24   5    0.88    0.64
   0 -24  -5    0.70    0.29
   0 -24  -5    0.75    0.58
   0 -24   5    0.82    0.65
   0  24   6    3.09    0.64
   0  24   6    4.46    0.71
   0  24  -6    3.41    0.53
   0  24  -6    4.71    0.80
   0 -24  -6    3.21    0.56
   0 -24   6    2.64    0.81
   0 -24   6    1.80    0.86
   0 -24  -6    4.22    0.63
   0 -24  -6    4.21    0.88
   0  24  -7    0.37    0.50
   0  24   7    0.48    0.64
   0  24  -7    1.54    0.81
   0 -24  -7    0.24    0.49
   0 -24   7    1.82    0.96
   0 -24  -7    0.03    0.76
   0  24  -8    0.84    0.63
   0  24   8    2.65    1.22
   0 -24   8    1.25    1.06
   0 -24  -8   -0.38    0.94
   0 -24  -8   -0.42    0.63
   0  25   0    0.16    0.18
   0  25   0    0.46    0.30
   0 -25   0    0.63    0.39
   0 -25   0    0.76    0.51
   0 -25   0   -0.43    0.34
   0 -25   0    0.78    0.29
   0 -25   0    0.55    0.17
   0 -25   0    0.79    0.45
   0  25  -1    0.35    0.33
   0  25  -1    0.26    0.33
   0  25  -1    0.31    0.50
   0  25   1    0.42    0.18
   0  25   1    1.09    0.27
   0 -25  -1    1.17    0.43
   0 -25  -1    0.78    0.53
   0 -25  -1    0.41    1.11
   0 -25  -1    0.97    0.50
   0 -25   1    0.54    0.26
   0 -25  -1    1.52    0.46
   0 -25   1    0.65    0.39
   0 -25   1    0.22    0.74
   0 -25  -1    0.87    0.71
   0 -25   1    0.22    0.31
   0  25  -2   -0.36    0.29
   0  25  -2    1.04    0.65
   0  25  -2    0.06    0.37
   0  25  -2    0.35    0.33
   0 -25  -2   -0.27    0.73
   0 -25  -2    0.01    0.45
   0 -25  -2    0.16    0.58
   0 -25   2    0.19    0.38
   0 -25  -2    0.25    0.47
   0 -25   2   -0.14    0.35
   0 -25  -2    0.15    0.37
   0  25  -3    0.26    0.38
   0  25  -3   -0.34    0.48
   0  25  -3    0.03    0.33
   0 -25  -3    1.04    0.90
   0 -25   3    0.16    0.47
   0 -25  -3    0.00    0.45
   0 -25   3   -0.20    0.44
   0 -25  -3   -0.63    0.53
   0 -25  -3   -0.01    0.41
   0  25  -4    1.28    0.52
   0  25   4    1.08    0.30
   0  25   4    0.49    0.36
   0  25  -4    0.77    0.44
   0 -25   4    0.60    0.56
   0 -25  -4    0.55    0.58
   0 -25   4    0.22    0.55
   0  25  -5    0.14    0.61
   0  25  -5    1.13    0.42
   0  25   5    1.75    0.46
   0  25   5    0.75    0.52
   0 -25   5    2.13    0.68
   0 -25  -5    1.57    0.66
   0 -25   5    1.93    0.70
   0  25  -6    5.10    0.89
   0  25  -6    2.73    0.56
   0 -25  -6    3.69    0.63
   0 -25   6    5.29    0.94
   0 -25  -6    5.41    0.95
   0  25   7    5.85    0.93
   0  25  -7    5.61    1.12
   0  25  -7    4.58    0.67
   0 -25   7    3.77    1.03
   0 -25  -7    4.93    0.83
   0 -25  -7    7.61    1.31
   0  26   0    3.25    0.33
   0  26   0    4.21    0.51
   0 -26   0    3.53    0.55
   0 -26   0    4.03    0.63
   0 -26   0    2.79    0.66
   0  26   1    3.96    0.33
   0  26   1    4.70    0.44
   0  26  -1    4.42    0.70
   0  26  -1    3.69    0.62
   0  26  -1    3.81    0.42
   0 -26   1    4.21    0.46
   0 -26  -1    4.51    0.72
   0 -26   1    3.62    0.56
   0 -26  -1    2.70    0.50
   0 -26  -1    4.54    0.94
   0 -26   1    3.71    1.09
   0 -26  -1    5.79    0.74
   0 -26   1    4.63    0.66
   0 -26  -1    3.14    0.67
   0  26  -2    2.84    0.51
   0  26  -2    2.70    0.48
   0  26  -2    2.82    0.43
   0 -26  -2    3.37    0.56
   0 -26  -2    0.85    1.32
   0 -26  -2    1.07    0.89
   0 -26  -2    3.35    0.61
   0 -26   2    3.33    0.53
   0 -26  -2    2.01    0.68
   0 -26   2    2.65    0.45
   0 -26  -2    3.28    0.74
   0  26  -3    0.89    0.53
   0  26  -3    0.08    0.36
   0 -26   3    0.59    0.53
   0 -26  -3    1.34    0.65
   0 -26   3    0.59    0.47
   0 -26  -3    0.32    0.61
   0  26   4   -0.37    0.34
   0  26  -4    0.31    0.54
   0  26  -4    0.38    0.34
   0 -26   4    0.57    0.56
   0 -26   4    0.12    0.53
   0 -26  -4    1.23    0.55
   0  26   5   -0.07    0.48
   0  26  -5    0.65    0.63
   0  26  -5    0.69    0.41
   0 -26  -5    0.59    0.61
   0 -26   5    0.64    0.70
   0  26  -6    1.89    0.83
   0  26  -6    1.81    0.51
   0 -26  -6    2.27    0.79
   0 -26   6    1.65    0.90
   0  26  -7    2.29    0.63
   0 -26  -7    2.66    0.59
   0 -26   7    3.31    1.03
   0 -26  -7    2.74    0.90
   0  27   0   -0.05    0.21
   0 -27   0    0.12    0.88
   0 -27   0    0.98    0.46
   0 -27   0   -0.53    0.50
   0 -27   0   -0.23    0.52
   0  27  -1    2.09    0.55
   0  27  -1    1.99    0.31
   0  27  -1    2.45    0.48
   0 -27  -1    0.47    0.48
   0 -27  -1    0.75    0.57
   0 -27   1    1.45    0.31
   0 -27   1    2.23    0.49
   0 -27  -1    2.77    0.57
   0 -27  -1    0.75    0.65
   0 -27  -1    0.22    1.06
   0 -27   1    1.98    1.12
   0 -27   1    1.78    0.48
   0  27  -2   10.84    0.81
   0  27  -2   12.32    0.92
   0 -27   2   12.55    0.78
   0 -27  -2   14.16    1.16
   0 -27   2   12.52    0.84
   0 -27  -2   10.88    1.10
   0 -27   2   11.96    0.87
   0  27  -3   -0.10    0.35
   0  27  -3    0.32    0.66
   0 -27  -3   -1.27    0.66
   0 -27   3   -0.55    0.45
   0 -27  -3    0.95    0.58
   0 -27   3   -0.25    0.45
   0  27  -4   -0.24    0.51
   0  27  -4   -0.19    0.36
   0 -27  -4    0.31    0.58
   0 -27   4    1.53    0.62
   0  27  -5   -0.35    0.42
   0  27  -5    0.58    0.80
   0 -27   5    2.37    0.80
   0 -27  -5    0.21    0.69
   0  27  -6    0.11    0.50
   0 -27   6    0.29    0.89
   0 -27  -6    0.12    0.76
   0  27  -7    1.84    0.61
   0 -27  -7    0.66    0.85
   0 -27   7    0.97    1.07
   0  28   0    1.58    0.36
   0  28   0    0.90    0.25
   0 -28   0    0.61    1.08
   0 -28   0    0.47    0.61
   0 -28   0    0.97    0.51
   0 -28   0    0.92    0.61
   0  28  -1    1.18    0.46
   0  28  -1    0.73    0.30
   0 -28   1    0.69    0.28
   0 -28  -1    0.62    0.67
   0 -28  -1    1.08    0.74
   0 -28  -1    0.34    0.58
   0 -28  -1    0.55    1.24
   0 -28   1    2.04    0.53
   0 -28   1    0.16    0.96
   0  28  -2    0.68    0.39
   0  28  -2   -0.61    0.48
   0 -28   2    0.18    0.39
   0 -28   2   -0.32    0.36
   0 -28   2   -0.08    0.45
   0 -28  -2    0.09    0.64
   0 -28  -2   -0.16    0.57
   0 -28   2    0.00    0.93
   0 -28  -2    0.53    1.41
   0  28  -3   -0.16    0.55
   0  28  -3    0.35    0.40
   0 -28   3    0.68    0.69
   0 -28  -3    0.16    0.58
   0  28  -4    2.04    0.50
   0 -28   4    2.64    0.70
   0 -28  -4    2.92    0.75
   0  28  -5    1.02    0.49
   0 -28   5    0.34    0.73
   0 -28  -5    1.60    0.73
   0  28  -6    0.65    0.54
   0 -28   6   -0.07    0.91
   0 -28  -6    2.64    0.96
   0  29   0    0.21    0.35
   0  29   0    0.13    0.32
   0 -29   0    0.77    1.09
   0 -29   0    0.30    0.55
   0 -29   0    0.14    0.65
   0  29  -1    2.09    0.50
   0  29  -1    1.10    0.52
   0 -29  -1    1.46    0.65
   0 -29   1    1.38    0.27
   0 -29  -1    2.17    0.73
   0 -29   1    1.59    1.17
   0 -29   1    2.40    0.58
   0 -29  -1   -0.13    1.27
   0  29  -2    6.84    0.82
   0 -29   2    7.24    1.83
   0 -29  -2    7.40    1.12
   0 -29  -2    6.20    1.07
   0 -29   2    7.28    0.79
   0 -29   2    7.83    0.88
   0 -29   2    5.65    0.68
   0  29  -3   13.27    1.02
   0 -29  -3   13.83    1.37
   0 -29   3   16.83    1.05
   0 -29   3   13.53    1.01
   0  29  -4    0.49    0.46
   0 -29   4    0.40    0.62
   0 -29  -4    0.24    0.67
   0  29  -5    6.00    0.88
   0 -29   5    6.90    0.96
   0 -29  -5    8.45    1.35
   0  29  -6    0.09    0.56
   0 -29  -6    0.60    1.24
   0 -29   6    1.30    0.95
   0 -30   0    4.96    1.54
   0 -30   0    5.43    0.81
   0 -30   0    5.57    1.03
   0  30  -1    1.43    0.47
   0 -30   1    2.08    0.62
   0 -30  -1    1.30    0.77
   0 -30   1    0.08    1.08
   0 -30  -1    0.19    0.65
   0 -30  -1    1.17    1.41
   0  30  -2    2.04    0.57
   0  30  -2    4.71    0.97
   0 -30   2    3.02    0.46
   0 -30  -2    4.29    0.83
   0 -30  -2    3.58    0.84
   0 -30   2    4.09    1.39
   0  30  -3    1.76    0.57
   0 -30  -3    3.08    0.89
   0  30  -4    5.69    0.89
   0 -30  -4    6.88    1.11
   0 -30   4    5.33    0.82
   0  30  -5    0.83    0.60
   0 -30   5    1.38    0.97
   0 -31   0    0.00    1.40
   0 -31   1   -0.32    1.31
   0 -31  -1    0.13    0.78
   0 -31   1   -0.07    0.04
   0 -31  -1    0.81    1.47
   0  31  -2    6.77    0.98
   0 -31   2    4.34    0.64
   0 -31  -2    3.59    0.95
   0 -31  -2    2.00    2.02
   0 -31   2    2.99    1.48
   0  31  -3    1.87    0.57
   0 -31  -3    1.63    0.79
   0 -31   3    1.22    0.56
   0  31  -4   -0.20    0.56
   0 -31   4   -1.08    0.72
   0 -32   0    1.58    1.72
   0 -32   1    0.10    1.35
   0 -32  -1    1.02    2.01
   0 -32  -1   -0.56    0.82
   0  32  -2    1.51    0.61
   0 -32  -2    1.38    0.88
   0 -32   2    0.13    1.23
   0 -32  -2    0.21    2.15
   0  32  -3    0.75    0.63
   0 -32   3    0.79    0.56
   0 -32   3   -0.33    1.41
   0 -33   0    1.38    1.97
   0 -33  -1    2.86    1.06
   0 -33  -1    1.12    1.99
   0 -33   1    2.04    1.70
   0  33  -2    1.00    0.69
   0 -33   2   -0.65    1.41
   0 -33  -2    2.23    2.31
   0 -34   0    1.02    1.96
  -1   0  11    0.03    0.94
   1   0 -11    1.34    0.89
  -1   0  11    0.03    0.99
  -1   0  10    3.86    0.93
  -1   0  10    2.19    0.91
   1   0 -10    1.95    0.82
   1   0 -10    2.05    0.80
  -1   0   9   -0.64    0.67
   1   0  -9    0.21    0.55
  -1   0   9   -1.07    0.59
   1   0  -9    0.16    0.50
   1   0  -9    0.19    0.56
   1   0  -8   40.21    1.86
  -1   0   8   40.15    1.88
   1   0  -8   39.24    1.64
  -1   0   8   35.95    1.75
  -1   0   8   38.49    1.89
   1   0  -8   35.41    1.79
  -1   0   7    0.27    0.40
   1   0  -7   -0.23    0.33
   1   0  -7   -0.28    0.35
  -1   0   7   -0.21    0.40
   1   0  -7   -0.17    0.39
   1   0  -6    6.41    0.67
   1   0  -6    5.59    0.58
  -1   0   6    7.68    0.75
   1   0  -6    6.27    0.62
  -1   0   6    6.54    0.66
   1   0  -5   -0.25    0.21
   1   0  -5   -0.02    0.24
   1   0  -5    0.09    0.22
  -1   0   5   -0.29    0.24
  -1   0   5    0.26    0.24
   1   0  -4   48.18    1.70
  -1   0   4   47.91    1.70
   1   0  -4   49.69    1.72
  -1   0   4   49.88    1.74
   1   0  -4   48.64    1.64
   1   0  -3   -0.17    0.16
   1   0  -3    0.01    0.14
  -1   0   3    0.01    0.18
  -1   0   3   -0.02    0.12
  -1   0   2   95.74    2.80
  -1   0   2   94.08    2.80
   1   0  -2   93.69    2.80
  -1   0   2   91.35    2.79
   1   0  -2   96.36    2.80
  -1   0   1   -0.07    0.06
  -1   0   1    0.02    0.06
   1   0  -1    0.02    0.07
  -1   0   1   -0.05    0.04
   1   0  -1    0.01    0.06
   1   0  -1   -0.05    0.04
  -1   0   1   -0.06    0.06
   1   0  -1    0.00    0.06
   1   0   1    0.17    0.06
  -1   0  -1    0.26    0.07
  -1   0  -1    0.04    0.05
   1   0   2  756.96   21.39
  -1   0  -2  712.04   20.96
   1   0   2  754.31   21.27
   1   0   2  743.15   21.18
   1   0   3   -0.11    0.13
  -1   0  -3    0.02    0.11
   1   0   3    0.00    0.13
  -1   0  -3    0.11    0.15
  -1   0  -3   -0.04    0.15
   1   0   3    0.07    0.14
  -1   0  -4    0.32    0.22
   1   0   4    0.07    0.21
   1   0   4    0.22    0.18
  -1   0  -4    0.40    0.22
  -1   0  -4    0.18    0.18
   1   0   4    0.15    0.19
   1   0   5   -0.12    0.21
  -1   0  -5    0.22    0.24
  -1   0  -5    0.29    0.26
   1   0   5    0.23    0.29
  -1   0  -5    0.03    0.21
   1   0   5   -0.32    0.24
  -1   0  -6   21.00    1.06
  -1   0  -6   21.56    1.00
  -1   0  -6   22.08    1.15
   1   0   6   20.48    1.12
   1   0   6   22.28    1.09
  -1   0  -7    0.14    0.35
  -1   0  -7    0.15    0.39
   1   0   7    0.09    0.35
  -1   0  -7   -0.15    0.41
   1   0   7    0.63    0.44
  -1   0  -8   33.72    1.60
  -1   0  -8   35.76    1.74
   1   0   8   34.14    1.71
  -1   0  -8   30.20    1.43
   1   0   8   31.35    1.62
  -1   0  -9    0.23    0.57
  -1   0  -9   -0.87    0.56
  -1   0 -10    0.63    0.75
   1   0  10    0.99    0.84
   1   0  11    0.49    1.07
  -1   0 -11    2.11    0.93
   1   0  11   -1.84    1.00
  -1   1  11    0.42    1.03
   1   1 -11    0.43    0.93
  -1   1  11    1.56    1.07
  -1  -1  11    0.08    0.96
   1  -1 -11   -0.27    0.84
  -1  -1  11    1.94    0.95
   1   1 -10    1.29    0.79
   1   1 -10    1.87    0.67
  -1   1  10    2.57    0.87
  -1   1  10    0.87    0.82
   1  -1 -10    2.40    0.86
  -1  -1  10    3.13    0.87
   1  -1 -10    1.01    0.85
  -1  -1  10    1.90    0.94
   1  -1 -10    2.15    0.83
   1   1  -9    1.26    0.59
   1   1  -9    0.11    0.58
  -1   1   9    0.35    0.70
   1   1  -9    1.17    0.63
  -1   1   9    0.80    0.62
  -1  -1   9    1.66    0.73
   1  -1  -9    0.85    0.63
   1  -1  -9    1.85    0.66
  -1  -1   9    0.88    0.75
   1  -1  -9    1.38    0.60
   1   1  -8   20.76    1.33
  -1   1   8   20.42    1.38
   1   1  -8   21.10    1.13
  -1   1   8   21.19    1.40
  -1   1   8   16.12    1.20
   1   1  -8   20.64    1.24
   1  -1  -8   21.63    1.18
   1  -1  -8   20.37    1.30
  -1  -1   8   22.53    1.41
  -1  -1   8   17.93    1.24
   1  -1  -8   19.11    1.25
   1   1  -7    5.46    0.72
   1   1  -7    6.31    0.76
  -1   1   7    5.50    0.92
   1   1  -7    6.53    0.67
  -1   1   7    6.45    0.81
  -1   1   7    6.70    0.77
   1  -1  -7    5.99    0.68
  -1  -1   7    6.21    0.75
  -1  -1   7    6.80    0.89
   1  -1  -7    6.56    0.70
   1  -1  -7    6.16    0.75
   1   1  -6    2.82    0.48
  -1   1   6    2.42    0.50
  -1   1   6    1.44    0.39
   1   1  -6    1.70    0.45
   1   1  -6    1.91    0.38
   1  -1  -6    2.02    0.45
   1  -1  -6    1.82    0.51
   1  -1  -6    2.51    0.45
  -1  -1   6    1.58    0.38
  -1  -1   6    1.80    0.47
   1   1  -5    4.70    0.48
  -1   1   5    5.05    0.49
   1   1  -5    4.73    0.54
   1   1  -5    4.71    0.43
  -1   1   5    4.90    0.54
   1  -1  -5    6.01    0.52
  -1  -1   5    4.44    0.50
   1  -1  -5    5.14    0.48
  -1  -1   5    5.53    0.58
   1  -1  -5    4.63    0.51
  -1   1   4   19.91    0.90
   1   1  -4   22.96    0.87
   1   1  -4   21.57    0.92
  -1   1   4   21.68    0.94
   1   1  -4   21.45    0.95
  -1  -1   4   19.87    0.94
  -1  -1   4   19.94    0.91
   1  -1  -4   21.07    0.93
   1  -1  -4   20.93    0.90
   1  -1  -4   21.28    0.89
  -1   1   3   87.57    2.67
  -1   1   3   88.22    2.67
  -1   1   3   86.80    2.65
   1   1  -3   85.00    2.66
   1  -1  -3   88.62    2.66
  -1  -1   3   80.69    2.65
   1  -1  -3   85.83    2.65
  -1  -1   3   86.69    2.70
  -1   1   2   74.28    2.29
  -1   1   2   78.27    2.32
   1   1  -2   76.90    2.32
   1   1  -2   77.60    2.32
  -1   1   2   74.69    2.30
   1  -1  -2   77.27    2.30
  -1  -1   2   76.10    2.32
   1  -1  -2   76.53    2.29
  -1   1   1   50.93    1.55
   1   1  -1   52.90    1.50
  -1   1   1   52.48    1.55
   1   1  -1   53.67    1.58
  -1   1   1   52.28    1.54
  -1   1   1   52.81    1.55
   1   1  -1   52.62    1.56
   1  -1  -1   52.71    1.54
  -1  -1   1   51.69    1.56
   1  -1  -1   51.68    1.55
  -1  -1   1   55.30    1.59
   1  -1  -1   50.40    1.55
  -1  -1   1   52.21    1.54
  -1  -1   1   53.61    1.50
   1  -1  -1   52.08    1.54
   1   1   1  219.01    6.26
  -1   1  -1  208.35    6.10
   1   1   1  226.65    6.30
  -1   1  -1  221.66    6.25
  -1  -1  -1  207.90    6.11
   1  -1   1  224.64    6.23
  -1  -1  -1  230.59    6.32
   1  -1   1  198.01    6.11
   1   1   2    4.33    0.39
  -1  -1  -2    6.41    0.38
   1  -1   2    5.73    0.34
   1   1   3    7.12    0.43
   1   1   3    7.48    0.45
  -1   1  -3    7.02    0.45
  -1   1  -3    6.81    0.42
  -1   1  -3    7.34    0.39
   1   1   3    7.81    0.43
  -1  -1  -3    7.26    0.42
  -1  -1  -3    7.17    0.44
  -1  -1  -3    7.99    0.46
   1  -1   3    6.95    0.44
  -1   1  -4    5.71    0.40
   1   1   4    6.03    0.46
   1   1   4    5.73    0.47
   1   1   4    5.55    0.45
  -1   1  -4    5.22    0.48
  -1   1  -4    5.66    0.45
  -1  -1  -4    6.04    0.48
  -1  -1  -4    6.31    0.44
   1  -1   4    5.32    0.48
   1  -1   4    5.92    0.45
  -1  -1  -4    5.32    0.43
   1  -1   4    6.07    0.40
   1   1   5    6.02    0.52
  -1   1  -5    6.45    0.58
  -1   1  -5    5.65    0.53
  -1   1  -5    6.71    0.50
   1   1   5    5.05    0.51
   1   1   5    5.23    0.55
  -1  -1  -5    5.59    0.56
   1  -1   5    5.86    0.58
  -1  -1  -5    5.19    0.49
   1  -1   5    5.43    0.51
  -1  -1  -5    5.40    0.50
   1   1   6    0.62    0.36
  -1   1  -6    0.32    0.28
   1   1   6    0.32    0.30
  -1   1  -6    0.30    0.33
  -1   1  -6    0.74    0.29
  -1  -1  -6    0.40    0.32
  -1  -1  -6    0.03    0.28
   1  -1   6   -0.20    0.33
   1  -1   6   -0.37    0.30
  -1  -1  -6    0.37    0.28
  -1   1  -7    2.34    0.46
   1   1   7    1.78    0.52
   1   1   7    1.18    0.39
  -1   1  -7    1.75    0.54
  -1   1  -7    1.72    0.48
   1  -1   7    1.46    0.50
   1  -1   7    2.48    0.53
  -1  -1  -7    2.19    0.46
  -1  -1  -7    1.13    0.45
  -1  -1  -7    2.60    0.52
  -1   1  -8    0.65    0.47
   1   1   8    0.93    0.55
   1   1   8    1.07    0.50
  -1   1  -8    1.12    0.47
   1  -1   8    0.53    0.45
  -1  -1  -8    0.97    0.49
   1  -1   8    0.91    0.56
  -1  -1  -8    0.45    0.46
  -1  -1  -8    0.91    0.51
  -1   1  -9    9.51    1.12
  -1   1  -9    9.64    1.23
   1   1   9    8.97    1.29
  -1  -1  -9    8.55    1.07
  -1  -1  -9    8.22    1.10
   1  -1   9    8.68    1.26
   1   1  10   11.02    1.45
  -1   1 -10   10.24    1.41
  -1  -1 -10    9.93    1.36
   1  -1  10   10.22    1.52
  -1   1 -11    1.63    0.93
   1   1  11    0.62    1.09
   1   1  11    2.11    1.06
  -1  -1 -11    2.04    0.94
   1  -1  11    1.25    1.06
   1   2 -11    1.35    0.98
  -1   2  11   -0.57    1.03
  -1   2  11    4.01    1.08
   1  -2 -11    2.92    0.98
  -1  -2  11    2.10    1.03
  -1  -2  11    2.27    1.05
   1   2 -10    3.10    0.70
   1   2 -10    2.18    0.80
  -1   2  10    3.87    0.90
  -1   2  10    1.21    0.81
   1  -2 -10    3.31    1.11
   1  -2 -10    2.30    0.90
   1  -2 -10    1.63    0.76
  -1  -2  10    0.85    0.90
  -1  -2  10    3.50    0.86
   1   2  -9   -0.26    0.64
   1   2  -9    0.70    0.62
  -1   2   9    0.92    0.66
   1   2  -9    0.64    0.55
  -1   2   9    0.23    0.60
  -1  -2   9   -0.23    0.70
   1  -2  -9   -0.11    0.53
   1  -2  -9   -0.56    0.57
   1  -2  -9    1.26    0.62
  -1  -2   9   -0.59    0.71
  -1   2   8    1.01    0.51
   1   2  -8   -0.03    0.47
  -1   2   8    0.17    0.54
  -1   2   8    0.45    0.53
   1   2  -8    0.61    0.50
   1   2  -8    0.91    0.43
   1  -2  -8    0.95    0.47
  -1  -2   8    0.88    0.54
  -1  -2   8    0.16    0.53
   1  -2  -8    1.33    0.50
   1  -2  -8    0.66    0.47
  -1   2   7    0.30    0.39
  -1   2   7    0.90    0.42
  -1   2   7    2.14    0.61
   1   2  -7    0.88    0.46
   1   2  -7    0.72    0.37
   1   2  -7    0.80    0.40
   1  -2  -7    0.37    0.42
  -1  -2   7    0.66    0.49
  -1  -2   7    0.87    0.48
   1  -2  -7    1.19    0.39
   1  -2  -7    0.66    0.40
   1   2  -6   27.75    1.33
   1   2  -6   27.80    1.28
   1   2  -6   27.94    1.14
  -1   2   6   27.35    1.25
  -1   2   6   28.08    1.35
  -1   2   6   28.78    1.34
  -1  -2   6   26.79    1.29
   1  -2  -6   28.42    1.31
   1  -2  -6   26.86    1.36
  -1  -2   6   28.54    1.37
   1  -2  -6   27.74    1.24
   1   2  -5    1.30    0.29
  -1   2   5    1.45    0.34
  -1   2   5    1.22    0.29
   1   2  -5    1.20    0.32
  -1   2   5    1.37    0.38
   1   2  -5    1.65    0.34
   1  -2  -5    1.31    0.29
   1  -2  -5    1.85    0.37
  -1  -2   5    1.23    0.34
   1  -2  -5    1.30    0.33
  -1  -2   5    1.48    0.32
  -1   2   4   41.68    1.52
  -1   2   4   42.61    1.50
   1   2  -4   39.35    1.49
   1   2  -4   41.96    1.52
  -1   2   4   39.34    1.46
   1  -2  -4   42.09    1.47
  -1  -2   4   38.87    1.48
   1  -2  -4   41.22    1.47
   1  -2  -4   40.62    1.48
  -1  -2   4   43.91    1.55
  -1   2   3   66.35    2.13
   1   2  -3   66.85    2.14
  -1   2   3   67.31    2.14
  -1   2   3   65.88    2.10
   1   2  -3   69.12    2.15
  -1  -2   3   65.71    2.15
  -1  -2   3   67.10    2.14
   1  -2  -3   67.19    2.11
   1  -2  -3   65.12    2.11
   1  -2  -3   68.17    2.13
   1   2  -2  156.31    4.51
   1   2  -2  156.86    4.51
  -1   2   2  152.35    4.46
  -1   2   2  155.13    4.48
  -1   2   2  152.89    4.45
   1  -2  -2  154.43    4.46
   1  -2  -2  152.43    4.46
  -1  -2   2  152.01    4.50
   1  -2  -2  159.76    4.50
  -1  -2   2  157.92    4.51
  -1   2   1  196.02    5.32
  -1   2   1  187.62    5.36
  -1   2   1  179.07    5.26
   1   2  -1  184.16    5.30
   1   2  -1  181.26    5.28
  -1   2   1  185.48    5.27
   1  -2  -1  183.22    5.24
   1  -2  -1  184.93    5.27
  -1  -2   1  181.04    5.28
  -1  -2   1  196.71    5.22
   1  -2  -1  191.43    5.33
   1  -2  -1  188.37    5.27
  -1  -2   1  183.20    5.30
   1   2   0    1.01    0.14
  -1   2   0    0.82    0.08
   1   2   0    0.82    0.08
   1   2   0    0.73    0.08
   1   2   0    0.85    0.10
  -1   2   0    0.79    0.06
   1  -2   0    0.82    0.06
   1  -2   0    0.77    0.08
   1  -2   0    0.98    0.07
  -1  -2   0    0.91    0.09
  -1  -2   0    0.83    0.10
  -1  -2   0    0.89    0.09
   1   2   1  220.00    5.90
  -1   2  -1  200.85    5.76
  -1   2  -1  196.78    5.75
   1   2   1  198.61    5.78
   1   2   1  195.93    5.74
  -1  -2  -1  218.22    5.87
   1  -2   1  201.14    5.75
   1  -2   1  199.68    5.75
  -1   2  -2  163.27    5.20
   1   2   2  173.35    5.13
   1   2   2  178.29    5.09
  -1   2  -2  181.95    5.11
  -1  -2  -2  182.93    5.11
  -1  -2  -2  179.43    5.07
   1  -2   2  176.72    5.00
  -1  -2  -2  180.65    5.12
   1  -2   2  180.43    5.12
   1  -2   2  175.66    5.11
   1   2   3   33.81    1.18
   1   2   3   32.59    1.16
  -1   2  -3   33.04    1.21
  -1   2  -3   31.98    1.17
   1   2   3   33.21    1.18
  -1  -2  -3   33.16    1.17
   1  -2   3   32.69    1.07
   1  -2   3   32.82    1.20
  -1  -2  -3   33.31    1.19
  -1  -2  -3   33.83    1.15
   1  -2   3   32.27    1.18
   1   2   4    2.49    0.37
   1   2   4    1.76    0.30
  -1   2  -4    2.07    0.32
  -1   2  -4    2.71    0.29
   1   2   4    2.47    0.33
  -1   2  -4    2.21    0.38
  -1  -2  -4    2.23    0.36
   1  -2   4    2.22    0.34
   1  -2   4    2.40    0.28
   1  -2   4    1.85    0.31
  -1  -2  -4    2.21    0.36
  -1  -2  -4    2.27    0.31
   1   2   5    1.71    0.38
   1   2   5    2.31    0.38
  -1   2  -5    1.53    0.35
   1   2   5    1.98    0.34
  -1   2  -5    2.46    0.37
  -1   2  -5    2.34    0.55
  -1  -2  -5    2.47    0.39
  -1  -2  -5    2.55    0.41
   1  -2   5    1.55    0.35
  -1  -2  -5    1.83    0.38
   1  -2   5    2.08    0.36
  -1   2  -6    0.69    0.35
  -1   2  -6    1.16    0.31
   1   2   6    0.61    0.31
   1   2   6    0.17    0.31
  -1   2  -6    0.52    0.36
   1  -2   6   -0.08    0.35
  -1  -2  -6    0.51    0.29
   1  -2   6    0.05    0.29
  -1  -2  -6    0.49    0.34
  -1  -2  -6    0.95    0.35
   1   2   7   14.93    0.98
   1   2   7   16.47    1.06
  -1   2  -7   14.99    1.07
  -1   2  -7   13.38    0.82
  -1   2  -7   15.15    0.97
  -1  -2  -7   14.18    0.96
   1  -2   7   15.23    1.06
  -1  -2  -7   15.02    1.05
  -1  -2  -7   15.38    0.96
   1  -2   7   14.91    1.01
   1   2   8    3.39    0.67
   1   2   8    2.88    0.62
  -1   2  -8    4.11    0.74
  -1   2  -8    3.18    0.61
  -1  -2  -8    4.37    0.66
   1  -2   8    2.98    0.62
  -1  -2  -8    3.92    0.68
  -1  -2  -8    3.84    1.06
   1  -2   8    3.92    0.73
   1   2   9    0.07    0.69
  -1   2  -9    0.18    0.61
  -1  -2  -9    0.60    0.59
  -1  -2  -9    0.23    0.55
  -1  -2  -9   -0.28    0.58
   1  -2   9    1.19    0.68
   1   2  10    0.64    0.86
   1   2  10    0.83    0.90
  -1   2 -10   -0.68    0.74
  -1  -2 -10    0.82    0.72
   1  -2  10    0.86    0.82
  -1   2 -11    6.59    1.21
   1   2  11    3.61    1.30
   1   2  11    4.89    1.22
  -1  -2 -11    5.86    1.14
   1  -2  11    5.37    1.14
  -1   3  11    3.58    1.13
  -1   3  11    1.92    1.02
   1   3 -11    1.59    1.08
   1  -3 -11    2.05    0.94
  -1  -3  11    0.50    0.97
  -1  -3  11    1.64    1.05
  -1   3  10   -0.37    0.74
   1   3 -10    1.81    0.82
  -1   3  10    0.03    0.78
   1   3 -10    1.44    0.63
   1  -3 -10    0.78    0.63
   1  -3 -10    0.38    0.78
   1  -3 -10    1.77    0.91
  -1  -3  10    2.01    0.88
  -1  -3  10    1.29    0.87
   1   3  -9    7.44    1.11
   1   3  -9    6.92    1.20
  -1   3   9    9.44    1.14
   1   3  -9    9.95    1.17
  -1   3   9    7.40    1.12
   1  -3  -9    8.25    1.06
   1  -3  -9    9.95    1.12
   1  -3  -9    7.36    1.02
  -1  -3   9    7.83    1.36
  -1   3   8   11.41    1.09
   1   3  -8   10.76    1.05
  -1   3   8   11.11    1.05
   1   3  -8   12.06    0.89
   1   3  -8   10.56    1.01
  -1   3   8    9.49    0.93
   1  -3  -8   12.36    1.01
   1  -3  -8   13.54    1.04
  -1  -3   8   10.29    1.08
   1  -3  -8   13.08    1.08
  -1  -3   8   10.60    1.05
  -1   3   7    2.66    0.59
  -1   3   7    1.90    0.61
  -1   3   7    2.87    0.54
   1   3  -7    3.59    0.51
   1   3  -7    2.94    0.58
   1   3  -7    3.04    0.62
   1  -3  -7    2.69    0.57
  -1  -3   7    2.10    0.58
  -1  -3   7    3.06    0.58
   1  -3  -7    2.67    0.50
   1  -3  -7    2.77    0.57
   1   3  -6   45.93    1.65
   1   3  -6   49.24    1.88
   1   3  -6   47.83    1.90
  -1   3   6   45.69    1.87
  -1   3   6   49.95    1.88
  -1   3   6   44.67    1.79
   1  -3  -6   48.47    1.80
   1  -3  -6   47.87    1.84
   1  -3  -6   47.28    1.84
  -1  -3   6   46.85    1.86
  -1  -3   6   48.49    1.93
   1   3  -5    0.04    0.21
  -1   3   5   -0.25    0.22
   1   3  -5    0.07    0.24
   1   3  -5   -0.07    0.30
  -1   3   5    0.23    0.23
  -1   3   5    0.16    0.33
  -1  -3   5    0.38    0.26
   1  -3  -5   -0.11    0.24
  -1  -3   5   -0.06    0.27
   1  -3  -5   -0.03    0.19
  -1   3   4    2.11    0.34
  -1   3   4    3.23    0.46
   1   3  -4    2.79    0.38
   1   3  -4    2.21    0.36
  -1   3   4    2.78    0.39
   1  -3  -4    3.01    0.40
  -1  -3   4    3.04    0.43
   1  -3  -4    3.33    0.34
  -1  -3   4    2.15    0.36
   1  -3  -4    3.08    0.36
  -1   3   3   86.95    2.69
   1   3  -3   89.39    2.76
  -1   3   3   89.46    2.74
   1   3  -3   90.71    2.76
   1  -3  -3   89.21    2.70
   1  -3  -3   88.87    2.70
   1  -3  -3   89.31    2.76
  -1  -3   3   88.70    2.77
  -1  -3   3   84.75    2.74
   1   3  -2  170.18    4.98
  -1   3   2  171.86    4.92
  -1   3   2  171.22    4.96
   1   3  -2  175.51    4.99
  -1   3   2  172.68    4.93
   1  -3  -2  168.89    4.92
  -1  -3   2  172.62    4.98
  -1  -3   2  173.57    5.00
   1  -3  -2  170.99    4.92
   1  -3  -2  172.97    4.96
   1  -3  -2  172.28    4.98
   1   3  -1  384.08   11.47
  -1   3   1  411.08   11.63
  -1   3   1  390.62   11.69
   1   3  -1  408.37   11.64
  -1  -3   1  400.59   11.72
   1  -3  -1  400.39   11.60
   1  -3  -1  419.09   11.81
   1  -3  -1  414.92   11.62
   1  -3  -1  434.00   11.79
   1  -3  -1  436.58   11.86
  -1  -3   1  402.89   11.66
   1   3   0    0.31    0.08
   1   3   0    0.34    0.07
   1   3   0    0.42    0.07
  -1   3   0    0.43    0.04
  -1   3   0    0.33    0.06
  -1   3   0    0.44    0.08
  -1  -3   0    0.41    0.09
   1  -3   0    0.36    0.06
  -1  -3   0    0.38    0.07
   1  -3   0    0.46    0.08
   1  -3   0    0.47    0.05
   1  -3   0    0.39    0.05
  -1  -3   0    0.44    0.08
  -1  -3   0    0.44    0.14
  -1   3  -1  466.42   13.04
  -1   3  -1  451.47   13.08
   1   3   1  468.34   13.17
   1   3   1  479.04   13.08
   1   3   1  391.99   13.12
  -1  -3  -1  469.73   13.05
  -1  -3  -1  446.09   13.29
   1  -3   1  450.65   13.12
  -1  -3  -1  484.20   13.13
   1  -3   1  464.35   13.01
   1   3   2   64.63    2.00
   1   3   2   63.23    2.00
   1   3   2   67.59    2.07
  -1   3  -2   68.19    2.04
  -1  -3  -2   64.83    1.98
   1  -3   2   67.94    1.91
   1  -3   2   65.25    2.04
  -1  -3  -2   67.49    2.07
   1  -3   2   65.39    2.03
  -1  -3  -2   66.09    2.02
  -1   3  -3   20.83    0.82
  -1   3  -3   19.64    0.84
   1   3   3   19.81    0.83
   1   3   3   20.36    0.81
   1   3   3   19.73    0.79
  -1  -3  -3   19.57    0.77
  -1  -3  -3   19.49    0.82
  -1  -3  -3   20.23    0.82
   1  -3   3   20.21    0.87
   1  -3   3   18.93    0.83
   1  -3   3   19.70    0.68
   1   3   4   70.48    2.33
   1   3   4   72.30    2.33
  -1   3  -4   73.11    2.38
   1   3   4   72.50    2.31
  -1   3  -4   70.44    2.33
  -1  -3  -4   72.39    2.28
   1  -3   4   67.57    2.35
  -1  -3  -4   70.64    2.34
  -1  -3  -4   69.44    2.31
   1  -3   4   70.19    2.33
  -1   3  -5   73.68    2.31
   1   3   5   80.09    2.57
   1   3   5   75.61    2.51
  -1   3  -5   76.65    2.59
   1   3   5   76.41    2.52
  -1   3  -5   76.44    2.54
  -1  -3  -5   75.85    2.48
   1  -3   5   65.08    2.67
  -1  -3  -5   75.26    2.50
  -1  -3  -5   75.36    2.59
   1  -3   5   76.16    2.59
  -1   3  -6    0.76    0.39
   1   3   6    0.99    0.38
   1   3   6    0.96    0.33
  -1   3  -6    0.94    0.32
  -1  -3  -6    2.09    0.79
  -1  -3  -6    1.35    0.40
  -1  -3  -6    1.82    0.36
   1  -3   6    0.87    0.34
   1  -3   6    1.85    0.45
  -1   3  -7    5.94    0.73
   1   3   7    6.27    0.79
  -1   3  -7    7.70    0.84
   1   3   7    6.11    0.71
  -1  -3  -7    6.20    0.69
  -1  -3  -7    5.79    0.73
  -1  -3  -7    7.35    0.80
   1  -3   7    6.45    0.77
   1  -3   7    6.02    0.82
  -1   3  -8    5.56    0.87
   1   3   8    6.28    0.94
   1   3   8    4.34    0.65
  -1   3  -8    6.84    0.95
   1  -3   8    7.05    0.94
  -1  -3  -8    6.04    0.84
  -1  -3  -8    6.69    0.86
   1  -3   8    6.27    0.89
  -1   3  -9   -0.23    0.61
   1   3   9    0.39    0.65
  -1   3  -9   -0.20    0.62
   1  -3   9    0.48    0.69
  -1  -3  -9    0.95    0.60
  -1  -3  -9   -0.06    0.59
  -1  -3  -9    0.11    0.51
   1   3  10   -1.25    0.79
   1   3  10    1.18    0.87
  -1   3 -10    0.31    0.73
  -1  -3 -10    1.02    0.82
   1  -3  10    0.96    0.87
   1   3  11    4.53    1.20
   1   3  11    5.61    1.23
  -1   3 -11    4.17    1.16
   1  -3  11    6.42    1.25
  -1  -3 -11    7.31    1.21
  -1   4  11   -0.23    0.83
   1   4 -11    0.86    0.99
  -1   4  11    2.28    1.06
  -1  -4  11    0.63    1.05
  -1  -4  11   -1.78    0.96
   1   4 -10    1.34    0.82
   1   4 -10    2.85    1.14
  -1   4  10    2.48    0.86
   1  -4 -10    2.11    0.76
  -1  -4  10    1.60    0.91
   1  -4 -10    2.08    0.78
   1  -4 -10    1.94    1.00
  -1  -4  10    1.28    0.90
  -1   4   9    2.37    0.76
   1   4  -9    0.18    0.57
   1   4  -9    1.47    0.55
   1   4  -9    1.09    1.07
  -1   4   9    1.48    0.64
   1  -4  -9    1.64    0.63
   1  -4  -9    2.06    0.63
   1  -4  -9    1.23    0.72
  -1  -4   9    0.93    0.71
  -1   4   8    8.21    0.91
   1   4  -8    5.23    0.92
   1   4  -8    7.04    0.94
  -1   4   8    6.76    0.85
   1   4  -8    7.82    0.70
  -1   4   8    7.23    1.22
  -1  -4   8    6.34    0.97
   1  -4  -8    9.02    0.96
   1  -4  -8    5.97    0.83
  -1  -4   8    6.46    0.96
   1  -4  -8    7.68    1.06
   1   4  -7    3.17    0.46
   1   4  -7    3.32    0.59
  -1   4   7    3.06    0.71
   1   4  -7    2.84    0.64
  -1   4   7    2.75    0.58
  -1   4   7    2.33    0.48
   1  -4  -7    3.01    0.56
   1  -4  -7    3.30    0.60
  -1  -4   7    2.21    0.59
  -1  -4   7    1.78    0.51
   1  -4  -7    3.12    0.54
  -1   4   6    1.00    0.45
   1   4  -6    1.22    0.39
  -1   4   6    0.75    0.32
   1   4  -6    1.35    0.30
  -1   4   6    0.92    0.38
   1   4  -6    0.76    0.39
   1  -4  -6    0.99    0.30
   1  -4  -6    0.60    0.37
   1  -4  -6    1.37    0.46
  -1  -4   6    0.79    0.39
  -1  -4   6    0.69    0.35
  -1   4   5   50.24    1.79
   1   4  -5   46.74    2.01
  -1   4   5   50.22    1.85
  -1   4   5   52.12    1.84
   1   4  -5   49.15    1.65
   1   4  -5   53.07    1.91
   1  -4  -5   49.54    1.84
   1  -4  -5   49.53    1.78
  -1  -4   5   46.80    1.87
  -1  -4   5   52.05    1.90
   1  -4  -5   52.38    1.83
  -1   4   4   86.90    2.78
  -1   4   4   88.27    2.84
  -1   4   4   92.04    2.82
   1   4  -4   87.86    2.85
   1   4  -4   89.10    2.87
  -1  -4   4   89.59    2.88
   1  -4  -4   88.88    2.80
   1  -4  -4   91.52    2.87
   1  -4  -4   87.42    2.77
  -1  -4   4   88.27    2.86
  -1   4   3    0.55    0.17
  -1   4   3    0.69    0.25
  -1   4   3    0.88    0.18
   1   4  -3    0.82    0.23
   1   4  -3    0.74    0.22
  -1  -4   3    0.52    0.21
   1  -4  -3    0.39    0.17
   1  -4  -3    0.72    0.16
   1  -4  -3    0.49    0.22
  -1  -4   3    0.64    0.24
   1   4  -2  252.24    7.05
  -1   4   2  241.43    6.96
  -1   4   2  242.43    7.01
  -1   4   2  241.62    6.96
   1   4  -2  246.82    7.05
   1  -4  -2  249.24    6.96
  -1  -4   2  256.09    7.07
   1  -4  -2  253.06    7.09
   1  -4  -2  249.21    7.03
  -1  -4   2  238.12    7.04
   1  -4  -2  244.41    6.96
   1  -4  -2  239.88    7.03
   1   4  -1    0.19    0.14
  -1   4   1    0.41    0.15
  -1  -4   1    0.49    0.14
   1  -4  -1    0.55    0.15
   1   4   0    1.55    0.17
  -1   4   0    1.54    0.08
  -1   4   0    1.44    0.17
   1   4   0    1.60    0.14
   1   4   0    1.46    0.16
   1  -4   0    1.61    0.09
   1  -4   0    1.40    0.13
   1  -4   0    1.61    0.15
  -1  -4   0    1.62    0.15
   1  -4   0    1.61    0.16
  -1  -4   0    1.58    0.16
  -1  -4   0    1.47    0.10
  -1  -4   0    1.47    0.08
   1  -4   0    1.52    0.08
  -1  -4   0    1.15    0.25
  -1   4  -1  299.83    8.26
  -1   4  -1  292.58    8.13
   1   4   1  304.98    8.30
   1   4   1  277.07    8.05
   1   4   1  249.12    8.19
  -1   4  -1  275.49    8.07
  -1  -4  -1  278.35    8.13
  -1  -4  -1  309.20    8.26
   1  -4   1  296.38    8.22
  -1   4  -2   40.68    1.33
   1   4   2   41.29    1.30
   1   4   2   39.70    1.30
   1   4   2   40.46    1.39
  -1  -4  -2   41.64    1.29
   1  -4   2   41.06    1.35
  -1  -4  -2   42.13    1.40
   1  -4   2   39.60    1.33
   1   4   3    2.54    0.28
   1   4   3    2.39    0.34
   1   4   3    2.41    0.26
  -1   4  -3    2.40    0.32
  -1   4  -3    2.55    0.29
  -1  -4  -3    2.63    0.29
   1  -4   3    2.32    0.31
  -1  -4  -3    2.45    0.36
   1  -4   3    2.37    0.17
   1  -4   3    2.48    0.30
  -1  -4  -3    2.25    0.24
  -1   4  -4   15.82    0.80
   1   4   4   17.15    0.78
   1   4   4   17.55    0.81
  -1   4  -4   17.22    0.86
   1   4   4   17.32    0.85
  -1  -4  -4   17.98    0.77
   1  -4   4   15.99    0.83
  -1  -4  -4   17.42    0.85
  -1  -4  -4   18.14    0.82
   1   4   5   23.32    1.08
   1   4   5   24.25    1.04
   1   4   5   24.07    1.07
  -1   4  -5   21.94    1.05
   1  -4   5   22.06    1.11
  -1  -4  -5   22.62    1.08
  -1  -4  -5   23.76    1.00
  -1  -4  -5   22.65    1.08
   1   4   6   12.19    0.83
   1   4   6   11.16    0.75
   1   4   6   10.41    0.78
  -1   4  -6   10.94    0.78
  -1   4  -6   10.59    0.84
  -1  -4  -6   10.85    0.81
   1  -4   6    9.78    0.76
   1  -4   6   10.51    0.83
  -1  -4  -6   11.29    0.80
   1   4   7    0.90    0.44
  -1   4  -7    1.49    0.47
  -1   4  -7    0.97    0.40
   1   4   7    1.26    0.41
   1  -4   7    1.07    0.45
  -1  -4  -7    1.12    0.38
  -1  -4  -7    1.07    0.44
   1  -4   7    0.29    0.46
  -1  -4  -7    0.43    0.43
   1   4   8    9.28    0.93
   1   4   8   10.20    1.06
  -1   4  -8   10.37    0.95
  -1   4  -8    8.94    1.04
  -1  -4  -8    9.49    0.87
   1  -4   8   10.77    1.06
  -1  -4  -8    8.99    1.16
  -1  -4  -8    8.41    0.92
   1  -4   8    7.28    0.98
   1   4   9    4.26    0.92
  -1   4  -9    7.34    1.12
   1   4   9    4.97    0.86
  -1  -4  -9    5.68    0.85
  -1  -4  -9    5.48    1.00
   1  -4   9    5.67    1.01
  -1  -4  -9    7.51    1.00
   1   4  10   -0.62    0.85
  -1   4 -10    1.25    0.82
   1   4  10    0.22    0.90
  -1  -4 -10    0.70    0.74
  -1  -4 -10    2.00    0.82
   1  -4  10    1.19    0.82
   1   4  11   -1.89    1.01
  -1   4 -11   -0.86    0.98
   1   4  11    0.48    1.12
  -1  -4 -11   -0.65    0.84
   1  -4  11    1.17    1.07
   1   5 -11    3.08    1.11
  -1   5  11    3.31    1.06
  -1   5  11    2.57    1.02
  -1  -5  11    3.17    1.16
   1  -5 -11    1.88    0.90
  -1  -5  11    2.56    1.09
  -1   5  10    1.32    0.76
   1   5 -10    2.13    0.86
  -1   5  10    0.61    0.78
   1  -5 -10    0.61    0.70
   1  -5 -10    2.48    0.79
  -1  -5  10    1.14    0.85
  -1   5   9    0.50    0.63
  -1   5   9    0.86    0.67
   1   5  -9    0.27    0.64
   1   5  -9    0.56    0.46
   1   5  -9    0.58    0.65
  -1  -5   9   -0.12    0.65
   1  -5  -9    0.35    0.67
   1  -5  -9    0.27    0.57
   1   5  -8    3.04    0.69
  -1   5   8    3.18    0.62
   1   5  -8    4.27    0.59
   1   5  -8    4.37    0.81
  -1   5   8    3.97    0.70
  -1  -5   8    4.18    0.73
  -1  -5   8    4.42    0.85
   1  -5  -8    3.40    0.58
   1  -5  -8    3.45    1.08
   1  -5  -8    5.65    0.95
   1   5  -7    0.69    0.48
  -1   5   7    0.59    0.45
   1   5  -7    0.65    0.31
  -1   5   7    0.71    0.56
  -1   5   7    0.87    0.40
   1   5  -7    0.38    0.40
  -1  -5   7    0.20    0.49
   1  -5  -7    0.54    0.51
   1  -5  -7    0.90    0.44
   1  -5  -7    0.48    0.40
  -1  -5   7    0.17    0.44
   1   5  -6    3.18    0.59
  -1   5   6    2.70    0.55
  -1   5   6    3.06    0.50
   1   5  -6    3.03    0.40
  -1   5   6    2.79    0.44
   1   5  -6    3.62    0.56
  -1  -5   6    2.88    0.53
   1  -5  -6    3.01    0.57
   1  -5  -6    2.96    0.45
   1  -5  -6    3.40    0.53
  -1  -5   6    2.91    0.58
  -1   5   5    2.65    0.41
   1   5  -5    2.89    0.31
  -1   5   5    2.54    0.40
   1   5  -5    2.78    0.43
  -1   5   5    2.76    0.49
   1   5  -5    3.06    0.50
   1  -5  -5    2.47    0.38
  -1  -5   5    2.70    0.46
  -1  -5   5    2.62    0.44
   1  -5  -5    2.60    0.40
   1   5  -4    4.90    0.50
  -1   5   4    5.48    0.41
  -1   5   4    5.42    0.52
   1   5  -4    5.05    0.48
  -1   5   4    5.40    0.45
  -1  -5   4    4.95    0.48
   1  -5  -4    5.41    0.50
  -1  -5   4    5.29    0.50
   1  -5  -4    5.24    0.41
   1  -5  -4    5.40    0.45
  -1   5   3    5.89    0.45
   1   5  -3    5.24    0.43
  -1   5   3    5.66    0.36
   1   5  -3    5.83    0.47
  -1   5   3    5.77    0.37
   1  -5  -3    5.38    0.34
   1  -5  -3    5.58    0.45
  -1  -5   3    4.94    0.45
  -1  -5   3    5.69    0.44
   1  -5  -3    5.36    0.37
  -1   5   2   55.80    1.69
   1   5  -2   56.46    1.80
  -1   5   2   57.31    1.78
  -1   5   2   55.58    1.70
  -1  -5   2   53.78    1.79
   1  -5  -2   55.34    1.78
   1  -5  -2   57.22    1.84
   1  -5  -2   56.19    1.70
   1  -5  -2   57.28    1.80
   1  -5  -2   58.12    1.69
  -1  -5   2   55.10    1.81
  -1   5   1   73.71    2.23
  -1   5   1   75.28    2.28
  -1   5   1   81.15    2.39
   1   5  -1   76.00    2.25
  -1   5   1   73.84    2.14
  -1   5   1   73.40    2.23
  -1   5   1   74.62    2.14
   1   5  -1   76.84    2.28
   1  -5  -1   75.01    2.24
  -1  -5   1   76.58    2.26
   1  -5  -1   73.79    2.13
  -1  -5   1   78.04    2.29
  -1  -5   1   76.29    2.13
   1  -5  -1   71.55    2.13
   1  -5  -1   76.61    2.27
  -1   5   0  163.28    4.46
   1   5   0  158.82    4.51
  -1   5   0  146.34    4.60
   1   5   0  162.74    4.56
  -1   5   0  160.97    4.52
  -1   5   0  159.40    4.47
   1   5   0  142.82    4.63
   1   5   0  165.53    4.56
  -1   5   0  166.22    4.54
   1  -5   0  140.73    4.57
   1  -5   0  164.55    4.52
  -1  -5   0  157.16    4.52
  -1  -5   0  157.74    4.56
   1  -5   0  164.71    4.48
   1  -5   0  165.06    4.46
   1  -5   0  164.85    4.54
  -1  -5   0  162.72    4.47
  -1  -5   0  166.58    4.46
  -1   5  -1    1.34    0.19
   1   5   1    2.06    0.30
   1   5   1    1.79    0.25
  -1   5  -1    1.30    0.16
   1   5   1    1.39    0.22
   1   5   1    1.96    0.16
  -1   5  -1    1.31    0.18
   1   5   1    2.07    0.18
  -1  -5  -1    1.97    0.17
  -1  -5  -1    1.31    0.21
   1  -5   1    1.41    0.17
  -1  -5  -1    2.04    0.32
   1  -5   1    1.32    0.19
   1   5   2    8.36    0.50
   1   5   2    7.96    0.38
  -1   5  -2    7.09    0.49
   1   5   2    8.03    0.38
  -1   5  -2    7.82    0.41
   1  -5   2    8.47    0.44
  -1  -5  -2    8.09    0.39
   1  -5   2    7.91    0.41
  -1  -5  -2    8.42    0.50
  -1  -5  -2    8.29    0.36
  -1   5  -3   -0.08    0.13
   1   5   3   -0.09    0.18
   1   5   3    0.05    0.12
   1   5   3    0.13    0.13
  -1   5  -3    0.04    0.17
  -1  -5  -3   -0.04    0.11
  -1  -5  -3    0.08    0.14
   1  -5   3    0.04    0.15
   1  -5   3    0.15    0.16
  -1  -5  -3   -0.09    0.22
   1   5   4    0.34    0.19
  -1   5  -4    0.52    0.21
   1   5   4    0.60    0.28
   1   5   4    0.73    0.24
  -1   5  -4    0.86    0.28
  -1  -5  -4    0.64    0.33
   1  -5   4    0.32    0.23
  -1  -5  -4    0.46    0.20
   1  -5   4    0.52    0.22
  -1  -5  -4    0.68    0.21
  -1   5  -5    0.17    0.24
  -1   5  -5    0.27    0.30
   1   5   5    0.67    0.31
   1   5   5    0.50    0.24
   1   5   5    0.01    0.25
  -1  -5  -5    0.05    0.22
  -1  -5  -5    0.33    0.23
   1  -5   5    0.34    0.27
  -1  -5  -5    0.23    0.38
   1   5   6   20.26    1.11
   1   5   6   21.74    1.14
  -1   5  -6   22.66    1.20
  -1   5  -6   20.15    1.09
   1   5   6   20.56    1.04
  -1  -5  -6   20.88    1.12
  -1  -5  -6   21.65    1.02
   1  -5   6   19.95    1.17
  -1  -5  -6   22.32    1.14
   1  -5   6   20.21    1.08
  -1   5  -7    3.30    0.56
   1   5   7    3.67    0.59
   1   5   7    3.88    0.61
  -1   5  -7    3.95    0.67
  -1  -5  -7    4.52    0.68
  -1  -5  -7    3.38    0.53
  -1  -5  -7    4.32    0.73
   1  -5   7    4.11    0.65
   1  -5   7    3.00    0.67
  -1   5  -8    3.91    0.71
   1   5   8    5.45    0.82
   1   5   8    6.63    1.32
  -1   5  -8    5.76    0.86
  -1  -5  -8    4.93    0.83
  -1  -5  -8    7.61    1.26
   1  -5   8    4.21    0.70
   1  -5   8    6.78    1.00
  -1  -5  -8    4.02    0.66
   1   5   9   -0.95    0.67
   1   5   9   -0.86    0.61
  -1   5  -9    0.29    0.63
  -1  -5  -9   -0.14    0.59
  -1  -5  -9    0.20    0.59
   1  -5   9   -0.54    0.66
  -1  -5  -9   -0.40    0.66
   1   5  10    1.32    0.90
   1   5  10    0.87    0.86
  -1   5 -10    0.40    0.83
   1  -5  10    0.15    0.89
  -1  -5 -10    1.21    0.78
  -1   5 -11    0.53    0.97
   1   5  11    1.08    1.00
   1   5  11    2.69    1.08
  -1  -5 -11   -0.55    0.89
   1  -5  11    0.20    1.05
   1   6 -11   -1.42    0.98
  -1   6  11    0.99    0.95
  -1   6  11    0.49    0.96
   1  -6 -11    0.02    0.82
  -1  -6  11    1.02    1.11
  -1   6  10    5.76    1.03
   1   6 -10    7.10    1.16
  -1   6  10    9.08    1.32
  -1  -6  10    4.57    1.02
   1  -6 -10    6.16    1.01
   1  -6 -10    6.59    0.99
   1   6  -9   -0.90    0.62
   1   6  -9    0.78    0.42
  -1   6   9    0.19    0.61
  -1   6   9    0.03    0.60
   1  -6  -9   -1.03    0.52
   1  -6  -9   -0.36    0.70
   1  -6  -9   -0.78    0.50
  -1  -6   9    0.41    0.71
   1   6  -8   -0.06    0.33
   1   6  -8    0.13    0.51
  -1   6   8   -0.36    0.47
  -1   6   8   -0.19    0.62
  -1   6   8   -0.56    0.43
   1   6  -8    0.46    0.52
   1  -6  -8    1.23    0.64
  -1  -6   8    0.59    0.59
   1  -6  -8    0.36    0.40
  -1  -6   8   -0.28    0.56
   1   6  -7    0.44    0.45
  -1   6   7    0.91    0.47
   1   6  -7   -0.15    0.28
   1   6  -7    0.44    0.48
  -1   6   7    0.35    0.35
  -1   6   7   -0.01    0.47
   1  -6  -7    0.12    0.49
   1  -6  -7   -0.13    0.29
   1  -6  -7   -0.16    0.38
  -1  -6   7    0.16    0.46
  -1  -6   7    1.25    0.51
  -1   6   6    7.47    0.80
  -1   6   6    7.18    0.69
   1   6  -6    8.01    0.73
  -1   6   6    6.84    0.63
   1   6  -6    7.64    0.49
   1   6  -6    7.81    0.82
   1  -6  -6    8.25    0.76
   1  -6  -6    7.34    0.70
  -1  -6   6    7.61    0.80
   1  -6  -6    7.65    0.60
  -1  -6   6    7.65    0.73
   1   6  -5    0.35    0.32
  -1   6   5    0.14    0.26
  -1   6   5    0.12    0.22
   1   6  -5    0.23    0.19
  -1   6   5    0.16    0.33
   1   6  -5    0.08    0.27
   1  -6  -5    0.12    0.22
   1  -6  -5   -0.16    0.23
  -1  -6   5   -0.01    0.30
   1  -6  -5   -0.18    0.34
  -1  -6   5    0.11    0.31
   1   6  -4   17.17    0.90
   1   6  -4   17.86    0.88
  -1   6   4   18.34    0.79
  -1   6   4   18.40    0.82
  -1   6   4   17.38    0.88
   1  -6  -4   18.69    0.78
  -1  -6   4   17.32    0.90
   1  -6  -4   18.34    0.81
   1  -6  -4   17.31    0.89
  -1  -6   4   17.50    0.87
  -1   6   3    0.11    0.14
   1   6  -3    0.31    0.19
  -1   6   3    0.09    0.21
   1   6  -3    0.43    0.23
  -1   6   3    0.15    0.13
   1  -6  -3    0.06    0.21
   1  -6  -3    0.19    0.15
   1  -6  -3    0.19    0.12
   1  -6  -3    0.22    0.20
  -1  -6   3    0.24    0.19
  -1  -6   3    0.28    0.23
  -1   6   2   16.66    0.60
  -1   6   2   17.96    1.02
  -1   6   2   17.63    0.71
   1   6  -2   17.72    0.75
   1  -6  -2   17.04    0.74
  -1  -6   2   17.33    0.76
   1  -6  -2   17.28    0.77
  -1  -6   2   17.88    0.74
   1  -6  -2   17.41    0.62
   1  -6  -2   17.51    0.60
   1  -6  -2   16.90    0.72
  -1   6   1   37.11    1.28
   1   6  -1   40.08    1.15
  -1   6   1   37.71    1.11
   1   6  -1   40.20    1.26
  -1   6   1   38.21    1.22
  -1   6   1   43.22    1.41
  -1   6   1   37.34    1.23
  -1   6   1   36.39    1.10
   1   6  -1   37.86    1.27
   1   6  -1   37.43    1.23
   1  -6  -1   39.08    1.21
   1  -6  -1   38.34    1.31
  -1  -6   1   37.91    1.27
   1  -6  -1   37.64    1.23
   1  -6  -1   39.56    1.28
  -1  -6   1   38.54    1.26
  -1  -6   1   38.74    1.13
  -1   6   0  445.36   12.14
  -1   6   0  465.07   12.62
   1   6   0  393.92   12.24
   1   6   0  396.58   12.11
  -1   6   0  440.92   12.14
   1   6   0  433.58   12.23
  -1   6   0  434.31   12.46
   1   6   0  445.55   12.55
   1   6   0  421.05   12.25
  -1   6   0  417.35   12.31
  -1  -6   0  420.84   12.19
  -1  -6   0  482.63   13.19
   1  -6   0  425.61   12.19
   1  -6   0  423.21   12.08
   1  -6   0  433.32   12.51
  -1  -6   0  412.94   12.25
   1  -6   0  439.65   12.34
  -1  -6   0  425.78   12.13
  -1  -6   0  437.49   12.18
  -1  -6   0  425.93   12.25
   1  -6   0  454.53   12.45
   1  -6   0  441.64   12.14
  -1   6  -1  975.01   27.36
   1   6   1  998.28   27.63
   1   6   1  993.18   27.97
   1   6   1  961.92   27.27
   1   6   1  950.58   27.25
  -1   6  -1  933.96   27.29
   1   6   1  965.05   27.34
  -1   6  -1  958.90   27.27
  -1  -6  -1  980.20   27.34
  -1  -6  -1  991.96   27.28
  -1  -6  -1 1000.00   27.82
   1  -6   1  981.13   27.29
   1  -6   1  923.46   27.27
  -1  -6  -1  949.21   27.60
   1  -6   1  911.02   27.41
  -1   6  -2   16.84    0.70
  -1   6  -2   17.12    0.68
   1   6   2   16.08    0.76
   1   6   2   17.05    0.70
   1   6   2   17.27    0.64
   1   6   2   16.61    0.63
  -1  -6  -2   16.99    0.76
  -1  -6  -2   17.42    0.66
  -1  -6  -2   17.31    0.61
   1  -6   2   17.56    0.71
   1  -6   2   16.83    0.68
   1   6   3   34.42    1.20
  -1   6  -3   33.06    1.23
  -1   6  -3   36.99    1.29
   1   6   3   33.96    1.19
   1   6   3   33.03    1.31
  -1  -6  -3   35.11    1.22
  -1  -6  -3   34.23    1.31
   1  -6   3   32.93    1.26
   1  -6   3   33.39    1.24
  -1  -6  -3   35.50    1.16
   1   6   4    0.09    0.18
   1   6   4    0.31    0.18
  -1   6  -4   -0.02    0.19
   1   6   4   -0.11    0.23
  -1   6  -4   -0.21    0.22
  -1  -6  -4    0.13    0.15
  -1  -6  -4    0.03    0.27
  -1  -6  -4   -0.27    0.18
   1  -6   4    0.07    0.22
   1  -6   4   -0.10    0.20
  -1   6  -5   -0.32    0.24
  -1   6  -5   -0.03    0.25
   1   6   5   -0.38    0.21
   1   6   5    0.24    0.22
   1   6   5   -0.03    0.31
  -1  -6  -5    0.05    0.18
   1  -6   5    0.15    0.25
   1  -6   5    0.13    0.28
  -1  -6  -5   -0.13    0.38
  -1  -6  -5    0.05    0.24
   1   6   6   -0.05    0.30
  -1   6  -6    0.09    0.32
   1   6   6    0.13    0.25
  -1   6  -6   -0.07    0.29
   1   6   6   -0.17    0.36
  -1  -6  -6   -0.09    0.30
   1  -6   6    0.21    0.32
  -1  -6  -6   -0.19    0.38
   1  -6   6    0.10    0.41
  -1  -6  -6    0.13    0.27
   1   6   7    0.35    0.41
  -1   6  -7    0.68    0.42
   1   6   7    0.06    0.58
  -1   6  -7   -0.11    0.45
   1   6   7   -0.31    0.34
  -1  -6  -7    1.00    0.51
   1  -6   7    0.02    0.58
  -1  -6  -7    0.42    0.35
   1  -6   7   -0.50    0.46
  -1  -6  -7    0.70    0.35
  -1   6  -8    0.96    0.52
   1   6   8    0.14    0.63
  -1   6  -8   -0.01    0.57
   1   6   8    0.99    0.56
  -1  -6  -8    0.73    0.62
  -1  -6  -8    0.98    0.48
   1  -6   8    0.55    0.55
  -1  -6  -8   -0.04    0.46
   1  -6   8    0.25    0.84
  -1   6  -9    1.24    0.74
   1   6   9    2.00    0.85
   1   6   9    1.14    0.70
  -1  -6  -9    0.98    0.57
  -1  -6  -9    1.55    0.60
   1  -6   9    1.85    0.79
  -1  -6  -9    0.86    0.75
  -1   6 -10    6.24    1.09
   1   6  10    8.02    1.32
   1   6  10    7.47    1.19
  -1  -6 -10    7.03    1.04
   1  -6  10    8.86    1.41
  -1  -6 -10    6.52    1.03
   1   6  11    4.94    1.31
  -1   6 -11    1.58    1.02
   1   6  11    2.90    1.13
   1  -6  11    1.38    1.09
  -1  -6 -11    2.00    0.86
  -1   7  11    3.88    1.14
   1   7 -11    5.19    1.23
  -1  -7  11    3.51    1.21
   1  -7 -11    3.20    0.99
  -1  -7  11    3.94    1.25
  -1   7  10    5.62    1.01
  -1   7  10    6.59    1.11
   1   7 -10    7.51    1.23
   1  -7 -10    7.31    0.95
   1  -7 -10    8.57    1.22
  -1  -7  10    5.79    1.12
   1   7  -9    8.83    1.25
   1   7  -9    9.31    0.72
  -1   7   9    8.81    1.21
  -1   7   9    9.29    1.16
   1  -7  -9    7.48    1.02
   1  -7  -9    9.06    1.24
  -1  -7   9    7.52    1.25
   1  -7  -9   11.51    1.11
  -1   7   8    1.10    0.58
  -1   7   8   -0.12    0.50
   1   7  -8   -0.12    0.55
   1   7  -8    0.13    0.31
   1   7  -8    0.74    0.57
  -1   7   8   -0.19    0.46
   1  -7  -8    0.49    0.61
   1  -7  -8    0.81    0.56
   1  -7  -8    0.75    0.44
  -1  -7   8   -0.06    0.53
  -1  -7   8    0.29    0.55
   1   7  -7    2.39    0.60
  -1   7   7    2.35    0.59
  -1   7   7    2.58    0.57
   1   7  -7    2.26    0.40
  -1   7   7    1.69    0.45
   1   7  -7    2.55    0.54
   1  -7  -7    3.04    0.68
   1  -7  -7    2.44    0.53
  -1  -7   7    3.15    0.70
  -1  -7   7    2.57    0.60
   1  -7  -7    2.48    0.50
   1   7  -6   10.80    0.90
  -1   7   6   11.24    0.74
   1   7  -6   10.94    0.85
  -1   7   6   10.88    0.88
   1   7  -6   10.74    0.57
  -1   7   6   10.36    0.81
  -1  -7   6   11.24    0.97
  -1  -7   6   10.68    0.84
   1  -7  -6   10.68    0.79
   1  -7  -6   11.34    0.92
   1  -7  -6   10.98    0.70
  -1   7   5    1.40    0.27
   1   7  -5    1.73    0.37
  -1   7   5    1.59    0.34
  -1   7   5    2.66    0.49
   1   7  -5    2.33    0.27
   1   7  -5    1.84    0.42
   1  -7  -5    2.51    0.54
  -1  -7   5    1.76    0.45
   1  -7  -5    1.92    0.33
   1  -7  -5    2.01    0.39
  -1  -7   5    1.65    0.47
   1   7  -4   65.30    2.36
  -1   7   4   65.23    2.14
  -1   7   4   66.28    2.24
   1   7  -4   71.51    2.33
   1  -7  -4   67.72    2.33
   1  -7  -4   68.52    2.18
   1  -7  -4   66.16    2.13
  -1  -7   4   68.17    2.31
  -1  -7   4   65.86    2.28
  -1   7   3   71.98    2.18
   1   7  -3   70.03    2.29
  -1   7   3   70.31    2.25
   1   7  -3   73.66    2.31
  -1   7   3   69.02    2.15
  -1  -7   3   68.84    2.31
   1  -7  -3   70.96    2.17
  -1  -7   3   67.44    2.28
   1  -7  -3   70.20    2.31
   1  -7  -3   69.32    2.14
   1  -7  -3   72.83    2.30
   1  -7  -3   70.75    2.35
   1   7  -2   39.49    1.15
   1   7  -2   38.00    1.36
  -1   7   2   40.03    1.33
   1   7  -2   40.48    1.36
  -1   7   2   39.22    1.22
   1  -7  -2   39.60    1.20
  -1  -7   2   40.59    1.39
   1  -7  -2   40.66    1.38
   1  -7  -2   39.54    1.42
  -1  -7   2   37.99    1.35
   1  -7  -2   41.33    1.32
   1  -7  -2   39.61    1.22
   1  -7  -2   39.58    1.35
   1   7  -1  118.29    3.41
  -1   7   1  113.99    3.43
   1   7  -1  113.09    3.38
   1   7  -1  116.68    3.41
   1  -7  -1  116.57    3.36
  -1  -7   1  115.18    3.42
  -1  -7   1  117.68    3.28
  -1  -7   1  116.28    3.40
   1  -7  -1  114.52    3.83
   1  -7  -1  111.99    3.37
   1  -7  -1  116.23    3.47
   1  -7  -1  117.38    3.42
   1   7   0  142.78    4.17
   1   7   0  139.09    4.11
  -1   7   0  137.92    4.08
   1   7   0  140.35    4.13
   1   7   0  136.31    4.06
  -1   7   0  144.25    4.00
  -1   7   0  147.85    4.11
  -1   7   0  143.43    4.00
  -1   7   0  140.26    4.12
  -1  -7   0  141.95    4.10
  -1  -7   0  136.58    4.07
   1  -7   0  143.33    4.00
  -1  -7   0  145.87    4.43
   1  -7   0  149.10    4.09
   1  -7   0  148.93    4.12
   1  -7   0  147.66    4.15
  -1  -7   0  139.99    4.14
  -1  -7   0  139.06    4.01
   1  -7   0  142.40    4.11
  -1  -7   0  140.42    4.03
   1  -7   0  144.66    3.99
   1   7   1    7.11    0.30
   1   7   1    5.75    0.43
  -1   7  -1    6.46    0.34
  -1   7  -1    6.08    0.34
   1   7   1    7.37    0.39
  -1   7  -1    5.76    0.32
  -1   7  -1    6.08    0.34
   1   7   1    6.84    0.33
   1   7   1    6.66    0.33
   1   7   1    7.36    0.65
  -1   7  -1    5.62    0.31
  -1  -7  -1    7.39    0.32
  -1  -7  -1    6.51    0.38
   1  -7   1    6.02    0.35
   1  -7   1    6.17    0.31
  -1  -7  -1    6.95    0.30
   1  -7   1    6.11    0.31
   1  -7   1    6.12    0.34
  -1  -7  -1    6.90    0.46
  -1   7  -2   18.63    0.70
   1   7   2   18.11    0.68
  -1   7  -2   18.46    0.75
   1   7   2   20.66    1.24
   1   7   2   19.02    0.84
   1   7   2   19.33    0.75
   1   7   2   17.67    0.68
  -1   7  -2   18.65    0.74
   1  -7   2   18.58    0.74
  -1  -7  -2   18.62    0.66
   1  -7   2   18.71    0.75
  -1  -7  -2   19.18    0.84
  -1  -7  -2   18.67    0.70
  -1  -7  -2   17.57    0.74
  -1   7  -3    0.60    0.19
   1   7   3    0.45    0.15
   1   7   3    0.31    0.25
  -1   7  -3    0.70    0.24
   1   7   3    0.72    0.21
   1   7   3    0.66    0.26
  -1  -7  -3    0.59    0.20
   1  -7   3    0.72    0.21
   1  -7   3    0.67    0.21
  -1  -7  -3    0.55    0.15
  -1  -7  -3    0.48    0.28
  -1   7  -4    0.35    0.27
   1   7   4    0.82    0.36
   1   7   4    0.67    0.22
   1   7   4    0.82    0.41
   1   7   4    1.09    0.36
  -1   7  -4    0.97    0.29
  -1  -7  -4    0.92    0.24
   1  -7   4    0.62    0.25
   1  -7   4    0.67    0.27
  -1  -7  -4    1.07    0.37
  -1  -7  -4    0.69    0.20
   1   7   5   41.88    1.62
   1   7   5   43.83    1.73
   1   7   5   41.08    1.57
  -1   7  -5   45.25    1.72
  -1   7  -5   43.21    1.65
   1   7   5   41.12    1.68
  -1  -7  -5   43.55    1.64
   1  -7   5   41.19    1.66
  -1  -7  -5   41.43    1.70
   1  -7   5   42.19    1.69
  -1  -7  -5   43.93    1.53
   1   7   6    5.03    0.71
   1   7   6    5.42    0.58
  -1   7  -6    5.66    0.73
   1   7   6    6.33    0.67
   1   7   6    5.10    0.78
  -1   7  -6    4.70    0.60
  -1  -7  -6    5.11    0.53
   1  -7   6    4.56    0.64
  -1  -7  -6    4.15    0.69
  -1  -7  -6    5.31    0.61
   1  -7   6    6.23    0.73
   1   7   7   25.78    1.47
  -1   7  -7   25.11    1.42
  -1   7  -7   22.17    1.29
   1   7   7   25.17    1.33
   1   7   7   24.46    1.23
  -1  -7  -7   26.52    1.34
   1  -7   7   23.30    1.32
  -1  -7  -7   22.07    1.16
  -1  -7  -7   24.40    1.37
   1  -7   7   27.26    1.47
  -1   7  -8    1.38    0.57
   1   7   8    1.71    0.71
   1   7   8    1.39    0.61
   1   7   8    1.96    0.52
  -1   7  -8    2.26    0.69
  -1  -7  -8    1.62    0.49
   1  -7   8    1.02    0.59
   1  -7   8    0.85    0.60
  -1  -7  -8    1.55    0.67
  -1  -7  -8    1.04    0.49
  -1   7  -9    0.54    0.65
   1   7   9    1.27    0.65
   1   7   9    0.09    0.66
  -1  -7  -9    0.78    0.57
   1  -7   9    0.49    0.76
  -1  -7  -9    1.03    0.57
  -1  -7  -9    0.19    0.77
  -1   7 -10   -0.43    0.82
   1   7  10    0.76    0.89
   1   7  10   -0.53    0.90
  -1  -7 -10   -0.22    0.73
   1  -7  10    3.06    0.97
  -1  -7 -10    0.25    0.68
  -1   7 -11    1.67    1.05
   1   7  11    5.97    1.29
   1   7  11    4.20    1.21
   1  -7  11    3.01    1.13
  -1  -7 -11    2.97    1.06
   1   8 -11    9.29    1.49
  -1   8  11    6.59    1.22
  -1   8  11   11.33    1.75
  -1  -8  11   10.67    1.74
   1  -8 -11   10.18    1.56
  -1   8  10    0.91    0.84
   1   8 -10    1.66    0.95
  -1   8  10    1.31    0.84
  -1  -8  10    1.80    0.93
   1  -8 -10    0.10    0.73
   1  -8 -10    0.91    0.73
  -1   8   9    1.80    0.73
   1   8  -9    0.97    0.41
  -1   8   9    2.05    0.69
   1   8  -9    1.89    0.81
   1  -8  -9    0.49    0.61
   1  -8  -9    0.60    0.56
  -1  -8   9    1.08    0.72
  -1   8   8   -0.44    0.47
  -1   8   8    0.88    0.53
   1   8  -8   -0.03    0.55
   1   8  -8    0.03    0.51
   1   8  -8    0.13    0.28
   1  -8  -8    1.54    0.65
   1  -8  -8    0.31    0.47
  -1  -8   8   -0.04    0.58
   1  -8  -8    0.91    0.43
   1   8  -7    2.20    0.37
   1   8  -7    2.99    0.66
  -1   8   7    2.10    0.55
   1   8  -7    2.80    0.56
  -1   8   7    2.17    0.46
  -1   8   7    3.36    0.64
   1  -8  -7    2.27    0.44
  -1  -8   7    2.46    0.61
   1  -8  -7    2.77    0.55
   1  -8  -7    2.48    0.65
  -1  -8   7    1.77    0.56
  -1   8   6   14.15    1.00
  -1   8   6   13.89    0.90
  -1   8   6   14.00    0.83
   1   8  -6   13.30    0.96
   1   8  -6   13.31    0.60
   1   8  -6   13.94    1.01
   1  -8  -6   14.32    0.79
  -1  -8   6   13.00    0.99
  -1  -8   6   12.50    0.92
   1  -8  -6   15.00    1.01
   1  -8  -6   13.87    0.89
  -1   8   5   14.77    0.89
   1   8  -5   15.29    0.93
   1   8  -5   14.90    0.88
  -1   8   5   14.45    0.80
  -1   8   5   15.37    0.77
   1  -8  -5   15.27    0.80
  -1  -8   5   13.28    1.01
  -1  -8   5   14.59    0.93
   1  -8  -5   14.86    0.94
   1  -8  -5   14.05    0.71
   1   8  -4    0.18    0.28
  -1   8   4    0.51    0.20
  -1   8   4    0.58    0.30
  -1   8   4    0.35    0.17
   1   8  -4    0.12    0.24
  -1  -8   4    0.38    0.28
   1  -8  -4    0.38    0.21
   1  -8  -4    0.30    0.14
  -1  -8   4   -0.11    0.25
  -1   8   3   51.62    2.11
  -1   8   3   45.47    1.46
  -1   8   3   46.50    1.58
   1   8  -3   43.92    1.60
  -1   8   3   45.85    1.48
   1  -8  -3   46.17    1.61
   1  -8  -3   44.06    1.47
   1  -8  -3   45.35    1.68
  -1  -8   3   42.86    1.59
  -1  -8   3   43.79    1.63
   1  -8  -3   44.61    1.43
   1  -8  -3   47.03    1.63
   1   8  -2    6.44    0.42
  -1   8   2    6.32    0.42
  -1   8   2    7.68    0.66
   1   8  -2    6.25    0.44
   1   8  -2    6.29    0.26
  -1   8   2    5.94    0.28
  -1  -8   2    5.86    0.42
   1  -8  -2    6.51    0.39
   1  -8  -2    6.12    0.26
   1  -8  -2    6.01    0.42
  -1  -8   2    6.18    0.47
   1  -8  -2    6.95    0.46
   1  -8  -2    6.66    0.49
   1  -8  -2    6.10    0.29
  -1   8   1   76.73    2.41
  -1   8   1   74.85    2.34
   1   8  -1   78.59    2.38
   1   8  -1   80.23    2.39
   1   8  -1   73.38    2.43
   1   8  -1   77.92    2.26
   1   8  -1   77.82    2.35
   1  -8  -1   78.47    2.33
  -1  -8   1   78.01    2.39
   1  -8  -1   77.10    2.35
   1  -8  -1   79.40    2.65
   1  -8  -1   79.53    2.46
  -1  -8   1   79.41    2.37
   1  -8  -1   76.46    2.37
  -1  -8   1   79.36    2.26
   1  -8  -1   79.78    2.40
  -1   8   0    0.37    0.14
  -1   8   0    0.22    0.11
   1   8   0    0.12    0.13
   1   8   0    0.29    0.15
   1   8   0    0.12    0.10
  -1   8   0    0.16    0.15
   1   8   0   -0.15    0.18
   1   8   0    0.23    0.11
  -1   8   0    0.10    0.07
  -1  -8   0    0.32    0.16
  -1  -8   0    0.06    0.11
   1  -8   0    0.28    0.08
   1  -8   0    0.19    0.06
  -1  -8   0    0.31    0.24
   1  -8   0    0.03    0.15
   1  -8   0    0.08    0.13
   1  -8   0    0.24    0.15
  -1  -8   0    0.02    0.08
  -1  -8   0    0.13    0.09
   1  -8   0    0.23    0.13
  -1  -8   0    0.25    0.13
  -1   8  -1    6.12    0.31
  -1   8  -1    6.12    0.34
  -1   8  -1    5.84    0.34
  -1   8  -1    6.22    0.34
   1   8   1    6.68    0.39
   1   8   1    5.85    0.32
  -1   8  -1    6.41    0.36
   1   8   1    6.47    0.34
   1   8   1    6.22    0.29
   1   8   1    5.55    0.44
   1  -8   1    6.19    0.32
  -1  -8  -1    6.19    0.31
  -1  -8  -1    6.47    0.46
   1  -8   1    6.02    0.36
  -1  -8  -1    6.44    0.34
  -1  -8  -1    6.22    0.35
   1  -8   1    6.19    0.35
  -1  -8  -1    6.08    0.29
   1  -8   1    6.14    0.33
  -1  -8  -1    6.44    0.39
  -1   8  -2   57.59    1.79
   1   8   2   58.43    1.77
   1   8   2   57.38    1.78
  -1   8  -2   57.63    1.85
   1   8   2   57.50    1.96
   1   8   2   57.20    1.82
   1   8   2   59.13    2.37
  -1   8  -2   58.31    1.84
   1  -8   2   58.13    1.85
  -1  -8  -2   59.24    1.75
   1  -8   2   57.43    1.68
  -1  -8  -2   58.58    1.96
  -1  -8  -2   56.58    1.85
  -1  -8  -2   57.17    1.79
   1  -8   2   56.24    1.83
   1   8   3   43.37    1.61
  -1   8  -3   45.25    1.54
   1   8   3   41.65    1.41
   1   8   3   43.17    1.50
  -1   8  -3   41.91    1.49
  -1  -8  -3   42.68    1.45
   1  -8   3   41.67    1.52
  -1  -8  -3   43.17    1.39
  -1  -8  -3   44.68    1.62
   1  -8   3   40.48    1.49
   1   8   4   19.21    0.86
  -1   8  -4   18.68    0.89
  -1   8  -4   21.22    0.97
   1   8   4   19.70    1.02
   1   8   4   17.67    0.83
   1   8   4   20.11    0.95
  -1  -8  -4   19.14    0.87
  -1  -8  -4   17.30    1.11
  -1  -8  -4   18.45    0.78
   1  -8   4   19.65    0.95
   1  -8   4   19.83    0.92
   1   8   5    5.27    0.66
   1   8   5    5.16    0.61
  -1   8  -5    3.92    0.66
   1   8   5    4.15    0.48
  -1   8  -5    5.23    0.64
   1   8   5    4.59    0.49
  -1  -8  -5    4.57    0.52
   1  -8   5    4.63    0.55
   1  -8   5    4.25    0.61
  -1  -8  -5    4.88    0.43
  -1  -8  -5    4.55    0.65
   1   8   6    3.28    0.55
  -1   8  -6    2.56    0.57
   1   8   6    4.26    0.68
   1   8   6    3.41    0.58
  -1   8  -6    3.01    0.50
   1   8   6    3.80    0.65
   1  -8   6    3.74    0.61
  -1  -8  -6    3.72    0.69
  -1  -8  -6    3.47    0.58
   1  -8   6    4.75    0.71
  -1  -8  -6    4.11    0.50
   1   8   7    2.44    0.50
  -1   8  -7    2.30    0.58
   1   8   7    2.53    0.52
   1   8   7    2.95    0.65
  -1   8  -7    3.07    0.58
   1  -8   7    3.04    0.52
  -1  -8  -7    2.22    0.45
  -1  -8  -7    3.15    0.67
   1  -8   7    2.20    0.61
  -1  -8  -7    2.24    0.51
   1   8   8    0.05    0.49
   1   8   8    1.00    0.61
   1   8   8    1.04    0.60
  -1   8  -8    1.58    0.56
  -1   8  -8    0.15    0.67
  -1  -8  -8    1.13    0.67
  -1  -8  -8    1.24    0.54
  -1  -8  -8    0.79    0.47
   1  -8   8   -0.07    0.52
   1  -8   8    0.29    0.57
   1   8   9    4.26    0.80
  -1   8  -9    3.04    0.80
   1   8   9    2.51    0.79
  -1  -8  -9    1.50    0.62
  -1  -8  -9    2.02    0.99
   1  -8   9    1.82    0.78
  -1  -8  -9    2.68    0.66
  -1   8 -10    2.17    0.88
   1   8  10    2.19    0.92
  -1  -8 -10   -0.48    0.70
   1  -8  10   -1.10    0.86
  -1  -8 -10   -0.16    0.67
   1   8  11    1.30    1.16
   1   8  11   -0.45    1.06
  -1   8 -11    1.78    1.19
   1  -8  11    0.94    1.10
  -1  -8 -11    1.98    0.99
  -1   9  11    0.54    0.93
   1   9 -11    1.30    1.17
  -1   9  11    2.61    1.11
   1  -9 -11    1.60    0.89
  -1  -9  11   -0.11    1.10
  -1   9  10    7.43    1.11
  -1   9  10    4.06    0.98
   1   9 -10    5.41    1.12
   1  -9 -10    4.01    0.94
   1  -9 -10    6.39    1.02
   1   9  -9    4.85    0.96
  -1   9   9    4.32    0.82
  -1   9   9    4.53    0.84
   1  -9  -9    4.46    0.74
   1  -9  -9    4.93    1.19
  -1  -9   9    4.76    0.93
   1  -9  -9    2.88    0.75
  -1   9   8    1.32    0.57
   1   9  -8    0.82    0.60
   1   9  -8    1.24    0.30
  -1   9   8    1.21    0.61
  -1   9   8    1.97    0.61
   1  -9  -8    1.24    0.75
   1  -9  -8    1.14    0.46
   1  -9  -8    0.68    0.44
  -1  -9   8    2.34    0.68
  -1  -9   8    0.08    0.66
  -1   9   7   28.10    1.30
   1   9  -7   31.90    1.60
  -1   9   7   27.25    1.46
   1   9  -7   27.14    0.97
  -1   9   7   28.81    1.40
   1   9  -7   26.70    1.47
   1  -9  -7   26.87    1.25
   1  -9  -7   28.50    1.54
   1  -9  -7   30.22    1.41
  -1  -9   7   24.99    1.45
  -1  -9   7   27.89    1.55
   1   9  -6    0.61    0.44
  -1   9   6    0.75    0.27
  -1   9   6    1.22    0.51
   1   9  -6    0.75    0.21
  -1   9   6    0.52    0.37
   1   9  -6    1.13    0.45
   1  -9  -6    0.53    0.35
   1  -9  -6    0.75    0.27
   1  -9  -6    0.44    0.53
  -1  -9   6    1.62    0.43
  -1  -9   6    0.59    0.41
   1   9  -5   -0.14    0.34
  -1   9   5   -0.20    0.24
   1   9  -5    0.07    0.28
  -1   9   5    0.15    0.19
  -1   9   5   -0.16    0.34
  -1  -9   5    0.14    0.35
   1  -9  -5    0.16    0.20
   1  -9  -5    0.06    0.24
   1  -9  -5    0.43    0.38
  -1   9   4   43.55    1.61
   1   9  -4   43.73    1.64
  -1   9   4   42.27    1.50
  -1   9   4   42.99    1.47
   1   9  -4   44.82    1.67
   1  -9  -4   43.57    1.49
  -1  -9   4   43.22    1.64
  -1  -9   4   42.75    1.67
   1  -9  -4   42.98    1.72
   1  -9  -4   42.50    1.44
  -1   9   3    7.80    0.94
   1   9  -3    7.56    0.55
  -1   9   3    8.05    0.43
   1   9  -3    7.66    0.31
  -1   9   3    8.56    0.40
   1   9  -3    7.56    0.57
  -1   9   3    8.17    0.54
   1  -9  -3    8.88    0.60
   1  -9  -3    7.52    0.58
   1  -9  -3    8.55    0.61
  -1  -9   3    7.72    0.56
   1  -9  -3    8.68    0.39
  -1  -9   3    7.10    0.56
   1  -9  -3    7.94    0.43
  -1   9   2   23.59    0.76
   1   9  -2   24.01    0.75
  -1   9   2   21.89    0.82
   1   9  -2   25.12    0.94
   1   9  -2   23.77    0.95
  -1   9   2   23.96    0.90
   1   9  -2   24.11    0.92
  -1   9   2   25.13    1.20
   1  -9  -2   23.96    0.93
   1  -9  -2   24.34    0.74
  -1  -9   2   22.76    0.96
   1  -9  -2   23.44    0.97
   1  -9  -2   23.58    1.02
   1  -9  -2   23.11    0.76
  -1  -9   2   22.95    0.93
   1  -9  -2   24.50    0.89
   1   9  -1    4.45    0.32
   1   9  -1    4.40    0.36
  -1   9   1    4.87    0.40
   1   9  -1    4.99    0.37
   1   9  -1    4.92    0.27
   1   9  -1    4.56    0.34
   1  -9  -1    4.76    0.41
  -1  -9   1    4.74    0.35
   1  -9  -1    5.34    0.32
   1  -9  -1    4.89    0.38
  -1  -9   1    4.77    0.27
  -1  -9   1    5.13    0.40
   1  -9  -1    4.85    0.35
   1  -9  -1    4.62    0.34
   1   9   0    0.17    0.18
   1   9   0    0.14    0.10
  -1   9   0    0.17    0.13
  -1   9   0    0.02    0.07
  -1   9   0    0.08    0.11
  -1   9   0   -0.13    0.14
   1   9   0   -0.04    0.14
  -1   9   0    0.05    0.08
   1   9   0    0.10    0.15
  -1  -9   0    0.19    0.13
  -1  -9   0    0.03    0.09
  -1  -9   0    0.09    0.24
   1  -9   0    0.08    0.11
  -1  -9   0    0.22    0.15
   1  -9   0    0.09    0.15
  -1  -9   0    0.31    0.11
   1  -9   0   -0.15    0.16
   1  -9   0    0.22    0.14
  -1  -9   0    0.07    0.11
   1  -9   0    0.09    0.06
  -1  -9   0    0.28    0.16
  -1   9  -1    9.27    0.41
  -1   9  -1    8.88    0.45
   1   9   1    9.08    0.37
  -1   9  -1    9.04    0.45
   1   9   1    9.37    0.49
  -1   9  -1    8.55    0.43
   1   9   1    9.57    0.43
  -1   9  -1    8.57    0.42
   1   9   1    8.34    0.70
   1   9   1    8.24    0.54
  -1  -9  -1    8.74    0.42
  -1  -9  -1    9.01    0.39
   1  -9   1    9.07    0.40
   1  -9   1    8.97    0.43
  -1  -9  -1    9.13    0.42
   1  -9   1    9.00    0.43
   1  -9   1    9.21    0.46
  -1  -9  -1    9.36    0.40
  -1  -9  -1    8.91    0.55
  -1  -9  -1    9.17    0.50
  -1   9  -2   14.72    0.62
   1   9   2   14.47    0.77
   1   9   2   13.67    0.56
   1   9   2   14.87    0.63
   1   9   2   14.04    0.58
   1   9   2   13.28    1.03
  -1   9  -2   14.85    0.64
  -1   9  -2   14.94    0.66
   1  -9   2   14.36    0.51
   1  -9   2   13.80    0.62
  -1  -9  -2   14.29    0.66
  -1  -9  -2   15.05    0.77
  -1  -9  -2   14.56    0.59
  -1  -9  -2   14.41    0.54
   1  -9   2   14.45    0.66
   1   9   3    6.16    0.49
   1   9   3    5.63    0.54
  -1   9  -3    6.04    0.51
   1   9   3    4.69    0.43
   1   9   3    5.49    0.36
  -1   9  -3    6.51    0.46
  -1  -9  -3    5.49    0.40
  -1  -9  -3    5.53    0.57
   1  -9   3    5.48    0.47
   1  -9   3    5.90    0.45
  -1  -9  -3    5.53    0.33
   1   9   4   37.09    1.41
  -1   9  -4   35.15    1.39
   1   9   4   37.47    1.52
   1   9   4   35.02    1.29
  -1   9  -4   37.40    1.46
   1   9   4   36.37    1.34
   1  -9   4   35.58    1.43
  -1  -9  -4   35.66    1.51
  -1  -9  -4   36.02    1.35
  -1  -9  -4   37.10    1.26
   1  -9   4   34.36    1.39
   1   9   5   51.34    1.89
   1   9   5   49.34    1.95
  -1   9  -5   50.28    1.91
   1   9   5   49.50    1.73
  -1   9  -5   47.20    1.83
   1   9   5   46.56    1.84
  -1  -9  -5   48.09    1.80
   1  -9   5   47.63    1.88
  -1  -9  -5   48.70    1.68
  -1  -9  -5   48.40    1.95
   1  -9   5   46.46    1.82
   1   9   6   12.75    0.86
   1   9   6   12.41    0.81
   1   9   6   12.49    0.97
  -1   9  -6   12.66    0.87
   1   9   6   12.33    0.98
  -1   9  -6   13.17    0.97
  -1  -9  -6   12.99    1.00
   1  -9   6   13.66    0.99
   1  -9   6   12.95    0.90
  -1  -9  -6   11.88    0.73
  -1  -9  -6   13.58    0.88
   1   9   7    1.16    0.45
  -1   9  -7    1.86    0.59
   1   9   7    1.70    0.59
   1   9   7    1.83    0.49
  -1   9  -7    1.34    0.54
   1  -9   7    2.32    0.51
  -1  -9  -7    2.00    0.42
   1  -9   7    1.74    0.57
  -1  -9  -7    2.00    0.52
  -1  -9  -7    3.12    0.70
  -1   9  -8    1.12    0.60
   1   9   8    1.46    0.60
  -1   9  -8    1.79    0.64
   1   9   8    0.27    0.52
  -1  -9  -8    0.69    0.65
  -1  -9  -8    0.28    0.44
   1  -9   8   -0.06    0.60
  -1  -9  -8    1.09    0.53
   1  -9   8    0.51    0.63
   1   9   9    1.21    0.70
  -1   9  -9   -1.06    0.65
   1   9   9    0.42    0.72
  -1  -9  -9    0.84    0.60
  -1  -9  -9   -0.41    0.87
  -1  -9  -9    0.74    0.57
   1  -9   9    1.89    0.75
  -1   9 -10    0.96    0.90
   1   9  10    0.82    0.89
   1   9  10    1.24    0.98
   1  -9  10    0.23    0.86
  -1  -9 -10    0.62    0.73
  -1  -9 -10    0.25    0.78
   1   9  11    0.59    1.19
  -1   9 -11   -0.93    1.07
   1   9  11    0.01    0.99
  -1  -9 -11    1.49    1.02
   1  -9  11   -1.85    1.08
  -1  10  11    2.35    1.12
  -1  10  11    3.33    1.14
  -1 -10  11    1.94    1.22
   1 -10 -11    2.36    0.99
  -1  10  10   -0.38    0.78
   1  10 -10    1.11    0.96
  -1  10  10   -1.32    0.75
   1 -10 -10    0.16    0.69
   1 -10 -10    1.09    0.80
  -1 -10  10    0.08    0.95
   1  10  -9    7.09    1.07
  -1  10   9    6.87    1.01
  -1  10   9    8.23    1.15
   1 -10  -9    6.03    0.87
  -1 -10   9    6.73    1.03
   1 -10  -9    6.29    0.99
  -1  10   8    0.35    0.47
   1  10  -8    0.91    0.65
  -1  10   8    0.50    0.53
  -1  10   8    0.40    0.58
   1  10  -8    0.72    0.57
   1 -10  -8    0.68    0.58
  -1 -10   8    0.34    0.57
  -1 -10   8   -0.07    0.59
   1 -10  -8    0.37    0.73
   1 -10  -8   -0.02    0.45
   1 -10  -8    0.17    0.68
  -1  10   7    4.66    0.67
  -1  10   7    5.94    0.82
   1  10  -7    4.46    0.71
   1  10  -7    3.63    0.72
  -1  10   7    4.67    0.75
  -1 -10   7    4.64    0.75
   1 -10  -7    4.62    0.84
   1 -10  -7    5.69    0.63
   1 -10  -7    5.77    0.72
  -1 -10   7    4.09    0.72
   1  10  -6    0.26    0.46
   1  10  -6    1.11    0.41
  -1  10   6    1.30    0.38
  -1  10   6    1.17    0.33
  -1  10   6    0.43    0.46
   1 -10  -6    1.23    0.30
  -1 -10   6    1.72    0.44
   1 -10  -6    0.89    0.56
   1 -10  -6    0.69    0.37
  -1 -10   6    1.36    0.53
   1  10  -5   14.50    0.96
  -1  10   5   14.92    0.92
  -1  10   5   14.41    0.73
  -1  10   5   15.23    0.79
   1  10  -5   13.41    0.89
   1 -10  -5   14.37    0.69
   1 -10  -5   13.29    0.75
  -1 -10   5   14.50    0.96
   1 -10  -5   15.11    0.94
   1 -10  -5   13.65    0.99
   1  10  -4    3.06    0.47
  -1  10   4    3.03    0.33
  -1  10   4    2.78    0.44
  -1  10   4    3.43    0.38
  -1 -10   4    2.67    0.45
  -1 -10   4    3.50    0.48
   1 -10  -4    3.01    0.29
   1 -10  -4    3.81    0.60
   1 -10  -4    3.39    0.36
   1 -10  -4    2.63    0.42
  -1  10   3   66.17    2.56
  -1  10   3   62.06    1.89
   1  10  -3   59.10    2.08
  -1  10   3   63.77    1.92
   1  10  -3   63.63    2.09
  -1  10   3   61.97    2.04
   1  10  -3   61.13    1.80
   1 -10  -3   63.06    2.13
   1 -10  -3   60.59    1.91
   1 -10  -3   59.50    2.21
   1 -10  -3   63.89    2.03
   1 -10  -3   60.91    2.09
   1 -10  -3   59.77    1.87
  -1 -10   3   60.47    2.10
  -1 -10   3   62.40    2.13
  -1  10   2    0.30    0.08
  -1  10   2    0.32    0.27
   1  10  -2    0.33    0.21
   1  10  -2    0.14    0.19
   1  10  -2    0.54    0.21
  -1  10   2    0.20    0.10
   1  10  -2    0.58    0.14
  -1  10   2    0.47    0.20
   1  10  -2    0.36    0.20
  -1 -10   2    0.56    0.24
   1 -10  -2    0.25    0.21
   1 -10  -2    0.39    0.18
   1 -10  -2    0.26    0.07
   1 -10  -2    0.22    0.19
   1 -10  -2    0.22    0.10
   1 -10  -2   -0.07    0.54
  -1 -10   2    0.34    0.19
   1 -10  -2    0.18    0.26
   1  10  -1   25.44    0.92
   1  10  -1   26.60    0.98
  -1  10   1   25.33    0.93
   1  10  -1   26.06    0.97
  -1  10   1   25.74    1.02
   1  10  -1   26.61    0.96
   1  10  -1   26.01    0.85
   1 -10  -1   26.47    1.00
   1 -10  -1   25.12    0.93
  -1 -10   1   26.19    0.98
   1 -10  -1   26.39    0.98
   1 -10  -1   27.14    0.92
   1 -10  -1   26.43    1.05
  -1 -10   1   26.04    0.86
   1 -10  -1   21.46    1.20
   1  10   0   62.34    1.93
   1  10   0   66.07    2.05
  -1  10   0   63.68    2.04
  -1  10   0   62.58    1.86
  -1  10   0   62.65    1.86
   1  10   0   64.56    2.09
  -1  10   0   63.07    1.97
   1  10   0   63.83    1.93
   1  10   0   61.67    1.99
  -1  10   0   65.87    2.02
  -1 -10   0   65.65    2.01
  -1 -10   0   71.91    2.47
   1 -10   0   65.01    2.07
  -1 -10   0   65.03    2.06
   1 -10   0   65.06    2.01
   1 -10   0   64.98    1.97
  -1 -10   0   64.57    1.92
   1 -10   0   62.51    1.86
  -1 -10   0   64.20    1.96
   1 -10   0   62.40    2.02
   1 -10   0   63.55    1.85
  -1 -10   0   63.58    1.89
  -1 -10   0   66.43    1.98
  -1  10  -1  104.68    3.08
  -1  10  -1  107.19    3.09
  -1  10  -1  108.98    3.14
   1  10   1  105.82    3.18
  -1  10  -1  104.87    3.12
   1  10   1   99.88    3.09
   1  10   1  101.71    3.03
  -1  10  -1  103.81    3.09
   1  10   1  104.97    3.27
   1  10   1  101.89    3.04
  -1 -10  -1  105.03    3.06
  -1 -10  -1  103.55    3.07
   1 -10   1  104.40    3.08
   1 -10   1  104.92    3.12
   1 -10   1  106.08    3.07
  -1 -10  -1  109.87    3.28
  -1 -10  -1  102.24    3.04
  -1 -10  -1  104.03    3.18
  -1 -10  -1  116.42    3.76
  -1 -10  -1  102.08    3.07
   1 -10   1  100.56    3.13
   1  10   2    9.86    0.52
   1  10   2    9.82    0.93
  -1  10  -2    9.74    0.51
  -1  10  -2   10.02    0.48
  -1  10  -2   10.11    0.54
  -1  10  -2   10.09    0.52
   1  10   2   10.41    0.48
   1  10   2    9.56    0.66
   1  10   2   10.85    0.45
  -1 -10  -2   10.06    0.43
  -1 -10  -2    9.46    0.55
   1 -10   2   10.31    0.52
  -1 -10  -2   10.55    0.48
   1 -10   2   10.43    0.55
   1 -10   2    9.96    0.42
  -1 -10  -2   10.63    0.68
  -1  10  -3   18.79    0.86
  -1  10  -3   17.56    0.82
   1  10   3   20.46    0.76
   1  10   3   15.44    1.40
   1  10   3   17.77    0.73
  -1  10  -3   18.02    0.77
  -1 -10  -3   18.00    0.76
  -1 -10  -3   19.23    0.84
  -1 -10  -3   18.76    0.69
   1 -10   3   17.06    0.81
   1 -10   3   16.76    0.84
   1  10   4   11.32    0.60
  -1  10  -4   10.95    0.68
   1  10   4   11.74    0.73
   1  10   4   11.68    0.83
   1  10   4   11.98    0.64
  -1  10  -4   12.38    0.76
  -1 -10  -4   11.67    0.56
   1 -10   4   11.21    0.70
  -1 -10  -4   11.20    0.66
  -1 -10  -4   11.00    0.84
   1 -10   4   11.49    0.73
   1  10   5   27.47    1.41
   1  10   5   28.09    1.32
   1  10   5   29.00    1.17
  -1  10  -5   28.76    1.28
   1  10   5   28.74    1.22
  -1  10  -5   32.36    1.39
   1 -10   5   30.30    1.36
  -1 -10  -5   28.59    1.41
  -1 -10  -5   27.79    1.24
   1 -10   5   28.95    1.29
  -1 -10  -5   27.59    1.12
   1  10   6    2.19    0.42
  -1  10  -6    1.64    0.50
   1  10   6    1.59    0.54
   1  10   6    1.73    0.41
  -1  10  -6    1.58    0.43
   1  10   6    2.67    0.58
  -1 -10  -6    2.07    0.56
  -1 -10  -6    2.21    0.45
   1 -10   6    1.68    0.52
  -1 -10  -6    1.84    0.34
   1 -10   6    1.75    0.46
   1  10   7    2.91    0.64
   1  10   7    1.70    0.46
   1  10   7    2.10    0.51
  -1  10  -7    1.71    0.60
  -1  10  -7    1.83    0.52
   1 -10   7    1.50    0.54
  -1 -10  -7    0.97    0.47
  -1 -10  -7    1.68    0.63
  -1 -10  -7    1.47    0.44
   1 -10   7    1.68    0.58
   1  10   8    4.42    0.72
  -1  10  -8    3.05    0.73
   1  10   8    3.91    0.74
  -1 -10  -8    3.48    0.56
   1 -10   8    4.00    0.82
  -1 -10  -8    3.32    0.69
  -1 -10  -8    2.81    0.75
   1 -10   8    4.29    0.78
  -1  10  -9    1.85    0.85
   1  10   9    1.51    0.70
   1  10   9    0.78    0.70
   1 -10   9    1.07    0.73
  -1 -10  -9    1.20    0.66
  -1 -10  -9    0.78    0.60
   1  10  10    3.07    0.92
   1  10  10    2.13    0.98
  -1  10 -10    2.00    0.99
  -1 -10 -10    1.68    0.77
  -1 -10 -10    1.75    0.88
   1 -10  10    3.46    0.97
  -1  10 -11    1.17    1.16
   1  10  11    0.89    1.01
   1  10  11    3.13    1.24
  -1 -10 -11    1.68    1.02
   1 -10  11    0.44    1.17
  -1  11  11    1.62    1.08
   1 -11 -11    0.69    0.93
  -1 -11  11    0.60    1.26
   1  11 -10    4.79    1.16
  -1  11  10    5.08    1.01
  -1  11  10    4.03    1.01
   1 -11 -10    5.74    0.95
  -1 -11  10    4.18    1.17
  -1  11   9   -0.08    0.67
   1  11  -9    0.19    0.79
  -1  11   9    0.98    0.72
  -1 -11   9   -0.13    0.75
   1 -11  -9   -0.01    0.52
  -1  11   8    4.23    0.78
   1  11  -8    2.91    0.76
  -1  11   8    4.39    0.75
  -1  11   8    2.17    0.70
   1 -11  -8    3.33    0.62
   1 -11  -8    3.54    0.58
  -1 -11   8    1.66    0.74
  -1 -11   8    2.51    0.77
  -1  11   7    0.96    0.39
   1  11  -7    0.11    0.50
  -1  11   7    0.70    0.52
   1  11  -7    0.40    0.53
  -1  11   7    0.63    0.43
   1 -11  -7    0.20    0.57
   1 -11  -7    0.48    0.44
   1 -11  -7    0.40    0.34
   1 -11  -7    0.41    0.38
  -1 -11   7    0.75    0.51
  -1 -11   7    0.09    0.49
   1  11  -6    0.49    0.46
  -1  11   6   -0.23    0.34
  -1  11   6    0.71    0.28
  -1  11   6    0.09    0.43
   1  11  -6    0.31    0.38
   1 -11  -6   -0.21    0.38
  -1 -11   6    0.27    0.38
  -1 -11   6   -0.32    0.43
   1 -11  -6   -0.38    0.28
   1 -11  -6    0.13    0.58
   1 -11  -6    0.07    0.25
   1  11  -5    4.86    0.67
  -1  11   5    4.17    0.65
   1  11  -5    3.85    0.60
  -1  11   5    4.19    0.43
  -1  11   5    3.99    0.57
   1 -11  -5    3.69    0.48
   1 -11  -5    3.01    0.51
   1 -11  -5    3.94    0.64
  -1 -11   5    3.32    0.56
   1 -11  -5    3.76    0.39
  -1  11   4    1.18    0.72
   1  11  -4    1.39    0.19
  -1  11   4    0.96    0.24
   1  11  -4    1.03    0.34
  -1  11   4    0.96    0.23
  -1  11   4    1.43    0.36
   1  11  -4    1.30    0.21
  -1 -11   4    1.29    0.35
   1 -11  -4    1.27    0.25
   1 -11  -4    1.46    0.24
   1 -11  -4    1.74    0.40
   1 -11  -4    1.06    0.43
  -1 -11   4    1.14    0.37
   1  11  -3   20.48    0.66
   1  11  -3   17.52    0.75
  -1  11   3   22.91    1.32
   1  11  -3   20.51    0.93
   1  11  -3   18.95    0.94
  -1  11   3   19.07    0.71
  -1  11   3   19.59    0.88
   1 -11  -3   18.13    1.07
   1 -11  -3   19.86    0.74
   1 -11  -3   19.90    0.68
  -1 -11   3   20.01    0.96
   1 -11  -3   19.80    1.02
  -1 -11   3   19.58    0.91
   1 -11  -3   19.48    0.93
  -1  11   2   10.21    0.78
   1  11  -2    9.24    0.48
  -1  11   2    8.64    0.34
   1  11  -2    9.03    0.53
  -1  11   2    9.05    0.37
  -1  11   2    8.95    0.51
   1  11  -2    8.76    0.55
   1  11  -2    9.20    0.43
   1  11  -2    8.64    0.56
  -1 -11   2    9.35    0.60
   1 -11  -2    9.27    0.40
   1 -11  -2    7.89    0.52
  -1 -11   2    8.91    0.56
   1 -11  -2    9.12    0.59
   1 -11  -2    9.61    0.66
   1 -11  -2    8.95    0.49
   1 -11  -2    9.17    0.55
   1 -11  -2    9.19    0.32
   1  11  -1    0.59    0.13
   1  11  -1    0.47    0.18
   1  11  -1    0.51    0.21
   1  11  -1    0.45    0.20
   1  11  -1    0.38    0.16
  -1  11   1    0.28    0.15
  -1  11   1    0.56    0.24
   1 -11  -1    0.57    0.30
   1 -11  -1    0.54    0.18
   1 -11  -1    0.59    0.19
   1 -11  -1    1.01    0.37
   1 -11  -1    0.43    0.22
  -1 -11   1    0.44    0.21
   1 -11  -1    0.71    0.22
  -1 -11   1    0.35    0.13
   1  11   0   42.89    1.47
   1  11   0   40.06    1.34
  -1  11   0   42.82    1.27
  -1  11   0   42.06    1.39
  -1  11   0   40.91    1.45
  -1  11   0   42.79    1.26
   1  11   0   40.89    1.40
   1  11   0   41.40    1.50
   1  11   0   41.38    1.33
  -1  11   0   43.99    1.45
  -1 -11   0   41.09    1.36
   1 -11   0   41.93    1.44
  -1 -11   0   42.30    1.39
   1 -11   0   44.50    1.39
   1 -11   0   42.09    1.26
   1 -11   0   43.23    1.27
  -1 -11   0   43.14    1.48
   1 -11   0   43.96    1.49
  -1 -11   0   42.01    1.31
  -1 -11   0   47.40    1.90
   1 -11   0   43.38    1.43
  -1 -11   0   43.10    1.42
  -1 -11   0   42.70    1.33
  -1  11  -1  133.61    3.93
   1  11   1  131.95    3.83
   1  11   1  131.74    3.90
   1  11   1  138.26    4.00
  -1  11  -1  129.43    3.96
  -1  11  -1  130.01    3.86
   1  11   1  134.29    4.09
  -1  11  -1  128.16    3.87
  -1  11  -1  132.75    3.94
   1 -11   1  131.12    3.86
  -1 -11  -1  134.67    4.00
  -1 -11  -1  134.50    3.88
  -1 -11  -1  128.72    3.84
   1 -11   1  129.50    3.95
  -1 -11  -1  137.96    3.86
   1 -11   1  134.74    3.88
   1 -11   1  135.51    3.93
  -1 -11  -1  140.46    4.58
  -1 -11  -1  132.54    3.88
  -1 -11  -1  135.98    4.09
   1  11   2   84.82    2.60
  -1  11  -2   83.54    2.69
  -1  11  -2   83.30    2.60
   1  11   2   98.76    3.32
  -1  11  -2   83.19    2.66
  -1  11  -2   83.57    2.61
   1  11   2   89.80    2.63
  -1  11  -2   83.77    2.65
   1  11   2   85.46    2.57
   1  11   2   85.96    2.85
  -1 -11  -2   85.44    2.59
  -1 -11  -2   90.53    2.66
  -1 -11  -2   86.38    2.73
   1 -11   2   84.66    2.67
   1 -11   2   81.60    2.64
  -1 -11  -2   85.89    2.54
  -1 -11  -2   92.69    3.48
  -1 -11  -2   85.10    2.84
   1 -11   2   83.28    2.54
  -1  11  -3   11.47    0.62
   1  11   3   12.42    0.58
   1  11   3   13.61    0.84
   1  11   3   13.03    0.68
   1  11   3   12.81    0.57
  -1  11  -3   12.28    0.70
  -1 -11  -3   12.04    0.59
  -1 -11  -3   12.29    0.80
   1 -11   3   11.32    0.65
  -1 -11  -3   13.13    0.54
  -1 -11  -3   12.14    0.68
   1 -11   3   11.68    0.71
  -1  11  -4    0.14    0.26
   1  11   4   -0.15    0.60
  -1  11  -4    0.64    0.31
   1  11   4    0.38    0.34
   1  11   4    0.42    0.40
   1  11   4    0.82    0.22
   1  11   4    0.60    0.22
   1 -11   4    0.42    0.30
  -1 -11  -4    0.68    0.24
  -1 -11  -4    0.91    0.43
  -1 -11  -4    0.50    0.17
   1 -11   4    0.50    0.25
   1  11   5    6.10    0.72
   1  11   5    6.44    0.57
   1  11   5    6.52    0.72
  -1  11  -5    5.33    0.60
   1  11   5    5.35    0.49
  -1  11  -5    5.83    0.67
   1 -11   5    6.30    0.68
  -1 -11  -5    5.92    0.48
  -1 -11  -5    7.17    0.78
  -1 -11  -5    5.68    0.57
   1 -11   5    6.47    0.68
   1  11   6   13.69    1.02
  -1  11  -6   13.94    1.03
   1  11   6   15.25    0.90
  -1  11  -6   13.09    0.91
   1  11   6   12.93    0.80
   1  11   6   15.12    1.13
   1 -11   6   13.35    0.96
  -1 -11  -6   13.88    0.76
   1 -11   6   15.58    1.06
  -1 -11  -6   13.39    1.10
  -1 -11  -6   14.84    0.92
  -1  11  -7    1.12    0.50
   1  11   7    1.20    0.53
   1  11   7    1.70    0.50
   1  11   7    1.87    0.43
  -1  11  -7    1.69    0.60
   1 -11   7    1.28    0.67
  -1 -11  -7    2.14    0.68
   1 -11   7    0.67    0.48
  -1 -11  -7    1.71    0.50
  -1  11  -8   -0.63    0.61
   1  11   8    1.23    0.57
   1  11   8    0.70    0.55
  -1 -11  -8   -0.53    0.40
   1 -11   8   -0.28    0.56
   1 -11   8    0.12    0.65
  -1 -11  -8    0.11    0.47
  -1  11  -9    1.90    0.77
   1  11   9    2.80    0.82
   1  11   9    1.82    0.70
  -1 -11  -9    1.63    0.68
  -1 -11  -9    0.72    0.62
   1 -11   9    1.14    0.85
  -1  11 -10    1.04    1.00
   1  11  10    1.72    0.89
   1  11  10   -0.09    0.92
  -1 -11 -10   -0.35    0.78
   1 -11  10    0.57    0.92
  -1  11 -11    2.50    1.30
   1  11  11    1.90    1.19
   1  12 -11    4.55    1.21
  -1  12  11    3.78    1.43
  -1  12  10   -0.27    0.86
   1 -12 -10    0.69    0.76
  -1  12   9    2.80    0.78
   1  12  -9    3.59    0.94
  -1  12   9    4.08    0.82
  -1 -12   9    1.45    0.88
   1 -12  -9    1.76    0.70
   1 -12  -9    2.66    0.65
   1  12  -8    4.24    0.88
  -1  12   8    4.77    0.77
  -1 -12   8    3.77    0.88
   1 -12  -8    6.03    0.87
   1 -12  -8    4.35    0.96
  -1 -12   8    3.35    0.84
   1 -12  -8    4.40    0.72
  -1  12   7    4.92    0.75
   1  12  -7    4.28    0.73
  -1  12   7    5.56    0.85
   1  12  -7    6.54    1.00
  -1  12   7    4.11    0.66
   1 -12  -7    5.36    0.72
  -1 -12   7    2.95    0.70
   1 -12  -7    5.31    0.78
  -1 -12   7    4.83    1.18
   1 -12  -7    5.33    0.95
   1 -12  -7    3.84    0.55
  -1  12   6    0.38    0.50
  -1  12   6    0.32    0.33
  -1  12   6    0.85    0.33
  -1  12   6    0.75    0.99
   1  12  -6    0.82    0.44
   1  12  -6    1.15    0.50
  -1 -12   6    0.61    0.41
   1 -12  -6    0.19    0.34
   1 -12  -6    0.88    0.51
   1 -12  -6    0.94    0.28
  -1 -12   6    0.50    0.50
   1 -12  -6    0.30    0.60
   1  12  -5    2.80    0.49
  -1  12   5    2.75    0.39
  -1  12   5    2.30    0.48
   1 -12  -5    3.07    0.66
   1 -12  -5    2.57    0.33
  -1 -12   5    2.78    0.56
   1 -12  -5    2.81    0.46
   1 -12  -5    3.25    0.57
   1  12  -4    4.51    0.58
  -1  12   4    4.40    0.41
   1  12  -4    5.05    0.28
   1  12  -4    4.22    0.28
  -1  12   4    4.86    0.55
   1  12  -4    5.04    0.58
   1 -12  -4    4.95    0.66
   1 -12  -4    4.71    0.61
   1 -12  -4    4.58    0.64
   1 -12  -4    4.09    0.31
  -1 -12   4    4.41    0.54
  -1 -12   4    3.87    0.63
   1 -12  -4    4.49    0.40
   1  12  -3    2.62    0.45
  -1  12   3    2.26    0.36
   1  12  -3    2.76    0.49
   1  12  -3    2.37    0.22
  -1  12   3    1.96    0.22
   1  12  -3    1.87    0.36
  -1  12   3    2.88    0.67
   1 -12  -3    2.50    0.38
  -1 -12   3    2.05    0.37
   1 -12  -3    2.48    0.41
   1 -12  -3    1.84    0.33
   1 -12  -3    2.41    0.45
   1 -12  -3    2.18    0.26
  -1 -12   3    2.26    0.40
   1 -12  -3    2.12    0.18
  -1  12   2    4.01    0.21
   1  12  -2    3.74    0.41
  -1  12   2    3.46    0.37
   1  12  -2    3.89    0.43
   1  12  -2    4.01    0.43
  -1  12   2    4.15    0.23
   1  12  -2    3.79    0.30
   1  12  -2    3.84    0.35
   1 -12  -2    4.30    0.49
   1 -12  -2    4.27    0.38
  -1 -12   2    4.46    0.47
   1 -12  -2    3.80    0.43
  -1 -12   2    3.45    0.42
   1 -12  -2    4.08    0.51
   1 -12  -2    3.80    0.40
   1 -12  -2    4.03    0.18
   1  12  -1    0.05    0.20
   1  12  -1    0.17    0.18
  -1  12   1    0.05    0.17
   1  12  -1    0.09    0.16
   1  12  -1    0.26    0.19
   1  12  -1    0.09    0.12
  -1 -12   1    0.14    0.14
  -1 -12   1    0.09    0.21
  -1 -12   1    0.21    0.20
   1 -12  -1    0.09    0.15
   1 -12  -1   -0.29    0.32
   1 -12  -1    0.23    0.23
   1 -12  -1    0.56    0.27
   1 -12  -1    0.06    0.18
   1 -12  -1   -0.05    0.16
  -1  12   0    0.23    0.10
  -1  12   0    0.31    0.19
  -1  12   0    0.19    0.10
   1  12   0    0.15    0.18
   1  12   0    0.24    0.13
  -1  12   0    0.03    0.14
   1  12   0    0.45    0.26
   1  12   0    0.24    0.18
   1  12   0    0.29    0.14
  -1  12   0    0.18    0.20
  -1 -12   0    0.09    0.13
  -1 -12   0    0.44    0.22
   1 -12   0    0.25    0.21
  -1 -12   0    0.22    0.17
  -1 -12   0    0.06    0.15
   1 -12   0    0.17    0.22
   1 -12   0    0.08    0.18
  -1 -12   0    0.13    0.18
   1 -12   0    0.30    0.09
   1 -12   0    0.16    0.15
  -1 -12   0    0.03    0.35
  -1 -12   0    0.37    0.15
   1 -12   0    0.13    0.10
   1  12   1  383.10   11.13
  -1  12  -1  395.26   11.15
  -1  12  -1  399.01   11.20
   1  12   1  392.95   11.35
  -1  12  -1  397.56   11.19
   1  12   1  391.01   11.25
  -1  12  -1  397.51   11.11
   1  12   1  381.49   11.06
  -1 -12  -1  395.44   11.12
   1 -12   1  386.92   11.21
  -1 -12  -1  376.23   11.08
   1 -12   1  399.90   11.10
  -1 -12  -1  388.19   11.12
  -1 -12  -1  381.85   11.25
  -1 -12  -1  406.35   11.36
   1 -12   1  401.28   11.12
  -1 -12  -1  426.28   11.95
   1 -12   1  402.46   11.19
  -1 -12  -1  392.89   11.09
  -1  12  -2  208.79    6.07
   1  12   2  211.94    6.07
  -1  12  -2  221.58    6.14
  -1  12  -2  215.00    6.13
   1  12   2  214.55    6.07
  -1  12  -2  219.65    6.13
  -1  12  -2  210.58    6.08
   1  12   2  210.56    6.74
   1  12   2  210.14    6.02
   1  12   2  211.24    6.34
   1 -12   2  208.06    6.11
  -1 -12  -2  205.57    6.04
  -1 -12  -2  202.68    6.36
  -1 -12  -2  201.01    6.18
  -1 -12  -2  201.81    5.99
   1 -12   2  213.41    6.13
   1 -12   2  212.16    6.02
  -1 -12  -2  216.70    6.10
   1  12   3    6.63    0.42
  -1  12  -3    7.45    0.52
  -1  12  -3    6.84    0.55
   1  12   3    5.84    0.51
  -1  12  -3    6.38    0.50
   1  12   3    4.72    0.91
   1  12   3    6.14    0.63
   1  12   3    5.88    0.40
  -1 -12  -3    5.91    0.52
  -1 -12  -3    5.93    0.35
   1 -12   3    6.49    0.54
  -1 -12  -3    6.44    0.43
  -1 -12  -3    6.30    0.64
   1 -12   3    5.74    0.49
   1  12   4    0.39    0.33
   1  12   4    0.20    0.76
  -1  12  -4    0.28    0.26
  -1  12  -4    0.76    0.29
   1  12   4    0.34    0.20
  -1  12  -4    0.48    0.31
   1  12   4    0.71    0.23
   1  12   4    0.74    0.42
  -1 -12  -4    0.49    0.23
  -1 -12  -4    1.05    0.45
  -1 -12  -4    0.55    0.26
  -1 -12  -4    0.69    0.19
   1 -12   4   -0.02    0.24
   1 -12   4    0.03    0.30
  -1  12  -5    5.71    0.70
   1  12   5    5.04    0.48
   1  12   5    5.34    0.71
  -1  12  -5    4.30    0.60
   1  12   5    4.55    0.53
   1  12   5    5.26    0.75
   1 -12   5    3.99    0.59
  -1 -12  -5    5.47    0.44
  -1 -12  -5    5.17    0.57
   1 -12   5    4.50    0.69
  -1 -12  -5    5.50    0.79
   1  12   6   37.87    1.83
   1  12   6   36.71    1.52
   1  12   6   40.28    1.64
  -1  12  -6   41.47    1.80
   1  12   6   38.77    1.73
  -1  12  -6   37.90    1.69
  -1 -12  -6   39.33    1.48
   1 -12   6   41.11    1.78
  -1 -12  -6   39.78    1.64
   1 -12   6   39.04    1.73
  -1 -12  -6   39.91    1.86
  -1  12  -7    1.50    0.55
   1  12   7   -0.29    0.36
   1  12   7    0.35    0.54
  -1  12  -7   -0.04    0.49
   1  12   7    0.33    0.42
   1 -12   7   -0.18    0.45
  -1 -12  -7    1.10    0.65
  -1 -12  -7    0.23    0.38
   1 -12   7    0.78    0.55
  -1 -12  -7    0.68    0.36
   1  12   8    7.00    1.01
  -1  12  -8    9.36    1.16
   1  12   8    8.99    1.12
  -1 -12  -8    6.92    0.94
   1 -12   8    7.59    1.12
  -1 -12  -8    9.40    1.41
   1 -12   8    7.99    1.08
  -1 -12  -8    6.45    0.81
   1  12   9    1.30    0.78
  -1  12  -9    0.93    0.84
   1  12   9    2.25    0.82
  -1 -12  -9    1.87    0.62
   1 -12   9    1.90    0.86
  -1 -12  -9    1.01    0.60
  -1  12 -10    5.54    1.14
   1  12  10    3.84    1.10
   1 -12  10    2.33    1.03
  -1 -12 -10    3.38    0.89
  -1  13  10    2.48    1.02
  -1  13  10    4.18    1.05
  -1 -13  10    3.17    1.12
   1 -13 -10    3.28    0.91
  -1  13   9    1.96    0.73
  -1  13   9    2.68    0.80
  -1 -13   9    2.13    0.91
   1 -13  -9    1.56    0.67
   1 -13  -9    2.85    0.61
  -1  13   8   14.77    1.27
  -1  13   8   17.88    1.24
  -1 -13   8   16.18    1.47
   1 -13  -8   15.96    1.01
   1 -13  -8   17.34    1.22
  -1 -13   8   14.57    1.39
  -1  13   7   -0.14    1.01
   1  13  -7    0.40    0.86
  -1  13   7    1.01    0.41
  -1  13   7    0.63    0.52
  -1  13   7    1.35    0.46
   1 -13  -7    0.54    0.31
   1 -13  -7   -0.52    0.58
  -1 -13   7    1.51    0.61
   1 -13  -7    0.31    0.64
   1 -13  -7    0.33    0.45
  -1 -13   7    0.10    0.55
  -1  13   6    4.47    0.55
  -1  13   6    3.48    1.19
   1  13  -6    4.60    0.72
  -1  13   6    4.39    0.75
  -1  13   6    6.12    0.65
   1 -13  -6    3.69    0.48
   1 -13  -6    3.76    0.61
   1 -13  -6    4.33    0.61
   1 -13  -6    5.72    0.90
  -1 -13   6    5.46    0.85
  -1 -13   6    5.20    0.81
   1  13  -5   15.62    1.00
  -1  13   5   16.20    0.84
  -1  13   5   16.87    0.84
  -1  13   5   17.54    1.71
  -1  13   5   16.91    0.99
   1  13  -5   17.91    1.07
  -1 -13   5   11.98    1.44
   1 -13  -5   17.65    1.09
   1 -13  -5   16.78    0.72
   1 -13  -5   16.75    1.17
  -1 -13   5   15.50    1.05
   1 -13  -5   17.13    0.85
  -1  13   4    3.48    0.92
   1  13  -4    3.20    0.28
   1  13  -4    3.01    0.49
  -1  13   4    3.05    0.33
  -1  13   4    3.05    0.45
   1  13  -4    3.03    0.27
   1  13  -4    3.79    0.56
  -1  13   4    2.85    0.38
   1 -13  -4    3.93    0.65
  -1 -13   4    3.42    0.54
   1 -13  -4    2.46    0.45
   1 -13  -4    3.09    0.37
   1 -13  -4    3.18    0.29
   1 -13  -4    2.99    0.52
  -1 -13   4    3.72    0.56
   1 -13  -4    3.16    0.50
   1  13  -3  115.34    3.63
  -1  13   3  115.58    3.55
   1  13  -3  112.54    3.41
   1  13  -3  113.88    3.42
   1  13  -3  120.50    3.60
   1  13  -3  119.31    3.61
  -1  13   3  114.13    3.35
  -1  13   3  116.86    4.09
   1 -13  -3  116.33    3.68
  -1 -13   3  113.41    3.62
   1 -13  -3  114.90    3.54
   1 -13  -3  115.72    3.79
   1 -13  -3  114.31    3.62
  -1 -13   3  117.32    3.66
   1 -13  -3  115.12    3.37
   1 -13  -3  116.24    3.32
  -1  13   2    8.58    0.35
   1  13  -2    9.36    0.45
   1  13  -2    8.94    0.55
  -1  13   2    8.92    0.35
   1  13  -2    8.51    0.50
  -1 -13   2    8.89    0.62
   1 -13  -2    9.28    0.58
   1 -13  -2    7.56    1.08
  -1 -13   2    8.49    0.56
   1 -13  -2    8.53    0.58
   1  13  -1    5.98    0.40
  -1  13   1    5.86    0.43
   1  13  -1    6.33    0.47
   1  13  -1    5.54    0.48
   1  13  -1    5.45    0.35
   1  13  -1    5.58    0.48
   1 -13  -1    6.58    0.79
   1 -13  -1    5.84    0.54
   1 -13  -1    5.57    0.49
  -1 -13   1    5.65    0.45
  -1 -13   1    6.54    0.48
   1 -13  -1    5.91    0.43
   1 -13  -1    5.76    0.41
  -1 -13   1    5.83    0.38
   1 -13  -1    5.49    0.46
  -1  13   0   25.18    0.82
  -1  13   0   25.94    0.84
   1  13   0   26.23    1.10
  -1  13   0   25.90    1.03
  -1  13   0   25.92    1.06
   1  13   0   25.29    0.98
   1  13   0   26.09    0.93
  -1  13   0   26.11    0.98
   1  13   0   26.49    0.90
   1  13   0   27.86    1.07
  -1 -13   0   26.64    0.95
   1 -13   0   27.49    0.98
   1 -13   0   25.10    0.82
   1 -13   0   25.99    1.08
   1 -13   0   26.13    0.83
  -1 -13   0   26.82    0.96
  -1 -13   0   26.61    0.89
   1 -13   0   27.28    1.04
  -1 -13   0   26.76    1.07
   1 -13   0   25.11    1.04
  -1 -13   0   27.11    0.92
  -1 -13   0   26.52    1.01
   1  13   1    0.35    0.18
  -1  13  -1    0.89    0.21
   1  13   1    0.76    0.23
  -1  13  -1    1.03    0.19
  -1  13  -1    0.82    0.23
  -1  13  -1    0.64    0.18
  -1  13  -1    0.69    0.22
   1  13   1    0.71    0.32
  -1 -13  -1    0.30    0.20
  -1 -13  -1    0.21    0.23
   1 -13   1    0.77    0.25
  -1 -13  -1    0.46    0.32
   1 -13   1    1.07    0.29
   1 -13   1    0.65    0.20
   1 -13   1    0.81    0.17
  -1 -13  -1    0.33    0.17
  -1 -13  -1    0.42    0.26
  -1 -13  -1    0.54    0.17
  -1 -13  -1    1.15    0.53
  -1  13  -2    0.79    0.22
  -1  13  -2    1.14    0.23
   1  13   2    1.30    0.19
   1  13   2    1.16    0.22
  -1  13  -2    1.04    0.24
   1  13   2    1.48    0.26
  -1  13  -2    1.09    0.26
   1  13   2    1.47    0.35
  -1  13  -2    1.20    0.27
  -1 -13  -2    1.79    0.25
  -1 -13  -2    0.69    0.25
   1 -13   2    1.02    0.27
  -1 -13  -2    1.46    0.31
  -1 -13  -2    1.27    0.20
   1 -13   2    0.84    0.22
  -1 -13  -2    1.22    0.24
  -1 -13  -2    1.57    0.39
   1 -13   2    1.62    0.27
   1  13   3   48.46    2.26
  -1  13  -3   41.40    1.54
  -1  13  -3   42.82    1.51
   1  13   3   40.72    1.43
  -1  13  -3   42.96    1.58
   1  13   3   43.11    1.75
  -1  13  -3   42.17    1.43
   1  13   3   44.66    1.52
  -1 -13  -3   44.26    1.75
  -1 -13  -3   42.56    1.38
  -1 -13  -3   42.98    1.46
   1 -13   3   40.34    1.53
   1 -13   3   40.84    1.57
  -1 -13  -3   41.06    1.57
  -1  13  -4    1.82    0.43
   1  13   4    1.58    0.49
   1  13   4    1.53    0.39
  -1  13  -4    1.22    0.36
   1  13   4    1.30    0.32
   1  13   4    2.67    0.92
  -1  13  -4    1.62    0.35
   1  13   4    1.61    0.27
  -1 -13  -4    1.96    0.50
  -1 -13  -4    1.63    0.24
   1 -13   4    1.69    0.42
   1 -13   4    1.10    0.32
  -1 -13  -4    1.67    0.32
  -1 -13  -4    1.74    0.36
  -1  13  -5    0.16    0.37
  -1  13  -5    0.88    0.45
   1  13   5    1.14    0.51
   1  13   5    0.82    0.28
   1  13   5    0.58    0.41
   1  13   5    0.31    0.30
  -1 -13  -5    0.89    0.23
  -1 -13  -5    1.08    0.54
  -1 -13  -5    1.16    0.34
   1 -13   5    0.95    0.39
  -1 -13  -5    1.06    0.37
   1 -13   5    0.42    0.38
  -1  13  -6    1.41    0.51
   1  13   6    0.70    0.35
  -1  13  -6    0.91    0.49
   1  13   6    2.88    1.19
   1  13   6    1.65    0.41
   1  13   6    1.00    0.50
   1  13   6    0.87    0.59
   1 -13   6    1.66    0.54
  -1 -13  -6    1.54    0.31
   1 -13   6    1.60    0.52
  -1 -13  -6    1.64    0.64
  -1 -13  -6    1.52    0.41
   1  13   7    0.76    0.43
   1  13   7    0.79    0.55
  -1  13  -7    0.74    0.52
   1  13   7    0.64    1.57
   1  13   7    1.12    0.43
  -1  13  -7    1.49    0.78
   1 -13   7    0.50    0.53
  -1 -13  -7    1.56    0.52
   1 -13   7    0.97    0.56
  -1 -13  -7    0.70    0.40
  -1 -13  -7    0.79    0.67
   1  13   8    0.05    0.55
  -1  13  -8   -0.49    0.68
   1  13   8    0.32    0.60
  -1 -13  -8    0.82    0.47
   1 -13   8   -0.17    0.68
   1 -13   8    0.54    0.64
  -1  13  -9    0.01    0.74
   1  13   9    0.46    0.70
   1  13   9    1.25    0.70
  -1 -13  -9   -0.15    0.54
  -1 -13  -9    1.13    0.67
   1 -13   9    0.20    0.76
   1  13  10    1.61    1.08
  -1  13 -10    2.00    1.11
   1  13  10    4.57    1.03
  -1 -13 -10    2.66    0.88
   1 -13  10    3.46    1.04
   1  14 -10    2.14    1.01
  -1 -14  10    1.29    1.02
   1 -14 -10    0.92    0.78
  -1  14   9    1.84    0.74
  -1  14   9   -0.04    0.68
   1  14  -9    1.70    0.79
  -1 -14   9    1.85    0.87
   1 -14  -9    1.02    0.63
   1 -14  -9    1.39    0.63
  -1  14   8    1.22    1.50
  -1  14   8    1.04    0.61
  -1  14   8    0.55    0.61
  -1 -14   8   -0.65    0.69
   1 -14  -8    0.41    0.45
   1 -14  -8   -0.21    0.39
  -1 -14   8   -0.15    0.75
  -1  14   7    5.68    0.67
  -1  14   7    5.13    0.70
   1  14  -7    5.93    0.92
  -1 -14   7    5.67    0.97
   1 -14  -7    4.56    0.57
  -1 -14   7    5.97    0.99
   1 -14  -7    5.66    0.74
   1 -14  -7    3.91    0.80
   1  14  -6    0.85    0.49
   1  14  -6    0.69    0.17
   1  14  -6    1.53    0.52
  -1  14   6   -0.04    0.89
  -1  14   6    0.34    0.46
  -1  14   6    0.25    0.28
  -1  14   6    0.41    0.33
   1 -14  -6   -0.38    0.61
   1 -14  -6    0.38    0.25
   1 -14  -6    0.82    0.38
  -1 -14   6    0.59    0.47
   1 -14  -6    0.58    0.50
  -1 -14   6    0.74    0.55
  -1  14   5   12.28    0.62
  -1  14   5   10.53    1.48
  -1  14   5   10.65    0.82
   1  14  -5   10.23    0.88
  -1  14   5   10.79    0.68
   1  14  -5   11.75    0.89
   1 -14  -5   10.03    0.68
   1 -14  -5   10.45    0.96
  -1 -14   5   10.87    0.98
   1 -14  -5   10.66    0.99
   1 -14  -5   11.57    0.56
  -1 -14   5    7.29    1.27
  -1  14   4   -0.36    0.49
   1  14  -4    0.08    0.18
  -1  14   4    0.05    0.20
  -1  14   4    0.04    0.32
   1  14  -4    0.22    0.30
   1  14  -4   -0.01    0.30
  -1  14   4    0.01    0.16
   1  14  -4   -0.56    0.31
   1 -14  -4    0.37    0.38
   1 -14  -4   -0.64    0.43
  -1 -14   4   -0.17    0.35
  -1 -14   4   -0.13    0.27
   1 -14  -4   -0.34    0.18
   1 -14  -4    0.17    0.27
   1 -14  -4   -0.06    0.12
   1 -14  -4    0.05    0.33
  -1  14   3    6.74    0.54
   1  14  -3    7.10    0.44
  -1  14   3    6.23    0.34
   1  14  -3    7.93    0.59
   1  14  -3    8.01    0.63
   1  14  -3    7.45    0.46
   1  14  -3    7.45    0.62
  -1  14   3    6.49    0.38
   1 -14  -3    6.51    0.54
  -1 -14   3    7.14    0.68
  -1 -14   3    6.88    0.59
   1 -14  -3    5.91    0.57
   1 -14  -3    5.82    0.70
   1 -14  -3    7.04    0.62
   1 -14  -3    7.58    0.66
   1 -14  -3    6.66    0.31
   1 -14  -3    6.74    0.38
   1  14  -2   10.48    0.60
  -1  14   2   10.03    0.38
   1  14  -2    9.74    0.50
   1  14  -2    9.86    0.56
   1  14  -2    9.22    0.63
  -1  14   2   10.16    0.40
   1  14  -2   10.62    0.65
  -1 -14   2   10.66    0.69
   1 -14  -2   10.67    0.73
  -1 -14   2    9.35    0.62
   1 -14  -2   10.58    0.58
   1 -14  -2    9.70    0.63
   1 -14  -2    9.91    0.63
   1 -14  -2    9.32    0.74
   1  14  -1    1.44    0.31
   1  14  -1    1.11    0.27
   1  14  -1    0.93    0.19
   1  14  -1    1.05    0.22
   1  14  -1    1.05    0.26
  -1  14   1    1.09    0.24
   1 -14  -1    0.95    0.22
   1 -14  -1    1.37    0.26
  -1 -14   1    1.07    0.32
   1 -14  -1    0.86    0.30
  -1 -14   1    0.95    0.27
   1 -14  -1    1.56    0.51
   1 -14  -1    1.06    0.37
  -1 -14   1    1.27    0.27
  -1 -14   1    1.03    0.21
   1 -14  -1    0.97    0.27
   1  14   0   10.82    0.49
   1  14   0   10.19    0.52
  -1  14   0   10.70    0.43
  -1  14   0   11.67    0.63
  -1  14   0   10.73    0.66
   1  14   0   10.85    0.65
   1  14   0   10.08    0.68
   1  14   0   10.24    0.57
  -1  14   0   11.03    0.41
  -1  14   0   10.51    0.56
   1 -14   0   11.02    0.41
   1 -14   0   10.25    0.63
   1 -14   0   11.94    0.57
  -1 -14   0   10.01    0.48
  -1 -14   0   10.72    0.65
   1 -14   0   10.62    0.41
  -1 -14   0   10.70    0.51
   1 -14   0   11.50    0.68
  -1 -14   0   10.77    0.61
  -1 -14   0   10.16    0.53
  -1 -14   0   10.83    1.00
  -1 -14   0   10.76    0.53
   1 -14   0   11.22    0.63
  -1  14  -1   81.75    2.50
  -1  14  -1   81.60    2.51
   1  14   1   75.58    2.42
  -1  14  -1   78.37    2.37
  -1  14  -1   77.90    2.43
   1  14   1   78.58    2.33
   1  14   1   79.25    2.55
   1  14   1   79.55    2.65
  -1 -14  -1   75.98    2.39
  -1 -14  -1   75.65    2.36
  -1 -14  -1   79.31    2.40
   1 -14   1   77.42    2.52
  -1 -14  -1   74.67    2.54
  -1 -14  -1   79.87    2.67
   1 -14   1   79.48    2.49
   1 -14   1   82.00    2.39
  -1 -14  -1   80.65    2.36
  -1 -14  -1   78.58    2.54
   1 -14   1   79.18    2.37
  -1 -14  -1   69.40    3.10
  -1  14  -2    1.03    0.24
  -1  14  -2    1.26    0.25
   1  14   2    1.43    0.43
  -1  14  -2    0.90    0.23
   1  14   2    1.03    0.50
  -1  14  -2    1.25    0.29
   1  14   2    1.45    0.25
   1  14   2    1.26    0.22
   1  14   2    0.94    0.24
   1 -14   2    1.48    0.27
  -1 -14  -2    1.11    0.30
  -1 -14  -2    1.41    0.43
  -1 -14  -2    1.34    0.33
   1 -14   2    1.34    0.25
  -1 -14  -2    1.23    0.88
   1 -14   2    1.18    0.30
  -1 -14  -2    1.32    0.20
  -1 -14  -2    1.66    0.25
  -1 -14  -2    1.15    0.23
  -1  14  -3    0.53    0.24
   1  14   3    0.38    0.18
   1  14   3    0.24    0.20
   1  14   3    1.02    0.44
   1  14   3    0.34    0.27
  -1  14  -3    0.50    0.22
  -1  14  -3    0.59    0.31
   1  14   3    0.00    0.52
  -1  14  -3   -0.13    0.22
  -1 -14  -3    0.53    0.40
  -1 -14  -3    0.50    0.29
  -1 -14  -3    0.00    0.23
   1 -14   3    0.46    0.25
   1 -14   3    0.00    0.27
  -1 -14  -3    0.34    0.15
  -1 -14  -3    0.53    0.20
   1  14   4    1.97    0.50
   1  14   4    1.30    0.39
  -1  14  -4    0.93    0.34
  -1  14  -4    1.07    0.39
   1  14   4    1.37    0.27
   1  14   4    1.03    0.70
  -1  14  -4    1.03    0.35
  -1 -14  -4    1.04    0.34
  -1 -14  -4    1.05    0.29
   1 -14   4    0.83    0.41
  -1 -14  -4    1.11    0.47
   1 -14   4    1.22    0.34
  -1 -14  -4    1.36    0.23
  -1  14  -5    8.96    0.82
   1  14   5    8.01    0.60
   1  14   5    9.34    0.93
   1  14   5    8.17    0.66
   1  14   5    8.48    0.80
   1  14   5    6.35    1.58
  -1  14  -5    8.31    0.76
  -1  14  -5    7.54    0.68
   1 -14   5    8.16    0.84
  -1 -14  -5    8.07    0.73
  -1 -14  -5    9.63    1.00
  -1 -14  -5    8.69    0.66
   1 -14   5    7.02    0.73
  -1 -14  -5    8.19    0.52
   1  14   6   23.92    1.19
  -1  14  -6   23.35    1.35
   1  14   6   24.57    1.48
   1  14   6   21.33    1.25
  -1  14  -6   21.48    1.25
   1  14   6   24.01    1.11
   1 -14   6   24.45    1.38
   1 -14   6   22.51    1.31
  -1 -14  -6   26.45    1.57
  -1 -14  -6   24.98    1.20
  -1 -14  -6   23.43    1.03
   1  14   7   25.44    1.35
   1  14   7   24.98    1.37
  -1  14  -7   26.48    1.54
   1  14   7   26.40    1.44
   1 -14   7   22.18    1.42
  -1 -14  -7   26.19    1.17
   1 -14   7   25.25    1.49
   1  14   8    0.16    0.61
   1  14   8    1.50    0.68
  -1  14  -8    1.21    0.72
   1 -14   8    0.21    0.67
  -1 -14  -8    0.98    0.58
  -1 -14  -8    1.13    0.48
   1 -14   8    1.04    0.69
   1  14   9   -0.03    0.69
  -1  14  -9   -0.42    0.84
   1  14   9    1.00    0.71
  -1 -14  -9    0.54    0.64
  -1 -14  -9    0.95    0.59
   1 -14   9   -0.34    0.75
   1  14  10    3.21    1.04
   1  14  10    1.70    1.07
  -1  14 -10    4.25    1.22
  -1 -14 -10    3.72    0.95
   1 -14  10    4.84    1.16
  -1  15  10    0.74    0.88
   1  15 -10   -0.27    0.96
   1 -15 -10    0.67    0.74
  -1 -15  10    0.46    1.13
   1  15  -9    1.12    0.79
  -1  15   9    0.01    0.70
  -1  15   9    0.54    0.75
   1 -15  -9   -0.56    0.60
  -1 -15   9    1.67    0.88
  -1  15   8    3.31    0.74
   1  15  -8    4.02    0.87
  -1  15   8    3.12    0.69
  -1 -15   8    2.55    0.94
   1 -15  -8    3.25    0.65
  -1 -15   8    4.64    0.91
   1 -15  -8    2.80    0.51
   1  15  -7    1.04    0.21
  -1  15   7    0.67    1.13
  -1  15   7    1.50    0.52
   1  15  -7    1.22    0.60
  -1  15   7    0.73    0.42
  -1  15   7    2.19    0.64
  -1 -15   7    0.69    0.65
   1 -15  -7    1.63    0.45
   1 -15  -7    1.87    1.11
  -1 -15   7    0.75    0.61
   1 -15  -7    1.03    0.35
  -1  15   6    6.68    0.60
  -1  15   6    5.30    0.72
   1  15  -6    6.87    0.88
   1  15  -6    5.28    0.54
  -1  15   6    5.64    0.79
   1  15  -6    7.14    0.84
   1 -15  -6    8.22    1.09
   1 -15  -6    6.82    0.65
  -1 -15   6    8.67    0.90
  -1 -15   6    7.17    0.91
   1 -15  -6    6.22    0.51
  -1  15   5    4.34    0.49
   1  15  -5    4.78    0.68
   1  15  -5    5.34    0.72
  -1  15   5    6.63    1.29
  -1  15   5    5.06    0.46
  -1  15   5    5.44    0.68
   1 -15  -5    4.99    0.38
   1 -15  -5    4.73    0.79
   1 -15  -5    4.76    0.67
  -1 -15   5    4.77    0.83
   1 -15  -5    6.22    0.91
   1 -15  -5    4.54    0.52
   1  15  -4   10.09    0.77
  -1  15   4    9.29    0.72
   1  15  -4   10.13    0.75
  -1  15   4    9.42    0.49
   1  15  -4    9.60    0.78
  -1  15   4    8.17    1.14
   1 -15  -4    9.71    0.55
   1 -15  -4   10.24    0.77
   1 -15  -4    9.75    0.95
   1 -15  -4   10.22    0.44
  -1 -15   4    9.15    0.76
   1 -15  -4    9.20    0.84
  -1 -15   4   10.82    0.86
   1 -15  -4    9.77    0.88
   1 -15  -4   10.11    0.73
  -1  15   3   27.61    1.55
  -1  15   3   27.08    1.11
   1  15  -3   25.76    1.14
  -1  15   3   26.24    0.91
  -1  15   3   26.40    0.88
   1  15  -3   26.38    1.00
   1  15  -3   26.21    0.98
   1  15  -3   25.82    1.17
   1  15  -3   26.87    1.17
  -1 -15   3   26.01    1.23
   1 -15  -3   26.18    0.88
   1 -15  -3   25.66    1.16
   1 -15  -3   26.56    1.35
   1 -15  -3   26.43    1.25
   1 -15  -3   26.30    1.18
   1 -15  -3   25.73    0.83
   1 -15  -3   25.54    1.08
  -1 -15   3   24.70    1.15
   1  15  -2   10.56    0.53
  -1  15   2   10.03    0.42
   1  15  -2   11.29    0.63
   1  15  -2   10.82    0.63
   1  15  -2   10.64    0.69
   1  15  -2   11.43    0.67
   1 -15  -2   10.50    0.82
  -1 -15   2   10.20    0.65
   1 -15  -2   11.21    0.77
   1 -15  -2   10.30    0.68
   1 -15  -2   10.76    0.68
  -1 -15   2   12.05    0.72
   1 -15  -2   11.06    0.62
   1  15  -1   27.10    1.11
  -1  15   1   25.59    1.04
   1  15  -1   26.20    0.97
   1  15  -1   21.72    1.26
   1  15  -1   26.79    0.95
   1  15  -1   26.42    1.11
  -1 -15   1   25.81    1.13
   1 -15  -1   27.36    1.01
   1 -15  -1   26.29    1.04
  -1 -15   1   26.90    0.98
   1 -15  -1   26.77    1.12
  -1 -15   1   25.44    1.03
  -1 -15   1   25.74    1.04
   1 -15  -1   25.32    1.34
   1 -15  -1   25.93    1.53
   1  15   0   29.17    1.11
  -1  15   0   28.77    0.95
  -1  15   0   28.32    1.10
   1  15   0   28.82    1.06
  -1  15   0   28.78    1.20
  -1  15   0   29.28    0.92
   1  15   0   29.96    1.25
  -1  15   0   29.50    1.19
   1  15   0   29.41    1.19
   1  15   0   28.98    1.00
   1 -15   0   28.16    0.92
  -1 -15   0   28.55    1.01
  -1 -15   0   31.33    1.72
   1 -15   0   27.92    1.17
  -1 -15   0   30.86    1.05
   1 -15   0   29.64    1.23
  -1 -15   0   29.56    1.22
   1 -15   0   31.23    1.17
  -1 -15   0   29.50    1.06
  -1 -15   0   31.06    1.07
   1 -15   0   29.43    0.92
  -1 -15   0   29.96    1.15
   1  15   1   15.94    0.61
  -1  15  -1   15.62    0.66
  -1  15  -1   15.24    0.78
   1  15   1   17.56    0.84
  -1  15  -1   15.98    0.73
   1  15   1   16.37    0.93
   1  15   1   16.81    0.74
  -1 -15  -1   16.22    0.85
  -1 -15  -1   15.73    0.69
  -1 -15  -1   16.35    0.71
   1 -15   1   16.14    0.70
   1 -15   1   15.83    0.78
  -1 -15  -1   16.28    0.67
  -1 -15  -1   16.85    0.65
   1 -15   1   15.92    0.82
  -1 -15  -1   17.83    0.96
   1 -15   1   15.35    0.65
  -1 -15  -1   18.69    0.89
   1  15   2   67.39    2.10
  -1  15  -2   67.12    2.14
  -1  15  -2   61.34    2.31
   1  15   2   63.35    2.11
  -1  15  -2   66.04    2.18
  -1  15  -2   67.73    2.17
   1  15   2   65.64    2.04
   1  15   2   66.95    2.42
  -1  15  -2   67.62    2.16
  -1 -15  -2   67.25    2.32
  -1 -15  -2   66.55    2.05
  -1 -15  -2   67.03    2.07
  -1 -15  -2   67.17    2.30
  -1 -15  -2   67.15    2.19
  -1 -15  -2   70.91    2.46
   1 -15   2   69.66    2.20
   1 -15   2   67.04    2.15
   1 -15   2   67.90    2.12
  -1  15  -3   14.58    0.78
  -1  15  -3   14.24    0.71
   1  15   3   14.54    0.77
   1  15   3   15.81    1.36
  -1  15  -3   15.32    0.79
  -1  15  -3   14.84    0.86
   1  15   3   14.03    0.99
  -1  15  -3   14.98    0.74
   1  15   3   14.25    0.66
   1  15   3   15.04    0.70
  -1 -15  -3   15.14    1.02
   1 -15   3   13.95    0.79
  -1 -15  -3   15.13    0.86
  -1 -15  -3   14.76    0.63
  -1 -15  -3   16.16    0.80
   1 -15   3   15.67    0.86
  -1 -15  -3   16.12    0.70
  -1  15  -4   10.02    0.57
   1  15   4    8.18    0.66
  -1  15  -4    9.66    0.73
   1  15   4    9.63    0.58
   1  15   4    9.41    0.87
   1  15   4    9.68    0.73
  -1  15  -4   10.49    0.70
  -1  15  -4   10.77    0.85
  -1 -15  -4    9.82    0.52
   1 -15   4    9.63    0.79
   1 -15   4    9.79    0.75
  -1 -15  -4    8.45    0.71
  -1 -15  -4    9.48    0.93
  -1 -15  -4    8.69    0.61
  -1  15  -5   21.05    1.14
   1  15   5   23.39    1.05
  -1  15  -5   22.37    1.21
  -1  15  -5   22.18    1.08
   1  15   5   22.48    1.00
   1  15   5   21.01    1.33
   1  15   5   21.12    1.14
   1 -15   5   20.49    1.15
  -1 -15  -5   21.38    1.06
   1 -15   5   19.91    1.21
  -1 -15  -5   22.01    0.90
  -1 -15  -5   22.46    1.40
  -1 -15  -5   20.76    1.11
  -1  15  -6   43.26    1.87
  -1  15  -6   35.71    1.58
   1  15   6   37.99    1.94
   1  15   6   38.35    1.54
   1  15   6   39.35    1.64
   1  15   6   39.06    1.71
  -1  15  -6   35.02    1.72
   1 -15   6   39.98    1.83
  -1 -15  -6   38.73    1.97
   1 -15   6   40.15    1.77
  -1 -15  -6   39.66    1.70
  -1 -15  -6   39.96    1.45
  -1 -15  -6   40.91    1.64
   1  15   7    1.46    1.94
   1  15   7    3.14    0.84
  -1  15  -7    4.01    0.73
   1  15   7    4.08    0.75
   1  15   7    2.55    0.58
   1 -15   7    2.36    0.67
  -1 -15  -7    4.31    0.73
   1 -15   7    2.18    0.67
  -1 -15  -7    2.53    0.51
  -1  15  -8   -0.52    0.70
   1  15   8   -0.11    0.59
   1  15   8    0.23    0.64
   1 -15   8    0.17    0.65
   1 -15   8    0.29    0.62
  -1 -15  -8   -0.46    0.51
  -1  15  -9    1.61    0.91
   1  15   9    3.46    0.80
   1  15   9    2.16    0.83
  -1 -15  -9    2.34    0.72
   1  15  10    0.63    0.91
  -1  15 -10    0.52    1.13
   1 -15  10   -0.50    0.93
  -1 -15 -10   -0.33    0.80
  -1  16  10    2.82    1.03
   1  16 -10    2.17    1.17
  -1 -16  10    3.47    1.25
   1 -16 -10    4.40    0.93
   1  16  -9    6.36    1.13
  -1  16   9    6.06    0.96
  -1  16   9    6.24    1.02
   1 -16  -9    5.75    0.89
  -1 -16   9    5.74    1.10
  -1  16   8    0.05    0.59
  -1  16   8   -1.47    1.44
   1  16  -8    0.20    0.24
  -1  16   8    1.00    0.57
   1  16  -8   -1.32    0.62
  -1 -16   8    0.44    0.80
   1 -16  -8    0.72    0.41
  -1 -16   8   -0.95    0.72
   1 -16  -8   -0.98    0.46
  -1  16   7    1.00    0.48
   1  16  -7   -0.45    0.54
  -1  16   7    0.56    1.25
  -1  16   7   -0.18    0.35
  -1  16   7   -0.12    0.50
  -1 -16   7    0.43    0.69
  -1 -16   7    0.24    0.60
   1 -16  -7    0.44    0.43
   1 -16  -7    0.34    0.35
   1  16  -6    1.04    0.52
  -1  16   6    2.01    1.02
  -1  16   6    0.64    0.30
   1  16  -6    0.22    0.48
  -1  16   6    1.28    0.66
  -1  16   6    1.27    0.48
   1 -16  -6    1.61    0.30
   1 -16  -6    0.92    0.45
  -1 -16   6    2.77    0.56
   1 -16  -6    1.46    0.39
   1 -16  -6    1.43    0.68
  -1  16   5    0.57    0.74
  -1  16   5    0.72    0.22
  -1  16   5    0.00    0.40
   1  16  -5    0.26    0.42
   1  16  -5    0.39    0.42
   1  16  -5    0.14    0.41
  -1  16   5    0.50    0.29
   1 -16  -5    0.43    0.19
   1 -16  -5    0.84    0.46
   1 -16  -5    0.24    0.38
   1 -16  -5    0.26    0.53
   1 -16  -5    0.19    0.28
  -1 -16   5   -0.22    0.45
   1  16  -4   21.83    1.11
   1  16  -4   20.28    1.11
  -1  16   4   20.90    1.04
  -1  16   4   21.94    0.81
   1  16  -4   21.00    0.90
  -1  16   4   21.33    1.56
   1  16  -4   20.93    1.09
   1 -16  -4   19.19    1.07
   1 -16  -4   20.61    1.18
  -1 -16   4   20.67    1.12
   1 -16  -4   20.06    1.17
   1 -16  -4   21.30    1.03
   1 -16  -4   21.22    0.74
   1 -16  -4   21.01    0.84
  -1 -16   4   21.21    1.19
   1 -16  -4   22.35    1.32
   1  16  -3   22.95    1.10
   1  16  -3   24.06    1.08
   1  16  -3   22.79    1.10
   1  16  -3   22.65    0.92
  -1  16   3   23.53    0.81
   1  16  -3   23.49    0.94
  -1  16   3   23.59    1.03
  -1  16   3   23.64    0.83
   1 -16  -3   22.71    0.74
   1 -16  -3   23.54    1.21
  -1 -16   3   21.89    1.09
  -1 -16   3   22.35    1.13
   1 -16  -3   23.81    1.04
   1 -16  -3   24.79    1.31
   1 -16  -3   23.65    1.12
   1 -16  -3   23.27    1.13
   1 -16  -3   22.44    0.78
   1  16  -2    1.28    0.33
   1  16  -2    0.67    0.28
   1  16  -2    0.95    0.28
   1  16  -2    0.61    0.20
   1  16  -2    0.76    0.32
  -1 -16   2    0.87    0.32
   1 -16  -2    0.60    0.31
   1 -16  -2    1.18    0.40
   1 -16  -2    1.13    0.42
   1 -16  -2    1.20    0.30
  -1 -16   2    0.58    0.28
   1 -16  -2    0.16    0.70
   1  16  -1    0.35    0.27
  -1  16   1    0.58    0.27
   1  16  -1    0.74    0.31
   1  16  -1    0.56    0.21
   1  16  -1    0.39    0.18
   1  16  -1    0.61    0.27
  -1 -16   1    0.57    0.23
  -1 -16   1    0.52    0.26
   1 -16  -1    0.66    0.29
  -1 -16   1    0.73    0.26
   1 -16  -1    1.01    0.52
   1 -16  -1    1.28    0.43
   1 -16  -1    0.95    0.25
   1 -16  -1    0.90    0.30
   1 -16  -1    0.59    0.25
  -1 -16   1    0.91    0.37
   1  16   0    0.94    0.23
  -1  16   0    0.94    0.26
  -1  16   0    1.56    0.18
  -1  16   0    1.07    0.32
   1  16   0    1.55    0.24
  -1  16   0    1.72    0.33
   1  16   0    1.26    0.29
  -1  16   0    1.48    0.22
   1  16   0    1.88    0.44
   1  16   0    1.39    0.32
  -1 -16   0    1.11    0.23
  -1 -16   0    1.12    0.24
   1 -16   0    1.41    0.32
   1 -16   0    1.42    0.26
   1 -16   0    1.68    0.31
  -1 -16   0    1.20    0.54
  -1 -16   0    1.33    0.25
   1 -16   0    1.11    0.18
   1 -16   0    1.20    0.37
   1 -16   0    1.23    0.16
  -1 -16   0    1.30    0.24
  -1 -16   0    1.23    0.29
   1 -16   0    1.68    0.37
  -1 -16   0    1.08    0.34
  -1  16  -1    9.89    0.57
   1  16   1    9.23    0.44
   1  16   1    9.43    0.58
  -1  16  -1   10.26    0.64
   1  16   1   10.08    0.76
   1  16   1   10.22    0.67
  -1  16  -1   10.45    0.65
  -1  16  -1   10.67    0.52
  -1 -16  -1    9.93    0.79
   1 -16   1   10.07    0.49
  -1 -16  -1    9.88    0.70
  -1 -16  -1    9.36    0.53
  -1 -16  -1    9.37    0.55
  -1 -16  -1    9.67    0.48
   1 -16   1   10.07    0.65
  -1 -16  -1    9.45    0.68
  -1 -16  -1    9.74    0.52
   1 -16   1    9.59    0.66
   1 -16   1   10.58    0.55
   1  16   2   20.17    1.14
   1  16   2   18.07    0.93
   1  16   2   20.13    0.76
  -1  16  -2   19.96    0.91
  -1  16  -2   19.73    0.87
  -1  16  -2   19.85    0.86
  -1  16  -2   20.97    0.96
  -1  16  -2   20.57    0.89
  -1 -16  -2   20.60    1.07
  -1 -16  -2   21.13    0.79
  -1 -16  -2   19.81    0.77
  -1 -16  -2   20.57    0.87
   1 -16   2   20.68    0.92
   1 -16   2   19.36    0.85
   1 -16   2   19.97    0.87
  -1 -16  -2   20.86    1.16
  -1 -16  -2   19.09    1.00
  -1 -16  -2   19.89    0.92
   1  16   3    0.42    0.57
  -1  16  -3    0.64    0.26
  -1  16  -3    0.42    0.23
   1  16   3    0.67    0.21
   1  16   3    0.44    0.37
  -1  16  -3    1.10    0.36
   1  16   3    0.96    0.30
  -1  16  -3    0.45    0.28
   1  16   3    0.86    0.28
   1 -16   3    0.84    0.36
  -1 -16  -3    0.68    0.20
  -1 -16  -3    0.74    0.29
  -1 -16  -3    0.52    0.22
  -1 -16  -3    0.17    0.26
  -1 -16  -3    1.12    0.52
   1 -16   3    0.49    0.28
   1  16   4    0.02    0.32
  -1  16  -4    0.04    0.38
  -1  16  -4    0.35    0.27
   1  16   4    0.40    0.24
  -1  16  -4    0.09    0.31
  -1  16  -4    0.18    0.27
   1  16   4    0.33    0.68
   1  16   4    0.19    0.23
  -1  16  -4    0.83    0.36
   1  16   4    0.14    0.45
  -1 -16  -4    0.02    0.24
  -1 -16  -4   -0.08    0.17
   1 -16   4    0.15    0.41
  -1 -16  -4    0.16    0.31
  -1 -16  -4    0.09    0.29
   1 -16   4    0.14    0.29
  -1 -16  -4   -0.50    0.46
  -1  16  -5    6.89    0.71
  -1  16  -5    8.33    0.89
   1  16   5    5.89    0.57
   1  16   5    6.84    0.75
  -1  16  -5    6.25    0.75
   1  16   5    6.57    0.89
  -1  16  -5    6.35    0.52
   1  16   5    6.60    0.62
   1  16   5    6.14    1.47
  -1 -16  -5    8.12    1.04
  -1 -16  -5    6.73    0.71
   1 -16   5    7.66    0.85
  -1 -16  -5    6.72    0.64
  -1 -16  -5    6.40    0.55
   1 -16   5    6.63    0.78
  -1  16  -6   42.33    1.96
  -1  16  -6   46.10    1.80
  -1  16  -6   48.95    2.04
   1  16   6   46.34    1.81
   1  16   6   47.36    1.90
   1  16   6   42.09    1.71
  -1 -16  -6   43.91    1.61
  -1 -16  -6   47.89    1.84
  -1 -16  -6   47.80    2.28
  -1 -16  -6   41.66    2.07
   1 -16   6   45.39    1.95
   1  16   7    1.86    0.53
   1  16   7   -0.07    1.28
   1  16   7    1.43    0.50
  -1  16  -7   -0.17    0.51
  -1  16  -7    2.13    0.72
  -1 -16  -7    2.50    0.55
   1 -16   7    1.73    0.60
  -1 -16  -7    1.01    0.50
   1 -16   7    0.19    0.62
  -1 -16  -7    1.05    0.39
   1  16   8    4.40    0.81
   1  16   8    6.69    1.11
  -1  16  -8    6.43    1.02
  -1 -16  -8    5.11    0.79
  -1 -16  -8    6.18    0.95
   1 -16   8    4.64    0.90
  -1 -16  -8    6.90    0.78
   1 -16   8    7.10    1.02
   1  16   9    8.01    1.29
   1  16   9    7.06    1.09
  -1  16  -9    8.99    1.33
  -1 -16  -9   10.89    1.27
   1 -16   9    7.46    1.16
  -1 -16  -9    6.42    0.95
   1  16  10   11.35    1.67
  -1  16 -10    9.52    1.64
  -1 -16 -10    8.36    1.34
   1 -16  10    6.53    1.34
  -1 -16 -10   10.62    1.53
  -1  17  10    1.91    0.96
   1  17 -10    1.10    1.15
  -1 -17  10    3.09    1.18
   1 -17 -10    2.97    0.91
  -1  17   9   -0.42    0.72
   1  17  -9   -0.21    0.88
   1 -17  -9   -0.43    0.66
  -1 -17   9   -0.19    0.90
  -1  17   8    9.18    1.14
   1  17  -8    9.55    1.42
   1 -17  -8    9.47    0.80
  -1 -17   8    8.19    1.35
  -1 -17   8    8.43    1.25
   1 -17  -8    8.88    0.99
   1  17  -7    2.39    0.71
  -1  17   7    1.41    1.21
  -1  17   7    3.62    0.56
  -1  17   7    2.43    0.66
  -1  17   7    3.37    0.59
  -1 -17   7    4.80    0.83
  -1 -17   7    2.65    0.78
   1 -17  -7    3.64    0.62
   1 -17  -7    2.96    0.43
   1  17  -6    1.94    0.58
  -1  17   6    1.53    0.92
  -1  17   6    2.96    0.60
   1  17  -6    1.49    0.80
   1  17  -6    1.35    0.55
  -1  17   6    1.96    0.45
  -1  17   6    2.13    0.40
   1 -17  -6    2.19    0.63
   1 -17  -6    2.64    0.40
   1 -17  -6    1.86    0.52
   1 -17  -6    2.66    0.45
  -1 -17   6    1.63    0.62
  -1 -17   6    2.06    0.67
   1 -17  -6    1.37    0.85
   1  17  -5   -0.36    0.39
  -1  17   5   -0.12    0.23
   1  17  -5   -0.09    0.39
  -1  17   5    0.34    0.30
  -1  17   5   -0.16    0.39
   1  17  -5    0.00    0.44
  -1  17   5   -0.13    0.61
   1 -17  -5    0.13    0.29
  -1 -17   5    0.17    0.48
   1 -17  -5   -0.83    0.58
   1 -17  -5    0.18    0.37
   1 -17  -5    0.25    0.19
   1 -17  -5   -0.05    0.36
   1 -17  -5   -0.27    0.43
   1  17  -4    4.08    0.37
  -1  17   4    4.44    0.37
  -1  17   4    4.60    0.61
  -1  17   4    3.75    1.00
   1  17  -4    3.47    0.60
   1  17  -4    4.94    0.71
  -1  17   4    3.92    0.39
   1  17  -4    4.09    0.47
   1  17  -4    4.41    0.67
   1 -17  -4    3.59    0.40
   1 -17  -4    4.61    0.79
   1 -17  -4    3.49    0.60
  -1 -17   4    4.41    0.65
   1 -17  -4    4.82    0.81
   1 -17  -4    3.50    0.28
  -1 -17   4    3.96    0.66
   1 -17  -4    4.29    0.74
   1 -17  -4    4.39    0.58
  -1  17   3   22.43    0.83
   1  17  -3   25.31    1.12
  -1  17   3   24.69    0.84
   1  17  -3   23.13    0.97
   1  17  -3   25.09    0.96
   1  17  -3   24.05    1.15
   1  17  -3   24.95    1.16
   1 -17  -3   22.76    1.14
   1 -17  -3   23.58    1.25
   1 -17  -3   23.44    1.15
   1 -17  -3   23.24    1.33
  -1 -17   3   23.01    1.13
   1 -17  -3   24.15    1.07
  -1 -17   3   24.97    1.23
   1  17  -2    5.80    0.54
   1  17  -2    5.84    0.58
   1  17  -2    6.62    0.63
   1  17  -2    6.53    0.45
   1  17  -2    7.04    0.55
   1 -17  -2    4.81    0.57
   1 -17  -2    5.62    0.67
   1 -17  -2    5.88    0.74
   1 -17  -2    4.86    0.57
   1 -17  -2    6.54    0.53
  -1 -17   2    5.72    0.58
  -1 -17   2    6.33    0.62
   1  17  -1    6.32    0.47
   1  17  -1    5.93    0.45
   1  17  -1    5.92    0.51
   1  17  -1    5.60    0.58
   1  17  -1    5.72    0.58
  -1  17   1    5.29    0.53
   1 -17  -1    5.76    0.68
   1 -17  -1    5.63    0.58
   1 -17  -1    7.42    1.05
   1 -17  -1    5.56    0.61
   1 -17  -1    6.17    0.49
  -1 -17   1    6.22    0.50
  -1 -17   1    5.86    0.53
   1 -17  -1    5.81    0.51
  -1 -17   1    5.55    0.51
   1  17   0    2.40    0.40
  -1  17   0    3.06    0.46
  -1  17   0    2.69    0.22
   1  17   0    2.31    0.35
  -1  17   0    2.58    0.40
   1  17   0    2.77    0.48
  -1  17   0    2.35    0.25
   1  17   0    2.29    0.29
   1  17   0    2.42    0.33
  -1 -17   0    2.43    0.35
   1 -17   0    2.23    0.44
   1 -17   0    2.23    0.38
  -1 -17   0    1.50    0.38
  -1 -17   0    2.12    0.33
  -1 -17   0    2.23    0.31
   1 -17   0    2.08    0.20
   1 -17   0    2.31    0.35
   1 -17   0    2.37    0.20
   1 -17   0    2.95    0.46
  -1 -17   0    2.59    0.77
   1 -17   0    2.53    0.46
  -1 -17   0    2.92    0.36
  -1 -17   0    2.13    0.36
  -1  17  -1   41.97    1.57
  -1  17  -1   41.99    1.57
  -1  17  -1   42.39    1.39
   1  17   1   40.60    1.33
   1  17   1   41.83    1.71
  -1  17  -1   41.05    1.47
   1  17   1   42.41    1.61
  -1 -17  -1   41.79    1.60
  -1 -17  -1   43.22    2.36
  -1 -17  -1   39.78    1.39
  -1 -17  -1   40.77    1.61
   1 -17   1   41.01    1.59
  -1 -17  -1   41.67    1.36
  -1 -17  -1   40.18    1.44
  -1 -17  -1   42.02    1.73
   1 -17   1   42.58    1.41
   1 -17   1   41.40    1.37
   1 -17   1   43.46    1.57
  -1  17  -2    0.31    0.29
  -1  17  -2    0.30    0.23
  -1  17  -2    0.34    0.26
   1  17   2    0.17    0.26
   1  17   2    0.29    0.39
  -1  17  -2    0.18    0.23
   1  17   2    0.24    0.15
  -1  17  -2    0.45    0.24
  -1 -17  -2    0.98    0.98
  -1 -17  -2    0.19    0.38
  -1 -17  -2    0.60    0.45
  -1 -17  -2    0.14    0.19
  -1 -17  -2    0.05    0.33
   1 -17   2    0.37    0.29
   1 -17   2    0.48    0.30
   1 -17   2   -0.05    0.21
  -1 -17  -2    0.75    0.20
  -1 -17  -2    0.55    0.31
  -1 -17  -2    0.43    0.33
   1  17   3    3.73    0.67
   1  17   3    3.05    0.80
   1  17   3    3.24    0.37
  -1  17  -3    2.92    0.39
  -1  17  -3    3.36    0.49
   1  17   3    3.56    0.44
  -1  17  -3    3.54    0.55
   1  17   3    2.82    0.46
  -1  17  -3    3.46    0.50
  -1  17  -3    2.74    0.43
  -1 -17  -3    3.47    0.48
  -1 -17  -3    3.28    0.38
  -1 -17  -3    3.19    0.64
   1 -17   3    3.97    0.60
  -1 -17  -3    3.09    0.53
  -1 -17  -3    3.03    0.56
  -1 -17  -3    3.24    0.36
   1 -17   3    3.13    0.47
  -1  17  -4   22.20    0.99
   1  17   4   20.61    1.31
  -1  17  -4   23.22    1.18
  -1  17  -4   20.44    1.06
   1  17   4   19.64    0.93
   1  17   4   20.80    0.92
  -1  17  -4   20.29    0.92
   1  17   4   18.06    1.68
  -1  17  -4   20.20    1.06
   1  17   4   21.51    1.04
   1 -17   4   21.23    1.14
  -1 -17  -4   21.96    1.05
  -1 -17  -4   20.09    1.12
  -1 -17  -4   21.32    0.84
   1 -17   4   20.38    1.07
  -1 -17  -4   21.01    1.35
  -1 -17  -4   21.18    1.25
  -1  17  -5    9.32    0.61
   1  17   5    8.90    0.81
  -1  17  -5    8.74    0.93
   1  17   5    9.31    0.98
   1  17   5    7.99    1.53
   1  17   5   10.29    0.68
  -1  17  -5    8.76    0.82
  -1  17  -5    8.76    0.79
   1  17   5   10.04    0.71
  -1 -17  -5    9.58    0.57
  -1 -17  -5   10.09    0.85
  -1 -17  -5   10.33    1.11
   1 -17   5    9.13    0.85
   1 -17   5    8.67    0.90
  -1 -17  -5    9.74    0.74
  -1  17  -6   10.67    1.04
  -1  17  -6   15.61    0.75
   1  17   6   12.59    1.21
  -1  17  -6   15.18    1.19
   1  17   6   12.12    0.84
  -1  17  -6   13.37    0.99
   1  17   6   13.93    1.01
   1  17   6   13.76    0.93
  -1 -17  -6   12.92    0.74
  -1 -17  -6   13.84    0.92
  -1 -17  -6   13.19    1.00
   1 -17   6   13.31    1.09
   1 -17   6   13.33    1.13
  -1 -17  -6   12.68    1.37
  -1  17  -7    0.06    0.61
  -1  17  -7   -0.72    0.49
   1  17   7    0.24    0.48
   1  17   7   -0.31    0.49
   1 -17   7    1.01    0.60
  -1 -17  -7    0.08    0.45
  -1 -17  -7    0.38    0.43
  -1 -17  -7   -0.09    0.34
   1 -17   7    0.39    0.58
   1  17   8    4.09    0.79
  -1  17  -8    3.17    0.78
   1  17   8    6.60    1.10
  -1  17  -8    4.83    1.02
  -1 -17  -8    4.72    0.77
  -1 -17  -8    4.80    0.81
  -1 -17  -8    4.92    0.64
   1 -17   8    4.92    0.95
   1  17   9    0.60    0.84
  -1  17  -9   -0.67    0.97
   1  17   9    1.53    0.83
  -1 -17  -9    1.96    0.75
  -1 -17  -9    0.06    0.63
   1 -17   9   -0.50    0.81
   1  17  10    0.84    0.94
  -1  17 -10   -1.11    1.25
  -1 -17 -10    1.86    0.88
  -1 -17 -10    0.78    0.93
  -1  18   9    5.04    0.97
   1  18  -9    5.74    1.19
  -1 -18   9    5.03    1.18
   1 -18  -9    5.94    0.88
  -1  18   8    1.00    0.67
  -1  18   8    0.44    0.59
  -1 -18   8   -0.93    0.76
   1 -18  -8    0.88    0.53
   1 -18  -8    0.13    0.49
  -1 -18   8   -0.73    0.91
  -1  18   7    3.96    1.23
   1  18  -7    5.34    0.85
  -1  18   7    5.16    0.77
  -1  18   7    3.73    0.50
  -1  18   7    4.09    0.63
   1 -18  -7    3.13    0.57
   1 -18  -7    3.13    0.54
  -1 -18   7    4.53    0.89
  -1 -18   7    3.85    0.85
   1  18  -6    0.00    0.55
  -1  18   6    0.72    0.46
   1  18  -6    0.01    0.49
  -1  18   6    1.02    0.95
  -1  18   6    1.17    0.41
  -1  18   6    0.73    0.31
   1 -18  -6    1.61    0.39
  -1 -18   6   -0.65    0.53
   1 -18  -6    0.67    0.42
  -1 -18   6    0.70    0.56
   1  18  -5    3.17    0.64
  -1  18   5    3.70    0.64
   1  18  -5    4.01    0.64
   1  18  -5    3.34    0.49
  -1  18   5    4.43    1.02
   1  18  -5    4.82    0.68
  -1  18   5    3.66    0.44
  -1 -18   5    5.02    0.83
   1 -18  -5    3.52    0.65
   1 -18  -5    3.95    0.70
   1 -18  -5    3.46    0.57
   1 -18  -5    4.51    0.48
   1 -18  -5    4.36    0.35
   1  18  -4   38.06    1.60
   1  18  -4   37.74    1.27
  -1  18   4   37.41    1.29
   1  18  -4   38.77    1.59
  -1  18   4   36.99    1.51
   1  18  -4   36.91    1.61
  -1  18   4   37.41    1.27
  -1  18   4   35.45    2.08
   1  18  -4   37.36    1.36
   1 -18  -4   37.28    1.62
   1 -18  -4   37.00    1.66
   1 -18  -4   35.73    1.49
   1 -18  -4   36.53    1.18
  -1 -18   4   37.83    1.69
   1 -18  -4   38.44    1.76
  -1 -18   4   35.51    1.59
   1 -18  -4   38.25    1.25
   1 -18  -4   37.57    1.83
  -1  18   3   20.60    0.73
   1  18  -3   18.86    1.04
   1  18  -3   19.07    0.88
   1  18  -3   19.98    1.01
   1  18  -3   19.77    0.86
   1  18  -3   19.37    1.06
  -1  18   3   19.92    0.71
  -1 -18   3   18.04    1.01
   1 -18  -3   19.81    1.18
   1 -18  -3   20.37    1.26
  -1 -18   3   19.05    1.08
   1 -18  -3   20.10    1.07
   1 -18  -3   19.59    0.96
   1 -18  -3   20.56    1.07
   1  18  -2    4.84    0.55
   1  18  -2    5.76    0.54
   1  18  -2    5.77    0.45
   1  18  -2    5.95    0.63
   1  18  -2    5.64    0.60
  -1 -18   2    4.46    0.59
   1 -18  -2    4.35    0.66
  -1 -18   2    4.49    0.55
   1 -18  -2    4.46    0.75
   1 -18  -2    4.80    0.59
   1 -18  -2    4.76    0.61
   1 -18  -2    5.38    0.51
   1  18  -1    2.56    0.37
   1  18  -1    3.02    0.49
   1  18  -1    2.97    0.39
   1  18  -1    3.92    0.47
   1  18  -1    3.21    0.53
  -1  18   1    3.32    0.51
  -1 -18   1    3.14    0.46
   1 -18  -1    4.15    0.60
  -1 -18   1    2.72    0.46
   1 -18  -1    2.70    0.49
  -1 -18   1    2.95    0.33
  -1 -18   1    2.90    0.41
   1 -18  -1    3.37    0.45
   1 -18  -1    3.37    0.56
   1 -18  -1    3.19    0.84
   1 -18  -1    3.31    0.57
  -1  18   0   21.46    0.72
   1  18   0   21.99    0.95
   1  18   0   22.15    0.94
  -1  18   0   22.55    1.04
  -1  18   0   22.11    0.97
   1  18   0   22.09    1.08
   1  18   0   21.67    0.82
   1  18   0   22.28    1.13
  -1  18   0   21.55    0.76
   1 -18   0   20.28    1.11
   1 -18   0   22.62    1.09
   1 -18   0   20.74    0.71
   1 -18   0   21.03    1.50
   1 -18   0   21.46    0.70
  -1 -18   0   22.20    1.00
   1 -18   0   20.17    1.13
  -1 -18   0   21.71    0.86
   1 -18   0   21.34    0.94
   1 -18   0   23.93    1.04
  -1 -18   0   21.48    1.09
  -1 -18   0   21.06    1.60
  -1 -18   0   21.75    0.87
   1  18   1   63.61    1.96
   1  18   1   65.15    2.39
  -1  18  -1   64.44    2.12
   1  18   1   62.66    2.08
  -1  18  -1   68.09    2.24
  -1  18  -1   66.13    2.22
   1  18   1   64.06    2.27
  -1 -18  -1   62.64    2.08
  -1 -18  -1   64.44    1.99
  -1 -18  -1   60.23    2.02
  -1 -18  -1   55.19    2.97
   1 -18   1   67.46    2.23
   1 -18   1   67.20    2.04
  -1 -18  -1   67.99    2.41
   1 -18   1   63.74    2.24
   1 -18   1   64.06    2.00
  -1 -18  -1   65.32    2.08
  -1 -18  -1   60.99    2.27
  -1 -18  -1   65.60    2.26
   1  18   2   46.08    1.49
   1  18   2   46.10    1.93
  -1  18  -2   45.83    1.63
  -1  18  -2   46.25    1.67
  -1  18  -2   44.29    1.60
  -1  18  -2   47.64    1.73
   1  18   2   45.28    1.60
  -1  18  -2   46.66    1.61
  -1 -18  -2   47.83    1.62
  -1 -18  -2   46.26    1.67
   1 -18   2   46.91    1.65
  -1 -18  -2   46.84    1.96
   1 -18   2   45.20    1.63
   1 -18   2   44.95    1.59
  -1 -18  -2   46.20    1.79
  -1 -18  -2   45.83    1.82
  -1 -18  -2   44.23    1.51
  -1 -18  -2   47.44    1.52
   1  18   3    7.46    0.57
   1  18   3    7.76    0.49
  -1  18  -3    8.33    0.61
   1  18   3    8.16    0.62
  -1  18  -3    8.85    0.66
  -1  18  -3    9.35    0.63
  -1  18  -3    7.74    0.66
  -1  18  -3    7.93    0.67
   1  18   3    8.30    0.89
   1 -18   3    8.25    0.73
  -1 -18  -3    7.63    0.48
  -1 -18  -3    8.50    0.98
  -1 -18  -3    7.56    0.73
   1 -18   3    8.06    0.63
  -1 -18  -3    7.85    0.52
  -1 -18  -3    9.03    0.64
  -1 -18  -3    8.86    0.89
  -1  18  -4   14.71    0.83
  -1  18  -4   14.15    0.90
  -1  18  -4   15.48    0.80
   1  18   4   15.83    1.61
  -1  18  -4   16.67    0.94
   1  18   4   15.09    0.82
   1  18   4   14.82    0.76
   1  18   4   14.97    0.88
   1  18   4   14.71    1.13
   1 -18   4   14.27    0.91
  -1 -18  -4   14.80    0.69
   1 -18   4   14.67    1.02
  -1 -18  -4   15.73    0.99
  -1 -18  -4   14.34    1.25
  -1 -18  -4   15.27    0.92
  -1 -18  -4   14.59    1.15
  -1 -18  -4   17.15    0.81
   1  18   5    0.39    0.32
   1  18   5    0.77    0.45
  -1  18  -5    0.54    0.44
   1  18   5    1.26    0.85
  -1  18  -5    0.82    0.28
   1  18   5    0.12    0.76
  -1  18  -5    1.37    0.48
  -1  18  -5    1.20    0.36
  -1  18  -5    1.47    0.44
  -1 -18  -5    1.03    0.25
   1 -18   5    1.69    0.54
   1 -18   5    0.27    0.43
  -1 -18  -5    0.44    0.63
  -1 -18  -5    0.95    0.61
  -1 -18  -5    0.75    0.40
  -1 -18  -5    1.14    0.38
  -1 -18  -5    1.03    0.44
   1  18   6   -0.30    0.95
   1  18   6    1.07    0.64
  -1  18  -6   -0.19    0.52
   1  18   6    0.13    0.46
  -1  18  -6    0.66    0.30
   1  18   6    0.57    0.42
   1  18   6    0.46    0.37
  -1  18  -6    0.53    0.47
   1 -18   6    1.38    0.58
  -1 -18  -6    0.04    0.37
   1 -18   6   -0.14    0.49
  -1 -18  -6    0.55    0.48
  -1 -18  -6    0.36    0.29
  -1  18  -7    7.23    0.63
  -1  18  -7    5.88    0.97
   1  18   7    7.16    0.98
   1  18   7    7.47    0.88
  -1  18  -7    6.03    1.33
  -1 -18  -7    7.42    0.68
  -1 -18  -7    8.07    1.01
  -1 -18  -7    6.60    0.90
   1 -18   7    6.86    1.14
   1 -18   7    5.77    0.87
  -1  18  -8   -0.82    0.87
   1  18   8    0.34    0.60
   1  18   8    1.22    0.70
   1 -18   8    0.28    0.85
   1 -18   8    0.29    0.76
  -1 -18  -8    1.51    0.62
  -1 -18  -8    0.01    0.58
  -1  18  -9    9.32    1.43
   1  18   9   10.60    1.39
  -1 -18  -9    9.25    1.25
   1 -18   9   10.63    1.58
   1  19  -9    9.23    1.37
  -1  19   9    9.01    1.30
  -1 -19   9    8.74    1.52
   1 -19  -9    8.01    1.14
   1 -19  -9    7.00    1.17
  -1  19   8    3.18    0.81
  -1  19   8    0.92    0.74
   1 -19  -8    2.04    0.64
  -1 -19   8    2.19    0.82
   1 -19  -8    2.30    0.72
  -1 -19   8    2.49    1.13
  -1  19   7    0.08    0.51
   1  19  -7    0.12    0.66
   1 -19  -7   -0.53    0.30
   1 -19  -7   -0.47    0.50
   1 -19  -7   -0.36    0.48
  -1 -19   7    0.05    0.79
  -1 -19   7    0.45    0.67
   1  19  -6    0.61    0.36
  -1  19   6    0.50    0.38
  -1  19   6    1.74    0.77
  -1  19   6    0.19    0.30
  -1  19   6    0.69    0.94
   1  19  -6    1.31    0.56
   1  19  -6    0.81    0.58
  -1 -19   6    1.00    0.63
   1 -19  -6    0.77    0.46
  -1 -19   6    0.94    0.63
   1 -19  -6    0.53    0.25
   1 -19  -6    0.27    0.36
   1  19  -5    2.23    0.39
   1  19  -5    1.82    0.54
  -1  19   5    2.26    0.50
  -1  19   5    2.46    0.34
   1  19  -5    2.19    0.55
   1  19  -5    3.15    0.60
  -1  19   5    3.37    1.01
  -1 -19   5    2.32    0.72
   1 -19  -5    2.43    0.38
   1 -19  -5    1.84    0.31
   1 -19  -5    2.58    0.62
   1 -19  -5    2.92    0.52
   1 -19  -5    2.69    0.92
   1 -19  -5    2.70    0.54
  -1  19   4   38.08    1.32
  -1  19   4   41.12    1.58
   1  19  -4   39.72    1.65
   1  19  -4   37.68    1.34
   1  19  -4   41.04    1.66
  -1  19   4   37.21    1.38
   1  19  -4   38.59    1.68
   1  19  -4   37.26    1.41
   1 -19  -4   37.02    1.65
   1 -19  -4   37.18    1.77
   1 -19  -4   39.46    1.56
  -1 -19   4   37.52    1.66
   1 -19  -4   37.47    1.71
   1 -19  -4   40.78    1.93
   1 -19  -4   37.51    1.25
  -1 -19   4   40.67    1.74
   1  19  -3    3.52    0.59
   1  19  -3    3.40    0.49
   1  19  -3    3.84    0.45
  -1  19   3    3.14    0.33
   1  19  -3    3.39    0.55
   1  19  -3    3.35    0.52
  -1 -19   3    3.36    0.56
   1 -19  -3    3.74    0.75
   1 -19  -3    3.71    0.56
  -1 -19   3    4.00    0.63
   1 -19  -3    3.17    0.45
   1 -19  -3    2.08    0.47
   1 -19  -3    3.86    0.60
   1  19  -2   15.45    0.75
   1  19  -2   16.01    0.96
   1  19  -2   17.13    0.83
   1  19  -2   14.46    0.88
   1  19  -2   15.52    0.86
   1 -19  -2   16.09    1.11
   1 -19  -2   14.03    0.97
   1 -19  -2   15.42    0.83
   1 -19  -2   14.88    0.93
  -1 -19   2   16.56    0.92
   1 -19  -2   14.11    0.89
  -1 -19   2   15.78    0.87
   1  19  -1    3.70    0.59
  -1  19   1    2.84    0.43
   1  19  -1    3.66    0.53
   1  19  -1    3.54    0.42
   1  19  -1    3.20    0.52
   1  19  -1    2.85    0.39
   1 -19  -1    4.08    0.55
   1 -19  -1    3.17    0.57
   1 -19  -1    2.77    0.59
   1 -19  -1    3.81    0.62
   1 -19  -1    2.95    0.87
   1 -19  -1    3.85    0.51
  -1 -19   1    3.17    0.48
  -1 -19   1    3.85    0.48
  -1 -19   1    2.88    0.37
  -1 -19   1    3.73    0.50
  -1  19   0    7.69    0.60
   1  19   0    7.01    0.44
   1  19   0    7.36    0.69
  -1  19   0    8.40    0.70
   1  19   0    6.92    0.71
   1  19   0    6.57    0.57
   1  19   0    7.17    0.59
  -1  19   0    8.13    0.40
  -1  19   0    7.53    0.35
   1 -19   0    9.91    0.71
  -1 -19   0    6.51    0.49
  -1 -19   0    7.21    0.56
   1 -19   0    8.21    0.57
   1 -19   0    9.23    1.13
  -1 -19   0    7.00    0.72
  -1 -19   0    7.13    0.54
   1 -19   0    9.74    0.76
  -1 -19   0    7.54    1.19
  -1 -19   0    8.06    0.49
   1  19   1   20.04    1.15
   1  19   1   19.70    0.89
   1  19   1   21.30    1.06
  -1  19  -1   19.14    1.02
  -1  19  -1   20.12    1.02
   1  19   1   18.67    0.73
  -1  19  -1   19.32    0.81
  -1  19  -1   19.43    0.92
  -1 -19  -1   20.71    0.78
  -1 -19  -1   20.43    1.21
  -1 -19  -1   21.39    1.07
  -1 -19  -1   20.62    0.88
  -1 -19  -1   19.85    0.90
   1 -19   1   18.84    1.04
  -1 -19  -1   18.68    0.82
   1 -19   1   20.63    1.04
   1 -19   1   19.02    0.82
   1 -19   1   19.78    0.79
  -1 -19  -1   19.39    1.80
  -1 -19  -1   20.15    1.11
  -1  19  -2   45.46    1.64
  -1  19  -2   44.39    1.54
  -1  19  -2   44.21    1.58
  -1  19  -2   42.99    1.55
   1  19   2   43.47    1.54
  -1  19  -2   44.63    1.70
   1  19   2   43.76    1.90
   1 -19   2   43.53    1.54
  -1 -19  -2   43.08    1.91
  -1 -19  -2   42.03    1.75
  -1 -19  -2   43.00    1.45
  -1 -19  -2   43.32    1.62
   1 -19   2   45.36    1.61
  -1 -19  -2   43.16    1.56
  -1 -19  -2   41.71    1.46
  -1 -19  -2   44.56    1.79
  -1  19  -3    2.88    0.43
   1  19   3    2.73    0.35
   1  19   3    3.09    0.49
  -1  19  -3    3.46    0.49
  -1  19  -3    3.70    0.55
   1  19   3    3.87    0.78
  -1  19  -3    3.17    0.50
  -1  19  -3    3.79    0.55
   1 -19   3    3.46    0.53
  -1 -19  -3    3.87    0.54
  -1 -19  -3    2.95    0.39
  -1 -19  -3    2.77    0.56
  -1 -19  -3    2.30    0.36
  -1 -19  -3    2.53    0.51
   1 -19   3    3.51    0.53
  -1 -19  -3    3.29    0.74
  -1  19  -4    1.43    0.32
  -1  19  -4    1.20    0.39
   1  19   4    2.03    0.85
  -1  19  -4    0.98    0.43
  -1  19  -4    0.93    0.34
  -1  19  -4    1.11    0.42
   1  19   4    1.59    0.58
   1  19   4    0.94    0.38
   1  19   4    0.62    0.28
   1  19   4    0.97    0.35
  -1 -19  -4    0.15    0.52
   1 -19   4    0.88    0.42
  -1 -19  -4    0.84    0.25
  -1 -19  -4    1.61    0.34
  -1 -19  -4    0.66    0.39
  -1 -19  -4    1.13    0.68
  -1 -19  -4    0.75    0.38
   1 -19   4    1.05    0.46
  -1  19  -5    1.13    0.35
   1  19   5    1.09    0.44
   1  19   5    0.69    0.37
   1  19   5    1.74    0.96
  -1  19  -5    1.15    0.49
  -1  19  -5    1.03    0.32
   1  19   5    0.29    0.42
   1  19   5    0.39    0.61
  -1  19  -5    1.13    0.47
  -1 -19  -5    0.79    0.46
  -1 -19  -5    0.38    0.58
  -1 -19  -5    1.21    0.43
  -1 -19  -5    1.00    0.26
   1 -19   5    0.91    0.51
   1 -19   5    0.64    0.48
  -1 -19  -5    0.95    0.38
   1  19   6    9.18    0.84
   1  19   6   10.23    0.94
  -1  19  -6    8.49    0.65
  -1  19  -6    8.91    0.89
   1  19   6    9.41    0.83
  -1 -19  -6    9.23    0.85
  -1 -19  -6    9.19    0.94
  -1 -19  -6    9.38    0.72
   1 -19   6   10.70    1.10
   1 -19   6    7.72    1.01
  -1  19  -7   10.05    1.13
   1  19   7    7.30    1.02
   1  19   7    9.70    0.93
  -1  19  -7    7.80    0.72
  -1  19  -7    7.97    1.12
  -1 -19  -7   11.09    0.93
   1 -19   7   10.05    1.23
  -1 -19  -7    9.09    1.02
  -1 -19  -7    7.78    0.73
   1 -19   7    9.42    1.25
   1  19   8   12.81    1.27
  -1  19  -8   12.88    0.84
   1 -19   8   11.00    1.43
   1 -19   8   12.11    1.58
  -1 -19  -8   11.32    1.19
  -1 -19  -8    9.56    1.47
   1  19   9    5.39    1.10
   1 -19   9    5.34    1.21
  -1 -19  -9    5.80    0.98
  -1  20   9   -0.23    0.82
   1  20  -9    2.22    1.05
  -1 -20   9   -1.28    0.91
   1 -20  -9   -0.22    0.74
   1 -20  -9    0.54    0.80
  -1  20   8    4.85    0.89
   1  20  -8    4.49    1.42
  -1 -20   8    9.21    1.41
   1 -20  -8    6.68    1.09
  -1 -20   8    5.08    1.19
   1 -20  -8    6.16    0.96
  -1  20   7    1.69    0.60
   1  20  -7    2.96    0.82
  -1  20   7    1.20    0.53
  -1  20   7    0.92    0.49
   1 -20  -7    1.32    0.65
  -1 -20   7    3.21    1.01
   1 -20  -7    1.46    0.35
  -1 -20   7    1.07    0.78
  -1  20   6    4.72    0.80
  -1  20   6    3.44    0.58
   1  20  -6    4.08    0.74
   1  20  -6    3.56    0.51
  -1  20   6    3.68    0.52
  -1 -20   6    3.80    0.84
  -1 -20   6    4.88    0.86
   1 -20  -6    4.00    0.59
   1 -20  -6    3.85    0.68
   1 -20  -6    3.83    0.43
   1  20  -5    0.55    0.49
   1  20  -5    1.35    0.51
  -1  20   5    0.67    0.42
   1  20  -5    1.95    1.05
   1  20  -5    0.48    0.32
  -1  20   5    1.32    0.34
  -1  20   5    0.45    0.28
  -1  20   5    1.34    0.83
   1 -20  -5    0.90    0.85
   1 -20  -5    0.18    0.41
   1 -20  -5    0.63    0.28
  -1 -20   5    0.43    0.49
   1 -20  -5    0.47    0.21
   1 -20  -5    1.30    0.74
   1 -20  -5    0.33    0.43
  -1 -20   5    0.08    0.87
   1  20  -4   31.90    1.23
   1  20  -4   32.13    1.45
   1  20  -4   30.73    1.48
  -1  20   4   31.14    1.10
   1  20  -4   32.81    1.50
  -1  20   4   30.21    1.09
   1 -20  -4   29.26    1.64
   1 -20  -4   29.33    1.72
   1 -20  -4   30.05    1.36
   1 -20  -4   31.88    1.66
   1 -20  -4   28.45    1.50
  -1 -20   4   29.94    1.46
  -1 -20   4   34.27    1.55
   1  20  -3   48.68    1.88
   1  20  -3   51.62    1.84
   1  20  -3   48.92    1.68
   1  20  -3   49.10    1.93
   1  20  -3   47.41    1.75
  -1 -20   3   50.03    1.93
   1 -20  -3   48.00    1.90
   1 -20  -3   50.10    1.81
   1 -20  -3   47.91    2.14
   1 -20  -3   46.29    1.92
  -1 -20   3   48.00    1.88
   1 -20  -3   48.41    1.99
   1  20  -2   17.16    0.82
   1  20  -2   18.64    0.89
   1  20  -2   16.92    0.96
   1  20  -2   16.23    0.93
   1  20  -2   18.41    1.05
   1 -20  -2   18.08    0.90
   1 -20  -2   17.51    1.02
  -1 -20   2   16.51    0.93
  -1 -20   2   16.94    0.97
   1 -20  -2   16.62    0.97
   1 -20  -2   19.00    1.24
   1 -20  -2   16.27    1.10
   1  20  -1   12.57    0.65
   1  20  -1   12.74    0.78
   1  20  -1   12.32    0.87
   1  20  -1   12.68    0.70
   1  20  -1   14.19    0.91
   1 -20  -1   11.92    0.98
   1 -20  -1   12.68    0.79
  -1 -20   1   13.43    0.77
  -1 -20   1   11.60    0.62
   1 -20  -1   12.57    0.87
   1 -20  -1   14.11    0.91
   1 -20  -1   10.84    1.40
   1 -20  -1   12.86    0.77
  -1 -20   1   11.56    0.74
  -1 -20   1   13.62    0.74
   1  20   0   16.20    0.69
   1  20   0   15.61    0.82
   1  20   0   16.16    1.03
  -1  20   0   16.75    0.86
  -1  20   0   16.44    0.96
  -1  20   0   16.76    0.65
   1  20   0   16.46    0.98
  -1  20   0   16.36    0.58
   1 -20   0   17.23    0.94
   1 -20   0   16.33    1.46
   1 -20   0   18.84    1.08
  -1 -20   0   15.88    0.77
  -1 -20   0   16.87    0.74
   1 -20   0   16.17    0.83
  -1 -20   0   15.80    1.58
  -1 -20   0   14.02    0.99
  -1 -20   0   15.82    0.89
  -1 -20   0   16.18    0.79
  -1 -20   0   15.86    0.80
   1 -20   0   18.34    1.02
   1 -20   0   17.90    0.87
   1  20   1    8.92    0.63
  -1  20  -1    9.00    0.53
  -1  20  -1    9.84    0.65
   1  20   1    8.77    0.89
  -1  20  -1    8.58    0.69
  -1  20  -1   10.34    0.78
   1  20   1   10.43    0.80
   1 -20   1    8.94    0.50
  -1 -20  -1    8.93    0.56
   1 -20   1    9.47    0.81
   1 -20   1   10.53    0.56
  -1 -20  -1    8.71    0.61
  -1 -20  -1    9.71    0.93
  -1 -20  -1    9.18    0.83
  -1 -20  -1    8.34    0.81
  -1 -20  -1    8.90    0.48
  -1 -20  -1    7.90    0.63
  -1 -20  -1    7.97    1.48
   1  20   2    5.03    0.79
   1  20   2    4.46    0.55
  -1  20  -2    3.94    0.50
  -1  20  -2    4.64    0.49
  -1  20  -2    4.48    0.61
  -1  20  -2    4.55    0.60
  -1  20  -2    4.77    0.49
  -1 -20  -2    4.41    0.40
  -1 -20  -2    5.41    0.61
  -1 -20  -2    4.91    0.76
   1 -20   2    4.36    0.56
  -1 -20  -2    5.09    0.90
  -1 -20  -2    4.13    0.63
   1 -20   2    4.20    0.47
  -1 -20  -2    4.82    0.52
  -1 -20  -2    3.99    0.44
   1  20   3    7.80    0.92
  -1  20  -3    7.51    0.67
   1  20   3    7.42    0.50
  -1  20  -3    6.10    0.63
   1  20   3    6.40    0.62
  -1  20  -3    7.66    0.61
  -1  20  -3    7.54    0.66
  -1  20  -3    7.37    0.74
   1 -20   3    7.20    0.74
  -1 -20  -3    6.17    0.49
  -1 -20  -3    8.19    0.80
  -1 -20  -3    5.99    0.98
  -1 -20  -3    7.58    0.53
  -1 -20  -3    8.99    0.93
   1 -20   3    7.66    0.65
  -1 -20  -3    6.39    0.62
  -1  20  -4   10.49    0.86
   1  20   4    9.47    1.05
  -1  20  -4    8.79    0.68
  -1  20  -4    9.81    0.67
   1  20   4    9.22    0.72
  -1  20  -4    9.39    0.86
   1  20   4    9.71    0.63
  -1  20  -4    8.81    0.81
   1  20   4   10.01    0.74
   1 -20   4    9.11    0.80
  -1 -20  -4    8.57    0.75
  -1 -20  -4   10.19    1.08
  -1 -20  -4   10.96    0.68
  -1 -20  -4    9.76    1.30
  -1 -20  -4   10.19    1.09
   1 -20   4   10.09    0.90
  -1 -20  -4    9.74    0.57
   1  20   5    2.68    0.46
   1  20   5    1.96    1.07
  -1  20  -5    2.44    0.45
  -1  20  -5    4.27    0.76
   1  20   5    2.73    0.80
   1  20   5    3.04    0.55
   1  20   5    2.67    0.49
  -1  20  -5    2.65    0.40
  -1  20  -5    2.33    0.58
   1 -20   5    2.06    0.92
  -1 -20  -5    2.49    0.57
  -1 -20  -5    2.66    0.36
  -1 -20  -5    2.93    0.54
   1 -20   5    3.07    0.60
   1  20   6    0.34    0.52
  -1  20  -6    1.47    0.37
  -1  20  -6    1.74    0.58
  -1  20  -6    1.29    0.42
   1  20   6    1.27    0.47
   1  20   6    1.12    0.45
  -1 -20  -6    1.21    0.47
  -1 -20  -6    1.68    0.61
   1 -20   6    1.14    0.58
   1 -20   6    0.99    0.62
  -1 -20  -6    0.50    0.33
   1  20   7    2.46    0.67
   1  20   7    1.70    0.55
  -1  20  -7    0.50    0.38
  -1  20  -7    1.42    0.67
   1 -20   7    0.81    0.70
  -1 -20  -7    2.04    0.66
  -1 -20  -7    1.41    0.56
  -1 -20  -7    1.19    0.40
   1 -20   7    2.11    0.76
   1  20   8    0.06    0.68
  -1 -20  -8    0.16    0.66
  -1 -20  -8    1.76    0.71
   1 -20   8    0.23    0.89
   1 -20   8   -0.71    0.90
   1  20   9    1.99    0.93
  -1 -20  -9    2.51    0.89
  -1 -20  -9    1.09    0.75
   1 -20   9    5.74    1.25
  -1  21   9    0.28    0.78
   1  21  -9    2.52    1.07
   1 -21  -9    1.04    0.81
  -1 -21   9    0.54    1.03
   1  21  -8    0.21    0.93
  -1  21   8   -0.26    0.64
  -1 -21   8   -0.76    1.00
   1 -21  -8   -0.15    0.56
   1 -21  -8    0.32    0.71
  -1 -21   8   -0.24    0.92
   1  21  -7    0.78    0.40
  -1  21   7    0.50    0.55
  -1  21   7    0.66    0.63
   1  21  -7   -0.18    0.67
  -1  21   7    0.30    0.46
  -1 -21   7    1.19    0.89
  -1 -21   7    1.29    0.81
   1 -21  -7    0.80    0.32
   1 -21  -7    0.36    0.62
   1  21  -6    6.35    0.69
  -1  21   6    5.00    0.64
  -1  21   6    6.07    0.88
  -1  21   6    6.71    1.53
   1  21  -6    8.13    1.07
  -1 -21   6    5.88    0.91
   1 -21  -6    5.57    0.91
   1 -21  -6    5.25    0.46
  -1 -21   6    4.65    0.89
   1 -21  -6    6.71    0.66
  -1  21   5    3.25    0.52
  -1  21   5    3.13    0.43
   1  21  -5    3.88    0.56
  -1  21   5    4.26    0.65
   1  21  -5    3.76    0.66
   1  21  -5    2.83    0.59
   1 -21  -5    2.79    0.44
  -1 -21   5    2.91    0.67
   1 -21  -5    3.45    0.64
   1  21  -4   15.19    1.02
   1  21  -4   13.46    0.76
   1  21  -4   11.98    0.94
   1  21  -4   12.86    1.00
  -1  21   4   12.27    0.59
  -1  21   4   10.97    0.60
   1 -21  -4   11.13    0.96
  -1 -21   4   12.39    0.96
   1 -21  -4   12.19    1.29
   1 -21  -4   10.17    0.86
   1 -21  -4   11.36    1.05
  -1 -21   4   13.93    1.06
   1 -21  -4   10.90    1.12
   1  21  -3    7.87    0.79
   1  21  -3    7.36    0.64
   1  21  -3    6.02    0.70
   1  21  -3    6.65    0.53
   1  21  -3    6.06    0.78
   1 -21  -3    7.21    0.80
   1 -21  -3    5.08    0.65
  -1 -21   3    6.52    0.76
   1 -21  -3    6.35    1.02
   1 -21  -3    7.26    0.93
   1 -21  -3    5.83    0.73
  -1 -21   3    5.88    0.78
   1  21  -2    0.82    0.45
   1  21  -2    0.39    0.23
   1  21  -2    0.79    0.38
   1  21  -2    0.53    0.30
   1  21  -2   -0.18    0.32
   1 -21  -2   -0.19    0.53
   1 -21  -2   -0.19    0.39
   1 -21  -2    0.29    0.36
  -1 -21   2    0.28    0.36
   1 -21  -2    0.12    0.29
   1 -21  -2    0.23    0.43
  -1 -21   2    0.34    0.36
   1 -21  -2    0.53    0.99
   1  21  -1    0.15    0.22
   1  21  -1    0.16    0.38
   1  21  -1   -0.06    0.33
   1  21  -1   -0.20    0.23
   1  21  -1   -0.46    0.36
  -1 -21   1   -0.11    0.27
   1 -21  -1    0.08    0.75
  -1 -21   1   -0.21    0.47
  -1 -21   1   -0.14    0.25
   1 -21  -1    0.21    0.30
   1 -21  -1    0.45    0.41
   1 -21  -1    0.33    0.50
   1 -21  -1   -0.30    0.37
  -1 -21   1   -0.07    0.31
   1 -21  -1   -0.09    0.35
  -1  21   0    4.56    0.36
   1  21   0    5.14    0.70
   1  21   0    4.61    0.68
  -1  21   0    5.07    0.28
  -1  21   0    5.07    0.57
   1  21   0    5.39    0.39
   1  21   0    5.09    0.54
   1 -21   0    3.98    0.55
  -1 -21   0    3.85    0.50
   1 -21   0    4.79    0.65
   1 -21   0    5.19    0.68
   1 -21   0    5.66    1.16
  -1 -21   0    4.65    0.65
  -1 -21   0    5.04    0.51
   1 -21   0    5.04    0.58
   1 -21   0    4.66    0.72
  -1 -21   0    4.70    0.52
  -1 -21   0    6.17    1.31
  -1 -21   0    4.73    0.42
  -1 -21   0    5.03    0.72
  -1  21  -1   13.81    0.67
  -1  21  -1   15.52    0.93
   1  21   1   12.35    1.00
  -1  21  -1   14.18    0.62
   1  21   1   11.98    0.74
  -1  21  -1   15.00    0.82
  -1 -21  -1   14.98    0.97
  -1 -21  -1   12.89    0.61
  -1 -21  -1   13.58    0.75
  -1 -21  -1   10.98    1.71
  -1 -21  -1   15.13    1.02
  -1 -21  -1   13.32    0.69
  -1 -21  -1   12.68    0.78
   1 -21   1   14.02    0.63
   1 -21   1   14.32    0.99
   1 -21   1   14.24    0.67
   1 -21   1   15.76    0.96
  -1  21  -2    9.19    0.62
  -1  21  -2   10.68    0.67
  -1  21  -2   10.23    0.78
  -1  21  -2   11.03    0.81
  -1  21  -2    9.49    0.63
   1  21   2    9.26    0.96
   1  21   2    8.87    0.68
  -1 -21  -2    9.06    0.52
  -1 -21  -2    9.65    0.67
  -1 -21  -2    7.81    1.04
  -1 -21  -2    8.77    0.56
  -1 -21  -2    8.45    0.83
  -1 -21  -2    6.45    1.68
   1 -21   2    9.18    0.62
   1 -21   2    9.97    0.71
  -1 -21  -2    7.42    0.89
   1  21   3   14.43    1.15
  -1  21  -3   14.32    0.80
  -1  21  -3   13.61    0.86
  -1  21  -3   13.66    0.85
   1  21   3   15.16    0.85
  -1  21  -3   14.15    0.96
  -1  21  -3   14.71    1.05
   1 -21   3   14.48    0.94
  -1 -21  -3   15.16    1.04
   1 -21   3   13.50    0.83
  -1 -21  -3   15.66    1.18
  -1 -21  -3   14.59    0.86
  -1 -21  -3   15.00    0.72
  -1 -21  -3   13.35    0.68
  -1 -21  -3   14.47    1.27
  -1  21  -4    0.24    0.28
   1  21   4   -0.11    0.36
  -1  21  -4    0.59    0.45
   1  21   4    0.66    0.29
  -1  21  -4    0.51    0.29
   1  21   4    0.57    0.38
  -1  21  -4   -0.24    0.41
  -1  21  -4    0.03    0.38
   1  21   4    0.28    0.63
  -1 -21  -4    0.59    0.38
   1 -21   4   -0.03    0.37
  -1 -21  -4    0.32    0.24
  -1 -21  -4    0.41    0.32
  -1 -21  -4    0.45    0.55
   1 -21   4    0.42    0.47
  -1 -21  -4    0.29    0.44
  -1  21  -5   -0.03    0.33
  -1  21  -5    0.55    0.54
  -1  21  -5    0.67    0.51
  -1  21  -5    0.47    0.31
  -1  21  -5    0.61    0.50
   1  21   5    0.34    0.38
   1  21   5    0.15    0.40
   1  21   5    0.75    0.46
   1  21   5   -0.12    0.61
  -1 -21  -5    0.64    0.51
  -1 -21  -5   -0.04    0.45
   1 -21   5    0.23    0.48
   1 -21   5   -0.61    0.45
  -1 -21  -5    1.09    0.38
  -1 -21  -5    0.38    0.27
   1  21   6   15.57    1.10
  -1  21  -6   18.71    1.34
   1  21   6   16.47    1.15
  -1  21  -6   17.49    1.02
  -1  21  -6   16.72    0.91
  -1  21  -6   17.86    1.22
   1 -21   6   15.27    1.28
   1 -21   6   16.26    1.28
  -1 -21  -6   14.87    1.24
  -1 -21  -6   17.01    1.29
  -1 -21  -6   14.79    0.83
   1  21   7   -0.38    0.54
  -1  21  -7    1.07    0.47
  -1  21  -7    0.91    0.39
  -1  21  -7   -0.67    0.75
   1  21   7   -1.09    0.54
   1 -21   7   -0.14    0.66
  -1 -21  -7    0.50    0.54
  -1 -21  -7    0.08    0.53
   1 -21   7    1.27    0.72
   1  21   8    0.97    0.76
  -1  21  -8    1.90    0.94
  -1 -21  -8    1.59    0.68
   1 -21   8    1.14    0.96
  -1 -21  -8   -0.30    0.63
  -1  21  -9    0.62    1.16
   1  21   9    1.44    0.91
  -1 -21  -9   -0.22    0.78
  -1 -21  -9   -0.08    0.77
   1 -21   9   -2.31    1.21
  -1  22   8   -0.28    0.62
   1  22  -8   -1.53    0.87
   1  22  -8    0.27    0.48
  -1 -22   8    0.01    1.06
   1 -22  -8    0.72    0.58
   1 -22  -8    1.18    0.77
   1  22  -7    2.19    0.52
  -1  22   7    2.93    0.70
   1  22  -7    2.03    0.85
  -1 -22   7    1.20    0.92
  -1 -22   7    2.73    0.91
   1 -22  -7    2.38    0.75
  -1  22   6    0.38    0.41
  -1  22   6    0.86    0.93
   1  22  -6   -0.60    0.58
  -1  22   6   -0.42    0.47
  -1  22   6   -0.63    0.37
   1  22  -6    0.09    0.33
   1 -22  -6    0.01    0.53
   1 -22  -6    0.37    0.38
  -1 -22   6    1.21    0.71
   1 -22  -6   -0.07    0.26
  -1 -22   6   -1.04    0.65
   1  22  -5    0.13    0.31
   1  22  -5   -0.98    0.50
  -1  22   5   -0.08    0.31
  -1  22   5    0.52    0.31
  -1 -22   5    1.46    0.69
   1 -22  -5    0.08    0.49
  -1 -22   5    1.03    0.60
  -1  22   4   15.57    0.68
   1  22  -4   15.52    0.85
   1  22  -4   14.99    1.13
   1  22  -4   17.71    1.14
   1  22  -4   16.33    1.05
   1 -22  -4   16.65    1.03
   1 -22  -4   14.56    1.38
  -1 -22   4   17.68    1.35
   1 -22  -4   17.32    1.19
   1 -22  -4   16.37    1.34
   1 -22  -4   15.00    1.11
  -1 -22   4   15.68    1.12
   1  22  -3    0.42    0.38
   1  22  -3    0.08    0.38
   1  22  -3    1.19    0.53
   1  22  -3    1.63    0.49
   1  22  -3    0.46    0.26
   1 -22  -3    0.92    0.56
   1 -22  -3    0.57    0.53
   1 -22  -3    1.35    0.46
   1 -22  -3    0.69    0.36
  -1 -22   3    0.51    0.42
   1 -22  -3    0.24    0.64
  -1 -22   3    0.90    0.46
   1  22  -2    1.90    0.39
   1  22  -2    2.18    0.34
   1  22  -2    1.34    0.46
   1  22  -2    1.62    0.47
   1  22  -2    2.32    0.51
   1 -22  -2    2.79    0.52
   1 -22  -2    1.08    1.06
   1 -22  -2    2.81    0.71
   1 -22  -2    1.78    0.54
   1 -22  -2    1.49    0.39
   1 -22  -2    2.39    0.51
  -1 -22   2    2.09    0.43
   1  22  -1    9.96    0.60
   1  22  -1    9.88    0.85
   1  22  -1   10.38    0.84
   1  22  -1    9.77    0.71
   1  22  -1    9.48    0.67
   1 -22  -1    9.55    0.87
   1 -22  -1    9.49    0.78
   1 -22  -1   11.04    0.75
  -1 -22   1    9.32    0.65
   1 -22  -1    8.80    0.89
  -1 -22   1    9.70    0.70
   1 -22  -1   10.87    1.05
  -1 -22   1   10.48    1.45
   1 -22  -1   11.25    1.54
  -1 -22   1   10.09    0.62
  -1 -22   1    9.94    0.71
  -1  22   0    0.12    0.13
   1  22   0    0.18    0.33
   1  22   0    0.03    0.19
  -1  22   0   -0.18    0.28
   1  22   0    0.62    0.45
   1  22   0    0.70    0.40
   1 -22   0    0.00    0.33
  -1 -22   0    0.17    0.22
  -1 -22   0   -0.28    0.67
   1 -22   0   -0.12    0.50
  -1 -22   0    0.61    0.38
  -1 -22   0    0.85    0.30
   1 -22   0    0.45    0.31
   1 -22   0   -0.27    0.38
  -1 -22   0    0.33    0.30
   1 -22   0   -0.46    0.61
  -1 -22   0    0.06    0.27
   1 -22   0   -0.41    0.39
  -1 -22   0    1.03    0.38
  -1  22  -1   13.83    0.94
   1  22   1   13.57    1.04
   1  22   1   13.17    0.77
  -1  22  -1   12.98    0.67
  -1  22  -1   13.61    0.80
  -1  22  -1   13.09    0.61
   1 -22   1   12.71    0.61
  -1 -22  -1   13.90    0.99
   1 -22   1   13.25    0.63
   1 -22   1   12.98    0.98
  -1 -22  -1   13.40    0.62
  -1 -22  -1   15.61    0.95
  -1 -22  -1   14.41    0.81
   1 -22   1   12.53    0.98
  -1 -22  -1   14.21    1.03
  -1  22  -2    0.78    0.44
  -1  22  -2    1.22    0.35
   1  22   2    0.94    0.36
  -1  22  -2    1.29    0.32
  -1  22  -2    0.65    0.39
  -1  22  -2    0.93    0.29
   1  22   2    1.11    0.58
  -1 -22  -2    0.98    0.28
  -1 -22  -2    0.08    1.06
  -1 -22  -2    1.42    0.26
   1 -22   2    1.37    0.33
   1 -22   2    0.76    0.37
  -1 -22  -2    1.42    0.73
  -1 -22  -2    1.64    0.45
  -1 -22  -2    1.35    0.36
  -1 -22  -2    1.29    0.47
  -1 -22  -2    0.16    0.46
  -1  22  -3    0.20    0.30
   1  22   3   -0.37    0.33
   1  22   3   -0.25    0.52
  -1  22  -3    0.90    0.42
  -1  22  -3    0.41    0.34
  -1 -22  -3    0.54    0.70
  -1 -22  -3   -0.28    0.31
  -1 -22  -3   -0.02    0.49
   1 -22   3   -0.16    0.31
  -1 -22  -3   -0.40    0.38
  -1 -22  -3    0.19    0.27
   1 -22   3   -0.45    0.37
  -1 -22  -3    0.45    0.25
   1  22   4   14.58    0.82
  -1  22  -4   17.50    0.93
  -1  22  -4   16.54    1.04
   1  22   4   15.17    1.38
   1  22   4   15.73    0.92
  -1  22  -4   17.14    0.93
  -1  22  -4   15.00    1.02
  -1  22  -4   17.84    1.09
  -1 -22  -4   15.06    0.76
  -1 -22  -4   17.91    0.87
   1 -22   4   16.12    1.10
  -1 -22  -4   16.54    1.33
  -1 -22  -4   18.19    1.17
   1 -22   4   16.77    1.03
  -1 -22  -4   14.51    1.04
  -1  22  -5   -0.19    0.52
  -1  22  -5    0.02    0.34
   1  22   5    0.71    0.39
  -1  22  -5    0.03    0.51
   1  22   5    0.67    0.72
   1  22   5    0.54    0.43
   1  22   5    0.62    0.44
  -1 -22  -5    0.87    0.55
  -1 -22  -5    0.71    0.37
   1 -22   5    0.13    0.55
   1 -22   5    0.25    0.53
  -1 -22  -5    0.73    0.33
  -1  22  -6    0.81    0.40
  -1  22  -6    1.16    0.41
  -1  22  -6    0.82    0.65
   1  22   6    0.11    0.54
  -1  22  -6    0.96    0.69
   1 -22   6    0.01    0.59
  -1 -22  -6    0.99    0.72
   1 -22   6    0.34    0.61
  -1 -22  -6    0.26    0.32
  -1 -22  -6    0.63    0.60
  -1  22  -7    1.10    0.52
  -1  22  -7    0.44    0.42
   1  22   7    0.57    0.60
  -1  22  -7    0.50    0.76
   1 -22   7   -0.06    0.74
  -1 -22  -7   -0.16    0.63
   1 -22   7    1.37    0.81
  -1 -22  -7    0.47    0.53
  -1  22  -8    2.12    1.11
   1  22   8    0.47    0.81
  -1  22  -8    2.22    0.64
   1 -22   8    3.82    0.91
  -1 -22  -8    2.61    0.72
  -1 -22  -8    3.00    0.84
   1  23  -8   -0.04    0.92
  -1  23   8    2.36    0.82
   1  23  -8    1.23    0.57
  -1 -23   8    1.38    1.01
   1 -23  -8    0.92    0.86
  -1  23   7   -0.71    0.62
   1  23  -7    0.87    0.75
   1  23  -7   -0.38    0.41
  -1 -23   7    1.70    0.86
  -1 -23   7   -0.06    1.34
   1 -23  -7   -0.26    0.66
  -1  23   6    4.49    0.74
  -1  23   6    5.37    0.81
  -1  23   6    4.42    0.57
   1  23  -6    4.49    0.81
  -1 -23   6    7.75    1.27
  -1 -23   6    3.57    0.82
   1 -23  -6    5.72    0.95
   1 -23  -6    3.80    0.44
  -1  23   5    3.35    0.50
   1  23  -5    2.75    0.42
   1  23  -5    2.54    0.68
  -1  23   5    2.49    0.38
  -1 -23   5    2.46    0.71
   1 -23  -5    1.92    0.63
  -1 -23   5    2.17    0.79
   1  23  -4    9.27    1.23
   1  23  -4    8.89    0.67
   1  23  -4    9.60    0.87
   1  23  -4    8.83    1.29
  -1 -23   4    8.10    0.94
   1 -23  -4    7.58    0.91
   1 -23  -4    7.39    1.04
  -1 -23   4    8.51    0.96
   1  23  -3    1.79    0.36
   1  23  -3    1.25    0.51
   1  23  -3    1.92    0.56
   1  23  -3    2.49    0.46
   1 -23  -3    2.24    0.53
   1 -23  -3    2.14    0.54
  -1 -23   3    2.00    0.51
  -1 -23   3    1.53    0.49
   1 -23  -3    1.92    0.65
   1 -23  -3    0.91    0.79
   1 -23  -3    2.36    0.48
   1  23  -2    0.90    0.45
   1  23  -2    1.19    0.40
   1  23  -2    0.57    0.52
   1  23  -2    0.03    0.27
   1  23  -2    0.27    0.40
   1 -23  -2    0.45    0.33
  -1 -23   2    1.06    0.37
   1 -23  -2    1.07    0.63
   1 -23  -2    1.12    0.46
  -1 -23   2    0.25    0.39
   1 -23  -2    0.86    1.07
   1 -23  -2   -0.04    0.50
   1  23  -1    2.03    0.37
   1  23  -1    2.99    0.56
   1  23  -1    1.85    0.31
   1  23  -1    1.82    0.53
   1  23  -1    2.65    0.48
  -1 -23   1    2.18    0.39
  -1 -23   1    2.30    0.89
   1 -23  -1    1.62    0.90
   1 -23  -1    1.96    0.47
   1 -23  -1    2.87    0.57
   1 -23  -1    2.91    0.61
   1 -23  -1    2.62    0.61
   1 -23  -1    2.34    0.43
  -1 -23   1    3.60    0.55
  -1 -23   1    1.79    0.42
  -1 -23   1    2.44    0.37
  -1  23   0    8.96    0.43
  -1  23   0    8.75    0.73
  -1  23   0    8.01    0.46
   1  23   0   10.19    0.88
   1  23   0   10.11    0.71
   1  23   0    9.92    0.91
   1 -23   0    9.25    0.83
   1 -23   0    9.39    0.71
   1 -23   0    9.75    0.95
  -1 -23   0    7.80    0.83
  -1 -23   0    9.17    0.55
   1 -23   0    9.08    0.72
  -1 -23   0    7.84    1.49
   1 -23   0    8.77    1.34
  -1 -23   0    7.68    0.66
  -1 -23   0    8.19    0.63
  -1 -23   0    8.61    0.64
  -1 -23   0    9.14    0.80
   1 -23   0    8.42    0.86
  -1  23  -1    0.04    0.30
   1  23   1    0.19    0.31
   1  23   1    0.04    0.45
  -1  23  -1    0.08    0.23
  -1  23  -1   -0.10    0.18
  -1 -23  -1    0.50    0.92
   1 -23   1    0.53    0.48
   1 -23   1   -0.25    0.20
  -1 -23  -1    0.05    0.32
   1 -23   1   -0.29    0.47
   1 -23   1   -0.24    0.18
  -1 -23  -1    0.06    0.46
  -1 -23  -1   -0.06    0.20
  -1 -23  -1   -0.17    0.32
  -1 -23  -1    0.11    0.27
   1 -23   1    0.40    0.33
  -1  23  -2    0.14    0.26
  -1  23  -2    0.62    0.32
  -1  23  -2    0.25    0.29
   1  23   2   -0.44    0.29
   1  23   2   -0.29    0.19
   1  23   2    0.74    0.56
  -1  23  -2   -0.37    0.42
  -1 -23  -2   -0.01    0.52
  -1 -23  -2   -0.20    0.36
  -1 -23  -2    0.44    1.13
  -1 -23  -2   -0.12    0.21
  -1 -23  -2   -0.06    0.42
   1 -23   2   -0.17    0.32
  -1 -23  -2    0.13    0.32
  -1 -23  -2    0.09    0.66
  -1 -23  -2    0.13    0.25
   1 -23   2   -0.13    0.24
   1  23   3    2.58    0.77
  -1  23  -3    2.29    0.45
  -1  23  -3    2.24    0.48
  -1  23  -3    1.80    0.57
  -1  23  -3    1.77    0.39
   1  23   3    2.41    0.45
   1 -23   3    2.19    0.43
   1 -23   3    2.18    0.50
  -1 -23  -3    2.31    0.57
  -1 -23  -3    2.94    1.40
  -1 -23  -3    1.15    0.63
  -1 -23  -3    1.98    0.33
  -1 -23  -3    1.63    0.42
   1  23   4    6.01    1.01
  -1  23  -4    8.54    0.95
  -1  23  -4    7.64    0.70
  -1  23  -4    6.77    0.83
   1  23   4    6.97    0.75
  -1  23  -4    7.62    0.71
  -1  23  -4    7.01    0.84
   1 -23   4    8.46    0.89
  -1 -23  -4    5.94    0.56
  -1 -23  -4    5.11    0.78
  -1 -23  -4    7.87    0.92
   1 -23   4    6.79    0.82
  -1 -23  -4    7.09    0.64
  -1  23  -5    0.42    0.37
   1  23   5   -0.26    0.45
   1  23   5    0.18    0.40
  -1  23  -5   -0.51    0.51
  -1  23  -5    0.92    0.54
   1  23   5    0.44    0.60
  -1  23  -5    0.86    0.34
  -1 -23  -5    0.87    0.38
  -1 -23  -5    0.00    0.49
  -1 -23  -5   -0.07    0.30
   1 -23   5   -0.45    0.54
   1 -23   5   -0.22    0.51
  -1  23  -6    4.81    0.76
   1  23   6    4.63    0.74
  -1  23  -6    3.29    0.52
  -1  23  -6    4.43    0.87
  -1 -23  -6    4.63    0.84
  -1 -23  -6    3.20    0.47
  -1 -23  -6    4.51    0.70
   1 -23   6    4.14    0.81
   1 -23   6    5.05    0.87
  -1  23  -7   -0.85    0.78
  -1  23  -7    0.87    0.47
   1  23   7   -0.55    0.62
  -1  23  -7   -0.50    0.55
  -1 -23  -7    0.42    0.68
  -1 -23  -7    0.33    0.56
   1 -23   7    0.29    0.82
  -1  23  -8   -0.20    0.55
  -1  23  -8    0.81    1.01
   1  23   8   -0.06    0.76
  -1 -23  -8    0.51    0.68
  -1 -23  -8    0.12    0.83
   1 -23   8    0.27    0.95
   1  24  -8    6.07    1.20
   1  24  -8    3.95    0.71
  -1  24   8    6.02    1.04
  -1 -24   8    6.32    1.29
   1  24  -7    0.16    0.44
  -1  24   7   -0.30    0.63
   1  24  -7    0.78    0.80
   1 -24  -7    0.72    0.72
   1  24  -6   -0.57    0.62
   1  24  -6    0.46    0.43
  -1  24   6   -0.11    0.45
  -1 -24   6    0.91    0.81
   1 -24  -6    0.31    0.62
  -1 -24   6    1.50    0.90
   1  24  -5    2.72    0.44
   1  24  -5    1.89    0.59
  -1 -24   5    2.75    0.72
   1 -24  -5    3.49    0.76
  -1 -24   5    3.10    0.81
   1  24  -4    0.46    0.30
   1  24  -4   -0.78    0.43
   1 -24  -4    0.35    0.51
   1 -24  -4   -1.16    0.60
  -1 -24   4    0.65    0.57
  -1 -24   4    0.30    0.53
   1  24  -3    3.15    0.54
   1  24  -3    2.86    0.42
   1  24  -3    2.97    0.60
   1 -24  -3    2.50    0.63
  -1 -24   3    2.33    0.54
   1 -24  -3    2.09    0.92
   1 -24  -3    3.36    0.61
   1 -24  -3    1.96    0.47
  -1 -24   3    2.47    0.55
   1 -24  -3    1.89    0.69
   1  24  -2   20.62    1.13
   1  24  -2   20.74    0.99
   1  24  -2   18.93    1.13
   1  24  -2   16.40    1.19
   1 -24  -2   21.88    1.46
  -1 -24   2   21.26    1.08
   1 -24  -2   20.01    1.08
  -1 -24   2   18.16    0.99
  -1 -24   2   18.86    1.06
   1 -24  -2   19.45    1.16
   1 -24  -2   21.56    1.32
   1 -24  -2   18.97    1.20
   1  24  -1   11.33    1.00
   1  24  -1   13.30    0.82
   1  24  -1   14.63    0.71
   1  24  -1   13.38    0.89
   1  24  -1   12.34    1.00
  -1 -24   1   13.31    0.86
   1 -24  -1   14.94    1.13
   1 -24  -1   14.89    1.20
  -1 -24   1   13.64    0.82
  -1 -24   1   13.48    0.78
   1 -24  -1   12.16    1.17
   1 -24  -1   13.20    0.88
   1 -24  -1   14.76    0.95
  -1 -24   1   13.75    0.74
   1 -24  -1   10.00    1.70
   1  24   0    3.01    0.48
   1  24   0    2.71    0.56
  -1  24   0    4.22    0.62
   1  24   0    4.47    0.79
   1 -24   0    3.60    0.57
   1 -24   0    2.67    0.66
   1 -24   0    3.34    0.69
   1 -24   0    3.10    0.47
  -1 -24   0    2.04    0.53
   1 -24   0    3.73    0.61
  -1 -24   0    2.61    0.39
  -1 -24   0    2.66    0.43
  -1 -24   0    1.31    0.93
  -1 -24   0    3.38    0.47
  -1 -24   0    2.93    0.52
  -1 -24   0    3.01    0.43
   1 -24   0    2.54    0.98
   1  24   1    0.74    0.52
  -1  24  -1    0.36    0.31
  -1  24  -1    0.36    0.26
   1  24   1    0.22    0.24
  -1  24  -1    0.42    0.21
   1 -24   1    0.32    0.47
   1 -24   1    0.27    0.34
  -1 -24  -1   -0.16    0.44
  -1 -24  -1   -0.05    0.46
  -1 -24  -1    0.35    0.28
   1 -24   1    0.28    0.57
  -1 -24  -1    0.27    0.33
  -1 -24  -1    0.35    0.21
   1 -24   1    0.36    0.22
  -1 -24  -1    0.24    0.93
  -1  24  -2    0.42    0.31
   1  24   2   -0.07    0.21
   1  24   2    0.23    0.34
  -1  24  -2    0.27    0.28
   1  24   2    0.44    0.59
  -1  24  -2    0.02    0.33
  -1  24  -2   -0.29    0.46
  -1 -24  -2   -0.10    0.43
   1 -24   2   -0.13    0.27
  -1 -24  -2   -0.72    0.42
  -1 -24  -2    0.72    0.36
  -1 -24  -2   -0.25    0.22
  -1 -24  -2    0.17    0.58
   1 -24   2   -0.03    0.34
  -1  24  -3    0.43    0.44
  -1  24  -3    0.99    0.34
  -1  24  -3    0.51    0.41
   1  24   3    0.13    0.42
  -1  24  -3    0.65    0.50
   1  24   3    0.00    0.70
   1  24   3    0.75    0.28
  -1 -24  -3    0.96    0.30
   1 -24   3    0.95    0.47
  -1 -24  -3    0.75    0.29
  -1 -24  -3    1.03    0.52
  -1 -24  -3    0.25    0.41
  -1 -24  -3   -1.75    1.12
   1 -24   3    0.05    0.38
  -1 -24  -3    0.67    0.62
   1  24   4    0.54    0.72
  -1  24  -4    0.84    0.34
  -1  24  -4    0.54    0.39
  -1  24  -4    1.58    0.59
   1  24   4    0.77    0.48
  -1  24  -4    1.03    0.49
  -1  24  -4   -0.37    0.52
  -1 -24  -4    1.52    0.52
  -1 -24  -4    1.04    0.34
  -1 -24  -4    0.44    0.48
   1 -24   4    0.31    0.44
   1 -24   4    0.70    0.56
  -1 -24  -4    0.58    0.32
   1  24   5   -0.09    0.41
  -1  24  -5   -0.46    0.53
  -1  24  -5    0.84    0.40
   1  24   5    0.10    0.52
  -1 -24  -5    1.36    0.41
   1 -24   5    0.55    0.54
  -1 -24  -5   -0.10    0.32
  -1 -24  -5    0.63    0.62
   1 -24   5    2.50    0.66
   1  24   6    0.42    0.56
  -1  24  -6    0.66    0.44
  -1  24  -6    1.36    0.69
  -1  24  -6    0.11    0.40
  -1 -24  -6    0.56    0.56
  -1 -24  -6   -0.14    0.45
   1 -24   6    0.06    0.71
  -1  24  -7    1.13    1.41
   1  24   7   -0.02    0.68
  -1  24  -7    0.33    0.50
  -1 -24  -7    1.77    0.60
   1 -24   7    0.48    0.88
  -1 -24  -7   -0.02    0.68
   1  24   8    0.50    0.84
  -1  24  -8    1.84    0.68
  -1 -24  -8   -0.16    0.75
  -1 -24  -8   -0.97    1.21
   1 -24   8    1.01    1.03
   1  25  -7    1.32    0.53
   1  25  -7    0.22    0.82
   1 -25  -7   -0.88    0.67
  -1 -25   7    1.25    0.97
   1 -25  -7    0.76    0.42
   1  25  -6    2.07    0.77
   1  25  -6    1.18    0.46
  -1 -25   6   -0.51    0.80
   1 -25  -6    1.11    0.70
   1  25  -5    2.45    0.65
   1  25  -5    1.22    0.44
   1 -25  -5    1.68    0.63
  -1 -25   5    1.73    0.74
  -1 -25   5    1.11    0.73
   1  25  -4    0.38    0.32
   1  25  -4    1.19    0.50
   1 -25  -4    1.49    0.64
   1 -25  -4   -0.59    0.67
  -1 -25   4    1.35    0.54
  -1 -25   4    1.19    0.57
   1  25  -3    5.74    0.59
   1  25  -3    6.05    0.71
  -1 -25   3    5.10    1.15
   1 -25  -3    6.35    0.87
   1 -25  -3    6.86    0.88
  -1 -25   3    6.02    0.87
   1  25  -2    4.68    0.78
   1  25  -2    3.44    0.57
   1 -25  -2    1.88    1.22
   1 -25  -2    3.32    0.84
   1 -25  -2    4.47    0.68
  -1 -25   2    4.05    0.56
  -1 -25   2    5.47    0.73
   1 -25  -2    3.80    0.70
  -1 -25   2    4.07    0.62
   1 -25  -2    3.11    0.71
   1 -25  -2    5.30    0.77
   1  25  -1    0.68    0.55
   1  25  -1    0.34    0.40
   1  25  -1    0.11    0.34
   1  25  -1   -0.10    0.26
  -1 -25   1    0.58    0.40
   1 -25  -1    0.60    0.41
  -1 -25   1    0.17    0.33
  -1 -25   1    1.02    0.92
   1 -25  -1    1.12    0.47
   1 -25  -1    0.81    0.69
  -1 -25   1    0.53    0.35
   1 -25  -1    1.22    0.59
   1 -25  -1    0.14    0.49
  -1 -25   1    0.89    0.39
   1  25   0    7.54    0.72
  -1  25   0    7.09    0.76
   1  25   0    9.08    0.97
   1 -25   0    6.67    1.03
  -1 -25   0    7.34    1.56
  -1 -25   0    8.11    0.70
   1 -25   0    6.52    0.93
  -1 -25   0    8.32    0.53
   1 -25   0    7.64    0.77
  -1 -25   0    6.46    0.89
   1 -25   0    7.41    1.48
  -1 -25   0    6.48    0.90
  -1 -25   0    8.14    0.63
  -1  25  -1    0.36    0.21
  -1  25  -1    0.18    0.46
   1  25   1    0.27    0.34
  -1  25  -1    0.32    0.34
  -1  25  -1    0.23    0.28
   1  25   1   -0.14    0.57
   1  25   1    0.02    0.21
  -1 -25  -1    0.36    0.29
  -1 -25  -1   -0.12    0.45
   1 -25   1   -0.01    0.52
   1 -25   1   -0.18    0.86
   1 -25   1    0.10    0.41
  -1 -25  -1    0.65    0.50
  -1 -25  -1    0.92    0.40
  -1 -25  -1    0.27    0.21
  -1 -25  -1    0.73    1.02
   1 -25   1    0.27    0.21
  -1 -25  -1    0.25    0.35
  -1  25  -2   -0.11    0.32
   1  25   2   -0.41    0.35
   1  25   2    0.48    0.59
   1  25   2    0.11    0.22
  -1  25  -2    0.52    0.36
  -1  25  -2   -0.63    0.52
  -1 -25  -2   -0.17    0.53
  -1 -25  -2    0.09    0.49
  -1 -25  -2   -0.53    1.17
  -1 -25  -2    0.15    0.45
  -1 -25  -2   -0.62    0.37
   1 -25   2    0.03    0.36
  -1 -25  -2   -0.32    0.23
   1 -25   2    0.37    0.32
  -1  25  -3   12.52    0.86
  -1  25  -3   12.25    1.07
   1  25   3   11.03    0.67
  -1  25  -3   12.60    0.89
   1  25   3   11.39    0.81
   1  25   3   10.63    1.24
  -1  25  -3    9.22    0.87
  -1 -25  -3    9.53    1.30
  -1 -25  -3   13.86    0.95
  -1 -25  -3   13.48    0.67
  -1 -25  -3    9.56    1.01
   1 -25   3   12.46    0.94
   1 -25   3   11.23    0.81
  -1  25  -4    0.39    0.39
   1  25   4    1.09    0.51
   1  25   4    0.99    0.38
  -1  25  -4   -0.26    0.51
   1 -25   4    1.02    0.55
  -1 -25  -4    0.81    0.39
  -1 -25  -4    1.08    0.35
   1 -25   4    1.12    0.52
  -1 -25  -4    0.28    0.57
  -1  25  -5    0.01    0.62
   1  25   5   -0.73    0.58
  -1  25  -5   -0.06    0.43
  -1  25  -5   -0.18    0.38
  -1 -25  -5   -0.44    0.32
  -1 -25  -5    0.08    0.65
   1 -25   5   -0.20    0.62
   1 -25   5    0.01    0.53
  -1  25  -6    0.33    0.47
  -1  25  -6    1.67    0.72
   1 -25   6    1.04    0.77
  -1 -25  -6    0.70    0.63
  -1 -25  -6    1.11    0.49
  -1  25  -7    0.19    0.53
  -1 -25  -7    2.61    0.63
   1 -25   7    1.64    0.88
  -1 -25  -7    0.95    0.77
   1  26  -7    0.37    0.54
   1 -26  -7    2.15    0.97
  -1 -26   7   -0.18    0.97
   1  26  -6    0.39    0.44
   1  26  -6    0.14    0.71
  -1 -26   6    1.92    0.85
   1 -26  -6    0.87    0.77
   1  26  -5    6.36    0.74
   1  26  -5    7.93    1.11
   1 -26  -5    7.52    1.10
  -1 -26   5    7.22    1.18
   1  26  -4    6.40    0.89
   1  26  -4    6.38    0.69
  -1 -26   4    6.48    0.84
   1 -26  -4    5.89    0.95
   1 -26  -4    7.29    1.00
  -1 -26   4    6.35    0.85
   1  26  -3    0.38    0.42
   1  26  -3    0.31    0.33
   1 -26  -3    1.30    0.60
  -1 -26   3    0.31    0.52
  -1 -26   3    0.65    0.47
   1 -26  -3    0.40    0.66
   1  26  -2    0.75    0.35
   1  26  -2    0.76    0.40
   1  26  -2    0.85    0.49
   1 -26  -2    1.25    0.57
  -1 -26   2    0.80    0.46
  -1 -26   2    1.72    0.40
   1 -26  -2    0.50    0.52
   1 -26  -2   -0.07    0.68
   1 -26  -2    2.61    1.02
  -1 -26   2    0.72    0.43
   1  26  -1    1.12    0.42
   1  26  -1   -0.13    0.27
   1  26  -1    0.36    0.37
   1  26  -1   -0.35    0.54
  -1 -26   1    0.21    0.85
  -1 -26   1    0.10    0.45
   1 -26  -1    1.76    0.80
  -1 -26   1   -0.01    0.31
   1 -26  -1   -0.93    0.41
   1 -26  -1    0.25    0.48
  -1 -26   1    0.65    0.40
   1 -26  -1   -0.03    0.49
   1 -26  -1   -0.55    0.56
   1  26   0    0.16    0.55
  -1  26   0    0.78    0.50
   1  26   0    0.91    0.38
  -1 -26   0    1.05    0.26
   1 -26   0    1.26    0.52
  -1 -26   0    1.72    1.05
  -1 -26   0    1.15    0.37
  -1 -26   0    0.49    0.41
  -1 -26   0    0.25    0.51
   1 -26   0   -0.18    0.73
   1 -26   0    1.07    0.46
   1 -26   0   -0.17    1.06
  -1 -26   0    0.82    0.51
  -1  26  -1    0.35    0.60
   1  26   1    0.26    0.22
   1  26   1    0.92    0.37
  -1  26  -1    0.10    0.29
   1  26   1    0.25    0.67
   1 -26   1    0.38    0.38
  -1 -26  -1    0.58    0.59
  -1 -26  -1    0.81    1.17
  -1 -26  -1    0.07    0.24
  -1 -26  -1   -0.31    0.48
  -1 -26  -1   -0.16    0.45
   1 -26   1   -0.42    0.73
  -1 -26  -1   -0.59    0.38
  -1 -26  -1   -0.10    0.43
  -1  26  -2   -0.20    0.31
   1  26   2   -0.65    0.36
   1  26   2   -0.07    0.26
   1  26   2    0.12    0.67
  -1  26  -2    0.00    0.36
  -1 -26  -2   -0.57    0.48
   1 -26   2    0.07    0.32
  -1 -26  -2    0.09    0.27
  -1 -26  -2    0.23    0.40
  -1 -26  -2    0.42    0.50
  -1 -26  -2   -0.37    1.23
  -1 -26  -2   -0.07    0.25
   1 -26   2   -0.13    0.30
  -1 -26  -2   -0.33    0.60
  -1  26  -3    5.52    0.72
   1  26   3    6.01    0.72
   1  26   3    8.45    1.23
   1  26   3    7.99    0.60
  -1  26  -3    7.19    0.84
  -1  26  -3    7.22    0.74
  -1 -26  -3    6.92    0.84
  -1 -26  -3    7.92    0.96
   1 -26   3    5.44    0.69
  -1 -26  -3    8.64    0.55
   1 -26   3    6.08    0.81
   1  26   4    1.10    0.52
  -1  26  -4    1.54    0.54
  -1  26  -4    1.80    0.44
  -1 -26  -4    2.21    0.39
  -1 -26  -4    1.56    0.38
   1 -26   4    1.61    0.54
  -1 -26  -4    1.41    0.57
   1 -26   4    1.56    0.60
   1  26   5    1.25    0.76
  -1  26  -5    1.81    0.49
  -1  26  -5    2.24    0.70
  -1 -26  -5    1.18    0.70
   1 -26   5    1.99    0.73
  -1 -26  -5    2.52    0.45
  -1  26  -6    0.02    0.46
  -1 -26  -6    1.88    0.52
   1 -26   6    1.01    0.84
  -1 -26  -6    0.77    0.73
   1  26   7    2.74    0.85
  -1  26  -7    1.01    0.60
   1 -26   7    0.47    1.00
  -1 -26  -7    1.38    1.00
  -1 -26  -7    1.03    0.62
   1  27  -7    2.64    0.65
   1 -27  -7    1.01    0.86
  -1 -27   7    2.23    1.05
   1  27  -6    0.47    0.50
   1 -27  -6    1.24    0.81
  -1 -27   6    1.13    0.93
   1  27  -5   -0.59    0.40
   1  27  -5   -0.68    0.61
  -1 -27   5    0.59    0.75
   1 -27  -5    0.74    0.66
   1  27  -4    0.41    0.53
   1 -27  -4    1.23    0.67
   1  27  -3    1.46    0.47
   1  27  -3    0.95    0.41
   1 -27  -3    0.83    0.67
   1 -27  -3    0.30    0.58
  -1 -27   3    1.95    0.59
  -1 -27   3    0.43    0.58
   1  27  -2    2.60    0.49
   1  27  -2    3.94    0.59
   1  27  -2    3.25    0.74
  -1 -27   2    3.33    1.24
  -1 -27   2    3.97    0.64
  -1 -27   2    2.59    0.57
   1 -27  -2    1.78    1.31
   1 -27  -2    4.02    0.73
   1 -27  -2    2.95    0.71
  -1 -27   2    2.97    0.50
   1  27  -1    1.06    0.46
   1  27  -1    0.17    0.28
   1 -27  -1    0.76    0.62
  -1 -27   1    1.30    0.89
  -1 -27   1   -0.16    0.28
   1 -27  -1    0.02    1.07
   1 -27  -1    0.47    0.54
  -1 -27   1    0.04    0.41
   1 -27  -1    0.66    0.54
  -1 -27   1    0.27    0.39
   1 -27  -1   -0.52    0.78
  -1  27   0    6.16    0.81
   1  27   0    5.97    0.74
   1  27   0    4.88    0.49
   1 -27   0    5.02    0.99
   1 -27   0    6.41    0.84
  -1 -27   0    6.72    0.62
  -1 -27   0    5.75    0.90
   1 -27   0    6.34    0.93
  -1 -27   0    7.02    0.75
  -1 -27   0    5.90    0.48
  -1 -27   0    5.59    0.75
  -1  27  -1    2.40    0.49
   1  27   1    2.67    0.47
   1  27   1    1.99    0.70
  -1  27  -1    2.65    0.35
   1  27   1    2.54    0.37
  -1  27  -1    3.28    0.49
  -1 -27  -1    1.97    0.63
  -1 -27  -1    1.83    0.49
   1 -27   1    2.18    1.00
  -1 -27  -1    2.55    0.39
  -1 -27  -1    3.37    0.57
   1 -27   1    2.11    0.55
  -1 -27  -1    3.21    0.62
  -1 -27  -1    2.84    0.69
  -1  27  -2    6.84    0.70
  -1  27  -2    6.85    0.68
   1  27   2    6.65    0.53
   1  27   2    7.11    0.69
  -1  27  -2    6.29    0.76
   1 -27   2    5.69    0.80
  -1 -27  -2    5.70    0.87
  -1 -27  -2    4.73    0.90
   1 -27   2    8.40    0.60
   1 -27   2    6.41    0.61
  -1 -27  -2    8.09    1.00
  -1  27  -3    2.44    0.47
  -1  27  -3    2.33    0.52
   1  27   3    1.74    0.48
   1 -27   3    2.45    0.48
  -1 -27  -3    2.52    0.71
   1 -27   3    2.10    0.50
  -1  27  -4    1.07    0.57
  -1  27  -4    1.40    0.45
   1  27   4    1.40    0.55
  -1 -27  -4    2.17    0.36
   1 -27   4   -0.07    0.59
  -1 -27  -4    0.30    0.58
  -1  27  -5    0.34    0.42
  -1 -27  -5    0.49    0.72
   1 -27   5   -0.54    0.69
  -1 -27  -5    1.00    0.39
  -1  27  -6    0.67    0.51
  -1 -27  -6    1.15    0.51
  -1 -27  -6    0.13    0.83
   1 -27   6    1.48    0.92
   1  28  -6   -0.35    0.49
   1 -28  -6   -0.52    0.82
  -1 -28   6   -1.48    0.89
   1  28  -5    0.07    0.45
  -1 -28   5    1.10    0.78
   1 -28  -5    0.95    0.88
   1  28  -4    2.75    0.51
   1  28  -4    3.74    1.08
   1 -28  -4    2.12    0.71
  -1 -28   4    2.04    0.71
   1  28  -3    4.29    0.60
  -1 -28   3    3.04    0.61
  -1 -28   3    2.71    0.53
   1 -28  -3    2.79    0.84
   1 -28  -3    2.61    0.74
   1  28  -2    1.83    0.50
   1  28  -2    1.21    0.46
   1  28  -2    1.98    0.61
  -1 -28   2    1.53    0.54
  -1 -28   2    1.09    1.01
   1 -28  -2    0.48    0.67
   1 -28  -2    0.09    1.39
  -1 -28   2    2.11    0.49
   1 -28  -2    1.60    0.70
   1  28  -1    1.19    0.53
  -1 -28   1    0.88    0.44
  -1 -28   1    0.69    0.34
   1 -28  -1    0.70    0.61
   1 -28  -1    0.68    0.82
  -1 -28   1    0.38    0.43
  -1 -28   1    0.17    0.92
   1 -28  -1   -0.90    1.07
   1 -28  -1   -0.79    1.15
   1 -28  -1    0.47    0.59
   1  28   0    0.07    0.26
   1  28   0    0.73    0.45
   1 -28   0   -0.24    0.60
  -1 -28   0    0.27    0.62
  -1 -28   0    0.54    0.48
   1 -28   0    0.66    1.05
  -1 -28   0    0.39    0.26
  -1 -28   0   -0.07    1.07
   1 -28   0    1.38    0.58
  -1 -28   0    1.53    0.69
  -1  28  -1    0.25    0.43
  -1  28  -1    1.15    0.31
   1  28   1    1.16    0.47
   1  28   1    1.54    0.43
  -1  28  -1    0.71    0.37
  -1 -28  -1    0.79    0.56
  -1 -28  -1    1.18    0.26
   1 -28   1   -0.35    0.90
  -1 -28  -1    1.36    0.30
  -1 -28  -1    0.79    0.50
  -1 -28  -1    1.53    0.61
  -1 -28  -1    1.37    0.65
  -1 -28  -1   -0.45    1.23
   1 -28   1    0.58    0.54
  -1  28  -2    4.49    0.74
  -1  28  -2    3.13    0.50
   1  28   2    2.55    0.43
   1  28   2    4.07    0.63
  -1  28  -2    2.68    0.56
  -1 -28  -2    3.56    0.73
   1 -28   2    2.28    0.40
   1 -28   2    3.10    0.65
  -1  28  -3    7.50    0.83
   1  28   3    8.38    0.73
  -1 -28  -3    7.93    1.11
   1 -28   3    7.01    1.07
  -1  28  -4    0.16    0.43
   1 -28   4   -0.75    0.56
  -1 -28  -4   -0.48    0.65
  -1  28  -5    1.57    0.51
  -1 -28  -5    2.66    0.89
   1 -28   5    0.27    0.71
  -1  28  -6   -0.70    0.49
   1 -28   6    0.48    0.86
  -1 -28  -6    0.66    0.61
  -1 -28  -6    1.87    1.08
   1  29  -6    0.90    0.57
   1 -29  -6    1.82    1.00
  -1 -29   6    1.78    1.04
   1  29  -5    4.47    0.66
  -1 -29   5    4.16    0.94
   1 -29  -5    5.99    1.05
   1  29  -4    0.11    0.46
  -1 -29   4   -0.77    0.61
   1 -29  -4    1.05    0.66
   1  29  -3    8.37    0.86
   1 -29  -3    7.42    1.15
   1 -29  -3    7.34    1.09
  -1 -29   3    8.46    0.91
   1  29  -2    0.46    0.42
  -1 -29   2    0.79    1.07
  -1 -29   2    0.95    0.48
   1 -29  -2    0.51    1.47
   1 -29  -2    0.69    0.73
   1 -29  -2   -0.86    0.63
  -1 -29   2   -0.10    0.42
   1  29  -1    1.70    0.59
  -1 -29   1    0.44    0.34
  -1 -29   1    1.12    1.16
   1 -29  -1    0.01    1.30
  -1 -29   1    1.24    0.52
   1 -29  -1   -0.35    0.58
   1 -29  -1    0.26    0.70
  -1 -29   1    1.29    0.45
  -1 -29   0    4.91    0.77
  -1 -29   0    3.99    0.67
   1 -29   0    3.38    1.23
  -1 -29   0    4.25    0.63
   1 -29   0    4.13    0.72
   1 -29   0    3.61    0.84
  -1 -29   0    4.04    0.45
  -1  29  -1    0.76    0.31
   1  29   1    1.29    0.44
  -1  29  -1    0.20    0.47
  -1 -29  -1    0.37    0.56
  -1 -29  -1    0.80    0.79
   1 -29   1    0.82    0.59
   1 -29   1    1.04    1.09
  -1 -29  -1    0.82    0.61
  -1 -29  -1    1.61    1.41
  -1  29  -2    1.07    0.51
  -1  29  -2    2.13    0.49
   1  29   2    2.93    0.47
  -1 -29  -2    1.60    0.73
   1 -29   2    2.01    0.59
   1 -29   2    1.50    0.36
   1 -29   2    2.03    0.37
  -1  29  -3    1.43    0.48
  -1 -29  -3    2.01    0.72
  -1  29  -4    0.32    0.49
  -1 -29  -4    1.56    0.74
   1 -29   4    1.33    0.64
  -1  29  -5    1.47    0.54
  -1 -29  -5    2.88    0.90
   1 -29   5    1.85    0.84
   1  30  -5   -0.06    0.52
  -1 -30   5   -0.52    0.74
   1 -30  -5    0.36    1.63
   1  30  -4   -0.01    0.49
   1 -30  -4    0.76    0.75
  -1 -30   4   -1.24    0.69
   1  30  -3    0.31    0.50
  -1 -30   3    0.37    0.55
   1 -30  -3    0.27    0.70
   1 -30  -3    1.21    1.01
   1  30  -2   12.94    1.05
   1 -30  -2   13.72    1.31
   1 -30  -2   14.56    1.34
  -1 -30   2   10.50    0.86
   1  30  -1    3.18    0.73
   1 -30  -1    4.30    0.82
   1 -30  -1    2.97    0.84
  -1 -30   1    2.42    1.44
  -1 -30   1    2.94    0.51
   1  30   0    8.60    0.90
  -1 -30   0    8.99    0.65
  -1 -30   0    8.72    1.21
   1 -30   0    7.73    1.25
  -1 -30   0    7.60    0.54
   1 -30   0    9.70    1.12
  -1  30  -1    1.54    0.54
   1 -30   1    0.95    1.19
  -1 -30  -1    0.36    0.66
  -1 -30  -1   -0.85    1.48
   1 -30   1    1.85    0.71
  -1  30  -2    2.15    0.80
  -1  30  -2    1.78    0.56
  -1 -30  -2    0.52    0.73
   1 -30   2    1.50    0.32
   1 -30   2    0.99    1.14
   1 -30   2    2.12    0.67
  -1  30  -3    0.09    0.48
   1 -30   3   -0.05    0.45
  -1 -30  -3    2.55    0.83
  -1  30  -4   -0.18    0.52
   1 -30   4   -0.17    0.61
  -1 -30  -4   -0.65    0.76
  -1  30  -5    1.22    0.59
  -1 -30  -5    0.31    0.95
   1 -30   5    0.07    0.79
   1  31  -4    5.33    0.73
  -1 -31   4    4.00    0.79
   1 -31  -4    4.86    1.37
   1  31  -3    1.21    0.58
   1 -31  -3    3.65    0.96
  -1 -31   3    1.41    1.26
  -1 -31   3    1.97    0.62
   1  31  -2   -0.06    0.58
  -1 -31   2   -0.27    0.45
   1 -31  -2    1.06    0.79
  -1 -31   2   -1.08    1.20
   1 -31  -2   -1.97    1.65
   1 -31  -1    5.97    1.06
   1 -31  -1    1.91    1.68
  -1 -31   1    4.19    0.55
   1 -31  -1    5.78    1.02
  -1 -31   1    4.09    1.70
  -1 -31   0    3.13    0.85
   1 -31   0    2.98    0.91
   1 -31   0   -0.19    1.39
  -1 -31   0   -0.12    1.57
   1 -31   0    3.46    0.94
  -1  31  -1    1.28    0.55
   1 -31   1    0.63    1.36
  -1 -31  -1   -0.86    0.75
  -1 -31  -1   -0.49    1.62
  -1  31  -2    0.52    0.56
   1 -31   2    1.36    1.22
  -1 -31  -2   -2.25    1.79
  -1 -31  -2    2.17    0.92
  -1  31  -3    0.13    0.53
  -1 -31  -3    0.77    0.75
   1 -31   3    0.37    0.49
  -1  31  -4    1.42    0.60
   1 -31   4    0.57    0.70
   1  32  -3    4.05    0.72
  -1 -32   3    2.75    0.69
   1 -32  -3    3.01    1.09
  -1 -32   3    0.98    1.44
   1 -32  -2    1.13    0.81
  -1 -32   2    0.19    0.46
  -1 -32   2   -0.08    1.41
   1 -32  -2   -0.38    1.92
  -1 -32   1    0.71    0.40
   1 -32  -1   -0.42    0.76
   1 -32  -1   -0.82    1.56
  -1 -32   1    0.58    1.48
   1 -32   0   -0.40    1.52
  -1 -32   0   -0.81    1.52
   1 -32   1   -0.18    1.39
  -1 -32  -1   -1.82    1.73
  -1 -32  -1    0.23    0.82
  -1  32  -2    0.54    0.62
  -1 -32  -2    1.14    1.96
  -1 -32  -2    2.13    0.87
   1 -32   2    1.81    1.54
  -1 -32  -3    6.09    1.74
   1 -32   3    5.46    0.77
   1 -33  -2    1.67    2.03
  -1 -33   2   -1.34    1.59
   1 -33  -2   -0.14    1.77
  -1 -33   1    3.69    1.91
   1 -33  -1    1.48    0.98
   1 -33   0    1.18    1.70
  -1 -33  -1    6.62    1.83
   1 -33   1    3.78    1.80
  -1 -33  -1    1.45    2.07
  -1  33  -2    1.28    0.66
  -1 -33  -2   -0.02    2.34
  -1 -33  -2    2.45    0.86
   1 -33   2    1.03    1.52
   2   0 -11    1.16    0.91
  -2   0  11    0.57    1.04
  -2   0  11    1.33    0.96
   2   0 -10    0.03    0.82
   2   0 -10    1.73    0.85
   2   0 -10    1.03    0.70
  -2   0  10    0.72    0.82
  -2   0  10    3.01    0.88
  -2   0   9    0.43    0.67
   2   0  -9    1.09    0.51
  -2   0   9   -0.11    0.60
   2   0  -9    0.26    0.56
   2   0  -9   -0.58    0.58
   2   0  -9    0.71    0.61
  -2   0   8    2.39    0.68
  -2   0   8    1.18    0.60
  -2   0   8    1.59    0.59
   2   0  -8    1.55    0.51
   2   0  -8    1.16    0.54
   2   0  -8    2.34    0.59
  -2   0   7   -0.64    0.46
   2   0  -7   -0.22    0.40
  -2   0   7   -0.15    0.38
   2   0  -7    0.25    0.37
   2   0  -7    0.23    0.37
  -2   0   7   -0.30    0.40
  -2   0   6    3.37    0.54
  -2   0   6    4.72    0.66
   2   0  -6    3.20    0.56
   2   0  -6    3.52    0.59
   2   0  -6    4.09    0.54
  -2   0   6    4.36    0.66
  -2   0   5    0.03    0.23
   2   0  -5    0.07    0.24
   2   0  -5    0.14    0.27
  -2   0   5    0.00    0.30
  -2   0   5    0.38    0.28
   2   0  -4   21.73    0.84
  -2   0   4   20.08    0.91
  -2   0   4   21.90    0.97
  -2   0   4   20.57    0.94
   2   0  -4   20.81    0.95
   2   0  -4   21.17    0.93
  -2   0   3   -0.09    0.20
  -2   0   3    0.05    0.14
   2   0  -3    0.08    0.17
   2   0  -3    0.03    0.12
  -2   0   3   -0.13    0.22
   2   0  -2    5.52    0.41
  -2   0   2    5.41    0.39
   2   0  -2    6.07    0.42
   2   0  -2    5.74    0.38
  -2   0   2    5.74    0.40
   2   0  -2    6.05    0.31
  -2   0   1    0.09    0.11
   2   0  -1    0.15    0.14
   2   0  -1   -0.08    0.07
  -2   0   1   -0.11    0.10
  -2   0   1    0.23    0.15
  -2   0   1   -0.07    0.09
  -2   0   0   38.39    1.20
  -2   0   0   39.20    1.17
   2   0   0   39.67    1.28
   2   0   0   37.29    1.17
   2   0   0   38.70    1.21
   2   0   1    0.04    0.09
  -2   0  -1   -0.02    0.07
  -2   0  -1   -0.03    0.08
   2   0   1    0.00    0.07
  -2   0  -2  101.21    2.98
  -2   0  -2   98.83    2.93
   2   0   2   94.57    2.94
   2   0   2  101.46    2.96
   2   0   3    0.20    0.18
  -2   0  -3    0.08    0.14
   2   0   3    0.16    0.15
   2   0   3    0.01    0.13
  -2   0  -3    0.32    0.13
   2   0   4   16.93    0.78
  -2   0  -4   17.61    0.80
  -2   0  -4   18.20    0.87
  -2   0  -5   -0.01    0.28
  -2   0  -5   -0.38    0.19
   2   0   5    0.21    0.25
   2   0   5    0.20    0.23
   2   0   5   -0.07    0.25
   2   0   6   27.23    1.24
   2   0   6   25.46    1.31
   2   0   6   25.83    1.15
  -2   0  -6   26.29    1.31
  -2   0  -6   26.97    1.21
   2   0   7    0.38    0.37
  -2   0  -7    0.06    0.42
  -2   0  -7   -0.39    0.31
   2   0   7   -0.42    0.40
   2   0   8   12.28    1.05
  -2   0  -8   11.29    0.99
   2   0   8   10.81    1.08
  -2   0  -9   -0.20    0.60
   2   0   9    0.39    0.64
   2   0  10    3.61    0.96
  -2   0 -10    1.56    0.78
   2   0  11    1.78    1.16
  -2   0 -11   -1.02    0.95
  -2   1  11    0.55    0.99
  -2   1  11   -0.81    0.83
   2   1 -11   -0.96    0.86
   2  -1 -11   -0.82    0.81
  -2  -1  11   -0.35    0.90
  -2  -1  11   -0.46    1.00
   2   1 -10    3.43    0.73
   2   1 -10    3.79    0.95
  -2   1  10    3.56    0.96
   2   1 -10    3.85    0.87
  -2   1  10    2.76    0.91
   2  -1 -10    5.49    1.33
   2  -1 -10    4.08    1.36
  -2  -1  10    3.42    0.91
   2  -1 -10    3.81    0.96
   2   1  -9    4.78    0.77
   2   1  -9    5.87    0.93
   2   1  -9    4.93    0.87
   2   1  -9    4.17    0.81
  -2   1   9    7.55    1.11
  -2   1   9    4.85    0.85
  -2  -1   9    6.17    1.06
   2  -1  -9    4.21    0.85
   2  -1  -9    4.73    0.71
   2  -1  -9    4.51    0.79
  -2  -1   9    3.27    0.85
   2  -1  -9    4.74    0.79
   2   1  -8    8.42    0.96
   2   1  -8    7.79    0.84
  -2   1   8    9.79    1.06
  -2   1   8    7.36    1.01
  -2   1   8    7.85    0.94
   2   1  -8    9.11    0.97
  -2  -1   8    8.19    1.07
   2  -1  -8    8.82    0.93
   2  -1  -8    8.28    0.92
  -2  -1   8    8.74    0.96
   2  -1  -8    8.85    0.95
  -2  -1   8    9.10    1.02
  -2   1   7    3.64    0.58
  -2   1   7    4.15    0.75
   2   1  -7    3.84    0.63
   2   1  -7    4.00    0.67
  -2   1   7    4.21    0.67
   2   1  -7    4.29    0.69
   2  -1  -7    3.60    0.62
  -2  -1   7    3.52    0.59
   2  -1  -7    4.80    0.70
  -2  -1   7    3.49    0.68
   2  -1  -7    3.40    0.60
  -2  -1   7    3.58    0.67
  -2   1   6   -0.31    0.26
   2   1  -6   -0.30    0.31
   2   1  -6    0.13    0.29
  -2   1   6   -0.12    0.40
  -2   1   6    0.05    0.37
   2   1  -6    0.06    0.31
   2  -1  -6    0.03    0.27
  -2  -1   6   -0.01    0.31
   2  -1  -6    0.49    0.33
  -2  -1   6    0.21    0.39
  -2  -1   6   -0.06    0.44
   2   1  -5    1.35    0.34
  -2   1   5    1.92    0.43
   2   1  -5    1.64    0.33
  -2   1   5    1.55    0.33
  -2   1   5    1.61    0.37
  -2  -1   5    1.67    0.36
   2  -1  -5    1.59    0.36
   2  -1  -5    1.97    0.37
  -2  -1   5    1.68    0.39
   2  -1  -5    1.88    0.31
  -2  -1   5    1.94    0.44
   2   1  -4    6.56    0.42
   2   1  -4    6.61    0.53
   2   1  -4    6.90    0.51
  -2   1   4    5.55    0.51
  -2   1   4    6.00    0.54
  -2   1   4    5.58    0.47
  -2  -1   4    5.92    0.55
   2  -1  -4    5.51    0.44
  -2  -1   4    6.39    0.50
   2  -1  -4    5.79    0.51
   2  -1  -4    5.94    0.48
  -2  -1   4    6.26    0.55
  -2   1   3    1.62    0.26
   2   1  -3    1.40    0.26
  -2   1   3    1.43    0.26
   2   1  -3    1.49    0.21
  -2   1   3    1.53    0.27
   2   1  -3    1.24    0.24
  -2  -1   3    1.71    0.29
   2  -1  -3    1.27    0.24
  -2  -1   3    1.25    0.25
  -2  -1   3    1.55    0.27
   2  -1  -3    1.46    0.21
   2   1  -2   99.99    2.97
   2   1  -2  100.31    2.86
  -2   1   2   97.63    2.96
  -2   1   2   98.26    2.97
   2   1  -2  102.85    3.00
  -2   1   2   99.49    2.92
  -2   1   2   99.41    2.95
   2   1  -2   98.95    2.95
   2  -1  -2   98.10    2.96
   2  -1  -2   97.39    2.96
   2  -1  -2   96.57    2.94
   2  -1  -2   99.80    2.91
  -2  -1   2  103.98    2.88
  -2  -1   2   99.41    3.01
  -2  -1   2  100.12    2.93
   2   1  -1  147.44    4.12
  -2   1   1  149.45    4.23
  -2   1   1  142.20    4.19
   2   1  -1  148.00    4.17
   2   1  -1  153.12    4.26
  -2   1   1  131.37    4.22
  -2   1   1  148.52    4.16
   2  -1  -1  149.13    4.23
   2  -1  -1  144.13    4.19
   2  -1  -1  150.72    4.15
  -2  -1   1  147.78    4.16
  -2  -1   1  150.04    4.26
  -2  -1   1  147.61    4.22
   2   1   0    5.75    0.39
   2   1   0    5.36    0.29
  -2   1   0    4.36    0.24
  -2   1   0    4.69    0.22
  -2   1   0    4.70    0.22
   2   1   0    4.68    0.24
  -2  -1   0    5.29    0.25
   2  -1   0    4.26    0.22
   2  -1   0    4.53    0.26
  -2   1  -1  158.40    4.37
  -2   1  -1  155.71    4.40
   2   1   1  143.31    4.43
   2   1   1  151.17    4.40
   2  -1   1  155.43    4.38
  -2  -1  -1  153.74    4.37
   2  -1   1  154.34    4.39
  -2  -1  -1  154.71    4.31
  -2   1  -2  249.55    7.08
   2   1   2  257.01    7.11
  -2   1  -2  246.74    7.12
  -2  -1  -2  252.87    7.08
   2  -1   2  240.75    7.10
   2  -1   2  246.90    7.10
  -2  -1  -2  248.48    7.12
   2   1   3   11.68    0.60
   2   1   3   12.60    0.62
   2   1   3   12.72    0.62
  -2   1  -3   13.44    0.61
  -2   1  -3   13.91    0.66
  -2  -1  -3   12.37    0.58
  -2  -1  -3   12.06    0.62
   2  -1   3   12.86    0.57
   2  -1   3   12.89    0.61
  -2   1  -4    3.34    0.38
   2   1   4    4.17    0.43
  -2   1  -4    3.53    0.42
   2   1   4    4.36    0.44
   2   1   4    4.62    0.42
  -2  -1  -4    3.91    0.39
  -2  -1  -4    4.28    0.43
   2  -1   4    3.82    0.41
   2  -1   4    4.49    0.42
   2  -1   4    3.60    0.37
   2   1   5    0.30    0.26
  -2   1  -5    0.05    0.24
   2   1   5    0.43    0.23
   2   1   5   -0.16    0.22
  -2   1  -5    0.55    0.28
   2  -1   5    0.11    0.23
  -2  -1  -5    0.06    0.25
   2  -1   5    0.10    0.24
   2  -1   5    0.33    0.24
  -2   1  -6   20.84    1.05
   2   1   6   19.80    1.00
   2   1   6   21.48    1.13
   2   1   6   20.03    1.06
  -2   1  -6   20.21    1.14
   2  -1   6   20.53    1.15
  -2  -1  -6   21.34    1.05
   2  -1   6   18.59    1.03
  -2  -1  -6   21.28    1.15
   2  -1   6   19.85    0.96
  -2   1  -7   30.79    1.53
   2   1   7   29.77    1.49
  -2   1  -7   30.78    1.41
   2   1   7   27.09    1.38
   2  -1   7   27.70    1.40
   2  -1   7   30.57    1.52
  -2  -1  -7   28.80    1.49
  -2  -1  -7   27.41    1.34
   2   1   8   11.95    1.06
  -2   1  -8    9.59    1.17
  -2   1  -8    9.43    0.90
   2   1   8    8.45    0.96
   2  -1   8   10.20    1.01
  -2  -1  -8    9.61    1.64
  -2  -1  -8    9.24    0.92
   2  -1   8   10.66    1.08
   2   1   9    2.10    0.74
  -2   1  -9    1.38    0.67
  -2   1  -9    0.46    0.67
   2  -1   9    0.47    0.68
  -2  -1  -9    1.65    0.65
  -2  -1  -9    0.91    0.63
  -2   1 -10    6.16    1.14
   2   1  10    6.93    1.16
  -2  -1 -10    8.87    1.37
   2  -1  10    7.31    1.21
  -2   1 -11    2.42    1.02
   2   1  11    2.04    1.17
   2  -1  11    1.05    1.15
  -2   2  11    6.43    1.25
  -2   2  11    7.93    1.26
   2   2 -11    6.89    1.22
  -2  -2  11    5.20    1.25
   2  -2 -11    6.26    1.16
  -2  -2  11    9.72    1.62
  -2   2  10    7.85    1.14
   2   2 -10    6.16    1.08
   2   2 -10    8.51    1.12
   2   2 -10    4.83    0.82
  -2   2  10    4.36    1.00
   2  -2 -10    9.30    1.38
   2  -2 -10    7.54    1.11
  -2  -2  10    6.93    1.05
   2  -2 -10    5.33    0.91
   2  -2 -10    9.69    1.32
   2   2  -9    6.70    0.90
   2   2  -9    4.88    0.84
  -2   2   9    5.97    0.95
   2   2  -9    6.49    1.05
   2   2  -9    7.87    0.95
  -2   2   9    7.34    1.14
   2  -2  -9    6.20    1.00
   2  -2  -9    5.93    0.91
   2  -2  -9    5.74    0.78
  -2  -2   9    7.00    1.10
   2  -2  -9    6.83    1.05
  -2  -2   9    6.95    1.02
  -2   2   8    1.84    0.58
   2   2  -8    1.35    0.55
   2   2  -8    2.12    0.52
  -2   2   8    1.69    0.61
   2   2  -8    1.79    0.53
  -2   2   8    2.07    0.59
  -2  -2   8    1.62    0.63
  -2  -2   8    1.36    0.64
   2  -2  -8    1.73    0.62
   2  -2  -8    1.83    0.49
   2  -2  -8    1.40    0.53
  -2  -2   8    1.64    0.60
   2  -2  -8    0.98    0.60
  -2   2   7    1.79    0.53
   2   2  -7    0.75    0.46
   2   2  -7    1.17    0.46
  -2   2   7    1.30    0.42
   2   2  -7    1.05    0.51
  -2   2   7    1.26    0.53
   2  -2  -7    1.44    0.45
   2  -2  -7    1.16    0.49
  -2  -2   7    1.16    0.55
  -2  -2   7    0.91    0.44
  -2  -2   7    1.02    0.58
   2  -2  -7    1.53    0.47
   2   2  -6    1.89    0.37
   2   2  -6    1.48    0.39
  -2   2   6    0.90    0.32
  -2   2   6    1.12    0.45
  -2   2   6    1.79    0.51
   2   2  -6    1.56    0.46
   2  -2  -6    1.74    0.42
  -2  -2   6    1.10    0.48
   2  -2  -6    1.42    0.43
  -2  -2   6    2.13    0.47
  -2  -2   6    1.48    0.48
   2  -2  -6    1.40    0.37
   2   2  -5    0.08    0.25
  -2   2   5    0.32    0.34
  -2   2   5    0.12    0.26
   2   2  -5    0.28    0.30
  -2   2   5   -0.04    0.20
   2  -2  -5    0.02    0.23
  -2  -2   5    0.36    0.28
   2  -2  -5    0.38    0.29
   2  -2  -5    0.23    0.24
  -2  -2   5    0.46    0.32
  -2  -2   5    0.63    0.38
   2  -2  -5    0.01    0.21
  -2   2   4   35.32    1.34
   2   2  -4   35.77    1.35
   2   2  -4   35.63    1.18
  -2   2   4   33.86    1.32
   2   2  -4   35.69    1.36
  -2   2   4   32.90    1.29
  -2  -2   4   35.74    1.34
   2  -2  -4   35.36    1.26
  -2  -2   4   34.08    1.34
  -2  -2   4   34.42    1.37
   2  -2  -4   34.05    1.30
   2  -2  -4   34.97    1.31
   2   2  -3   32.71    1.22
  -2   2   3   32.62    1.19
   2   2  -3   33.43    1.05
  -2   2   3   32.94    1.21
  -2   2   3   32.48    1.16
   2  -2  -3   33.41    1.22
   2  -2  -3   32.38    1.17
  -2  -2   3   32.39    1.23
   2  -2  -3   33.13    1.14
   2  -2  -3   32.30    1.17
  -2  -2   3   33.19    1.17
  -2  -2   3   31.81    1.20
   2   2  -2  429.82   12.74
  -2   2   2  469.06   13.06
   2   2  -2  457.42   12.75
  -2   2   2  470.56   13.08
  -2   2   2  476.07   13.08
   2   2  -2  429.88   12.78
  -2   2   2  439.56   12.73
  -2  -2   2  425.73   13.02
   2  -2  -2  467.32   13.15
  -2  -2   2  431.19   12.78
   2  -2  -2  470.39   12.99
  -2  -2   2  457.27   12.75
   2  -2  -2  458.16   12.96
   2  -2  -2  459.54   12.97
  -2   2   1   14.04    0.54
   2   2  -1   13.90    0.60
   2   2  -1   13.74    0.50
  -2   2   1   13.74    0.51
  -2   2   1   14.22    0.55
  -2   2   1   12.67    0.58
  -2  -2   1   13.76    0.48
   2  -2  -1   15.06    0.53
   2  -2  -1   13.86    0.54
   2  -2  -1   14.25    0.49
   2  -2  -1   13.85    0.53
  -2  -2   1   13.52    0.56
   2   2   0   40.83    1.25
   2   2   0   38.42    1.19
  -2   2   0   40.12    1.16
  -2   2   0   39.36    1.19
  -2   2   0   34.78    1.20
  -2  -2   0   40.99    1.20
   2  -2   0   40.80    1.20
  -2  -2   0   37.68    1.24
   2  -2   0   37.45    1.20
  -2   2  -1    0.48    0.12
  -2   2  -1    0.73    0.12
   2   2   1    0.61    0.13
   2   2   1    0.76    0.12
   2  -2   1    0.53    0.11
  -2  -2  -1    0.55    0.12
  -2  -2  -1    0.87    0.15
  -2  -2  -1    0.71    0.12
   2  -2   1    0.45    0.10
  -2   2  -2   22.52    0.80
  -2   2  -2   24.55    0.86
   2  -2   2   19.70    0.82
   2  -2   2   22.01    0.82
  -2   2  -3   11.97    0.58
  -2   2  -3   12.18    0.63
   2   2   3   11.99    0.62
   2   2   3   11.99    0.58
   2   2   3   12.24    0.60
   2  -2   3   11.28    0.60
  -2  -2  -3   12.35    0.57
  -2  -2  -3   11.96    0.62
   2  -2   3   11.89    0.59
  -2   2  -4    4.77    0.42
   2   2   4    3.77    0.40
  -2   2  -4    4.34    0.47
   2   2   4    4.70    0.44
   2   2   4    4.40    0.45
   2  -2   4    4.24    0.37
   2  -2   4    4.05    0.43
   2  -2   4    4.04    0.43
  -2  -2  -4    4.15    0.37
  -2  -2  -4    4.11    0.44
  -2   2  -5    2.35    0.41
   2   2   5    2.52    0.44
   2   2   5    1.85    0.36
   2   2   5    2.85    0.42
  -2   2  -5    3.44    0.45
   2  -2   5    2.53    0.43
   2  -2   5    2.66    0.37
   2  -2   5    2.07    0.40
  -2  -2  -5    2.77    0.41
  -2  -2  -5    3.19    0.48
   2   2   6   -0.04    0.33
   2   2   6    0.41    0.27
  -2   2  -6    0.55    0.30
   2   2   6    0.22    0.33
  -2   2  -6    0.47    0.36
   2  -2   6   -0.33    0.30
  -2  -2  -6    0.21    0.30
  -2  -2  -6    0.47    0.31
   2  -2   6    0.45    0.28
   2   2   7   57.24    2.24
   2   2   7   59.37    2.23
  -2   2  -7   59.07    2.27
   2   2   7   61.06    2.35
  -2   2  -7   61.35    2.40
   2  -2   7   58.96    2.38
  -2  -2  -7   61.47    2.38
   2  -2   7   57.08    2.28
  -2  -2  -7   60.44    2.23
  -2   2  -8   20.04    1.26
   2   2   8   19.52    1.28
   2   2   8   19.25    1.33
  -2   2  -8   19.11    1.38
   2  -2   8   17.75    1.25
  -2  -2  -8   18.98    1.34
   2  -2   8   20.91    1.38
  -2  -2  -8   19.08    1.19
   2   2   9    0.42    0.87
   2  -2   9   -0.70    0.62
  -2  -2  -9    0.85    0.60
  -2   2 -10    1.34    0.87
   2   2  10    1.07    0.93
  -2  -2 -10    3.51    0.90
   2  -2  10    3.13    1.03
   2   2  11    3.25    1.24
  -2   2 -11    2.43    1.05
   2  -2  11    3.13    1.21
  -2  -2 -11    2.33    1.10
  -2   3  11   11.00    1.78
  -2   3  11   15.61    1.82
   2  -3 -11   12.27    1.55
  -2  -3  11   12.42    1.67
  -2  -3  11   11.00    1.53
   2   3 -10    5.45    0.80
   2   3 -10    6.11    1.07
  -2   3  10    4.56    0.94
   2   3 -10    4.65    1.01
   2  -3 -10    4.85    0.94
   2  -3 -10    4.55    0.94
  -2  -3  10    4.62    1.01
   2  -3 -10    3.83    0.91
  -2  -3  10    5.54    1.01
   2   3  -9   12.74    1.00
   2   3  -9   12.09    1.02
   2   3  -9   12.35    1.33
   2   3  -9   10.99    1.30
  -2   3   9   11.99    1.30
  -2   3   9   10.37    1.13
   2  -3  -9    9.45    1.18
   2  -3  -9   12.03    1.12
   2  -3  -9   10.57    1.17
   2  -3  -9    9.71    1.16
  -2  -3   9    9.84    1.23
   2   3  -8   11.65    1.10
  -2   3   8   12.21    1.08
   2   3  -8   12.38    1.12
   2   3  -8   10.15    0.86
  -2   3   8   10.66    1.04
  -2   3   8   10.24    1.19
  -2  -3   8   10.11    1.10
   2  -3  -8   10.99    1.32
   2  -3  -8   11.83    0.97
   2  -3  -8   10.72    1.04
  -2  -3   8   11.40    1.13
   2  -3  -8   10.40    0.97
  -2  -3   8   10.14    1.07
  -2   3   7    0.15    0.35
  -2   3   7    0.15    0.49
   2   3  -7    0.22    0.37
   2   3  -7    0.27    0.47
   2   3  -7    0.43    0.43
  -2   3   7    0.46    0.44
   2  -3  -7    1.06    0.40
  -2  -3   7    0.31    0.48
   2  -3  -7    0.54    0.42
  -2  -3   7    0.71    0.56
   2  -3  -7    0.64    0.39
   2  -3  -7    0.48    0.43
  -2  -3   7    0.55    0.44
  -2   3   6   34.22    1.52
  -2   3   6   35.79    1.48
   2   3  -6   34.36    1.36
   2   3  -6   36.80    1.60
   2   3  -6   33.95    1.51
  -2   3   6   35.40    1.54
  -2  -3   6   34.99    1.58
   2  -3  -6   37.35    1.46
   2  -3  -6   35.77    1.47
   2  -3  -6   36.04    1.51
   2  -3  -6   35.19    1.50
  -2  -3   6   34.04    1.53
   2   3  -5    2.67    0.46
  -2   3   5    1.90    0.40
  -2   3   5    2.17    0.38
  -2   3   5    1.81    0.38
   2   3  -5    2.12    0.45
  -2  -3   5    2.00    0.41
   2  -3  -5    1.95    0.34
   2  -3  -5    2.32    0.36
   2  -3  -5    2.06    0.37
   2  -3  -5    1.83    0.40
  -2  -3   5    2.49    0.42
   2   3  -4   11.56    0.68
   2   3  -4   11.30    0.50
  -2   3   4   10.71    0.65
  -2   3   4    9.88    0.58
  -2   3   4   10.46    0.65
   2  -3  -4   10.84    0.61
  -2  -3   4   10.84    0.70
  -2  -3   4   10.36    0.66
   2  -3  -4   10.30    0.61
   2  -3  -4   10.81    0.62
   2   3  -3    0.28    0.11
  -2   3   3   -0.29    0.17
  -2   3   3   -0.08    0.14
   2   3  -3    0.50    0.21
  -2  -3   3    0.33    0.22
   2  -3  -3    0.07    0.23
  -2  -3   3    0.43    0.23
   2  -3  -3    0.15    0.15
   2  -3  -3    0.09    0.15
  -2  -3   3    0.17    0.18
   2  -3  -3    0.35    0.17
  -2   3   2  105.88    3.16
  -2   3   2  107.91    3.19
   2   3  -2  105.01    3.21
  -2   3   2  108.65    3.20
   2   3  -2  107.50    3.25
  -2   3   2  105.34    3.17
   2  -3  -2  107.68    3.20
   2  -3  -2  110.68    3.18
  -2  -3   2  110.26    3.27
   2  -3  -2  109.07    3.17
   2  -3  -2  105.12    3.14
  -2  -3   2  109.54    3.06
  -2   3   1    0.98    0.18
  -2   3   1    0.99    0.15
  -2   3   1    1.24    0.22
  -2   3   1    0.96    0.15
  -2   3   1    1.05    0.15
   2   3  -1    0.77    0.21
   2   3  -1    0.74    0.15
   2   3  -1    0.69    0.21
   2  -3  -1    0.99    0.17
  -2  -3   1    0.90    0.23
  -2  -3   1    0.66    0.19
   2  -3  -1    1.15    0.19
  -2  -3   1    0.85    0.12
   2  -3  -1    1.12    0.17
   2  -3  -1    0.79    0.16
  -2   3   0  451.61   13.38
   2   3   0  450.01   13.55
  -2   3   0  461.02   13.47
   2   3   0  534.88   14.63
  -2   3   0  470.03   13.40
   2   3   0  497.22   13.62
   2   3   0  461.77   13.57
   2  -3   0  488.04   13.47
   2  -3   0  457.88   13.44
  -2  -3   0  440.72   13.32
  -2   3  -1   13.02    0.39
   2   3   1   12.30    0.47
   2   3   1   11.25    0.49
  -2   3  -1   13.00    0.47
  -2   3  -1   12.35    0.49
  -2  -3  -1   11.80    0.47
  -2  -3  -1   11.78    0.47
   2  -3   1   13.01    0.48
   2  -3   1   12.75    0.48
  -2  -3  -1   11.69    0.50
   2   3   2  589.01   15.95
  -2   3  -2  571.12   15.78
  -2   3  -2  570.60   15.95
   2   3   2  565.76   16.03
   2   3   2  535.47   15.69
   2  -3   2  524.27   15.64
  -2  -3  -2  585.75   16.07
   2  -3   2  518.24   15.64
   2   3   3    6.52    0.49
   2   3   3    6.53    0.41
  -2   3  -3    6.01    0.44
   2   3   3    6.41    0.42
  -2   3  -3    6.34    0.42
  -2  -3  -3    6.32    0.43
  -2  -3  -3    6.46    0.39
   2  -3   3    6.10    0.44
   2  -3   3    6.00    0.36
   2   3   4   80.86    2.64
   2   3   4   83.72    2.67
  -2   3  -4   82.57    2.63
   2   3   4   79.86    2.61
  -2   3  -4   81.64    2.69
   2  -3   4   81.83    2.68
   2  -3   4   81.03    2.64
  -2  -3  -4   81.20    2.66
  -2  -3  -4   83.89    2.59
   2  -3   4   80.27    2.48
   2   3   5    0.16    0.24
  -2   3  -5    0.07    0.24
  -2   3  -5   -0.15    0.27
   2   3   5    0.22    0.26
   2   3   5    0.19    0.21
  -2  -3  -5   -0.25    0.20
   2  -3   5   -0.20    0.18
  -2  -3  -5   -0.02    0.24
   2  -3   5   -0.12    0.26
   2  -3   5    0.17    0.29
   2   3   6    6.78    0.66
   2   3   6    4.81    0.63
  -2   3  -6    6.30    0.72
   2   3   6    5.55    0.60
  -2   3  -6    6.62    0.64
  -2  -3  -6    6.01    0.67
   2  -3   6    5.66    0.64
   2  -3   6    4.39    0.67
  -2  -3  -6    6.54    0.57
   2   3   7   -0.38    0.40
   2   3   7    0.18    0.35
  -2   3  -7    0.12    0.38
  -2   3  -7    0.13    0.40
   2   3   7   -0.13    0.37
  -2  -3  -7   -0.19    0.33
   2  -3   7   -0.12    0.46
   2  -3   7    0.26    0.42
  -2  -3  -7    0.26    0.44
   2   3   8    2.31    0.63
  -2   3  -8    1.37    0.62
  -2   3  -8    1.82    0.53
   2  -3   8    2.39    0.60
   2  -3   8    1.11    0.52
  -2  -3  -8    1.65    0.53
  -2  -3  -8    0.73    0.48
  -2   3  -9    2.25    0.72
   2   3   9    0.41    0.81
  -2  -3  -9    0.34    0.58
   2  -3   9    1.83    0.80
  -2  -3  -9    1.43    0.67
  -2   3 -10    0.00    0.81
   2   3  10    1.37    0.86
  -2  -3 -10    2.73    0.84
   2  -3  10    2.19    0.96
   2   3  11    1.12    1.19
   2   3  11    5.81    1.33
  -2   3 -11    2.52    1.07
   2  -3  11    1.54    1.14
  -2  -3 -11    2.83    1.06
  -2   4  11    0.07    0.90
  -2   4  11    0.86    0.97
  -2  -4  11   -0.07    0.96
   2  -4 -11   -0.57    0.82
  -2  -4  11    0.80    1.15
   2   4 -10    2.30    0.82
  -2   4  10    0.33    0.74
  -2   4  10    2.11    0.86
   2   4 -10    1.44    0.65
   2   4 -10    3.30    0.89
  -2  -4  10    2.97    0.93
   2  -4 -10    2.48    0.86
   2  -4 -10    0.55    0.71
  -2  -4  10    1.63    0.85
  -2   4   9    2.35    0.76
   2   4  -9    2.97    0.82
   2   4  -9    2.39    0.76
   2   4  -9    2.74    0.61
  -2   4   9    1.60    0.71
  -2  -4   9    2.87    0.86
   2  -4  -9    1.67    0.68
   2  -4  -9    2.00    0.69
  -2  -4   9    2.05    0.77
   2  -4  -9    2.72    0.68
   2  -4  -9    2.65    0.76
   2   4  -8    2.56    0.65
  -2   4   8    2.50    0.59
   2   4  -8    1.93    0.72
  -2   4   8    1.22    0.58
   2  -4  -8    2.63    0.74
   2  -4  -8    2.75    0.55
  -2  -4   8    2.19    0.65
  -2  -4   8    3.29    0.71
  -2  -4   8    3.39    0.73
   2  -4  -8    1.67    0.53
   2  -4  -8    2.86    0.98
  -2   4   7   -0.20    0.42
   2   4  -7    0.43    0.47
   2   4  -7    0.50    0.36
  -2   4   7    0.08    0.38
   2   4  -7    0.45    0.45
  -2   4   7    0.19    0.48
   2  -4  -7    0.11    0.36
   2  -4  -7    0.18    0.47
   2  -4  -7    1.02    0.44
  -2  -4   7    0.11    0.46
  -2  -4   7    0.43    0.42
   2  -4  -7    0.34    0.38
   2   4  -6    0.18    0.39
  -2   4   6   -0.11    0.41
   2   4  -6    0.38    0.31
  -2   4   6   -0.08    0.30
  -2   4   6    0.25    0.28
   2  -4  -6    0.42    0.29
  -2  -4   6    0.91    0.38
   2  -4  -6    0.27    0.35
   2  -4  -6    0.05    0.33
  -2  -4   6   -0.27    0.36
   2  -4  -6    0.54    0.32
   2   4  -5   37.85    1.54
  -2   4   5   37.30    1.47
  -2   4   5   35.00    1.41
  -2   4   5   36.98    1.48
   2   4  -5   35.44    1.52
  -2  -4   5   36.80    1.51
  -2  -4   5   36.96    1.54
   2  -4  -5   38.43    1.44
   2  -4  -5   37.15    1.44
   2  -4  -5   37.17    1.42
  -2   4   4    3.70    0.47
   2   4  -4    3.13    0.29
  -2   4   4    3.70    0.42
   2   4  -4    3.25    0.44
  -2   4   4    2.98    0.36
   2  -4  -4    3.83    0.37
  -2  -4   4    3.48    0.44
  -2  -4   4    3.82    0.50
   2  -4  -4    3.84    0.44
   2  -4  -4    3.59    0.41
  -2   4   3   53.81    1.76
  -2   4   3   54.17    1.80
   2   4  -3   55.36    1.60
   2   4  -3   56.23    1.84
   2   4  -3   55.36    1.85
  -2   4   3   53.55    1.75
   2  -4  -3   53.87    1.78
   2  -4  -3   54.31    1.83
  -2  -4   3   53.37    1.84
   2  -4  -3   56.04    1.76
   2  -4  -3   55.19    1.76
  -2  -4   3   53.84    1.87
  -2   4   2    0.14    0.18
   2   4  -2    0.14    0.16
  -2   4   2    0.06    0.14
  -2   4   2   -0.02    0.12
   2   4  -2    0.15    0.16
  -2   4   2    0.10    0.17
  -2  -4   2    0.15    0.17
   2  -4  -2    0.25    0.13
   2  -4  -2   -0.02    0.16
   2  -4  -2    0.28    0.16
   2  -4  -2   -0.02    0.12
   2  -4  -2   -0.01    0.13
  -2  -4   2    0.00    0.20
   2   4  -1    4.96    0.41
  -2   4   1    5.84    0.31
   2   4  -1    5.04    0.40
  -2   4   1    5.82    0.37
  -2   4   1    5.61    0.28
  -2  -4   1    5.36    0.25
   2  -4  -1    5.72    0.31
   2  -4  -1    5.80    0.34
   2  -4  -1    5.53    0.31
  -2  -4   1    5.50    0.37
  -2  -4   1    5.80    0.44
   2  -4  -1    5.95    0.35
   2   4   0   38.32    1.20
  -2   4   0   35.61    1.14
  -2   4   0   37.29    1.18
   2   4   0   41.79    1.44
   2   4   0   35.49    1.19
   2   4   0   37.59    1.26
  -2   4   0   39.52    1.13
  -2  -4   0   37.89    1.24
   2  -4   0   38.93    1.18
  -2  -4   0   36.87    1.20
   2  -4   0   38.82    1.15
   2   4   1  246.54    7.26
   2   4   1  263.14    7.23
  -2   4  -1  274.84    7.23
  -2   4  -1  249.88    7.24
  -2   4  -1  251.77    7.21
  -2  -4  -1  248.78    7.22
  -2  -4  -1  248.59    7.26
   2  -4   1  254.32    7.23
   2  -4   1  249.47    7.23
  -2  -4  -1  273.09    7.30
   2   4   2  172.46    4.99
  -2   4  -2  170.31    4.97
  -2   4  -2  170.39    4.90
   2   4   2  164.84    4.90
   2   4   2  177.63    4.91
  -2  -4  -2  167.52    4.87
   2  -4   2  164.62    4.91
   2  -4   2  170.91    4.93
  -2  -4  -2  168.25    4.92
  -2  -4  -2  167.90    4.86
  -2   4  -3   90.85    2.77
   2   4   3   85.83    2.74
   2   4   3   87.16    2.82
   2   4   3   89.72    2.76
  -2   4  -3   92.43    2.83
   2  -4   3   89.32    2.78
  -2  -4  -3   89.71    2.72
   2  -4   3   89.88    2.80
  -2  -4  -3   90.00    2.79
   2  -4   3   89.60    2.62
   2   4   4   43.72    1.57
  -2   4  -4   41.88    1.56
  -2   4  -4   43.83    1.61
   2   4   4   43.86    1.60
   2   4   4   40.06    1.64
   2  -4   4   43.00    1.60
   2  -4   4   41.15    1.61
  -2  -4  -4   43.64    1.58
  -2  -4  -4   45.24    1.51
  -2   4  -5   49.10    1.85
  -2   4  -5   44.68    1.73
   2   4   5   48.27    1.79
   2   4   5   47.90    1.74
   2   4   5   47.90    1.78
  -2  -4  -5   46.97    1.77
  -2  -4  -5   49.12    1.82
   2  -4   5   46.73    1.55
  -2  -4  -5   47.26    1.70
   2  -4   5   46.64    1.80
   2  -4   5   46.89    1.80
  -2   4  -6    8.67    0.78
   2   4   6    7.93    0.73
  -2   4  -6    7.53    0.69
   2   4   6    7.88    0.68
   2   4   6    7.57    0.72
  -2  -4  -6    7.80    0.72
   2  -4   6    6.48    0.72
  -2  -4  -6    6.80    0.60
   2  -4   6    7.97    0.69
   2   4   7   11.70    1.09
   2   4   7   11.34    0.91
  -2   4  -7   10.93    0.90
   2   4   7   10.80    0.93
  -2   4  -7   12.77    1.02
   2  -4   7   11.77    1.04
  -2  -4  -7   11.10    0.84
   2  -4   7   11.22    0.97
  -2  -4  -7   12.16    0.96
  -2   4  -8   11.99    1.07
   2   4   8    9.71    1.10
  -2   4  -8   12.15    1.10
   2  -4   8   11.60    1.26
  -2  -4  -8   11.88    0.93
  -2  -4  -8   10.65    1.03
   2  -4   8    9.16    0.99
  -2   4  -9    4.49    0.86
   2   4   9    4.63    0.90
   2  -4   9    6.15    1.01
  -2  -4  -9    4.52    0.81
  -2  -4  -9    3.65    0.78
  -2   4 -10    3.78    1.00
   2   4  10    1.89    0.89
   2  -4  10    3.19    0.96
  -2  -4 -10    4.76    0.94
   2   4  11   -0.13    1.26
   2   4  11    1.15    1.17
  -2   4 -11    2.15    1.02
   2  -4  11    1.60    1.19
  -2   5  11    2.90    0.94
  -2   5  11    0.45    0.95
  -2  -5  11   -1.31    1.01
  -2  -5  11    0.57    0.97
   2  -5 -11    1.90    0.87
   2   5 -10    0.98    0.83
   2   5 -10    0.33    0.59
  -2   5  10    0.50    0.77
  -2   5  10    2.37    0.82
   2  -5 -10    0.08    0.94
  -2  -5  10    0.44    0.94
   2  -5 -10   -0.14    0.72
   2  -5 -10   -0.94    0.65
  -2  -5  10   -0.61    0.75
  -2   5   9    6.91    1.07
   2   5  -9    4.16    0.90
   2   5  -9    6.64    1.12
   2   5  -9    6.39    0.84
  -2   5   9    6.90    1.10
  -2  -5   9    6.81    1.01
  -2  -5   9    6.49    1.11
   2  -5  -9    4.52    0.83
   2  -5  -9    6.43    1.10
   2  -5  -9    5.95    0.86
   2  -5  -9    5.75    0.82
   2   5  -8    3.62    0.73
  -2   5   8    4.59    0.74
  -2   5   8    4.79    0.79
   2   5  -8    5.71    0.93
   2   5  -8    4.04    0.58
  -2   5   8    4.61    1.19
  -2  -5   8    2.86    0.73
  -2  -5   8    2.56    0.70
   2  -5  -8    4.14    0.78
   2  -5  -8    4.50    0.67
   2  -5  -8    4.15    0.68
   2   5  -7    8.09    0.96
  -2   5   7    6.97    0.81
   2   5  -7    6.89    0.62
  -2   5   7    8.03    0.92
  -2   5   7    7.11    0.85
   2   5  -7    6.41    0.83
  -2  -5   7    8.62    0.87
   2  -5  -7    6.87    0.82
   2  -5  -7    7.31    0.84
   2  -5  -7    7.63    0.84
  -2  -5   7    8.34    0.93
   2  -5  -7    6.52    0.73
   2   5  -6    0.23    0.34
  -2   5   6    0.07    0.28
  -2   5   6   -0.17    0.31
  -2   5   6    0.05    0.41
   2   5  -6    0.37    0.44
   2  -5  -6   -0.17    0.31
   2  -5  -6    0.02    0.31
   2  -5  -6    0.11    0.25
  -2  -5   6    0.22    0.43
  -2  -5   6    0.01    0.33
   2  -5  -6    0.57    0.40
  -2   5   5    0.00    0.22
   2   5  -5   -0.16    0.29
  -2   5   5   -0.23    0.29
   2   5  -5    0.35    0.32
  -2   5   5    0.41    0.27
  -2  -5   5   -0.13    0.34
   2  -5  -5   -0.16    0.30
  -2  -5   5    0.02    0.29
   2  -5  -5   -0.22    0.24
   2  -5  -5   -0.11    0.22
   2   5  -4    1.99    0.35
  -2   5   4    1.31    0.30
  -2   5   4    0.92    0.29
  -2   5   4    1.58    0.28
   2   5  -4    1.41    0.24
   2  -5  -4    1.94    0.40
   2  -5  -4    1.47    0.30
  -2  -5   4    1.58    0.38
   2  -5  -4    1.71    0.28
   2  -5  -4    1.56    0.28
  -2   5   3   30.07    1.12
  -2   5   3   28.64    1.05
   2   5  -3   29.46    1.16
   2   5  -3   30.17    0.89
   2   5  -3   29.64    1.14
  -2   5   3   29.09    1.06
   2  -5  -3   28.83    1.14
   2  -5  -3   29.93    1.06
   2  -5  -3   30.23    1.05
   2  -5  -3   30.07    1.11
  -2  -5   3   30.24    1.17
  -2  -5   3   29.98    1.19
  -2   5   2  305.52    8.54
   2   5  -2  306.72    8.63
  -2   5   2  326.89    8.78
  -2   5   2  302.47    8.60
  -2   5   2  297.10    8.63
  -2   5   2  296.86    8.52
   2   5  -2  298.33    8.66
   2  -5  -2  305.36    8.61
  -2  -5   2  301.13    8.64
   2  -5  -2  306.28    8.53
   2  -5  -2  305.05    8.56
   2  -5  -2  289.09    8.50
  -2  -5   2  300.24    8.67
   2  -5  -2  293.75    8.61
   2   5  -1    2.74    0.12
   2   5  -1    2.66    0.33
   2   5  -1    2.73    0.28
  -2   5   1    2.37    0.24
  -2   5   1    2.24    0.28
  -2   5   1    2.43    0.19
   2  -5  -1    2.73    0.29
   2  -5  -1    2.82    0.21
   2  -5  -1    2.11    0.26
  -2  -5   1    2.88    0.30
  -2  -5   1    3.11    0.35
   2  -5  -1    2.22    0.23
  -2  -5   1    2.47    0.17
   2   5   0    0.22    0.16
  -2   5   0    0.21    0.12
   2   5   0    0.36    0.13
   2   5   0    0.19    0.15
  -2   5   0    0.10    0.14
  -2   5   0    0.15    0.06
  -2  -5   0    0.29    0.14
   2  -5   0    0.17    0.07
  -2  -5   0    0.41    0.15
   2  -5   0    0.16    0.11
   2  -5   0    0.14    0.12
  -2  -5   0    0.72    0.32
  -2  -5   0    0.56    0.16
   2   5   1   17.71    0.68
  -2   5  -1   17.57    0.62
  -2   5  -1   17.27    0.64
   2   5   1   18.51    0.66
  -2   5  -1   18.74    0.59
   2  -5   1   17.25    0.59
   2  -5   1   17.78    0.64
  -2  -5  -1   17.47    0.65
  -2  -5  -1   17.39    0.66
   2  -5   1   16.35    0.62
  -2  -5  -1   18.15    0.64
   2   5   2   59.53    1.82
  -2   5  -2   58.53    1.83
   2   5   2   58.60    1.93
   2   5   2   57.86    1.83
   2  -5   2   56.14    1.83
  -2  -5  -2   59.26    1.80
   2  -5   2   58.14    1.85
  -2  -5  -2   58.39    1.85
  -2  -5  -2   59.42    1.81
   2   5   3   11.81    0.57
   2   5   3   12.36    0.68
  -2   5  -3   12.17    0.65
   2   5   3   12.74    0.61
  -2   5  -3   12.18    0.61
   2  -5   3   11.52    0.62
  -2  -5  -3   12.50    0.56
   2  -5   3   11.35    0.61
  -2   5  -4    0.64    0.26
   2   5   4    0.44    0.27
   2   5   4    0.37    0.23
   2   5   4    0.33    0.20
   2  -5   4    0.21    0.14
   2  -5   4    0.11    0.20
  -2  -5  -4    0.32    0.21
  -2  -5  -4    0.46    0.29
  -2  -5  -4    0.20    0.18
   2  -5   4    0.28    0.23
  -2   5  -5    5.01    0.60
   2   5   5    5.24    0.52
   2   5   5    6.07    0.60
   2   5   5    5.54    0.55
  -2   5  -5    5.40    0.52
  -2  -5  -5    6.35    0.65
   2  -5   5    3.76    0.60
  -2  -5  -5    4.68    0.55
  -2  -5  -5    5.58    0.48
   2  -5   5    4.57    0.55
   2   5   6    0.44    0.42
  -2   5  -6    0.49    0.34
  -2   5  -6    0.25    0.33
   2   5   6   -0.12    0.35
   2   5   6    0.54    0.31
  -2  -5  -6    0.89    0.44
   2  -5   6   -0.15    0.32
  -2  -5  -6   -0.01    0.32
   2  -5   6    0.55    0.34
  -2  -5  -6    0.10    0.27
  -2   5  -7    6.88    0.93
  -2   5  -7    7.95    0.78
   2   5   7    7.62    0.86
   2   5   7    6.52    0.79
   2   5   7    7.77    0.81
   2  -5   7    7.07    0.86
   2  -5   7    7.93    0.84
  -2  -5  -7    7.88    0.87
  -2  -5  -7    8.88    0.74
   2   5   8    2.88    0.69
  -2   5  -8    2.62    0.62
   2   5   8    1.66    0.61
  -2   5  -8    3.42    0.72
   2  -5   8    2.40    0.67
   2  -5   8    2.07    1.03
  -2  -5  -8    1.81    0.54
  -2  -5  -8    2.29    0.58
  -2   5  -9    1.87    0.75
   2   5   9    3.19    0.79
  -2  -5  -9    3.04    0.77
   2  -5   9    2.78    0.87
  -2  -5  -9    2.53    0.66
  -2   5 -10    1.72    0.90
   2   5  10    3.22    0.94
   2   5  10    0.84    0.99
   2  -5  10    0.99    0.91
  -2   5 -11    1.42    1.01
   2   5  11    0.08    1.09
  -2  -5 -11   -1.65    0.92
   2  -5  11    0.92    1.11
  -2   6  11   -0.99    0.98
  -2   6  11    2.72    0.93
   2  -6 -11    0.79    0.91
  -2  -6  11    0.62    0.95
  -2  -6  11   -1.69    1.10
   2   6 -10    2.40    0.64
   2   6 -10    2.89    0.87
  -2   6  10    1.13    0.87
  -2   6  10    2.89    0.86
  -2  -6  10    2.94    0.99
   2  -6 -10    2.86    0.79
   2  -6 -10    3.00    0.84
  -2  -6  10    4.11    1.01
  -2   6   9    5.26    0.89
   2   6  -9    3.70    0.56
  -2   6   9    4.65    0.83
   2   6  -9    4.33    0.91
  -2  -6   9    6.75    1.15
   2  -6  -9    4.50    0.76
  -2  -6   9    3.83    0.85
   2  -6  -9    4.57    0.82
   2  -6  -9    5.19    0.98
   2  -6  -9    3.66    0.78
  -2   6   8   23.52    1.38
   2   6  -8   21.54    1.08
   2   6  -8   23.87    1.43
  -2   6   8   19.27    1.33
  -2   6   8   23.79    1.40
   2   6  -8   21.66    1.45
   2  -6  -8   21.39    1.27
   2  -6  -8   22.18    1.42
   2  -6  -8   21.88    1.35
  -2  -6   8   22.14    1.49
  -2  -6   8   18.90    1.42
  -2   6   7    0.08    0.37
  -2   6   7    0.90    0.56
   2   6  -7    0.18    0.45
   2   6  -7    0.08    0.43
  -2   6   7    0.32    0.43
   2   6  -7    0.23    0.31
   2  -6  -7    0.14    0.37
  -2  -6   7    0.66    0.54
   2  -6  -7    0.45    0.43
   2  -6  -7   -0.40    0.48
   2  -6  -7   -0.50    0.38
  -2  -6   7    0.45    0.45
   2   6  -6    1.42    0.47
  -2   6   6    0.28    0.29
   2   6  -6    0.80    0.37
  -2   6   6    0.56    0.42
  -2   6   6    0.50    0.37
  -2  -6   6    0.48    0.36
   2  -6  -6    0.26    0.27
  -2  -6   6    0.43    0.46
   2  -6  -6    0.18    0.30
   2  -6  -6    0.49    0.39
   2  -6  -6    0.46    0.41
  -2   6   5   12.81    0.73
  -2   6   5   13.76    0.84
   2   6  -5   13.21    0.82
  -2   6   5   13.57    0.78
  -2  -6   5   12.85    0.83
   2  -6  -5   11.90    0.76
   2  -6  -5   13.33    0.85
   2  -6  -5   13.52    0.81
   2  -6  -5   12.74    0.70
  -2  -6   5   13.55    0.91
  -2   6   4   16.56    0.76
  -2   6   4   16.70    0.86
   2   6  -4   17.19    0.59
   2   6  -4   16.01    0.86
   2   6  -4   16.38    0.88
   2  -6  -4   17.16    0.79
  -2  -6   4   17.28    0.92
   2  -6  -4   16.34    0.74
   2  -6  -4   17.29    0.85
  -2  -6   4   16.58    0.88
   2  -6  -4   17.92    0.92
   2  -6  -4   17.20    1.11
  -2   6   3   42.72    1.41
  -2   6   3   42.50    1.42
   2   6  -3   43.26    1.55
  -2   6   3   42.33    1.49
   2   6  -3   42.15    1.52
   2  -6  -3   41.45    1.40
  -2  -6   3   42.83    1.57
   2  -6  -3   43.17    1.52
   2  -6  -3   43.60    1.42
   2  -6  -3   45.88    1.52
  -2  -6   3   41.55    1.54
  -2   6   2   11.20    0.45
   2   6  -2   10.64    0.55
   2   6  -2   10.72    0.59
  -2   6   2   10.13    0.53
  -2  -6   2   10.64    0.57
   2  -6  -2   11.38    0.56
   2  -6  -2   10.12    0.49
  -2  -6   2   10.99    0.61
   2  -6  -2   10.37    0.54
   2  -6  -2   11.24    0.44
   2  -6  -2   10.34    0.44
   2   6  -1    1.96    0.26
  -2   6   1    1.86    0.28
  -2   6   1    1.96    0.22
   2   6  -1    1.90    0.12
   2   6  -1    1.82    0.32
  -2   6   1    1.75    0.15
  -2   6   1    2.06    0.16
  -2  -6   1    2.10    0.29
   2  -6  -1    1.51    0.24
   2  -6  -1    1.64    0.23
  -2  -6   1    2.00    0.31
   2  -6  -1    1.86    0.16
   2  -6  -1    1.82    0.22
  -2  -6   1    1.80    0.15
  -2   6   0    0.33    0.14
   2   6   0    0.41    0.16
  -2   6   0    0.28    0.14
   2   6   0    0.18    0.11
   2   6   0    0.42    0.17
  -2   6   0    0.40    0.07
   2  -6   0    0.36    0.08
  -2  -6   0    0.43    0.28
  -2  -6   0    0.44    0.16
   2  -6   0    0.52    0.14
  -2  -6   0    0.25    0.15
   2  -6   0    0.32    0.12
  -2  -6   0    0.25    0.13
  -2  -6   0    0.36    0.08
  -2   6  -1   61.73    1.88
   2   6   1   60.68    1.98
   2   6   1   64.03    2.11
  -2   6  -1   61.58    1.91
  -2   6  -1   64.80    1.87
   2   6   1   72.86    2.41
   2   6   1   65.87    1.95
  -2   6  -1   62.44    1.91
   2   6   1   63.16    1.95
   2  -6   1   63.93    1.91
  -2  -6  -1   65.69    1.94
   2  -6   1   52.95    1.90
  -2  -6  -1   62.95    2.43
  -2  -6  -1   62.52    1.94
   2  -6   1   61.50    1.89
  -2  -6  -1   64.53    1.91
  -2   6  -2    6.76    0.37
  -2   6  -2    6.00    0.31
   2   6   2    5.92    0.47
   2   6   2    6.55    0.36
   2   6   2    6.24    0.37
  -2  -6  -2    5.90    0.36
   2  -6   2    5.89    0.38
  -2  -6  -2    5.65    0.36
   2  -6   2    6.20    0.37
  -2  -6  -2    6.14    0.33
  -2   6  -3  159.61    4.75
   2   6   3  158.72    4.67
   2   6   3  157.67    4.80
  -2   6  -3  157.23    4.70
   2   6   3  159.33    4.68
  -2  -6  -3  159.78    4.63
   2  -6   3  161.93    4.75
   2  -6   3  155.42    4.70
  -2  -6  -3  157.96    4.70
  -2   6  -4   49.93    1.81
   2   6   4   47.96    1.69
  -2   6  -4   50.24    1.75
   2   6   4   48.06    1.82
   2   6   4   48.27    1.75
  -2  -6  -4   50.13    1.75
   2  -6   4   49.36    1.75
   2  -6   4   47.73    1.49
   2  -6   4   50.97    1.84
  -2  -6  -4   50.16    1.82
  -2  -6  -4   50.29    1.67
   2   6   5    4.17    0.50
  -2   6  -5    4.55    0.58
   2   6   5    4.88    0.49
  -2   6  -5    4.09    0.50
   2   6   5    5.23    0.58
   2  -6   5    3.52    0.54
  -2  -6  -5    4.49    0.44
  -2  -6  -5    4.73    0.51
  -2  -6  -5    4.69    0.63
   2   6   6   51.96    2.01
   2   6   6   56.32    2.11
  -2   6  -6   57.00    2.10
  -2   6  -6   57.70    2.20
   2   6   6   53.52    2.13
  -2  -6  -6   57.20    2.14
   2  -6   6   55.37    2.17
  -2  -6  -6   57.59    2.27
  -2  -6  -6   56.83    1.99
   2  -6   6   51.78    2.07
  -2   6  -7    1.12    0.53
   2   6   7    0.29    0.42
   2   6   7    0.62    0.53
   2   6   7    1.07    0.50
  -2   6  -7    1.04    0.45
   2  -6   7    1.17    0.43
  -2  -6  -7    0.64    0.36
   2  -6   7    0.61    0.51
  -2  -6  -7    0.50    0.42
   2   6   8    0.70    0.52
   2   6   8    1.21    0.56
  -2   6  -8    0.51    0.52
  -2  -6  -8    0.89    0.54
  -2  -6  -8    1.40    0.49
   2  -6   8   -0.40    0.54
   2  -6   8    1.06    0.58
  -2   6  -9    7.97    1.05
   2   6   9    8.91    1.16
   2   6   9    7.20    1.21
  -2  -6  -9    6.98    1.08
   2  -6   9    9.57    1.27
  -2  -6  -9    7.72    1.07
   2   6  10    8.51    1.34
   2   6  10   11.64    1.53
  -2   6 -10   10.98    1.50
  -2  -6 -10   10.62    1.34
   2  -6  10    9.33    1.61
   2   6  11   -0.23    1.07
   2   6  11   -1.31    1.17
  -2   6 -11    2.12    1.12
   2  -6  11    0.94    1.11
  -2  -6 -11    1.25    0.97
  -2   7  11    6.36    1.27
  -2   7  11    5.17    1.24
  -2  -7  11    5.11    1.38
  -2  -7  11    7.73    1.32
   2  -7 -11    5.80    1.20
  -2   7  10    3.29    0.89
  -2   7  10    2.28    0.90
   2   7 -10    1.38    0.83
   2  -7 -10    2.57    0.89
  -2  -7  10    1.23    0.95
  -2  -7  10    2.78    0.94
   2  -7 -10    1.89    0.78
   2   7  -9    0.02    0.38
  -2   7   9    0.89    0.59
   2   7  -9    0.46    0.46
  -2   7   9    0.95    0.63
   2   7  -9    0.76    0.69
   2  -7  -9   -0.13    0.54
  -2  -7   9    0.42    0.71
   2  -7  -9    0.13    0.67
   2  -7  -9   -0.54    0.57
   2  -7  -9   -0.22    0.75
   2   7  -8    0.97    0.62
   2   7  -8   -0.27    0.58
  -2   7   8    1.00    0.53
   2   7  -8    1.21    0.41
  -2   7   8    1.54    0.62
   2  -7  -8    0.73    0.54
  -2  -7   8    0.43    0.58
   2  -7  -8    0.65    0.64
   2  -7  -8    0.01    0.45
  -2  -7   8   -0.01    0.63
   2  -7  -8    0.49    0.50
  -2   7   7   22.31    1.31
   2   7  -7   21.27    0.97
   2   7  -7   21.96    1.31
  -2   7   7   20.05    1.16
  -2   7   7   22.71    1.25
   2   7  -7   26.18    1.44
  -2  -7   7   23.48    1.41
   2  -7  -7   24.91    1.27
   2  -7  -7   22.71    1.27
  -2  -7   7   21.65    1.34
   2  -7  -7   23.63    1.17
   2  -7  -7   21.58    1.35
  -2   7   6    1.27    0.36
  -2   7   6    1.17    0.40
   2   7  -6    1.13    0.48
  -2   7   6    1.10    0.46
   2   7  -6    1.18    0.44
  -2  -7   6    0.59    0.37
   2  -7  -6    0.46    0.33
  -2  -7   6    0.57    0.44
   2  -7  -6    0.21    0.43
   2  -7  -6    0.89    0.31
   2  -7  -6    0.83    0.38
   2   7  -5   -0.24    0.26
  -2   7   5    0.16    0.31
  -2   7   5   -0.08    0.25
  -2   7   5    0.37    0.30
   2  -7  -5    0.15    0.28
   2  -7  -5    0.01    0.37
   2  -7  -5    0.28    0.20
   2  -7  -5    0.32    0.28
  -2  -7   5   -0.16    0.29
  -2  -7   5   -0.13    0.38
  -2   7   4    0.10    0.19
   2   7  -4    0.03    0.25
  -2   7   4   -0.07    0.17
   2   7  -4    0.27    0.09
  -2   7   4    0.01    0.25
   2  -7  -4   -0.06    0.23
  -2  -7   4   -0.04    0.23
   2  -7  -4    0.12    0.16
   2  -7  -4    0.15    0.20
  -2  -7   4    0.07    0.31
   2  -7  -4   -0.04    0.31
  -2   7   3  101.36    3.07
   2   7  -3   99.52    3.10
   2   7  -3   95.08    3.12
  -2   7   3  100.90    2.98
  -2   7   3   97.06    2.97
   2  -7  -3  100.90    2.97
   2  -7  -3   99.65    2.96
   2  -7  -3  100.54    3.10
   2  -7  -3  103.64    3.21
  -2  -7   3   99.35    3.16
  -2  -7   3   97.42    3.13
   2  -7  -3   98.83    3.10
  -2   7   2    3.15    0.32
  -2   7   2    2.87    0.21
  -2   7   2    2.69    0.41
   2   7  -2    2.87    0.36
  -2   7   2    2.89    0.37
   2   7  -2    2.89    0.34
   2  -7  -2    2.75    0.27
   2  -7  -2    2.64    0.21
   2  -7  -2    2.72    0.33
  -2  -7   2    2.84    0.39
   2  -7  -2    2.58    0.34
   2  -7  -2    2.57    0.19
  -2   7   1   76.86    2.24
  -2   7   1   76.33    2.24
   2   7  -1   80.26    2.40
  -2   7   1   74.42    2.42
   2   7  -1   78.35    2.24
  -2   7   1   75.99    2.36
   2   7  -1   76.54    2.44
   2   7  -1   83.59    2.43
   2  -7  -1   78.75    2.39
   2  -7  -1   82.36    2.36
   2  -7  -1   79.64    2.23
  -2  -7   1   78.20    2.41
   2  -7  -1   81.90    2.42
  -2  -7   1   79.17    2.45
  -2   7   0    5.70    0.22
   2   7   0    6.19    0.37
   2   7   0    6.22    0.40
  -2   7   0    5.66    0.33
  -2   7   0    5.30    0.37
   2   7   0    5.44    0.33
   2  -7   0    5.86    0.34
   2  -7   0    5.26    0.28
   2  -7   0    5.60    0.31
  -2  -7   0    6.14    0.37
   2  -7   0    5.53    0.23
  -2  -7   0    6.23    0.25
  -2  -7   0    5.94    0.35
  -2  -7   0    5.84    0.38
   2   7   1  101.89    3.11
   2   7   1  110.68    3.48
  -2   7  -1   98.46    2.95
   2   7   1  102.20    3.01
  -2   7  -1  103.91    2.93
   2   7   1   99.86    2.91
  -2   7  -1   99.95    2.92
  -2   7  -1  100.97    2.96
   2   7   1   92.80    2.99
   2   7   1   97.71    3.00
   2  -7   1  102.23    2.95
   2  -7   1   99.55    2.93
  -2  -7  -1   98.02    2.94
  -2  -7  -1  101.84    2.99
   2  -7   1   97.62    2.93
  -2  -7  -1   96.96    3.01
  -2  -7  -1  106.81    3.58
   2   7   2   48.38    1.46
   2   7   2   45.02    1.46
  -2   7  -2   44.55    1.46
   2   7   2   44.87    1.60
  -2   7  -2   43.97    1.38
  -2   7  -2   43.64    1.52
   2  -7   2   44.12    1.46
   2  -7   2   42.83    1.48
  -2  -7  -2   45.60    1.42
  -2  -7  -2   44.83    1.47
  -2  -7  -2   43.35    1.47
   2   7   3    1.46    0.36
   2   7   3    0.91    0.21
   2   7   3    1.46    0.25
  -2   7  -3    1.39    0.29
  -2   7  -3    1.12    0.23
   2  -7   3    0.88    0.22
  -2  -7  -3    1.42    0.35
  -2  -7  -3    1.01    0.22
  -2  -7  -3    1.35    0.25
  -2  -7  -3    1.22    0.20
   2  -7   3    1.08    0.25
   2   7   4   51.87    1.92
  -2   7  -4   51.72    1.87
   2   7   4   50.18    1.75
  -2   7  -4   49.43    1.79
   2   7   4   52.76    1.80
  -2  -7  -4   52.97    1.82
   2  -7   4   51.19    1.82
   2  -7   4   49.09    1.50
  -2  -7  -4   53.34    1.72
   2  -7   4   49.82    1.84
   2   7   5    0.08    0.24
   2   7   5   -0.28    0.29
   2   7   5    0.10    0.24
  -2   7  -5   -0.14    0.23
  -2   7  -5   -0.21    0.27
   2  -7   5   -0.46    0.27
   2  -7   5    0.07    0.33
  -2  -7  -5    0.02    0.36
  -2  -7  -5    0.07    0.26
  -2  -7  -5   -0.04    0.20
   2   7   6    2.13    0.41
   2   7   6    1.81    0.54
   2   7   6    2.22    0.46
  -2   7  -6    1.72    0.42
  -2   7  -6    2.36    0.51
   2  -7   6    3.40    0.59
  -2  -7  -6    2.96    0.60
  -2  -7  -6    2.82    0.53
   2  -7   6    3.40    0.52
   2   7   7    6.29    0.74
  -2   7  -7    6.37    0.78
   2   7   7    7.28    0.85
  -2   7  -7    7.35    0.88
   2   7   7    6.67    0.86
   2  -7   7    6.48    0.83
  -2  -7  -7    7.24    0.88
  -2  -7  -7    6.99    0.82
   2  -7   7    7.21    0.86
  -2  -7  -7    6.30    0.66
  -2   7  -8    4.42    0.77
  -2   7  -8    3.16    0.67
   2   7   8    3.78    0.72
   2  -7   8    2.31    0.62
  -2  -7  -8    3.52    0.59
   2  -7   8    2.94    0.76
  -2  -7  -8    4.17    0.71
   2   7   9    0.98    0.70
  -2   7  -9    0.42    0.68
   2   7   9    0.93    0.78
   2  -7   9    0.57    0.75
  -2  -7  -9   -0.87    0.52
  -2  -7  -9    0.41    0.54
   2   7  10    3.12    1.02
   2   7  10    1.01    0.93
  -2   7 -10    1.50    0.86
   2  -7  10    3.08    1.01
  -2  -7 -10   -0.17    0.79
   2   7  11    0.39    1.05
   2   7  11   -1.12    1.20
  -2   7 -11    1.38    1.15
  -2  -7 -11    0.74    0.93
   2  -7  11    2.37    1.13
   2   8 -11    1.25    1.02
  -2   8  11    3.16    1.11
  -2   8  11    2.59    0.98
  -2  -8  11    0.80    1.25
   2  -8 -11    1.02    0.91
  -2  -8  11    0.19    1.03
  -2   8  10   -0.26    0.85
  -2   8  10   -0.22    0.74
  -2  -8  10    0.74    0.96
   2  -8 -10   -0.61    0.73
  -2  -8  10    0.03    0.89
  -2   8   9   18.12    1.41
   2   8  -9   18.44    0.97
  -2   8   9   19.61    1.39
  -2  -8   9   17.43    1.55
   2  -8  -9   17.92    1.29
   2  -8  -9   17.96    1.59
   2  -8  -9   18.61    1.41
  -2   8   8    4.73    0.76
   2   8  -8    5.61    0.88
  -2   8   8    6.16    0.89
   2   8  -8    5.92    0.62
  -2  -8   8    4.81    0.84
   2  -8  -8    4.71    0.74
   2  -8  -8    6.15    0.83
   2  -8  -8    4.95    0.88
   2  -8  -8    6.83    0.84
  -2   8   7    3.62    0.59
   2   8  -7    4.04    0.72
  -2   8   7    4.48    0.72
   2   8  -7    3.50    0.47
  -2   8   7    3.60    0.53
   2  -8  -7    3.24    0.57
   2  -8  -7    3.26    0.57
  -2  -8   7    2.44    0.72
  -2  -8   7    2.80    0.62
   2  -8  -7    4.01    0.77
   2  -8  -7    4.85    0.71
  -2   8   6   12.28    0.91
   2   8  -6   12.33    0.92
  -2   8   6   12.55    0.87
  -2   8   6   10.54    0.74
   2  -8  -6   12.89    0.76
   2  -8  -6   12.56    0.83
  -2  -8   6   13.56    1.05
   2  -8  -6   13.41    0.94
   2  -8  -6   11.72    0.96
  -2  -8   6    9.91    0.92
   2   8  -5    1.04    0.35
  -2   8   5    1.82    0.44
  -2   8   5    1.60    0.37
   2   8  -5    1.88    0.42
  -2   8   5    1.42    0.29
   2  -8  -5    1.80    0.30
  -2  -8   5    1.72    0.39
   2  -8  -5    2.52    0.51
  -2  -8   5    1.48    0.43
   2  -8  -5    1.99    0.40
   2  -8  -5    1.47    0.34
   2   8  -4   38.22    1.53
  -2   8   4   38.95    1.46
  -2   8   4   38.55    1.38
  -2   8   4   38.19    1.35
   2   8  -4   40.80    1.53
  -2  -8   4   38.91    1.53
   2  -8  -4   39.00    1.34
  -2  -8   4   40.12    1.57
   2  -8  -4   37.50    1.52
   2  -8  -4   38.97    1.37
   2  -8  -4   37.22    1.56
   2  -8  -4   36.58    1.49
  -2   8   3   74.29    2.40
   2   8  -3   74.68    2.43
  -2   8   3   75.68    2.30
   2   8  -3   75.64    2.47
  -2   8   3   74.90    2.28
  -2   8   3   73.48    2.75
   2  -8  -3   75.37    2.27
   2  -8  -3   75.96    2.53
   2  -8  -3   76.77    2.37
  -2  -8   3   77.01    2.51
  -2  -8   3   74.58    2.47
   2  -8  -3   76.91    2.45
   2  -8  -3   71.11    2.43
  -2   8   2   13.66    0.49
  -2   8   2   13.81    0.70
  -2   8   2   12.54    0.55
   2   8  -2   14.22    0.66
  -2   8   2   13.43    0.62
   2   8  -2   13.33    0.69
  -2   8   2   13.47    0.76
   2  -8  -2   13.51    0.64
   2  -8  -2   13.01    0.66
   2  -8  -2   13.29    0.47
   2  -8  -2   13.72    0.48
   2  -8  -2   13.26    0.59
  -2  -8   2   13.62    0.71
   2   8  -1  111.13    3.43
   2   8  -1  114.56    3.23
  -2   8   1  111.05    3.43
   2   8  -1  117.99    3.38
   2   8  -1  116.57    3.41
  -2   8   1  108.64    3.35
  -2  -8   1  115.78    3.40
   2  -8  -1  117.15    3.41
  -2  -8   1  115.08    3.44
   2  -8  -1  113.79    3.34
   2  -8  -1  111.74    3.37
  -2   8   0   71.72    2.28
   2   8   0   70.42    2.23
   2   8   0   72.46    2.30
   2   8   0   79.68    2.30
  -2   8   0   72.23    2.10
  -2   8   0   73.89    2.23
  -2   8   0   74.09    2.13
   2  -8   0   72.20    2.13
  -2  -8   0   73.65    2.24
  -2  -8   0   71.67    2.28
   2  -8   0   72.92    2.23
   2  -8   0   74.12    2.11
   2  -8   0   77.23    2.23
  -2  -8   0   75.30    2.66
  -2  -8   0   74.79    2.28
  -2  -8   0   75.78    2.13
  -2   8  -1   40.58    1.27
  -2   8  -1   42.65    1.29
  -2   8  -1   40.77    1.32
   2   8   1   39.71    1.25
   2   8   1   41.14    1.47
   2   8   1   41.64    1.37
   2   8   1   38.46    1.30
  -2   8  -1   41.59    1.30
   2   8   1   39.62    1.35
  -2  -8  -1   40.77    1.33
  -2  -8  -1   39.02    1.36
  -2  -8  -1   40.18    1.29
   2  -8   1   40.93    1.30
   2  -8   1   40.50    1.29
   2  -8   1   41.48    1.27
   2   8   2   83.87    2.76
  -2   8  -2   85.61    2.60
   2   8   2   86.18    2.59
  -2   8  -2   84.39    2.53
  -2   8  -2   84.95    2.63
   2   8   2   86.94    2.59
   2   8   2   87.19    2.61
  -2  -8  -2   87.69    2.55
  -2  -8  -2   84.28    2.63
   2  -8   2   84.73    2.62
   2  -8   2   84.54    2.60
  -2  -8  -2   85.02    2.60
   2   8   3   24.26    0.94
   2   8   3   23.66    0.93
   2   8   3   21.72    1.08
  -2   8  -3   25.28    1.03
  -2   8  -3   23.86    0.96
  -2  -8  -3   24.52    0.97
  -2  -8  -3   23.32    0.95
  -2  -8  -3   24.52    1.10
  -2  -8  -3   23.95    0.89
   2  -8   3   24.95    1.01
   2  -8   3   24.34    0.98
  -2   8  -4   20.55    0.95
   2   8   4   20.80    0.90
  -2   8  -4   22.82    1.03
   2   8   4   20.44    1.07
   2   8   4   21.02    0.93
  -2  -8  -4   21.00    0.85
  -2  -8  -4   19.92    0.94
  -2  -8  -4   21.77    1.09
   2  -8   4   20.58    0.95
   2  -8   4   20.34    0.98
   2   8   5   11.84    0.69
   2   8   5   12.10    0.75
   2   8   5   12.34    0.91
  -2   8  -5   11.91    0.84
  -2  -8  -5   12.94    0.78
   2  -8   5   11.60    0.81
   2  -8   5   11.80    0.77
  -2  -8  -5   12.83    0.67
  -2  -8  -5   11.11    0.89
  -2   8  -6    3.70    0.61
   2   8   6    6.03    0.60
   2   8   6    7.15    0.77
   2   8   6    5.24    0.63
  -2   8  -6    5.52    0.77
  -2  -8  -6    6.24    0.69
  -2  -8  -6    5.42    0.56
   2  -8   6    5.11    0.73
  -2  -8  -6    5.72    0.82
   2  -8   6    5.45    0.68
  -2   8  -7    3.23    0.65
   2   8   7    3.25    0.73
  -2   8  -7    4.43    0.71
   2   8   7    2.86    0.53
   2   8   7    3.16    0.69
   2   8   7    4.19    0.69
   2  -8   7    2.62    0.64
  -2  -8  -7    3.53    0.52
   2  -8   7    4.76    0.80
  -2  -8  -7    4.12    0.70
  -2  -8  -7    2.70    0.69
   2   8   8    0.85    0.65
  -2   8  -8    0.53    0.59
   2   8   8    2.59    0.64
   2  -8   8    0.85    0.61
  -2  -8  -8    0.33    0.44
   2  -8   8    0.96    0.62
  -2  -8  -8    0.98    0.48
  -2   8  -9    1.73    0.76
   2   8   9    2.95    0.77
   2   8   9    1.11    0.80
   2  -8   9    2.84    0.83
  -2  -8  -9    2.54    0.71
  -2  -8  -9    1.68    0.66
   2   8  10    2.16    0.94
   2   8  10   -0.48    0.82
  -2   8 -10    0.88    0.90
  -2  -8 -10    0.74    0.73
   2  -8  10    0.46    0.92
   2   8  11    3.21    1.32
   2   8  11    4.06    1.17
  -2   8 -11    2.51    1.15
   2  -8  11    4.25    1.22
  -2  -8 -11    2.21    1.04
   2   9 -11   -0.01    1.01
  -2   9  11    1.67    1.10
  -2   9  11    1.90    1.02
  -2  -9  11    2.29    1.17
   2  -9 -11   -1.28    0.88
  -2  -9  11   -0.50    1.13
  -2   9  10    4.10    0.99
   2   9 -10    4.94    0.98
  -2   9  10    4.66    0.94
  -2  -9  10    2.21    1.02
   2  -9 -10    4.19    0.94
  -2  -9  10    3.34    1.04
   2  -9 -10    5.53    0.93
  -2   9   9    3.78    0.76
   2   9  -9    2.94    0.49
  -2   9   9    3.11    0.78
   2   9  -9    2.14    0.46
   2  -9  -9    3.20    0.68
  -2  -9   9    1.22    0.88
   2  -9  -9    2.23    0.64
  -2   9   8    0.99    0.55
  -2   9   8    0.87    0.60
   2   9  -8    1.50    0.40
  -2   9   8    1.59    0.58
  -2  -9   8    1.78    0.68
  -2  -9   8    0.83    0.68
   2  -9  -8    2.31    0.80
   2  -9  -8    2.08    0.55
   2  -9  -8    1.70    0.60
   2   9  -7    1.64    0.53
   2   9  -7    1.33    0.34
  -2   9   7    0.47    0.43
  -2   9   7    1.07    0.40
  -2   9   7    1.09    0.54
  -2  -9   7    1.41    0.61
   2  -9  -7    1.51    0.41
   2  -9  -7    1.48    0.61
  -2  -9   7    1.86    0.60
   2  -9  -7    1.42    0.46
   2  -9  -7    1.35    0.51
  -2   9   6    1.52    0.38
  -2   9   6    1.60    0.41
   2   9  -6    2.21    0.51
  -2   9   6    1.88    0.54
   2   9  -6    1.95    0.51
  -2  -9   6    1.21    0.51
   2  -9  -6    0.97    0.50
   2  -9  -6    1.12    0.47
   2  -9  -6    2.11    0.44
   2  -9  -6    1.67    0.36
  -2  -9   6    1.37    0.50
  -2   9   5    1.48    0.44
   2   9  -5    1.08    0.43
   2   9  -5    1.51    0.38
  -2   9   5    1.10    0.28
  -2   9   5    2.09    0.38
  -2  -9   5    1.71    0.49
   2  -9  -5    1.65    0.34
   2  -9  -5    1.75    0.48
   2  -9  -5    1.15    0.37
   2  -9  -5    1.67    0.28
  -2  -9   5    1.61    0.44
   2   9  -4   29.78    1.27
  -2   9   4   28.66    1.10
   2   9  -4   29.15    1.25
  -2   9   4   29.54    1.08
  -2   9   4   29.37    1.21
  -2  -9   4   28.75    1.27
   2  -9  -4   29.68    1.10
   2  -9  -4   28.24    1.05
   2  -9  -4   29.78    1.29
  -2  -9   4   28.66    1.30
   2  -9  -4   29.14    1.32
  -2   9   3    6.26    0.40
  -2   9   3    6.57    0.36
   2   9  -3    6.83    0.53
  -2   9   3    5.91    0.49
   2   9  -3    6.73    0.54
   2  -9  -3    6.55    0.55
  -2  -9   3    7.02    0.57
   2  -9  -3    6.36    0.44
   2  -9  -3    6.22    0.57
  -2  -9   3    6.17    0.58
   2  -9  -3    7.28    0.55
   2  -9  -3    6.86    0.47
   2   9  -2   19.31    0.90
  -2   9   2   21.03    0.84
   2   9  -2   21.29    0.87
  -2   9   2   20.95    0.69
  -2   9   2   20.26    0.93
  -2   9   2   21.27    0.70
   2   9  -2   21.11    0.70
   2  -9  -2   21.41    0.88
   2  -9  -2   22.14    0.83
   2  -9  -2   21.16    0.66
   2  -9  -2   21.62    0.90
   2  -9  -2   21.13    0.67
   2  -9  -2   22.52    0.99
  -2  -9   2   20.44    0.92
  -2   9   1   14.36    0.71
   2   9  -1   15.54    0.64
   2   9  -1   16.07    0.69
   2   9  -1   14.76    0.70
  -2  -9   1   14.80    0.67
   2  -9  -1   14.57    0.64
  -2  -9   1   15.26    0.71
   2  -9  -1   15.01    0.65
   2  -9  -1   15.11    0.62
   2  -9  -1   15.07    0.70
  -2   9   0  129.33    3.59
  -2   9   0  124.20    3.70
   2   9   0  123.11    3.76
   2   9   0  116.28    3.69
   2   9   0  128.49    3.82
   2   9   0  130.09    3.76
  -2   9   0  126.09    3.56
  -2   9   0  127.97    3.76
   2  -9   0  133.10    3.70
  -2  -9   0  127.34    4.19
   2  -9   0  132.53    3.58
  -2  -9   0  124.01    3.76
   2  -9   0  125.04    3.71
  -2  -9   0  128.70    3.60
  -2  -9   0  125.16    3.74
   2  -9   0  124.48    3.56
  -2  -9   0  123.71    3.71
  -2   9  -1  169.68    4.92
   2   9   1  174.99    5.01
   2   9   1  167.95    4.85
  -2   9  -1  166.31    4.96
  -2   9  -1  167.68    4.94
  -2   9  -1  171.98    4.92
   2   9   1  170.38    5.10
   2   9   1  164.99    4.91
   2   9   1  169.52    4.98
  -2   9  -1  168.81    4.88
   2   9   1  183.89    5.50
  -2  -9  -1  169.29    4.92
   2  -9   1  172.77    4.91
  -2  -9  -1  170.04    4.95
   2  -9   1  165.02    4.93
  -2  -9  -1  168.74    5.00
   2  -9   1  165.24    4.88
  -2  -9  -1  192.76    5.69
   2   9   2   96.28    3.08
   2   9   2   98.71    3.03
  -2   9  -2  102.76    3.06
   2   9   2  107.84    3.72
  -2   9  -2  102.43    3.02
   2   9   2  101.14    3.21
  -2   9  -2  102.25    2.97
   2   9   2  100.07    3.00
   2  -9   2  101.05    3.05
  -2  -9  -2   98.86    3.01
  -2  -9  -2   95.44    3.05
  -2  -9  -2   97.93    2.96
   2  -9   2   98.98    3.02
  -2   9  -3    5.60    0.46
   2   9   3    4.99    0.52
   2   9   3    5.73    0.42
   2   9   3    4.76    0.56
  -2   9  -3    6.00    0.44
  -2   9  -3    5.36    0.38
   2   9   3    5.91    0.41
   2   9   3    4.88    1.15
  -2  -9  -3    5.06    0.44
   2  -9   3    5.54    0.44
  -2  -9  -3    5.22    0.35
   2  -9   3    5.57    0.48
  -2  -9  -3    5.80    0.42
  -2   9  -4   49.07    1.80
   2   9   4   47.33    1.69
   2   9   4   50.22    1.89
  -2   9  -4   47.87    1.73
   2   9   4   47.86    1.66
   2   9   4   47.77    1.76
  -2  -9  -4   48.50    1.70
  -2  -9  -4   47.29    1.87
  -2  -9  -4   48.13    1.72
   2  -9   4   46.27    1.73
   2  -9   4   47.70    1.78
  -2  -9  -4   48.53    1.61
   2   9   5   -0.02    0.25
  -2   9  -5    0.13    0.26
   2   9   5   -0.22    0.33
   2   9   5   -0.32    0.38
  -2   9  -5   -0.21    0.31
   2   9   5   -0.13    0.21
   2  -9   5   -0.28    0.28
  -2  -9  -5   -0.21    0.42
  -2  -9  -5    0.19    0.29
   2  -9   5    0.05    0.26
  -2  -9  -5    0.15    0.22
   2   9   6   -0.04    0.30
  -2   9  -6    0.79    0.41
   2   9   6    0.66    0.45
  -2   9  -6    0.41    0.37
   2   9   6    0.29    0.49
   2   9   6    0.21    0.33
   2  -9   6    0.34    0.43
   2  -9   6    0.11    0.39
  -2  -9  -6    0.12    0.49
  -2  -9  -6    0.91    0.40
  -2  -9  -6    0.68    0.30
  -2   9  -7   -0.41    0.42
   2   9   7    0.60    0.40
  -2   9  -7    0.09    0.49
   2   9   7    0.02    0.52
   2   9   7   -0.52    0.46
   2   9   7   -0.18    0.37
  -2  -9  -7    0.17    0.39
   2  -9   7    0.53    0.44
   2  -9   7   -0.35    0.45
  -2  -9  -7    0.56    0.32
  -2  -9  -7   -0.15    0.57
   2   9   8    0.67    0.53
   2   9   8    0.21    0.59
  -2   9  -8   -0.07    0.62
   2  -9   8    0.84    0.61
  -2  -9  -8    0.11    0.41
  -2  -9  -8    0.46    0.52
   2  -9   8   -0.48    0.55
   2   9   9    1.34    0.74
  -2   9  -9   -0.27    0.74
   2   9   9    0.28    0.67
  -2  -9  -9    1.07    0.60
  -2  -9  -9   -0.15    0.56
   2  -9   9    1.49    0.76
   2   9  10    1.16    0.91
   2   9  10    4.12    1.08
  -2   9 -10    1.87    0.97
  -2  -9 -10    2.85    0.83
  -2  -9 -10    2.99    0.83
   2  -9  10    1.19    0.94
   2   9  11    0.50    1.11
   2   9  11   -1.36    1.25
  -2   9 -11    3.69    1.24
  -2  -9 -11    1.67    1.80
   2  -9  11    1.66    1.19
   2  10 -11    3.63    1.28
   2 -10 -11    5.76    1.09
  -2 -10  11    4.71    1.33
  -2 -10  11    1.65    1.22
  -2  10  10   12.43    1.41
   2  10 -10    9.90    1.42
  -2  10  10    7.95    1.19
   2 -10 -10    8.02    1.32
  -2 -10  10    7.92    1.32
  -2  10   9    2.11    0.72
  -2  10   9    2.89    0.73
   2  10  -9    0.77    0.42
   2  10  -9    1.77    0.41
   2  10  -9    2.00    0.70
  -2 -10   9    0.71    0.84
   2 -10  -9    0.82    0.64
   2 -10  -9    0.51    0.57
   2  10  -8    3.70    0.77
   2  10  -8    8.33    1.04
  -2  10   8    5.64    0.91
   2  10  -8    5.86    0.53
  -2  10   8    4.85    0.80
   2 -10  -8    5.96    0.85
   2 -10  -8    4.49    0.98
   2 -10  -8    6.02    0.78
  -2 -10   8    4.85    0.94
  -2 -10   8    5.02    0.89
   2 -10  -8    4.53    0.74
   2  10  -7    7.33    0.90
  -2  10   7    4.91    0.74
   2  10  -7    6.72    0.90
   2  10  -7    5.33    0.48
  -2  10   7    5.10    0.68
  -2  10   7    7.18    0.90
   2 -10  -7    6.82    0.92
   2 -10  -7    5.35    0.63
  -2 -10   7    5.04    0.88
   2 -10  -7    5.82    0.99
   2 -10  -7    6.33    0.73
  -2 -10   7    6.10    0.92
   2  10  -6    3.45    0.56
  -2  10   6    3.95    0.56
   2  10  -6    4.31    0.69
  -2  10   6    3.60    0.48
  -2  10   6    4.24    0.63
   2 -10  -6    4.25    0.58
   2 -10  -6    4.07    0.61
   2 -10  -6    3.81    0.47
  -2 -10   6    3.44    0.64
   2 -10  -6    4.31    0.83
  -2 -10   6    4.21    0.67
   2  10  -5   10.30    0.80
  -2  10   5    9.32    0.59
   2  10  -5    9.75    0.83
  -2  10   5   10.52    0.78
   2 -10  -5   10.11    0.65
   2 -10  -5   10.42    0.81
   2 -10  -5   10.32    0.87
  -2 -10   5   10.95    1.01
   2 -10  -5    8.95    0.57
  -2 -10   5   10.00    0.79
   2  10  -4   29.47    1.33
  -2  10   4   31.43    1.29
  -2  10   4   31.58    1.13
  -2  10   4   34.31    1.83
  -2  10   4   30.47    1.16
   2  10  -4   29.92    1.32
   2 -10  -4   32.12    1.25
   2 -10  -4   32.07    1.11
   2 -10  -4   32.03    1.36
   2 -10  -4   31.05    1.15
  -2 -10   4   31.12    1.38
  -2 -10   4   30.36    1.35
   2 -10  -4   32.54    1.43
   2  10  -3   13.16    0.73
  -2  10   3   10.18    0.88
  -2  10   3   13.42    0.70
  -2  10   3   13.04    0.52
   2  10  -3   12.67    0.86
  -2 -10   3   12.85    0.75
   2 -10  -3   12.66    0.73
   2 -10  -3   12.91    0.50
  -2 -10   3   13.23    0.78
   2 -10  -3   10.65    0.87
   2  10  -2   31.37    0.99
   2  10  -2   31.48    1.22
  -2  10   2   32.08    0.97
   2  10  -2   32.08    1.17
   2  10  -2   32.60    1.19
  -2  10   2   31.06    1.24
  -2  10   2   30.03    0.94
  -2 -10   2   32.44    1.24
   2 -10  -2   31.39    1.21
   2 -10  -2   30.87    1.27
   2 -10  -2   29.03    1.52
   2 -10  -2   30.51    1.16
   2 -10  -2   31.32    1.12
   2  10  -1   11.82    0.45
  -2  10   1   12.32    0.57
   2  10  -1   12.71    0.64
   2  10  -1   13.13    0.58
   2  10  -1   12.60    0.63
  -2  10   1   12.70    0.66
   2 -10  -1   12.26    0.59
   2 -10  -1   10.94    0.76
   2 -10  -1   13.04    0.56
   2 -10  -1   12.62    0.59
  -2 -10   1   12.80    0.62
  -2 -10   1   12.63    0.52
  -2 -10   1   12.56    0.65
   2 -10  -1   13.05    0.70
   2 -10  -1   12.60    0.64
  -2  10   0   48.06    1.46
  -2  10   0   48.84    1.68
   2  10   0   52.47    1.76
   2  10   0   50.00    1.61
  -2  10   0   48.98    1.62
  -2  10   0   50.80    1.49
   2  10   0   50.58    1.69
   2  10   0   53.26    1.69
   2 -10   0   49.01    1.64
  -2 -10   0   51.34    1.48
  -2 -10   0   50.28    1.69
   2 -10   0   50.49    1.61
  -2 -10   0   50.36    1.63
   2 -10   0   49.46    1.46
   2 -10   0   50.89    1.71
  -2 -10   0   53.42    1.53
   2 -10   0   50.18    1.47
  -2 -10   0   54.57    1.68
  -2  10  -1    1.07    0.21
   2  10   1    0.61    0.36
   2  10   1    1.31    0.26
  -2  10  -1    1.10    0.18
  -2  10  -1    0.99    0.17
   2  10   1    0.84    0.20
  -2  10  -1    1.23    0.20
   2  10   1    1.15    0.19
   2  10   1    0.74    0.15
   2  10   1    0.80    0.31
  -2  10  -1    1.04    0.20
  -2 -10  -1    1.06    0.17
   2 -10   1    1.50    0.27
   2 -10   1    1.12    0.21
  -2 -10  -1    0.67    0.18
   2 -10   1    1.04    0.19
   2 -10   1    1.07    0.17
  -2 -10  -1    1.43    0.24
  -2 -10  -1    0.75    0.22
   2  10   2   52.39    1.65
  -2  10  -2   50.27    1.66
  -2  10  -2   51.38    1.70
   2  10   2   49.60    1.86
  -2  10  -2   50.35    1.66
  -2  10  -2   51.88    1.64
   2  10   2   52.20    1.69
   2 -10   2   51.29    1.69
   2 -10   2   49.53    1.65
  -2 -10  -2   51.76    1.62
  -2 -10  -2   53.97    1.67
  -2 -10  -2   51.02    1.73
   2 -10   2   49.71    1.58
   2  10   3    6.56    0.54
   2  10   3    6.93    0.44
  -2  10  -3    6.61    0.51
   2  10   3    6.96    0.63
  -2  10  -3    6.20    0.53
  -2  10  -3    7.42    0.45
   2 -10   3    6.87    0.48
  -2 -10  -3    6.72    0.46
  -2 -10  -3    7.53    0.66
   2 -10   3    6.99    0.53
  -2 -10  -3    7.20    0.42
  -2 -10  -3    6.05    0.47
   2  10   4    2.23    0.47
  -2  10  -4    2.71    0.40
   2  10   4    2.77    0.46
   2  10   4    4.21    1.06
   2  10   4    2.41    0.36
  -2  10  -4    3.13    0.51
   2  10   4    2.53    0.39
  -2 -10  -4    2.92    0.42
  -2 -10  -4    2.93    0.33
  -2 -10  -4    2.92    0.55
   2 -10   4    3.01    0.48
  -2 -10  -4    2.85    0.43
   2 -10   4    2.74    0.43
   2  10   5    6.24    0.58
  -2  10  -5    4.54    0.54
  -2  10  -5    5.27    0.64
   2  10   5    5.37    0.72
   2  10   5    4.62    0.49
   2  10   5    5.50    0.77
   2 -10   5    3.90    0.56
  -2 -10  -5    5.40    0.45
   2 -10   5    5.18    0.62
  -2 -10  -5    4.64    0.80
  -2 -10  -5    4.88    0.57
   2  10   6   35.42    1.69
   2  10   6   36.12    1.54
   2  10   6   35.30    1.64
  -2  10  -6   32.28    1.52
   2  10   6   35.87    1.47
  -2  10  -6   35.86    1.66
  -2 -10  -6   34.98    1.71
   2 -10   6   34.33    1.57
  -2 -10  -6   37.38    1.60
  -2 -10  -6   37.96    1.43
   2 -10   6   37.01    1.67
  -2  10  -7   11.37    0.99
   2  10   7   12.40    1.13
   2  10   7   15.82    1.07
   2  10   7   14.88    1.16
   2  10   7   12.01    0.92
  -2  10  -7   13.26    1.17
  -2 -10  -7   12.16    1.21
  -2 -10  -7   14.19    1.05
   2 -10   7   14.30    1.07
   2 -10   7   14.86    1.72
  -2 -10  -7   14.66    0.87
   2  10   8    0.84    0.57
  -2  10  -8    0.03    0.62
   2  10   8    0.96    0.63
  -2 -10  -8    0.30    0.46
   2 -10   8   -0.36    0.58
   2 -10   8   -0.02    0.62
  -2 -10  -8    0.07    0.56
   2  10   9   -0.64    0.66
   2  10   9    0.14    0.71
  -2  10  -9    0.92    0.76
   2 -10   9   -0.09    0.77
  -2 -10  -9    0.08    0.64
  -2 -10  -9    1.09    0.62
   2  10  10    0.41    0.87
   2  10  10    1.56    0.94
  -2  10 -10    1.28    0.98
  -2 -10 -10    0.48    0.77
   2 -10  10    0.45    0.97
  -2 -10 -10    1.69    0.86
   2  11 -11    3.82    1.27
  -2  11  11    3.62    1.18
  -2 -11  11    3.22    1.21
   2 -11 -11    1.81    1.09
  -2 -11  11    1.74    1.30
  -2  11  10    4.20    1.05
  -2  11  10    6.33    1.28
   2  11 -10    6.86    1.20
  -2 -11  10    5.05    1.23
   2 -11 -10    5.34    1.05
   2  11  -9    1.53    0.40
  -2  11   9    2.40    0.77
   2  11  -9    1.80    0.80
  -2  11   9    3.11    0.78
   2 -11  -9    2.46    0.62
   2 -11  -9    1.25    0.68
  -2 -11   9    2.51    0.92
   2  11  -8    6.49    0.48
   2  11  -8    6.63    1.11
  -2  11   8    8.19    1.04
  -2  11   8    5.31    0.80
   2  11  -8    5.67    0.52
  -2  11   8    6.83    0.95
   2 -11  -8    6.04    0.85
  -2 -11   8    6.68    0.99
   2 -11  -8    6.08    1.11
   2 -11  -8    6.72    1.35
   2 -11  -8    5.81    0.79
  -2 -11   8    5.39    0.94
  -2  11   7   24.04    1.21
   2  11  -7   23.92    0.95
   2  11  -7   23.10    1.41
  -2  11   7   24.28    1.29
  -2  11   7   25.88    1.38
   2  11  -7   24.28    1.46
   2 -11  -7   27.98    1.31
  -2 -11   7   25.36    1.48
   2 -11  -7   26.47    1.45
   2 -11  -7   24.78    1.17
  -2 -11   7   26.49    1.53
   2 -11  -7   25.29    1.58
  -2  11   6    9.54    0.74
   2  11  -6    7.56    0.91
  -2  11   6    8.85    0.68
   2  11  -6    9.98    0.87
  -2  11   6    8.65    0.83
   2 -11  -6    9.56    0.63
  -2 -11   6    9.66    0.99
  -2 -11   6    8.07    0.88
   2 -11  -6    9.55    0.74
   2 -11  -6   10.50    0.93
   2 -11  -6    8.55    1.00
   2  11  -5    6.86    0.72
  -2  11   5    6.31    0.68
  -2  11   5    5.10    0.54
  -2  11   5    6.44    0.50
   2  11  -5    6.55    0.69
   2 -11  -5    6.43    0.75
  -2 -11   5    6.52    0.71
  -2 -11   5    6.45    0.79
   2 -11  -5    5.71    0.44
   2 -11  -5    6.23    0.55
   2 -11  -5    6.36    0.79
   2  11  -4    1.69    0.39
   2  11  -4    2.40    0.44
  -2  11   4    3.80    0.93
  -2  11   4    1.94    0.29
  -2  11   4    2.67    0.31
  -2  11   4    2.94    0.45
   2 -11  -4    2.31    0.49
  -2 -11   4    2.37    0.46
   2 -11  -4    2.10    0.37
   2 -11  -4    3.44    0.47
   2 -11  -4    3.05    0.57
   2 -11  -4    1.89    0.38
  -2 -11   4    2.03    0.45
   2 -11  -4    2.71    0.27
   2  11  -3    2.74    0.43
   2  11  -3    2.65    0.44
  -2  11   3    2.56    0.39
  -2  11   3    2.46    0.22
   2 -11  -3    3.18    0.52
   2 -11  -3    2.32    0.34
  -2 -11   3    2.12    0.37
  -2 -11   3    1.90    0.39
   2 -11  -3    2.32    0.20
   2 -11  -3    1.96    0.37
   2 -11  -3    2.20    0.26
   2  11  -2   22.34    0.75
   2  11  -2   22.97    0.93
  -2  11   2   20.60    0.98
   2  11  -2   21.61    0.97
   2  11  -2   21.98    0.94
   2 -11  -2   21.70    1.02
   2 -11  -2   23.12    0.88
  -2 -11   2   20.39    0.95
   2 -11  -2   21.31    0.92
   2 -11  -2   22.35    0.96
  -2 -11   2   21.94    0.99
   2  11  -1   10.61    0.59
   2  11  -1   10.31    0.60
   2  11  -1   10.11    0.60
  -2  11   1    9.71    0.61
  -2  11   1   10.08    0.53
   2  11  -1   10.42    0.53
   2  11  -1   10.49    0.42
   2 -11  -1    9.62    0.55
   2 -11  -1    9.76    0.54
  -2 -11   1   10.13    0.57
  -2 -11   1   10.49    0.48
   2 -11  -1    9.89    0.64
   2 -11  -1   10.22    0.52
   2 -11  -1    9.88    0.61
  -2 -11   1   10.36    0.60
  -2  11   0    1.65    0.17
   2  11   0    1.77    0.28
  -2  11   0    1.81    0.29
  -2  11   0    1.80    0.12
   2  11   0    2.15    0.37
   2  11   0    1.84    0.30
   2  11   0    2.11    0.32
  -2  11   0    1.67    0.27
  -2 -11   0    1.78    0.26
  -2 -11   0    1.95    0.21
  -2 -11   0    1.94    0.19
   2 -11   0    1.46    0.22
   2 -11   0    1.67    0.30
  -2 -11   0    2.27    0.32
   2 -11   0    2.17    0.34
  -2 -11   0    1.65    0.50
  -2 -11   0    2.30    0.35
   2  11   1   80.15    2.81
   2  11   1   78.28    2.46
  -2  11  -1   79.82    2.42
  -2  11  -1   77.46    2.33
   2  11   1   77.78    2.36
  -2  11  -1   78.55    2.46
  -2  11  -1   76.51    2.41
   2  11   1   83.14    2.51
   2 -11   1   76.52    2.35
  -2 -11  -1   80.74    2.41
   2 -11   1   76.22    2.42
   2 -11   1   78.87    2.33
  -2 -11  -1   78.91    2.35
  -2 -11  -1   77.50    2.38
  -2 -11  -1   79.51    3.12
   2 -11   1   77.63    2.43
  -2 -11  -1   78.09    2.49
   2  11   2   56.14    1.78
  -2  11  -2   56.44    1.80
   2  11   2   54.34    2.01
  -2  11  -2   54.63    1.80
   2  11   2   65.28    2.62
   2  11   2   55.11    1.83
  -2  11  -2   55.57    1.79
  -2  11  -2   55.83    1.83
  -2 -11  -2   55.20    1.75
  -2 -11  -2   55.53    1.80
  -2 -11  -2   54.02    1.88
   2 -11   2   54.89    1.83
   2 -11   2   54.81    1.79
   2 -11   2   55.63    1.74
  -2  11  -3    4.45    0.45
   2  11   3    4.99    0.39
   2  11   3    4.64    0.48
   2  11   3    3.23    0.84
  -2  11  -3    5.05    0.43
   2  11   3    4.93    0.40
   2  11   3    5.29    0.59
  -2  11  -3    4.42    0.39
  -2 -11  -3    4.92    0.41
  -2 -11  -3    5.00    0.44
   2 -11   3    4.61    0.48
  -2 -11  -3    5.30    0.63
   2 -11   3    3.87    0.41
  -2 -11  -3    5.14    0.36
  -2  11  -4    2.63    0.40
  -2  11  -4    2.26    0.38
   2  11   4    2.81    0.54
   2  11   4    2.12    0.34
   2  11   4    2.94    0.47
  -2  11  -4    2.49    0.41
   2  11   4    1.73    0.91
   2  11   4    2.55    0.37
  -2 -11  -4    2.70    0.43
  -2 -11  -4    2.15    0.33
  -2 -11  -4    2.53    0.54
   2 -11   4    1.97    0.40
  -2 -11  -4    2.43    0.38
   2 -11   4    2.43    0.37
   2  11   5    3.63    0.43
   2  11   5    3.68    0.59
  -2  11  -5    3.11    0.50
   2  11   5    2.28    0.56
  -2  11  -5    2.86    0.52
   2  11   5    3.44    0.52
  -2 -11  -5    2.77    0.50
   2 -11   5    2.80    0.46
   2 -11   5    2.25    0.49
  -2 -11  -5    2.82    0.60
  -2 -11  -5    3.63    0.55
  -2 -11  -5    2.64    0.38
   2  11   6   16.11    0.91
  -2  11  -6   16.87    1.13
  -2  11  -6   15.93    1.00
   2  11   6   16.20    0.98
   2  11   6   18.02    1.22
   2  11   6   15.51    1.11
  -2 -11  -6   16.11    1.22
  -2 -11  -6   18.66    1.06
  -2 -11  -6   17.66    0.87
   2 -11   6   18.38    1.17
   2 -11   6   15.13    1.06
   2  11   7   27.65    1.51
   2  11   7   29.91    1.61
  -2  11  -7   31.70    1.65
   2  11   7   26.68    1.34
   2  11   7   28.72    1.46
  -2  11  -7   27.40    1.66
  -2 -11  -7   28.57    1.30
   2 -11   7   27.61    1.50
  -2 -11  -7   27.12    1.68
   2 -11   7   27.57    1.60
   2  11   8    7.09    0.96
  -2  11  -8    7.89    1.09
   2  11   8    5.77    0.91
   2 -11   8    9.32    1.07
  -2 -11  -8    5.76    0.85
   2 -11   8    7.82    1.10
  -2 -11  -8    8.65    1.02
   2  11   9   -0.69    0.68
  -2  11  -9    0.32    0.77
   2  11   9    0.12    0.77
   2 -11   9   -0.75    0.73
  -2 -11  -9    1.30    0.67
  -2 -11  -9    1.18    0.61
  -2  11 -10   -0.12    0.99
   2  11  10   -0.53    0.88
   2  11  10    1.42    1.06
   2 -11  10    1.69    0.97
  -2 -11 -10    0.21    0.82
  -2 -12  11   -0.62    1.09
   2 -12 -11   -1.17    0.99
  -2  12  10   -0.73    0.74
   2  12 -10    0.39    0.88
  -2  12  10    0.81    0.89
  -2 -12  10    1.34    1.04
   2 -12 -10   -0.36    0.78
   2  12  -9    0.49    0.75
   2  12  -9    1.24    0.36
  -2  12   9    0.69    0.66
  -2  12   9   -0.06    0.67
   2 -12  -9    0.83    0.63
   2 -12  -9    0.89    0.58
  -2 -12   9   -0.36    0.83
   2  12  -8    2.88    1.11
  -2  12   8    3.49    0.66
   2  12  -8    3.72    0.41
  -2  12   8    2.17    0.67
   2 -12  -8    3.20    0.64
  -2 -12   8    2.07    0.86
  -2 -12   8    3.87    0.90
   2 -12  -8    4.56    0.74
  -2  12   7    8.64    0.77
  -2  12   7    9.55    1.05
   2  12  -7    8.32    0.47
  -2  12   7    9.48    1.80
   2  12  -7    8.56    0.99
   2  12  -7    8.41    0.44
   2  12  -7    8.60    1.01
  -2  12   7    9.04    0.86
   2 -12  -7    9.84    0.71
   2 -12  -7    9.58    0.84
  -2 -12   7    8.92    1.04
   2 -12  -7    9.62    1.08
   2 -12  -7    9.18    1.15
   2  12  -6    5.20    0.78
  -2  12   6    5.66    0.66
   2  12  -6    5.06    0.81
  -2  12   6    5.25    0.77
  -2  12   6    5.27    0.56
   2 -12  -6    6.11    0.86
  -2 -12   6    5.45    0.80
   2 -12  -6    5.15    0.93
  -2 -12   6    6.67    0.88
   2 -12  -6    6.06    0.53
   2 -12  -6    5.94    0.65
   2  12  -5    2.79    0.50
  -2  12   5    3.62    0.56
  -2  12   5    3.39    0.46
   2  12  -5    2.36    0.52
  -2  12   5    2.39    0.38
  -2 -12   5    2.59    0.58
  -2 -12   5    2.93    0.54
   2 -12  -5    2.31    0.46
   2 -12  -5    3.33    0.69
   2 -12  -5    3.10    0.47
   2 -12  -5    2.81    0.34
   2  12  -4    5.34    0.59
  -2  12   4    3.82    0.42
  -2  12   4    3.54    0.54
  -2  12   4    4.24    0.37
  -2  12   4    4.19    0.89
   2  12  -4    3.96    0.59
   2 -12  -4    4.39    0.50
   2 -12  -4    3.77    0.30
  -2 -12   4    4.25    0.62
   2 -12  -4    4.51    0.61
  -2 -12   4    4.32    0.63
   2 -12  -4    3.68    0.62
   2 -12  -4    3.96    0.56
   2 -12  -4    4.16    0.42
   2  12  -3    1.58    0.35
  -2  12   3    1.73    0.21
  -2  12   3    2.34    0.27
  -2  12   3    2.15    0.51
   2  12  -3    1.95    0.38
  -2  12   3    2.03    0.34
  -2 -12   3    1.91    0.37
   2 -12  -3    2.09    0.46
  -2 -12   3    2.06    0.40
   2 -12  -3    1.73    0.17
   2 -12  -3    1.85    0.23
   2 -12  -3    1.90    0.38
   2 -12  -3    1.95    0.28
   2 -12  -3    2.03    0.41
   2  12  -2    1.28    0.29
   2  12  -2    1.08    0.16
   2  12  -2    1.44    0.29
   2 -12  -2    1.32    0.41
  -2 -12   2    1.03    0.32
   2 -12  -2    0.98    0.24
  -2 -12   2    1.09    0.17
  -2 -12   2    1.38    0.32
   2 -12  -2    1.09    0.29
   2  12  -1    3.07    0.35
   2  12  -1    3.57    0.43
  -2  12   1    3.77    0.36
   2  12  -1    3.36    0.40
   2  12  -1    3.26    0.41
  -2  12   1    4.05    0.46
   2  12  -1    2.67    0.24
   2 -12  -1    3.49    0.45
   2 -12  -1    3.31    0.37
   2 -12  -1    4.25    0.61
  -2 -12   1    3.83    0.43
  -2 -12   1    3.09    0.38
  -2 -12   1    3.53    0.32
   2 -12  -1    3.58    0.34
   2 -12  -1    3.09    0.36
   2 -12  -1    3.26    0.44
  -2  12   0    7.09    0.51
   2  12   0    7.35    0.57
   2  12   0    6.24    0.45
   2  12   0    6.79    0.50
  -2  12   0    6.83    0.26
   2  12   0    8.00    0.52
  -2  12   0    6.85    0.44
  -2 -12   0    7.08    0.46
   2 -12   0    6.73    0.47
   2 -12   0    6.99    0.52
  -2 -12   0    6.59    0.45
  -2 -12   0    7.47    0.36
  -2 -12   0    8.64    0.87
  -2 -12   0    7.42    0.53
  -2 -12   0    7.24    0.32
   2 -12   0    7.07    0.45
  -2  12  -1   83.18    2.52
   2  12   1   78.53    2.69
   2  12   1   85.05    2.62
  -2  12  -1   79.93    2.51
   2  12   1   80.06    2.45
  -2  12  -1   79.52    2.55
   2  12   1   80.46    2.56
  -2  12  -1   80.84    2.42
   2 -12   1   83.29    2.45
   2 -12   1   77.25    2.52
   2 -12   1   81.48    2.55
   2 -12   1   80.31    2.42
  -2 -12  -1   80.21    2.50
  -2 -12  -1   81.00    2.44
  -2 -12  -1   80.19    2.48
  -2 -12  -1   81.23    2.60
  -2 -12  -1   93.58    3.37
   2  12   2   37.98    1.37
   2  12   2   38.21    1.57
   2  12   2   44.47    2.10
  -2  12  -2   37.83    1.35
  -2  12  -2   39.23    1.35
  -2  12  -2   38.76    1.33
   2  12   2   39.68    1.31
  -2  12  -2   38.44    1.37
  -2  12  -2   38.80    1.34
  -2 -12  -2   38.18    1.34
  -2 -12  -2   37.42    1.29
  -2 -12  -2   41.35    2.24
   2 -12   2   37.67    1.28
   2 -12   2   38.74    1.37
   2 -12   2   38.46    1.33
  -2 -12  -2   38.93    1.44
   2  12   3    2.78    0.44
   2  12   3    3.16    0.34
   2  12   3    3.40    0.58
   2  12   3    2.80    0.35
  -2  12  -3    2.50    0.38
  -2  12  -3    2.46    0.42
  -2  12  -3    2.45    0.35
   2 -12   3    2.46    0.37
   2 -12   3    2.65    0.46
  -2 -12  -3    2.76    0.36
  -2 -12  -3    3.23    0.58
   2 -12   3    2.15    0.20
  -2 -12  -3    2.62    0.41
  -2 -12  -3    2.87    0.30
   2  12   4   -0.13    0.22
  -2  12  -4   -0.22    0.23
   2  12   4   -0.01    0.19
  -2  12  -4   -0.24    0.28
   2  12   4    0.22    0.41
   2  12   4    0.21    0.33
   2  12   4    1.24    0.92
  -2  12  -4    0.24    0.25
  -2 -12  -4   -0.14    0.39
   2 -12   4   -0.13    0.20
  -2 -12  -4    0.04    0.24
  -2 -12  -4    0.29    0.25
   2 -12   4   -0.06    0.31
  -2 -12  -4    0.05    0.17
  -2  12  -5    0.63    0.35
   2  12   5    0.53    0.28
   2  12   5    0.06    0.42
  -2  12  -5    0.01    0.40
   2  12   5    0.83    0.47
   2  12   5    0.59    0.30
  -2 -12  -5    0.37    0.32
  -2 -12  -5    0.62    0.24
  -2 -12  -5    0.86    0.32
   2 -12   5    0.04    0.32
  -2 -12  -5    0.17    0.53
   2 -12   5    0.14    0.39
  -2  12  -6    7.13    0.84
  -2  12  -6    6.89    0.74
   2  12   6    6.46    0.71
   2  12   6    6.47    0.66
   2  12   6    6.17    0.87
   2  12   6    7.62    0.96
  -2 -12  -6    6.10    0.58
   2 -12   6    6.11    0.80
  -2 -12  -6    8.49    0.77
   2 -12   6    6.98    0.87
  -2 -12  -6    6.35    1.01
  -2  12  -7   29.62    1.72
   2  12   7   26.31    1.49
   2  12   7   28.39    1.79
   2  12   7   26.51    1.55
   2  12   7   28.16    1.44
  -2  12  -7   22.87    1.45
  -2 -12  -7   25.54    1.67
  -2 -12  -7   28.44    1.23
  -2 -12  -7   26.45    1.52
   2 -12   7   28.58    1.59
   2 -12   7   26.38    1.47
  -2  12  -8    1.02    0.73
   2  12   8    0.40    0.58
   2  12   8    0.49    0.61
   2 -12   8    1.83    0.70
  -2 -12  -8    0.62    0.47
  -2 -12  -8    0.88    0.55
   2 -12   8    1.02    0.68
   2  12   9    0.02    0.74
  -2  12  -9    0.10    0.75
   2  12   9    0.62    0.76
  -2 -12  -9    0.41    0.67
   2 -12   9   -0.02    0.74
  -2 -12  -9   -0.53    0.58
  -2  12 -10    5.84    1.28
   2  12  10    4.94    1.12
  -2 -12 -10    6.18    1.13
  -2  13  10    3.22    1.01
   2  13 -10    1.36    0.97
   2 -13 -10    1.93    0.82
  -2 -13  10    1.28    1.07
   2  13  -9    3.24    0.90
  -2  13   9    4.47    0.89
  -2  13   9    2.89    0.77
  -2 -13   9    3.71    0.99
   2 -13  -9    3.43    0.78
   2  13  -8   -1.35    1.08
  -2  13   8    1.13    0.58
  -2  13   8   -0.01    1.30
  -2  13   8    0.79    0.58
   2 -13  -8   -0.60    0.41
   2 -13  -8   -0.20    0.47
  -2 -13   8   -0.10    0.63
  -2  13   7    5.02    0.73
  -2  13   7    5.90    0.68
   2  13  -7    5.05    0.79
  -2  13   7    4.30    1.11
  -2 -13   7    6.48    1.00
   2 -13  -7    4.49    0.72
   2 -13  -7    3.36    0.69
   2 -13  -7    5.35    0.60
   2 -13  -7    5.11    0.98
  -2 -13   7    5.78    0.87
  -2  13   6    0.06    0.88
  -2  13   6    0.54    0.46
   2  13  -6    1.32    0.52
  -2  13   6    0.73    0.39
  -2  13   6    1.58    0.35
   2  13  -6    0.84    0.51
   2 -13  -6    0.90    0.30
   2 -13  -6    1.48    0.56
   2 -13  -6    1.68    0.67
  -2 -13   6    1.68    0.60
  -2 -13   6    1.41    0.51
   2 -13  -6    1.22    0.40
  -2  13   5    5.58    0.55
  -2  13   5    5.85    0.70
  -2  13   5    5.41    0.46
   2  13  -5    5.63    0.72
   2  13  -5    5.00    0.74
   2 -13  -5    5.22    0.82
  -2 -13   5    5.58    0.77
  -2 -13   5    6.31    0.76
   2 -13  -5    5.60    0.41
   2 -13  -5    5.15    0.63
   2 -13  -5    5.51    0.55
   2 -13  -5    5.08    0.72
  -2  13   4    0.31    0.34
   2  13  -4    0.04    0.29
  -2  13   4    0.22    0.25
   2  13  -4    0.28    0.33
  -2  13   4   -0.01    0.45
  -2 -13   4    0.45    0.33
   2 -13  -4   -0.23    0.39
  -2 -13   4    0.04    0.41
   2 -13  -4    0.20    0.35
   2 -13  -4    0.65    0.29
   2 -13  -4    0.45    0.22
   2 -13  -4   -0.22    0.32
   2  13  -3   14.58    0.70
  -2  13   3   15.19    0.54
   2  13  -3   15.04    0.82
   2  13  -3   14.87    0.61
  -2  13   3   15.33    1.05
   2  13  -3   13.92    0.81
  -2  13   3   14.14    0.57
   2  13  -3   14.28    0.86
  -2  13   3   15.22    0.77
   2 -13  -3   14.41    0.53
   2 -13  -3   14.13    0.92
   2 -13  -3   14.96    0.87
   2 -13  -3   14.57    0.84
  -2 -13   3   15.08    0.88
  -2 -13   3   13.98    0.85
   2 -13  -3   14.73    0.49
   2 -13  -3   14.99    0.74
   2  13  -2    0.73    0.28
   2  13  -2    0.31    0.24
   2  13  -2    0.52    0.15
   2  13  -2    0.46    0.27
   2  13  -2    0.31    0.23
  -2 -13   2    0.36    0.29
   2 -13  -2    0.64    0.31
   2 -13  -2    0.69    0.27
   2 -13  -2    0.47    0.57
   2 -13  -2    1.11    0.24
  -2 -13   2    0.65    0.30
   2 -13  -2    0.73    0.29
  -2 -13   2    0.57    0.13
   2 -13  -2    0.49    0.26
   2  13  -1    1.51    0.32
   2  13  -1    1.89    0.35
   2  13  -1    1.78    0.35
  -2  13   1    1.87    0.37
  -2  13   1    1.73    0.29
   2  13  -1    1.68    0.22
   2  13  -1    1.65    0.27
   2 -13  -1    1.88    0.31
  -2 -13   1    1.85    0.33
   2 -13  -1    1.22    0.42
  -2 -13   1    2.07    0.35
  -2 -13   1    1.77    0.30
   2 -13  -1    1.73    0.30
   2 -13  -1    1.94    0.33
   2 -13  -1    2.12    0.39
   2  13   0   58.44    2.11
  -2  13   0   66.91    1.90
  -2  13   0   64.41    2.18
  -2  13   0   64.28    1.88
   2  13   0   65.62    2.15
  -2  13   0   63.82    2.09
   2  13   0   67.44    2.25
  -2 -13   0   67.36    2.12
  -2 -13   0   65.83    1.94
   2 -13   0   65.35    2.19
  -2 -13   0   63.82    2.09
   2 -13   0   64.80    2.13
   2 -13   0   67.26    2.09
  -2 -13   0   68.22    1.99
  -2 -13   0   65.74    2.19
  -2 -13   0   72.75    2.78
  -2  13  -1    8.79    0.52
  -2  13  -1    8.22    0.51
  -2  13  -1    7.38    0.54
   2  13   1    8.55    0.66
   2  13   1    9.07    0.44
   2  13   1    9.21    0.55
   2  13   1    8.25    0.66
  -2  13  -1    8.25    0.40
  -2 -13  -1    9.04    0.45
   2 -13   1    8.38    0.45
  -2 -13  -1    9.06    0.48
   2 -13   1    7.86    0.52
  -2 -13  -1    8.35    0.58
   2 -13   1    8.30    0.53
   2 -13   1    7.85    0.39
  -2 -13  -1    9.31    0.48
  -2  13  -2   30.50    1.14
   2  13   2   33.71    1.76
  -2  13  -2   31.28    1.14
  -2  13  -2   29.29    1.15
   2  13   2   29.72    1.07
   2  13   2   31.45    1.37
  -2  13  -2   29.55    1.12
  -2  13  -2   30.33    1.10
  -2 -13  -2   29.36    1.06
   2 -13   2   29.50    1.07
  -2 -13  -2   29.32    1.21
  -2 -13  -2   30.03    1.10
   2 -13   2   29.57    1.13
   2 -13   2   29.63    1.09
  -2 -13  -2   30.43    1.11
   2  13   3    5.42    0.52
   2  13   3    6.26    1.07
   2  13   3    5.21    0.41
  -2  13  -3    5.18    0.45
   2  13   3    4.97    0.46
  -2  13  -3    4.95    0.47
   2  13   3    4.22    0.63
  -2  13  -3    4.32    0.51
  -2  13  -3    4.65    0.45
  -2 -13  -3    5.00    0.37
   2 -13   3    4.30    0.43
   2 -13   3    4.28    0.29
  -2 -13  -3    5.19    0.51
  -2 -13  -3    5.04    0.43
   2 -13   3    4.13    0.51
  -2 -13  -3    5.56    0.69
   2  13   4    6.46    0.64
  -2  13  -4    5.22    0.64
  -2  13  -4    5.63    0.52
   2  13   4    6.19    0.72
   2  13   4    5.63    0.50
  -2  13  -4    5.49    0.55
   2  13   4    5.83    0.50
   2  13   4    5.31    1.31
   2 -13   4    6.65    0.68
  -2 -13  -4    5.32    0.57
  -2 -13  -4    5.89    0.43
  -2 -13  -4    6.27    0.82
   2 -13   4    5.07    0.53
  -2 -13  -4    5.19    0.53
   2  13   5   -0.21    0.85
  -2  13  -5    0.95    0.35
   2  13   5    1.00    0.32
   2  13   5    1.73    0.61
  -2  13  -5    0.89    0.38
   2  13   5    1.16    0.34
   2  13   5    0.66    0.45
  -2  13  -5    0.93    0.46
  -2 -13  -5    1.04    0.62
   2 -13   5    1.78    0.43
  -2 -13  -5    1.06    0.28
  -2 -13  -5    0.60    0.34
  -2 -13  -5    1.02    0.38
   2 -13   5    1.45    0.47
   2  13   6    2.33    0.60
   2  13   6    2.40    0.48
  -2  13  -6    1.63    0.44
  -2  13  -6    2.18    0.58
   2  13   6    1.75    0.42
   2  13   6    2.27    1.24
   2  13   6    3.19    0.74
  -2 -13  -6    1.63    0.78
   2 -13   6    2.52    0.55
   2 -13   6    1.61    0.52
  -2 -13  -6    2.51    0.53
  -2 -13  -6    2.37    0.40
   2  13   7    1.35    0.70
   2  13   7    0.79    0.50
   2  13   7    0.77    0.56
   2  13   7    0.74    0.50
  -2  13  -7    1.38    0.55
  -2 -13  -7    0.90    0.48
  -2 -13  -7    1.10    0.48
  -2 -13  -7    0.75    0.84
  -2 -13  -7    0.82    0.48
   2 -13   7    0.99    0.60
   2 -13   7    0.78    0.54
   2  13   8    7.27    1.07
   2  13   8    9.43    1.13
  -2  13  -8    9.90    1.27
   2 -13   8    8.56    1.16
  -2 -13  -8    9.65    1.07
  -2 -13  -8    8.84    0.87
   2 -13   8    8.92    1.22
   2  13   9   -0.58    0.63
   2  13   9    0.51    0.69
  -2  13  -9   -0.56    0.82
  -2 -13  -9    0.54    0.64
  -2 -13  -9   -0.89    0.55
   2 -13   9   -1.49    0.79
  -2  13 -10   13.13    1.89
   2  13  10   10.08    1.60
   2  13  10    8.56    1.56
   2 -13  10   10.84    1.73
  -2 -13 -10   11.35    1.49
   2  14 -10   -1.01    0.90
  -2  14  10    0.75    0.89
  -2 -14  10    0.48    1.03
   2 -14 -10    1.17    0.75
  -2  14   9    0.70    0.66
  -2  14   9   -0.55    0.69
   2 -14  -9    0.38    0.83
   2 -14  -9   -0.53    0.62
  -2 -14   9   -0.28    0.78
  -2  14   8    0.76    0.51
  -2  14   8    0.75    1.31
  -2  14   8    0.18    0.56
  -2 -14   8    0.71    0.71
   2 -14  -8    0.87    0.42
  -2 -14   8   -1.54    0.75
   2 -14  -8    0.01    0.49
  -2  14   7   -0.24    0.36
  -2  14   7   -1.02    1.03
  -2  14   7   -0.07    0.43
   2  14  -7    0.32    0.50
  -2  14   7   -0.19    0.44
   2  14  -7    0.14    0.64
  -2 -14   7   -0.08    0.57
   2 -14  -7   -0.13    0.91
   2 -14  -7    0.40    0.31
   2 -14  -7    0.56    0.39
   2 -14  -7    0.22    0.54
  -2 -14   7   -0.53    0.56
   2  14  -6    9.53    0.47
   2  14  -6   10.01    0.99
   2  14  -6   11.23    0.98
  -2  14   6    9.87    0.69
  -2  14   6   10.31    0.90
   2 -14  -6   11.85    0.78
   2 -14  -6   10.01    0.62
  -2 -14   6    8.37    1.00
   2 -14  -6    9.50    1.13
   2 -14  -6   10.14    0.99
  -2 -14   6   10.56    1.01
   2 -14  -6   10.21    0.82
   2  14  -5    6.65    0.79
  -2  14   5    4.19    0.96
  -2  14   5    6.30    0.47
  -2  14   5    5.58    0.52
  -2  14   5    5.40    0.71
   2  14  -5    5.81    0.43
   2  14  -5    6.08    0.75
  -2 -14   5    6.06    0.88
   2 -14  -5    5.48    0.64
  -2 -14   5    6.23    0.74
   2 -14  -5    6.92    0.81
   2 -14  -5    5.61    0.54
   2 -14  -5    5.63    0.84
   2 -14  -5    5.22    0.39
   2 -14  -5    5.96    0.81
  -2  14   4   15.57    0.88
   2  14  -4   15.67    0.71
   2  14  -4   15.30    0.90
   2  14  -4   14.54    0.95
   2 -14  -4   13.11    0.95
   2 -14  -4   15.18    0.58
   2 -14  -4   14.85    1.08
   2 -14  -4   17.04    0.85
  -2 -14   4   15.13    0.98
  -2 -14   4   14.76    0.94
   2 -14  -4   15.25    0.96
   2  14  -3    4.61    0.53
   2  14  -3    4.25    0.35
  -2  14   3    3.54    0.47
  -2  14   3    4.08    0.23
   2  14  -3    3.69    0.57
  -2  14   3    3.80    0.30
   2  14  -3    3.87    0.51
   2  14  -3    3.77    0.44
  -2 -14   3    3.22    0.52
  -2 -14   3    4.98    0.56
   2 -14  -3    4.56    0.57
   2 -14  -3    5.48    0.63
   2 -14  -3    4.27    0.49
   2 -14  -3    4.54    0.66
   2  14  -2   20.68    0.98
   2  14  -2   19.80    0.95
   2  14  -2   20.72    0.91
   2  14  -2   20.22    0.75
   2  14  -2   19.27    0.87
   2 -14  -2   20.30    0.87
   2 -14  -2   19.90    0.97
  -2 -14   2   20.59    0.71
   2 -14  -2   20.53    1.06
  -2 -14   2   19.71    0.98
   2 -14  -2   19.83    0.93
   2 -14  -2   20.50    0.96
  -2 -14   2   20.47    1.00
   2  14  -1   34.24    1.33
  -2  14   1   35.28    1.39
   2  14  -1   33.08    1.13
  -2  14   1   33.94    1.27
   2  14  -1   35.95    1.34
   2  14  -1   36.19    1.24
   2  14  -1   34.27    1.34
   2 -14  -1   34.21    1.31
  -2 -14   1   34.30    1.19
   2 -14  -1   35.58    1.25
   2 -14  -1   34.10    1.27
  -2 -14   1   32.64    1.31
   2 -14  -1   30.75    1.45
  -2 -14   1   33.08    1.06
   2 -14  -1   35.00    1.41
   2 -14  -1   39.55    1.74
  -2 -14   1   33.51    1.28
  -2  14   0    2.28    0.35
   2  14   0    1.93    0.33
  -2  14   0    2.13    0.14
  -2  14   0    1.89    0.17
   2  14   0    1.79    0.40
   2  14   0    1.69    0.29
  -2  14   0    2.60    0.43
   2  14   0    2.06    0.39
  -2 -14   0    1.74    0.35
   2 -14   0    2.35    0.38
  -2 -14   0    1.76    0.24
  -2 -14   0    1.90    0.27
  -2 -14   0    1.69    0.53
  -2 -14   0    2.42    0.33
   2 -14   0    2.27    0.33
  -2 -14   0    1.91    0.33
  -2 -14   0    2.05    0.35
   2 -14   0    2.20    0.40
   2 -14   0    2.28    0.31
  -2  14  -1    7.83    0.52
  -2  14  -1    7.05    0.38
   2  14   1    6.68    0.63
  -2  14  -1    5.91    0.47
   2  14   1    7.37    0.40
  -2  14  -1    7.93    0.55
   2  14   1    8.07    0.57
  -2 -14  -1    7.07    0.57
   2 -14   1    7.40    0.53
  -2 -14  -1    7.62    0.42
   2 -14   1    7.47    0.43
   2 -14   1    7.11    0.36
  -2 -14  -1    7.14    0.44
   2 -14   1    6.16    0.50
  -2 -14  -1    6.49    0.45
   2  14   2   14.99    0.92
   2  14   2   15.26    0.79
   2  14   2   15.16    1.25
  -2  14  -2   15.23    0.73
   2  14   2   15.42    0.66
   2  14   2   13.86    0.71
  -2  14  -2   15.64    0.76
  -2  14  -2   15.01    0.73
  -2  14  -2   15.80    0.73
  -2 -14  -2   14.48    0.66
  -2 -14  -2   15.63    0.69
   2 -14   2   15.00    0.73
  -2 -14  -2   16.11    0.72
   2 -14   2   15.14    0.68
   2 -14   2   14.79    0.67
  -2 -14  -2   14.73    0.81
  -2  14  -3   37.29    1.43
  -2  14  -3   35.97    1.33
   2  14   3   37.05    1.63
  -2  14  -3   37.73    1.36
   2  14   3   38.15    1.36
   2  14   3   37.93    1.37
  -2  14  -3   37.61    1.39
  -2  14  -3   36.38    1.35
   2  14   3   33.29    2.07
   2  14   3   39.00    1.33
   2 -14   3   36.55    1.37
  -2 -14  -3   37.49    1.27
   2 -14   3   35.91    1.17
  -2 -14  -3   35.96    1.62
   2 -14   3   35.75    1.42
  -2 -14  -3   36.44    1.46
  -2 -14  -3   37.75    1.35
   2  14   4   10.05    0.62
  -2  14  -4    9.98    0.79
  -2  14  -4    7.74    0.99
   2  14   4   10.92    0.64
   2  14   4    9.29    0.88
  -2  14  -4   10.21    0.72
   2  14   4   10.77    0.76
   2  14   4    7.49    1.39
   2 -14   4    9.89    0.77
  -2 -14  -4   10.00    0.95
  -2 -14  -4    9.87    0.65
  -2 -14  -4   10.12    0.73
   2 -14   4    9.71    0.76
  -2 -14  -4   10.57    0.56
   2  14   5   10.59    1.86
   2  14   5   15.60    1.13
   2  14   5   13.34    0.95
  -2  14  -5   14.89    0.84
   2  14   5   13.61    0.80
  -2  14  -5   15.38    0.91
   2  14   5   14.66    0.86
  -2  14  -5   15.58    1.00
   2 -14   5   14.51    1.03
   2 -14   5   13.43    0.90
  -2 -14  -5   14.54    0.73
  -2 -14  -5   13.41    1.19
  -2 -14  -5   13.47    0.86
  -2 -14  -5   15.30    0.93
  -2  14  -6    2.95    0.50
  -2  14  -6    2.85    0.57
   2  14   6    3.37    0.56
   2  14   6    4.94    0.83
   2  14   6    2.85    0.49
   2  14   6    4.76    0.88
  -2  14  -6    3.57    0.66
  -2 -14  -6    3.17    0.49
   2 -14   6    3.18    0.65
   2 -14   6    2.91    0.58
  -2 -14  -6    3.17    0.81
  -2 -14  -6    5.17    0.70
  -2 -14  -6    3.73    0.61
   2  14   7   20.66    1.25
   2  14   7   21.54    1.45
   2  14   7   21.48    1.34
   2  14   7   19.20    1.31
  -2  14  -7   22.17    1.41
   2 -14   7   19.35    1.38
  -2 -14  -7   18.72    1.18
   2 -14   7   20.26    1.34
  -2 -14  -7   17.51    1.41
  -2 -14  -7   21.65    1.24
  -2 -14  -7   17.20    1.53
  -2  14  -8    4.15    0.91
   2  14   8    6.13    1.04
   2  14   8    7.10    1.13
  -2 -14  -8    6.31    0.98
   2 -14   8    4.51    0.86
  -2 -14  -8    4.38    0.75
  -2 -14  -8    4.95    0.68
   2 -14   8    6.17    0.94
   2  14   9    3.84    0.89
  -2  14  -9    4.26    1.04
   2  14   9    5.10    0.95
  -2 -14  -9    3.28    0.77
   2 -14   9    3.78    0.93
  -2 -14  -9    3.87    0.85
  -2 -14  -9    5.16    0.93
   2  14  10    2.27    1.02
  -2  14 -10    1.35    1.14
   2  14  10    0.70    1.05
  -2 -14 -10    3.17    0.83
  -2 -14 -10    2.28    0.90
   2 -14  10    2.35    1.06
  -2  15  10    0.27    0.92
   2  15 -10    0.08    0.97
   2 -15 -10   -0.44    0.82
  -2 -15  10   -0.81    1.04
   2  15  -9    3.28    0.90
  -2  15   9    2.79    0.84
  -2  15   9    3.00    0.84
  -2 -15   9    1.77    0.94
   2 -15  -9    3.49    0.80
  -2  15   8   -0.60    0.60
   2  15  -8    1.08    0.94
  -2  15   8    0.57    1.29
  -2  15   8    0.60    0.53
   2 -15  -8    0.25    0.54
   2 -15  -8    0.41    0.42
  -2 -15   8   -1.47    0.73
  -2  15   7   22.08    1.22
   2  15  -7   23.45    1.45
  -2  15   7   23.18    1.32
  -2  15   7   20.46    1.11
   2 -15  -7   21.43    1.16
  -2 -15   7   19.94    1.47
   2 -15  -7   20.67    1.02
  -2 -15   7   23.43    1.48
  -2  15   6    0.72    0.44
  -2  15   6    0.52    0.87
  -2  15   6    1.00    0.34
  -2  15   6    0.66    0.29
   2  15  -6    1.08    0.50
   2  15  -6    0.75    0.52
   2 -15  -6    0.39    0.34
   2 -15  -6    0.92    0.25
   2 -15  -6    0.86    0.67
   2 -15  -6    0.22    0.45
  -2 -15   6    1.06    0.56
  -2 -15   6   -0.33    0.49
   2 -15  -6    1.10    0.55
   2  15  -5    5.34    0.78
   2  15  -5    4.85    0.40
  -2  15   5    5.25    0.50
  -2  15   5    3.78    0.66
   2  15  -5    5.28    0.78
  -2  15   5    3.88    0.42
   2 -15  -5    4.75    0.51
  -2 -15   5    5.51    0.78
   2 -15  -5    4.65    0.36
   2 -15  -5    4.46    0.76
   2 -15  -5    4.97    0.91
  -2 -15   5    4.71    0.81
[truncated: 1,171,342 more chars]
